# Supplementary material for: Dysfunctions of the paraventricular hypothalamic nucleus induce hypersomnia in mice
Source: eLife. 2021 Nov 17;10:e69909. doi: 10.7554/eLife.69909 (PMC8631797; doi:10.7554/eLife.69909)
Supplement: Figure 2—source data 1. [file elife-69909-fig2-data1.xlsx]

## Sheet: Figure 2D
Figure 2D
	n=7	Wake	REM	NREM
	deltaF/F	0.20895	0.045429	-0.027873
		0.10573	0.03012	-0.222
		0.064114	0.021413	-0.16907
		0.05204	-0.0023208	-0.077245
		0.042312	-0.00765	-0.057247
		0.023892	-0.017546	-0.33819
		0.04204	-0.048071	-0.29913

## Sheet: Figure 2H
Figure 2H
	n=8
		NREM	Wake	REM
		4.2	7.3	5.3
		3.7	8.2	4
		5.6	6.4	6.1
		3.8	5.3	4.3
		7.3	8	7
		6.1	6.4	5.8
		5.5	6.7	5.2
		4.8	7.7	5

## Sheet: Figure 2I
Figure 3D
		Bottom left
		n=8	NREM-Wake										Bottom right
			-7.5	3	4	2	5	4	2	3	3		NREM	Wake
			-6.5	2	3	5	3	4	2	3	2		3.625	9.625
			-5.5	4	2	3	3	3	3	1	4		2.75	10.125
			-4.5	4	3	5	4	2	3	3	6		3.375	10
			-3.5	4	3	4	2	5	2	1	3		3.375	9.25
			-2.5	4	2	3	2	6	3	3	4		4.125	10.125
			-1.5	3	3	2	4	4	6	3	5		3	9.125
			-0.5	5	2	3	4	5	3	4	4		2.625	10
			0.5	12	18	15	14	12	10	14	11		3.875	11
			1.5	11	13	12	10	13	8	11	12
			2.5	9	8	10	11	10	11	9	13
			3.5	9	8	10	8	11	7	10	12
			4.5	12	8	10	8	9	9	10	7
			5.5	9	8	8	7	11	9	10	12
			6.5	8	9	7	9	7	10	9	11
			7.5	7	9	8	7	8	9	7	10
			Wake-NREM
			-7.5	7	10	6	7	8	9	6	12		Wake	NREM
			-6.5	6	7	9	8	9	8	7	8		8.125	4.375
			-5.5	6	8	7	6	7	8	8	10		7.75	3.875
			-4.5	7	7	8	6	9	9	7	11		7.5	4.5
			-3.5	8	7	6	9	7	11	7	7		8	3.75
			-2.5	6	7	8	6	7	9	6	8		7.75	4.125
			-1.5	8	5	7	6	6	9	5	9		7.125	3.5
			-0.5	6	7	5	6	8	9	7	6		6.875	3.875
			0.5	4	5	3	5	6	4	3	5		6.75	4.875
			1.5	4	3	5	4	5	2	5	3
			2.5	5	4	3	5	5	7	3	4
			3.5	3	4	5	4	4	1	5	4
			4.5	4	3	4	5	3	5	4	5
			5.5	5	3	4	3	5	2	3	3
			6.5	4	3	4	5	3	5	4	3
			7.5	5	4	4	5	3	6	7	5
			REM-Wake
			-7.5	6	3	2	5	4	0	3	7		REM	Wake
			-6.5	4	0	5	5	4	2	3	2		4.625	8.75
			-5.5	4	2	3	3	3	7	1	4		4.25	10
			-4.5	6	4	5	4	0	3	3	6		4.25	9.5
			-3.5	4	3	4	2	5	2	1	3		4	8.625
			-2.5	5	2	3	5	6	0	3	4		2.875	9.25
			-1.5	3	4	7	4	5	6	7	5		3.5	8.75
			-0.5	5	3	5	4	5	3	7	4		5	9.125
			0.5	10	15	12	11	9	10	12	8		4.375	10
			1.5	8	12	11	11	9	8	7	10
			2.5	7	11	10	8	10	8	8	10
			3.5	9	8	10	8	11	7	10	12
			4.5	12	8	10	8	9	9	10	7
			5.5	9	8	8	7	11	9	10	12
			6.5	8	9	7	9	7	10	9	11
			7.5	7	9	8	7	8	9	7	10
