# Supplementary material for: Dysfunctions of the paraventricular hypothalamic nucleus induce hypersomnia in mice
Source: eLife. 2021 Nov 17;10:e69909. doi: 10.7554/eLife.69909 (PMC8631797; doi:10.7554/eLife.69909)
Supplement: Figure 3—source data 1. [file elife-69909-fig3-data1.xlsx]

## Sheet: Figure 3C & 3D
Figure 3C & 3D
n=6	CNO	NREM sleep									CNO	Wake
	07:00:00	40.5	19.5	21.72	2.76	42	12.96	19.92			07:00:00	16.74	38.04	35.82	55.44	16.2	42.48	40.08
	08:00:00	32.12	25.02	40.3	47.94	13.2	27.36	22.14			08:00:00	24.72	32.58	16.98	9.24	43.98	27.18	37.86
	09:00:00	1.04	1.98	0	0	0	2	0.06			09:00:00	58.96	58.02	60	60	60	58	59.94
	10:00:00	0	0.06	0	0.12	0	2.34	0.24			10:00:00	60	59.88	60	59.88	60	57.66	59.76
	11:00:00	0.06	0.12	0	0	0.6	9.96	0.06			11:00:00	59.94	59.88	60	60	59.4	49.92	59.94
	12:00:00	0	1.2	0	0.06	0.78	10.5	0.18			12:00:00	60	58.8	60	59.94	59.22	49.02	59.82
	13:00:00	0.06	1.32	0	3.24	0.36	15.9	0.84			13:00:00	59.94	58.68	60	56.76	59.64	43.74	59.16
	14:00:00	3.24	1.02	0	7.26	1.26	26.16	13.08			14:00:00	56.76	57.96	60	52.74	58.74	33.66	46.92
	15:00:00	4.2	10.38	0	2.94	3.84	26.94	3.42			15:00:00	53.94	46.86	60	57.06	56.16	32.94	56.58
	16:00:00	13.74	20.4	0	17.34	11.34	23.88	7.98			16:00:00	43.26	37.2	60	42.66	48.66	35.64	52.02
	17:00:00	11.58	25.44	0	10.02	14.22	25.14	4.44			17:00:00	48.42	31.02	60	49.98	45.78	34.86	55.56
	18:00:00	20.22	21.66	0	19.74	24.66	28.62	9.48			18:00:00	38.76	33.12	60	40.26	35.34	31.38	50.52
	19:00:00	0.96	2.1	0	1.14	15.06	8.82	9.72			19:00:00	59.04	56.22	60	58.86	44.94	51.18	50.28
	20:00:00	1.56	3.78	0	0	15.96	8.16	5.64			20:00:00	58.44	55.56	60	60	44.04	51.84	54.36
	21:00:00	10.92	22.86	0	9.48	19.86	12.48	4.8			21:00:00	49.08	35.58	60	50.52	40.14	47.52	55.2
	22:00:00	11.04	11.82	0	7.56	14.58	9.24	8.28			22:00:00	48.36	45.96	60	51.36	44.34	50.76	51.72
	23:00:00	7.68	2.88	0	11.4	10.98	16.38	6.06			23:00:00	50.64	52.56	60	48.6	49.02	43.56	53.94
	1900-01-01	0.24	21.84	0	17.34	25.2	26.28	2.16			1900-01-01	58.2	32.04	60	42.66	34.8	33.72	57.84
	1900-01-01 01:00:00	26.7	17.22	0	18.96	14.58	22.5	1.8			1900-01-01 01:00:00	32.04	40.02	60	41.04	45.42	34.14	58.2
	1900-01-01 02:00:00	16.56	22.44	20.76	18.42	7.74	17.88	20.64			1900-01-01 02:00:00	40.86	33.84	35.52	35.04	45.72	38.34	39.36
	1900-01-01 03:00:00	24.24	33.18	16.14	7.5	14.7	11.64	22.86			1900-01-01 03:00:00	30.54	23.58	40.62	47.46	40.26	43.44	37.14
	1900-01-01 04:00:00	17.82	19.32	3.96	1.32	9.24	4.26	44.46			1900-01-01 04:00:00	42.18	40.68	56.04	58.14	41.22	55.74	15.54
	1900-01-01 05:00:00	15.12	10.08	15.18	6.78	10.2	10.86	19.56			1900-01-01 05:00:00	40.26	49.92	44.82	48	44.58	45.96	40.44
	1900-01-01 06:00:00	2.42	0.06	28.02	32.4	1.8	28.74	26.88			1900-01-01 06:00:00	56.34	59.94	24.54	25.26	55.86	29.94	33.12
	Vehicle										Vehicle
	07:00:00	40.14	37.46	19.74	23.6	33.12	38.58	26.52			07:00:00	17.82	17.4	36.12	31.92	17.4	15.54	33.48
	08:00:00	30.6	18.44	10.28	9.18	19.14	48	8.52			08:00:00	24.24	38.88	46.44	48.84	38.88	2.22	51.48
	09:00:00	20.28	9.06	29.7	14.22	10.8	15.96	17.06			09:00:00	38.52	49.2	28.56	45.78	49.2	40.38	42.88
	10:00:00	34.32	26.22	32.88	38.58	23.04	44.58	36.96			10:00:00	18.96	31.02	24.36	15.48	31.02	7.08	22.62
	11:00:00	35.04	43.2	33.72	46.74	42.24	31.56	49.44			11:00:00	20.22	10.74	20.22	6.24	10.74	23.76	7.74
	12:00:00	41.34	37.36	30.24	36.72	31.02	49.32	41.82			12:00:00	13.2	15.62	22.74	13.92	19.62	3.96	15.9
	13:00:00	35.76	24.52	18.98	31.56	30.18	22.56	15.36			13:00:00	16.8	27	33.54	23.62	27	34.08	42.12
	14:00:00	33.24	41.4	31.28	46.28	37.44	47.58	45.36			14:00:00	18.84	10.56	21.6	3.72	10.56	6.96	14.1
	15:00:00	37.2	37.8	27.9	29.76	38.82	20.16	31.08			15:00:00	13.86	16.26	26.16	25.32	16.26	39.84	25.32
	16:00:00	32.04	22.72	27.9	32.46	42.24	34.2	33.06			16:00:00	25.38	31.94	26.76	21.72	11.94	20.34	25.2
	17:00:00	29.16	39.24	27.6	31.38	41.94	30.18	31.08			17:00:00	27.12	12.24	23.88	22.8	12.24	22.14	25.38
	18:00:00	21.3	24.24	2.88	24	17.66	12.12	25.56			18:00:00	34.56	31.92	53.28	32.58	38.92	45.72	32.4
	19:00:00	14.34	13.44	11.28	21.42	4.32	0.12	23.16			19:00:00	41.94	45.48	47.64	34.38	51.48	59.64	35.22
	20:00:00	3.72	8.34	23.16	11.76	22.44	15.84	12.06			20:00:00	55.86	51.66	34.86	47.28	36.6	42.6	47.34
	21:00:00	6.18	14.42	0	1.08	19.9	16.14	1.02			21:00:00	52.8	42.58	60	58.92	40.1	42.78	55.44
	22:00:00	13.62	17.58	20.16	0.06	21.24	19.2	0			22:00:00	40.86	39	38.4	59.94	38.76	38.52	55.56
	23:00:00	12.42	25.8	25.26	0.36	16.68	0.06	0.18			23:00:00	43.32	29.94	34.74	59.64	43.32	59.94	59.82
	1900-01-01	10.32	24.76	5.92	0	15.82	0	0			1900-01-01	45.96	32.26	53.08	60	44.18	60	53.46
	1900-01-01 01:00:00	19.42	11.88	25.98	0.12	20.64	36.9	0			1900-01-01 01:00:00	33.86	47.04	32.4	59.88	39.36	21.24	58.08
	1900-01-01 02:00:00	19.14	30	6.24	18.9	9.9	14.94	19.02			1900-01-01 02:00:00	38.82	25.8	51.36	40.92	49.92	41.58	39.66
	1900-01-01 03:00:00	1.38	2.64	34.04	11.62	14.68	17.94	32.58			1900-01-01 03:00:00	58.62	57	24.16	42.2	39.14	39.72	24
	1900-01-01 04:00:00	14.34	10.06	21.9	17.8	20.94	26.28	0			1900-01-01 04:00:00	44.52	49.94	34.02	42.2	39.06	31.14	57.54
	1900-01-01 05:00:00	18.96	10.88	12.18	10	9.72	1.98	0.36			1900-01-01 05:00:00	39.84	49.12	47.82	50	50.28	58.02	59.16
	1900-01-01 06:00:00	16.54	14.4	11.82	30.66	11.28	10.68	31.08			1900-01-01 06:00:00	35.6	44.94	47.52	25.56	44.94	49.32	28.92

## Sheet: Figure 3E
Figure 3E
				NS	CNO
			1	166.74	135.9
			2	104.64	169.38
			3	162.96	84.06
			4	113.04	149.76
			5	174.6	182.16
			6	148.08	179.64
			7	119.46	142.62

## Sheet: Figure 3G
Figure 3G
	n=4
		vehicle						CNO
		Hz	1	2	3	4		Hz	1	2	3	4
		0	0.791008	0.120679	0.127931	0.684303		0	0.474044	0.181507	0.127839	0.410045
		0.25	3.85792	0.511368	0.534514	3.21174		0.25	2.05229	0.859916	0.547	1.9952
		0.5	2.85073	1.09098	1.04146	2.63373		0.5	1.92345	1.27179	0.968277	1.88092
		0.75	2.35505	1.74179	1.77055	2.41431		0.75	2.03722	1.86322	1.64024	2.11837
		1	2.51846	2.21944	2.4729	2.72655		1	2.27619	2.38138	2.41206	2.71982
		1.25	2.69173	2.54795	2.93148	2.87741		1.25	2.39385	2.72988	3.01333	3.00681
		1.5	2.78447	2.72769	3.29571	2.88614		1.5	2.43849	2.90868	3.31023	3.04969
		1.75	2.69004	2.91649	3.37484	2.82296		1.75	2.39706	3.03238	3.29954	2.95916
		2	2.49175	2.96125	3.15061	2.72966		2	2.31826	3.15061	3.11423	2.81005
		2.25	2.3783	3.0369	2.91977	2.6412		2.25	2.24753	3.20441	3.02461	2.81677
		2.5	2.28294	3.07441	2.78733	2.54265		2.5	2.2291	3.14503	2.92949	2.72872
		2.75	2.17234	2.93056	2.90813	2.47505		2.75	2.15009	3.14669	2.71454	2.57033
		3	2.13027	2.86098	3.04755	2.40019		3	2.11403	3.11549	2.5815	2.44719
		3.25	2.11509	2.85203	2.8688	2.3501		3.25	2.14658	3.00834	2.57061	2.41029
		3.5	2.06209	2.81069	2.64474	2.29291		3.5	2.11909	2.88937	2.63882	2.34632
		3.75	1.95274	2.72921	2.48882	2.3051		3.75	2.02914	2.6878	2.49828	2.30667
		4	1.80301	2.54814	2.32322	2.32495		4	1.93389	2.4809	2.28478	2.33565
		4.25	1.72389	2.32855	2.12914	2.25538		4.25	1.79784	2.33419	2.12668	2.3134
		4.5	1.67736	2.19907	2.00529	2.18452		4.5	1.71897	2.16178	1.94988	2.26458
		4.75	1.66756	2.05577	1.93322	2.12061		4.75	1.69369	2.05074	1.83712	2.14855
		5	1.66865	1.92109	1.83393	2.03822		5	1.66683	1.91237	1.78403	2.12529
		5.25	1.62398	1.85048	1.80287	2.03126		5.25	1.65761	1.76481	1.78441	2.07536
		5.5	1.60046	1.78181	1.77326	1.98888		5.5	1.61413	1.66744	1.75869	1.99569
		5.75	1.57576	1.72573	1.73661	1.9827		5.75	1.60014	1.62273	1.70739	2.01738
		6	1.58892	1.66747	1.73806	1.9476		6	1.579	1.58384	1.64224	1.9775
		6.25	1.6168	1.7028	1.68809	1.93107		6.25	1.59319	1.53774	1.59027	1.9936
		6.5	1.65064	1.68565	1.62645	1.93102		6.5	1.58488	1.50037	1.61867	1.95673
		6.75	1.60619	1.6235	1.62437	1.86282		6.75	1.54824	1.49027	1.60806	1.93295
		7	1.52832	1.6141	1.57242	1.75394		7	1.47099	1.45785	1.50652	1.90341
		7.25	1.48561	1.55281	1.48437	1.64042		7.25	1.48257	1.40362	1.46882	1.78035
		7.5	1.41979	1.49833	1.39508	1.57154		7.5	1.4658	1.37252	1.39602	1.67569
		7.75	1.36603	1.48267	1.36851	1.47922		7.75	1.46874	1.33768	1.31986	1.5756
		8	1.35088	1.44169	1.31808	1.45416		8	1.47262	1.29272	1.29428	1.49705
		8.25	1.33748	1.39752	1.24782	1.37295		8.25	1.39763	1.28682	1.20962	1.39912
		8.5	1.28264	1.32636	1.2032	1.28116		8.5	1.35297	1.25369	1.18862	1.32826
		8.75	1.25889	1.27777	1.16052	1.23552		8.75	1.31633	1.18899	1.17048	1.27147
		9	1.21492	1.23324	1.15972	1.18746		9	1.276	1.1581	1.15202	1.22183
		9.25	1.17454	1.17714	1.09164	1.10165		9.25	1.24474	1.09503	1.08654	1.18389
		9.5	1.11465	1.10861	1.05591	1.06447		9.5	1.20868	1.05416	1.04731	1.10582
		9.75	1.08067	1.06539	1.0464	1.03544		9.75	1.18865	1.01947	1.03021	1.05013
		10	1.03197	1.01346	1.00113	0.972815		10	1.16574	0.97668	1.03266	1.0136
		10.25	0.981134	0.974801	0.952265	0.940825		10.25	1.14973	0.938775	0.995186	0.965498
		10.5	0.970216	0.89943	0.911639	0.937498		10.5	1.13742	0.909178	0.949188	0.937236
		10.75	0.973837	0.860118	0.863294	0.911869		10.75	1.11116	0.85876	0.920131	0.911409
		11	0.901199	0.840883	0.831218	0.849867		11	1.03981	0.823682	0.89866	0.870355
		11.25	0.873196	0.795591	0.812171	0.830783		11.25	0.999774	0.784675	0.839542	0.847129
		11.5	0.855947	0.74601	0.779103	0.810836		11.5	0.964202	0.750468	0.77294	0.820659
		11.75	0.80841	0.71531	0.735223	0.769045		11.75	0.968079	0.71191	0.738045	0.763618
		12	0.774082	0.694465	0.693576	0.738361		12	0.934232	0.689527	0.735948	0.721633
		12.25	0.782939	0.662265	0.673648	0.683783		12.25	0.884678	0.648638	0.721944	0.67013
		12.5	0.757928	0.633363	0.660561	0.644292		12.5	0.854366	0.612373	0.700729	0.639036
		12.75	0.731124	0.60559	0.622981	0.601575		12.75	0.818556	0.590087	0.664084	0.613038
		13	0.703148	0.584586	0.609657	0.557581		13	0.824157	0.56846	0.63822	0.575444
		13.25	0.67923	0.554555	0.594129	0.54096		13.25	0.79805	0.552327	0.631364	0.537995
		13.5	0.642775	0.528893	0.57123	0.505434		13.5	0.761209	0.529669	0.616554	0.497726
		13.75	0.621684	0.511047	0.5531	0.467809		13.75	0.729587	0.511486	0.599166	0.452452
		14	0.592049	0.487676	0.530911	0.424276		14	0.703433	0.504809	0.580193	0.418483
		14.25	0.57279	0.470318	0.503122	0.398573		14.25	0.670606	0.4753	0.561773	0.393734
		14.5	0.551469	0.453337	0.484169	0.372233		14.5	0.628562	0.453202	0.536718	0.363772
		14.75	0.515845	0.440163	0.470392	0.353474		14.75	0.59036	0.437397	0.510387	0.353248
		15	0.482115	0.416935	0.45371	0.329685		15	0.562237	0.41545	0.495826	0.33049
		15.25	0.450141	0.399705	0.425867	0.300567		15.25	0.531022	0.403162	0.469591	0.305808
		15.5	0.439841	0.379542	0.410802	0.287261		15.5	0.505764	0.389867	0.475618	0.2862
		15.75	0.432206	0.359309	0.4008	0.275494		15.75	0.4815	0.371662	0.450049	0.272954
		16	0.414762	0.351182	0.384579	0.2584		16	0.461794	0.345698	0.432682	0.261495
		16.25	0.391204	0.33843	0.368874	0.238098		16.25	0.437241	0.330224	0.409885	0.240654
		16.5	0.373168	0.326321	0.353603	0.229503		16.5	0.414261	0.326493	0.385658	0.22602
		16.75	0.362211	0.316707	0.336146	0.222993		16.75	0.39783	0.320959	0.38207	0.219158
		17	0.348346	0.307231	0.324122	0.21327		17	0.381224	0.309726	0.364152	0.208388
		17.25	0.332778	0.295996	0.309887	0.19967		17.25	0.369815	0.300262	0.359256	0.196813
		17.5	0.320397	0.284093	0.307629	0.193519		17.5	0.352361	0.28743	0.338478	0.189707
		17.75	0.31045	0.274174	0.300649	0.179725		17.75	0.347467	0.270132	0.327958	0.180977
		18	0.300555	0.266716	0.282757	0.170584		18	0.333721	0.269127	0.325225	0.172662
		18.25	0.28446	0.258722	0.267716	0.165053		18.25	0.317015	0.264528	0.301659	0.164943
		18.5	0.285591	0.253248	0.273006	0.164444		18.5	0.30702	0.259043	0.289629	0.161171
		18.75	0.280148	0.245516	0.269097	0.160127		18.75	0.302718	0.249133	0.290385	0.157931
		19	0.272491	0.24372	0.257571	0.148819		19	0.305651	0.244973	0.284696	0.149205
		19.25	0.262777	0.241356	0.252662	0.141624		19.25	0.294595	0.240124	0.283529	0.140488
		19.5	0.259887	0.239555	0.246599	0.136718		19.5	0.29346	0.23517	0.271274	0.135344
		19.75	0.253408	0.235916	0.240151	0.131862		19.75	0.280267	0.225554	0.268883	0.129135
		20	0.246001	0.230608	0.236366	0.127513		20	0.270572	0.226618	0.258652	0.126275
		20.25	0.239014	0.230481	0.231695	0.122397		20.25	0.272539	0.22227	0.257586	0.123652
		20.5	0.23549	0.22416	0.22705	0.116787		20.5	0.272372	0.219818	0.254218	0.116118
		20.75	0.235002	0.223267	0.232748	0.112908		20.75	0.265348	0.21449	0.254157	0.112311
		21	0.232769	0.218087	0.231655	0.106715		21	0.254624	0.20877	0.243942	0.109465
		21.25	0.23035	0.213265	0.22043	0.105074		21.25	0.252948	0.206986	0.223442	0.108713
		21.5	0.222973	0.212959	0.212781	0.099699		21.5	0.245308	0.205791	0.218383	0.101339
		21.75	0.223932	0.206693	0.209084	0.09385		21.75	0.245103	0.207392	0.220707	0.09796
		22	0.21483	0.206416	0.199499	0.092734		22	0.246954	0.202812	0.208799	0.094423
		22.25	0.215827	0.209327	0.195888	0.088316		22.25	0.249447	0.201771	0.200163	0.089212
		22.5	0.209241	0.199918	0.194075	0.084275		22.5	0.243552	0.197158	0.202722	0.085293
		22.75	0.20638	0.200845	0.195388	0.082354		22.75	0.247837	0.193117	0.200762	0.083763
		23	0.204684	0.196313	0.194297	0.076589		23	0.244551	0.197146	0.195693	0.081936
		23.25	0.197963	0.193581	0.186945	0.074425		23.25	0.239658	0.195653	0.191952	0.075621
		23.5	0.199119	0.195396	0.185015	0.071807		23.5	0.231363	0.19211	0.187157	0.073204
		23.75	0.199225	0.195078	0.177403	0.068652		23.75	0.22742	0.185144	0.182124	0.070051
		24	0.195426	0.189805	0.172493	0.064866		24	0.226209	0.183992	0.180081	0.066781
		24.25	0.193785	0.183528	0.170118	0.063604		24.25	0.231108	0.184669	0.174334	0.064602
		24.5	0.188323	0.183475	0.161495	0.059966		24.5	0.223323	0.18218	0.174068	0.060857
		24.75	0.189169	0.18249	0.162548	0.057215		24.75	0.218558	0.181659	0.168004	0.057003
