# Supplementary material for: Dysfunctions of the paraventricular hypothalamic nucleus induce hypersomnia in mice
Source: eLife. 2021 Nov 17;10:e69909. doi: 10.7554/eLife.69909 (PMC8631797; doi:10.7554/eLife.69909)
Supplement: Figure 3—source data 2. [file elife-69909-fig3-data2.xlsx]

## Sheet: Sheet1
Figure supplement 3
	n=4
		n=6	CNO	NREM sleep				CNO	Wake
		19:00:00	2.46	3.18	13.32	3.84		19:00:00	56.64	56.82	46.68	57.96
		20:00:00	15.84	3	6	4.8		20:00:00	42.6	57	54	55.2
		21:00:00	16.14	3.36	10.14	18.84		21:00:00	42.78	56.64	48.84	36.96
		22:00:00	19.2	8.04	8.94	4.44		22:00:00	38.52	51.96	51.06	55.56
		23:00:00	0	20.34	11.04	14.76		23:00:00	59.94	39.6	48.96	40.86
		1900-01-01	0	3	17.52	17.4		1900-01-01	60	57	42.48	40.56
		1900-01-01 01:00:00	24.84	21.66	20.52	3.06		1900-01-01 01:00:00	33.24	38.34	38.46	56.94
		1900-01-01 02:00:00	14.94	33.06	13.74	7.2		1900-01-01 02:00:00	41.58	26.88	42.36	49.92
		1900-01-01 03:00:00	17.94	23.52	8.46	21.06		1900-01-01 03:00:00	39.72	36.48	48.72	35.16
		1900-01-01 04:00:00	26.28	12.24	2.58	18.18		1900-01-01 04:00:00	31.14	47.76	55.98	38.04
		1900-01-01 05:00:00	7.98	0.18	13.2	10.26		1900-01-01 05:00:00	52.02	59.82	46.8	46.98
		1900-01-01 06:00:00	10.68	6	21.6	6.12		1900-01-01 06:00:00	49.32	54	34.74	53.82
		1900-01-01 07:00:00	38.58	14.4	27.42	11.64		1900-01-01 07:00:00	15.54	45.6	25.02	45
		1900-01-01 08:00:00	48	43.26	36.36	29.16		1900-01-01 08:00:00	5.22	8.28	19.44	25.8
		1900-01-01 09:00:00	15.96	17.4	40.86	35.16		1900-01-01 09:00:00	40.38	40.98	11.46	22.26
		1900-01-01 10:00:00	44.58	44.4	39.66	20.94		1900-01-01 10:00:00	7.08	8.82	11.82	33.18
		1900-01-01 11:00:00	31.62	36.24	35.22	22.86		1900-01-01 11:00:00	23.76	15.96	14.88	30.06
		1900-01-01 12:00:00	43.32	48.3	40.86	22.86		1900-01-01 12:00:00	9.96	4.32	9.36	29.58
		1900-01-01 13:00:00	22.62	38.34	39.6	22.68		1900-01-01 13:00:00	34.08	18.06	12.96	35.88
		1900-01-01 14:00:00	47.58	46.02	23.82	22.68		1900-01-01 14:00:00	6.96	5.88	29.94	29.4
		1900-01-01 15:00:00	20.16	30.66	39.84	37.74		1900-01-01 15:00:00	35.04	23.04	13.92	11.4
		1900-01-01 16:00:00	34.2	39.78	37.56	25.62		1900-01-01 16:00:00	20.34	13.68	13.14	29.04
		1900-01-01 17:00:00	30.18	28.26	33.36	21.72		1900-01-01 17:00:00	22.14	25.68	23.22	34.02
		1900-01-01 18:00:00	12.12	29.16	28.26	20.16		1900-01-01 18:00:00	45.72	27	25.62	36.06
			Vehicle						Vehicle
		19:00:00	1.08	11.94	6	13.32		19:00:00	58.92	44.64	54	45.78
		20:00:00	0.6	16.44	4.86	8.76		20:00:00	59.4	39.6	55.14	48.96
		21:00:00	3.54	0	0.84	0		21:00:00	56.46	60	59.16	60
		22:00:00	3.72	4.02	3.42	0.06		22:00:00	56.28	55.68	55.92	59.58
		23:00:00	5.94	1.8	4.2	0.42		23:00:00	54	58.2	54.54	59.46
		1900-01-01	1.56	9	7.86	0.18		1900-01-01	58.44	51.6	52.14	59.82
		1900-01-01 01:00:00	13.14	11.16	10.2	2.28		1900-01-01 01:00:00	43.56	48.84	46.2	57.54
		1900-01-01 02:00:00	15.18	13.68	0.06	3.24		1900-01-01 02:00:00	40.98	46.32	59.94	55.74
		1900-01-01 03:00:00	16.74	23.58	11.04	6.24		1900-01-01 03:00:00	38.34	36.42	44.28	52.74
		1900-01-01 04:00:00	17.04	27.24	12.18	8.4		1900-01-01 04:00:00	42.96	32.76	42.42	51.42
		1900-01-01 05:00:00	10.74	28.56	16.44	13.44		1900-01-01 05:00:00	46.08	29.52	43.56	46.02
		1900-01-01 06:00:00	1.92	21.96	29.04	12.42		1900-01-01 06:00:00	56.76	38.04	28.92	46.74
		1900-01-01 07:00:00	19.44	10.38	27.24	11.82		1900-01-01 07:00:00	37.2	49.62	30.72	48.18
		1900-01-01 08:00:00	34.92	22.02	47.88	41.58		1900-01-01 08:00:00	18	34.98	5.22	17.76
		1900-01-01 09:00:00	17.22	27.06	27.66	39.78		1900-01-01 09:00:00	40.08	30.06	25.62	13.56
		1900-01-01 10:00:00	34.92	18.42	43.8	42.36		1900-01-01 10:00:00	20.22	35.58	9.48	13.38
		1900-01-01 11:00:00	32.64	23.58	47.58	35.4		1900-01-01 11:00:00	19.56	30.42	1.86	16.8
		1900-01-01 12:00:00	31.08	26.94	26.64	43.56		1900-01-01 12:00:00	23.22	23.28	28.62	11.58
		1900-01-01 13:00:00	43.2	29.22	50.04	40.26		1900-01-01 13:00:00	10.8	26.76	1.86	17.28
		1900-01-01 14:00:00	32.22	25.2	26.16	40.14		1900-01-01 14:00:00	22.2	28.56	29.34	15.96
		1900-01-01 15:00:00	42.06	33.36	46.68	31.62		1900-01-01 15:00:00	11.22	18.48	7.08	22.86
		1900-01-01 16:00:00	27	21.78	35.58	32.28		1900-01-01 16:00:00	27.18	32.76	18.36	24.36
		1900-01-01 17:00:00	31.68	26.88	39	42.84		1900-01-01 17:00:00	23.28	31.8	13.74	13.08
		1900-01-01 18:00:00	23.22	24.48	34.68	25.68		1900-01-01 18:00:00	33.72	32.52	19.68	34.2
