# Supplementary material for: Dysfunctions of the paraventricular hypothalamic nucleus induce hypersomnia in mice
Source: eLife. 2021 Nov 17;10:e69909. doi: 10.7554/eLife.69909 (PMC8631797; doi:10.7554/eLife.69909)
Supplement: Figure 3—source data 3. [file elife-69909-fig3-data3.xlsx]

## Sheet: Hormone
CRF	Vehicle 1#	Vehicle 2#	Vehicle 3#	Vehicle 4#	Vehicle 5#	CNO 1#	CNO 2#	CNO 3#	CNO 4#	CNO 5#
2 h	25.64	25.59	24.94	26.28		28.17	28	28.23	28.52
3 h	25.12	23.28	25.36	23.89	25.74	31.16	25.31	30.41	27.55	25.74
4 h	25.08	24.71	25.15	26.28	25.22	26.43	29.56	28.52	26.79	26.79
CORT	Vehicle 1#	Vehicle 2#	Vehicle 3#	Vehicle 4#	Vehicle 5#	CNO 1#	CNO 2#	CNO 3#	CNO 4#	CNO 5#
2 h	48.56	62.98	54.94	83.4		37.94	54.69	71.35	77.02
3 h	44.78	54.12	81.14	66.32		161.39	121.31	160.1	94.55
4 h	44.13	73.3	50.56	64.27	55.2	89.51	59.34	49.88	105.29	81.5

## Sheet: Heart rate
time	Vehicle					CNO (3 mg/kg)
	761.079	704.178	714.286	533.962	732.237	683.99	461.73	674.046	719.948	739.077
	784.618	704.529	705.397	624.018	726.668	693.255	443.563	629.427	714.085	748.986
	779.221	676.53	704.924	626.305	755.352	695.821	435.681	653.459	728.047	738.174
	773.572	651.977	704.048	487.426	744.859	675.212	426.868	621.829	728.718	745.23
	769.809	685.231	574.569	489.335	746.452	670.781	427.133	636.815	721.992	731.339
	769.924	712.549	518.773	478.723	752.21	665.683	424.947	656.132	736.072	729.155
	768.379	716.074	607.348	492.749	730.208	661.665	444.053	653.261	729.361	699.261
	763.28	712.534	716.921	465.14	758.706	700.809	438.512	693.939	718.737	725.329
	765.789	712.633	545.512	481.702	751.991	701.471	449.006	692.225	721.744	728.416
	735.46	679.657	707.786	464.5	742.727	642.944	481.365	691.922	719.361	716.826
	732.596	693.642	709.885	478.715	739.354	623.864	479.387	678.022	718.216	718.217
	735.621	715.185	723.83	579.052	726.573	615.725	464.882	667.712	714.485	706.021
	730.886	704.724	725.316	620.594	738.099	620.124	464.387	679.012	709.212	679.498
	762.25	719.301	723.944	632.535	747.268	603.915	465.092	652.867	707.853	702.692
	740.871	512.061	716.499	639.692	744.649	600.096	449.369	684.297	709.043	721.831
	716.336	715.941	703.509	648.19	729.549	588.929	455.041	657.013	682.668	664.938
	718.188	708.424	527.507	659.574	738.598	584.084	457.473	657.377	676.209	706.385
	709.016	697.577	719.561	647.238	721.486	590.871	469.484	665.485	682.321	677.948
	724.385	687.865	715.179	699.83	707.313	576.834	507.779	643.209	684.18	680.634
	707.028	695.977	539.277	698.772	694.695	569.036	521.686	658.302	685.466	647.641
	726.88	666.128	712.939	646.798	676.249	582.916	526.636	700.784	679.685	610.205
	731.011	691.789	719.622	623.145	726.182	646.925	506.829	708.831	661.391	604.826
	726.279	677.646	553.908	565.646	652.864	600.724	517.528	718.397	661.602	685.326
	726.528	704.187	710.088	521.269	698.573	554.09	523.476	699.771	665.661	674.984
	725.641	658.743	721.311	505.975	653.462	559.455	537.477	686.071	661.693	686.359
	699.022	692.63	722.595	515.807	571.602	565.239	580.635	658.84	667.96	671.218
	696.912	680.373	730.363	500.206	574.133	621.777	561.71	704.161	649.509	619.621
	732.317	683.769	723.119	486.051	579.549	662.023	597.294	669.298	731.94	690.052
	746.428	700.401	721.997	479.287	620.46	620.195	601.906	670.442	735.712	684.498
	755.667	691.853	724.577	474.552	601.724	608.839	561.809	672.909	708.648	674.009
	759.218	686.756	721.888	484.051	558.575	630.048	595.618	700.627	664.758	649.183
	757.776	680.279	717.938	476.314	531.161	619.632	552.036	697.068	681.497	650.492
	759.044	669.291	711.606	457.368	545.174	631.322	569.81	702.065	719.099	689.276
	756.053	662.565	720.239	468.994	534.198	632.656	544.658	699.543	681.782	699.537
	763.246	657.57	720.768	451.198	596.954	643.92	545.813	699.33	695.766	668.585
	764.974	678.514	717.932	502.323	525.627	652.174	524.985	693.519	721.036	614.544
	756.691	686.749	718.145	461.844	522.982	673.816	518.895	695.501	731.176	613.842
	757.128	648.878	728.388	462.309	526.77	668.828	518.922	685.79	718.934	635.475
	755.337	662.766	729.585	456.019	507.374	633.014	528.956	680.456	708.459	598.609
	751.061	651.345	731.25	471.763	560.804	659.808	507.239	684.044	729.119	595.771
	761.114	644.589	735.163	529.737	522.32	726.656	525.405	686.7	692.955	608.434
	753.743	653.992	730.841	468.581	628.288	718.524	576.601	677.817	697.479	591.506
	760.684	684.841	721.747	472.565	525.463	709.648	547.686	663.001	738.301	663.891
	761.826	669.156	726.47	462.163	526.586	726.939	616.631	653.173	741.163	683.363
	762.693	650.061	733.611	456.696	588.116	706.31	642.138	706.818	736.54	691.917
	766.579	634.569	739.773	468.267	660.015	701.45	545.014	730.295	719.95	661.798
	765.889	708.294	735.528	466.387	577.478	681.75	577.785	726.415	735.597	637.5
	766.004	721.036	733.567	601.093	575.612	676.509	641.16	747.514	735.967	597.03
	755.699	726.26	724.959	615.862	598.883	679.851	494.667	744.325	728.103	647.526
	753.664	726.5	736.781	499.748	591.312	690.572	672.484	773.212	727.989	651.293
	749.064	716.869	714.046	460.118	707.749	689.238	668.261	776.291	715.129	665.532
	746.774	684.226	728.004	528.078	774.853	700	522.011	744.698	724.243	637.755
	751.809	706.986	719.092	569.444	768.708	696.366	678.108	703.84	687.606	642.478
	742.674	705.266	721.463	545.834	738.916	724.975	531.898	647.427	675.572	671.607
	734.031	684.055	712.805	532.178	708.945	717.719	529.314	688.986	677.914	651.697
	744.196	645.01	710.526	516.978	655.789	725.144	687.929	766.189	690.37	622.604
	765.519	618.524	726.753	497.288	687.503	722.892	677.88	701.259	691.315	606.061
	776.267	666.949	725.279	673.631	637.506	735.318	678.751	730.897	740.192	664.475
	756.121	631.611	722.772	683.582	606.901	722.782	682.464	678.293	655.654	531.365
	738.408	614.146	709.01	681.741	688.885	718.344	691.346	693.105	653.73	641.082
	740.614	696.864	529.559	629.598	628.16	730.823	693.477	643.29	702.346	687.088
	737.333	540.16	702.859	679.781	583.295	709.651	688.638	671.324	677.251	727.303
	587.127	697.79	700.704	667.885	584.032	677.966	685.21	692.471	684.219	661.448
	733.229	663.338	710.104	666.032	648.303	673.886	683.525	690.863	701.044	703.208
	731.933	706.54	706.718	699.549	656.455	670.408	693.377	707.395	670.99	679.047
	736.672	686.255	718.297	703.214	652.24	675.655	679.155	702.031	694.251	674.337
	722.186	703.349	716.083	681.323	574.961	662.499	676.59	773.08	728.884	679.793
	716.407	699.894	721.451	668.096	572.537	638.904	674.657	742.591	679.138	701.678
	729.396	713.242	724.807	686.186	578.211	684.099	676.078	689.467	679.682	720.52
	739.766	707.701	718.675	666.325	580.994	626.893	669.635	663.1	651.524	714.362
	725.53	711.675	559.557	693.362	569.591	628.462	679.102	653.917	672.954	710.352
	695.714	671.368	731.661	684.387	653.926	622.984	687.756	637.229	671.857	690.973
	734.312	667.888	730.341	688.503	613.466	634.712	677.771	618.713	707.3	722.892
	747.261	692.02	729.536	682.272	648.516	647.112	668.915	630.668	747.781	717.695
	755.639	710.647	711.249	659.607	630.516	621.652	516.844	648.237	718.939	716.304
	755.349	677.988	518.465	690.307	609.122	628.193	685.45	643.44	716.38	708.191
	766.537	678.962	592.992	703.165	614.98	614.324	598.027	600.685	695.134	668.37
	766.67	707.039	725.302	667.374	597.691	639.01	524.031	617.297	702.546	654.839
	749.809	654.429	733.468	660.344	645.602	620.304	492.879	688.159	713.408	613.788
	757.288	641.348	715.373	653.4	678.02	633.846	593.041	585.231	692.971	633.849
	757.767	663.974	724.301	661.107	722.78	643.562	515.646	583.232	706.313	701.044
	765.776	655.129	728.025	649.732	709.932	626.292	540.842	622.014	674.821	678.325
	762.491	601.037	731.188	663.717	685.909	626.103	495.616	585.228	680.649	718.792
	760.546	635.826	732.442	727.126	666.558	654.737	496.894	605.541	665.559	699.106
	762.108	649.92	724.751	730.099	727.503	686.603	498.077	596.742	654.318	733.805
	762.373	591.313	720.383	505.509	711.038	661.542	523.978	576.628	671.96	726.837
	759.352	658.566	726.802	714.286	661.542	624.684	508.268	581.544	657.526	703.248
	765.603	614.729	694.75	705.882	645.338	629.736	522.527	649.397	661.218	704.682
	767.663	575.949	693.586	702.249	631.739	694.842	512.018	571.488	664.721	709.121
	769.031	623.767	688.455	697.635	624.825	703.342	499.413	581.29	634.551	684.836
	767.19	628.198	673.744	687.377	677.419	679.622	488.157	590.113	604.325	701.884
	769.46	625.886	671.96	672.632	725.162	676.013	522.161	577.825	633.078	697.711
	589.666	609.717	671.536	691.896	684.779	675.416	495.353	568.778	646.796	698.694
	769.971	620.393	648.583	708.635	649.159	678.087	489.557	580.606	637.571	692.905
	758.863	645.128	696.512	690.665	648.04	661.809	487.559	613.019	617.923	676.68
	760.123	629.04	680.998	683.637	623.132	661.665	479.258	597.165	656.504	681.748
	753.339	626.332	654.63	707.02	600.732	648.318	476.479	629.04	680.511	676.812
	749.579	648.929	672.419	702.392	630.162	644.114	520.739	625.157	640.303	675.969
	751.769	633.803	668.321	719.782	676.047	677.337	506.803	619.306	618.882	697.024
	740.588	668.713	646.809	712.524	657.177	666.391	484.141	639.561	668.263	680.435
	738.368	638.427	632.485	728.091	670.29	678.509	473.676	613.88	702.464	669.733
	737.24	575.6	626.227	722.142	658.407	675.583	488.354	670.781	698.632	712.84
	716.497	573.754	622.38	714.826	720.048	671.188	474.885	639.761	658.821	719.323
	742.796	570.99	638.91	724.066	716.389	669.418	464.639	650.028	601.649	717.816
	744.536	653.049	694.194	724.183	722.074	669.677	465.848	643.44	693.586	701.31
	732.224	710.078	651.23	699.346	745.573	685.61	458.253	646.784	645.054	714.117
	720.23	692.569	634.708	720.367	734.99	689.305	455.735	638.264	672.527	725.319
	712.229	660.59	660.724	722.637	743.157	703.125	454.153	671.666	664.663	724.638
	711.841	557.446	644.435	721.228	749.868	592.46	449.139	659.973	699.549	720.826
	698.549	508.58	650.476	729.814	753.432	796.791	461.235	675.825	679.833	718.997
	695.88	676.159	682.91	720.582	719.988	777.385	478.44	681.577	695.572	712.13
	704.189	666.565	653.521	723.378	729.694	771.127	484.116	675.928	707.162	719.923
	717.428	630.758	645.98	724.111	747.519	766.55	545.954	680.782	701.848	726.6
	748.165	516.796	628.408	720.995	745.997	761.893	573.753	683.761	681.135	700.128
	727.292	466.478	643.366	713.537	747.372	759.389	504.673	663.492	691.662	738.243
	751.524	580.705	642.533	698.668	746.038	757.84	644.871	716.68	690.182	730.789
	744.197	559.804	622.947	702.151	753.192	767.868	631.438	705.011	691.753	738.045
	732.778	554.742	627.427	652.846	742.687	768.581	538.904	705.882	696.186	732.947
	730.119	474.684	693.267	708.404	751.335	768.785	498.942	670.319	688.835	730.796
	719.4	494.089	659.447	644.468	750.772	772.456	447.693	725.293	708.963	725.568
	714.756	588.205	692.636	680.679	760.215	767.16	463.726	746.388	671.91	708.316
	712.301	571.342	669.701	720.621	762.478	775.344	465.397	739.678	693.08	696.388
	720.757	687.568	680.945	728.714	760.643	768.234	453.172	720.562	662.514	669.043
	708.554	568.69	718.41	727.63	757.856	764.861	452.83	723.384	661.729	667.927
	743.543	465.515	673.041	731.707	751.559	760.888	445.252	741.151	663.406	652.951
	757.764	516.874	673.952	733.242	752.31	761.841	437.142	752.038	705.698	652.676
	752.194	594.028	629.809	729.036	750.782	758.465	436.923	749.684	723.136	672.184
	744.157	640.306	632.924	731.624	758.471	762.677	436.617	752.531	716.558	691.806
	735.808	573.039	626.898	723.263	756.674	754.902	519.231	748.599	729.773	680.516
	731.446	481.162	617.411	722.14	757.462	756.992	475.802	741.198	736.498	685.572
	711.687	460.816	595.986	696.362	747.871	769.392	506.422	708.171	737.453	685.13
	715.976	553.818	669.266	721.171	753.307	771.285	515.073	691.634	722.267	698.925
	728.376	504.536	622.181	701.955	737.987	756.317	456.389	705.92	743.527	687.74
	720.554	554.798	618.62	709.465	738.956	766.763	451.857	702.547	734.533	688.124
	721.941	468.56	598.877	724.459	746.399	765.927	454.201	739.239	732.642	688.22
	745.166	468.75	630.677	703.557	690.481	755.374	453.232	736.818	733.957	680.399
	733.778	539.707	643.301	685.144	730.565	767.399	453.005	740.182	731.748	681.572
	721.741	653.033	594.636	629.535	735.524	758.251	492.976	740.25	728.514	682.977
	720.396	476.821	566.521	614.748	739.712	762.415	508.864	738.803	724.069	679.905
	714.43	525.945	563.524	590.091	723.739	750.391	580.904	739.085	732.265	701.083
	731.859	587.706	601.534	601.604	738.909	759.111	438.773	740.66	737.418	687.776
	719.512	547.917	567.211	622.335	744.072	756.141	431.196	729.161	743.771	667.766
	715.802	448.711	555.891	591.788	761.646	750.646	428.224	734.036	743.895	668.212
	699.294	476.554	677.794	578.321	745.205	749.044	441.515	736.484	750.457	674.667
	693.536	458.502	673.018	599.656	720.013	749.194	442.532	736.259	733.547	662.178
	716.344	453.686	613.027	567.665	724.858	749.239	441.537	744.319	723.747	696.485
	746.427	498.556	513.994	573.982	727.947	746.445	447.194	734.365	735.429	705.995
	719.178	471.655	512.665	572.441	745.505	762.385	451.724	742.044	755.679	642.673
	719.926	470.029	522.849	575.913	695.52	735.611	455.495	740.444	747.276	643.991
	726.172	570.508	602.521	549.37	743.078	740.582	472.274	727.772	748.337	531.841
	732.005	579.867	539.978	577.5	691.211	740.252	510.587	721.443	748.643	633.838
	721.576	476.263	563.48	596.983	761.051	731.633	535.288	723.467	723.182	665.164
	708.986	454.064	538.034	538.913	702.038	728.473	492.576	737.844	735.818	687.167
	706.956	492.871	582.083	531.61	709.373	731.044	620.351	734.407	752.115	682.471
	690.599	689.002	526.583	534.134	730.288	726.876	641.862	728.745	748.108	701.715
	684.225	695.322	540.814	516.075	743.802	728.666	648.49	750.341	742.433	709.396
	683.985	664.904	565.006	567.679	732.99	720.663	660.933	728.922	727.09	677.45
	683.124	610.955	597.907	513.946	698.589	728.021	663.906	746.138	742.667	714.393
	702.921	660.196	608.57	516.258	696.599	719.742	669.169	735.488	743.438	705.882
	719.235	692.308	605.615	557.982	753.285	730.196	672.451	727.375	737.944	683.752
	716.987	705.174	618.493	507.792	759.542	736.377	678.945	722.468	738.125	662.098
	717.703	700.429	610.577	488.027	728.565	721.03	685.262	681.069	742.591	630.813
	698.272	703.906	578.667	538.797	759.08	729.172	683.882	665.476	729.927	642.068
	685.541	707.418	557.685	643.223	757.321	755.799	684.907	686.862	691.943	624.968
	720.647	696.897	678.539	665.988	748.036	759.494	690.596	720.33	703.955	619.148
	683.348	707.6	678.877	659.64	745.534	714.616	690.823	727.988	679.765	685.361
	673.452	710.766	650.502	654.226	751.062	747.956	694.026	694.039	696.248	710.514
	674.633	711.412	622.849	656.11	745.585	741.504	694.596	700.524	686.617	670.766
	680.782	709.406	613.888	664.207	739.721	754.854	699.698	703.174	681.923	646.025
	695.324	713.198	615.212	693.624	743.208	747.174	701.299	714.928	661.569	636.653
	682.259	720.554	625.728	709.823	751.49	746.767	703.609	706.88	721.492	624.937
	657.277	699.424	621.149	656.668	762.757	732.582	702.804	707.827	702.626	654.22
	676.252	709.862	657.421	636.421	753.739	725.522	704.12	712.954	677.846	644.348
	661.494	708.992	640.461	567.853	754.407	777.27	696.136	708.067	677.949	672.879
	662.599	710.945	634.009	578.87	716.967	762.481	702.025	694.123	677.398	650.103
	680.272	724.024	686.57	573.14	746.512	767.359	702.265	728.732	659.577	685.283
	645.914	710.89	704.381	526.883	714.398	752.877	684.027	713.993	652.789	687.715
	691.216	676.98	691.413	532.903	751.277	743.221	682.639	720.455	712.902	694.708
	670.747	697.042	638.836	512.587	749.921	749.648	682.598	723.051	721.639	691.244
	707.399	523.022	597.109	514.58	748.95	758.091	716.647	734.284	696.741	719.212
	784.902	684.989	623.97	313.977	736.976	698.45	719.215	779.743	743.68	756.219
	793.174	331.835	559.77	329.24	735.058	745.091	720.477	799.585	787.859	757.827
	368.098	647.69	556.795	361.096	724.652	738.739	444.951	393.043	779.221	752.8
	782.036	685.714	563.933	409.675	728.279	730.23	724.785	796.211	789.474	750
	771.832	559.931	571.371	397.521	721.54	733.151	514.447	789.474	789.474	748.147
	770.847	558.213	559.861		732.904	738.03	710.683	784.686	771.812	744.425
	776.333	593.43	556.096	389.821	719.563	728.678	695.173	774.636	773.822	743.153
	775.879	715.206	635.721	313.316	712.516	731.657	700.8	762.553	768.541	742.711
	777.166	690.002	618.945	406.321	725.338	717.677	680.763	774.193	744.071	744.467
	777.3	695.838	554.789	443.538	714.574	716.9	682.013	754.717	725.756	742.959
	777.706	539.395	650.485	439.56	703.878	718.463	565.416	747.337	716.185	746.592
	781.238	545.93	583.881	399.755	714.249	718.743	712.288	776.023	706.32	743.944
	784.618	706.536	587.126	347.714	722.744	710.813	527.688	749.297	704.981	748.321
	793.702	706.748	592.507	370.861	720.899	704.957	712.601	759.665	695.604	750.978
	781.139	692.037	626.624	390.096	713.697	710.576	716.975	762.684	681.465	749.732
	779.221	528.908	598.966	434.333	695.385	711.679	728.308	760.629	680.794	755.685
	777.834	678.45	596.397	376.48	702.686	714.873	711.117	779.176	682.951	755.186
	777.013	703.108	627.178	374.081	694.483	719.839	707.492	771.607	663.257	754.837
	777.531	666.494	571.225	398.151	691.84	721.29	700.226	742.996	629.713	755.776
	773.052	679.78	561.826	400.635	678.071	728.223	746.407	746.818	662.312	751.032
	773.349	568.864	586.91	404.737	685.927	720.641	747.748	744.202	650.939	751.298
	772.519	693.642	610.438	388.526	675.41	712.234	631.498	758.203	620.819	762.829
	770.865	712.785	618.147	363.263	703.042	714.797	699.421	738.547	612.278	757.505
	768.592	698.331	612.867	515.343	692.537	710.739	706.742	748.16	651.343	764.137
	772.235	680.469	594.642	548.494	684.049	746.695	699.708	750.814	638.067	760.928
	773.809	655.558	607.634	449.519	678.712	745.483	704.537	740.782	622.707	763.786
	773.797	679.408	610.641		680.478	747.111	685.386	740.741	681.818	586.352
	781.759	704.871	600.915	422.345	675.519	750	670.434	744.025	640.721	757.005
	777.239	659.029	574.992	517.468	681.405	751.712	640.97	724.471	656.68	762.947
	780.208	668.852	634.236	229.008	713.273	746.129	684.127	729.455	642.846	762.258
	783.759	636.556	654.985	399.63	725.536	733.407	684.617	690.177	648.816	764.331
	774.322	639.265	654.053	592.4	720.075	752.993	660.622	671.358	654.822	766.368
	781.182	621.369	665.868	474.59	709.853	736.431	643.643	671.405	665.552	761.916
	776.317	631.13	603.665	431.502	698.084	762.547	643.806	671.743	670.788	758.63
	771.638	612.214	566.125	472.342	698.988	762	666.091	733.415	683.05	745.478
	774.808	545.336	557.678	456.17	690.133	749.345	633.056	723.661	671.23	755.608
	775.845	544.008	568.979	443.051	722.931	745.851	633.885	724.667	675.676	756.347
	768.376	592.105	595.856	449.689	702.838	746.667	668.673	734.531	675.899	763.57
	774.193	616.919	589.203	496.829	710.059	739.22	652.93	743.055	689.297	774.821
	765.345	505.419	580.313	454.222	685.714	751.409	636.792	761.657	691.009	761.864
	776.564	503.919	608.728	440.932	688.56	732.408	627.907	752.799	719.546	751.84
	777.008	509.906	575.031	468.092	691.322	756.048	631.213	739.27	730.099	752.497
	774.947	504.096	620.425	581.975	697.177	752.795	616.758	742.098	721.713	764.838
	773.102	503.766	654.997	655.448	681.712	748.649	651.968	760.189	753.066	776.638
	775.575	564.013	658.065	652.074	692.701	568.634	646.106	766.703	725.698	777.118
	764.185	627.822	607.41	682.235	680.931	765.778	651.692	758.891	757.754	785.444
	752.469	503.081	575.07	681.102	690.549	773.879	661.352	760.26	758.116	779.014
	750.229	491.536	581.671	379.48	684.766	755.086	635.982	757.914	754.219	766.746
	749.962	476.07	587.408		685.576	739.907	693.86	742.846	766.089	785.914
	744.115	512.899	589.124		686.566	746.157	674.002	735.018	763.684	779.671
	736.032	570.034	581.598		698.39	731.782	671.382	764.749	759.217	778.11
	729.419	480.389	602.909	384	694.19	731.67	657.328	755.867	749.802	775.619
	739.618	452.292	618.684	330.381	694.465	704.233	608.86	769.231	746.992	775
	734.42	463.745	610.326	394.218	706.794	724.462	572.75	755.752	721.249	779.916
	728.819	539.613	602.587		750.043	724.133	765.617	740.219	702.261	776.711
	708.447	488.669	587.198		745.261	728.906	755.026	731.707	700.113	773.003
	728.835	500.581	610.18	398.671	725.66	721.285	749.336	726.319	691.705	783.271
	777.856	495.918	593.686	402.93	675.07	698.342	750.26	728.904	691.761	773.02
	768.222	488.644	596.985		685.011	704.066	726.43	736.547	698.87	774.439
	745.361	652.496	622.815		664.706	726.89	701.398	760.135	693.765	773.939
	744.714	502.207	627.304		687.848	727.351	729.442	759.311	691.308	775.494
	732.051	437.89	602.726	406.59	661.174	730.787	712.363	750	713.944	774.388
	736.885	442.961	617.681	349.012	670.408	731.707	747.1	747.631	732.694	778.037
	730.556	457.317	619.211	352.097	670.687	731.3	720.392	753.955	711.641	768.975
	736.658	506.999	619.066	450.783	676.388	744.594	717.906	747.994	703.395	776.368
	734.78	599.483	618.43	504.883	675.565	730.414	735.835	748.182	711.656	773.437
	728.867	661.112	620.406	640.027	691.801	715.772	732.25	745.997	729.226	771.58
	733.982	519.467	589.366	682.231	678.649	710.357	727.95	755.862	732.004	770.903
	732.298	532.871	681.334	371.877	682.649	727.483	728.745	747.386	720.073	770.064
	737.261	624.966	676.26	365.742	684.307	719.549	709.085	747.815	725.882	771.315
	767.902	495.294	641.246	368.747	686.818	707.239	725.358	740.741	743.14	772.192
	751.107	483.969	640.559	435.075	703.482	712.146	738.028	737.569	722.527	768.661
	742.996	469.823	640.417	462.151	690.866	719.557	720.568	738.871	716.543	773.187
	737.679	453.485	625.22	431.023	703.563	715.096	725.338	740.741	711.984	768.15
	736.419	480.074	607.587	346.135	721.708	703.285	709.459	741.957	708.516	767.421
	748.674	474.713	624.81	459.827	717.667	695.253	716.875	746.238	710.598	770.744
	740.216	518.103	611.703	506.158	704.513	702.846	706.819	748.498	709.169	758.465
	745.179	528.824	611.593	415.96	701.098	697.602	701.077	743.427	712.085	736.89
	748.184	677.139	633.237	342.857	724.535	708.769	710.122	744.627	703.803	748.014
	739.888	564.935	637.813	444.053	711.22	704.418	722.743	755.519	707.06	756.38
	732.852	552.176	652.463	654.206	663.956	716.151	704.269	762.699	706.572	779.221
	734.519	674.388	615.587	611.645	670.766	711.22	716.724	757.079	712.769	780.652
	737.634	592.788	627.059	589.944	647.034	711.682	700.725	753.087	710.148	779.024
	744.032	662.928	610.367	653.557	643.569	719.287	721.205	748.701	716.027	769.231
	731.371	560.521	621.163	697.948	641.319	736.353	707.965	750	716.164	769.231
	747.653	523.353	603.061	689.88	699.933	727.126	719.88	750	708.515	769.231
	767.418	440.618	614.308	628.541	705.408	718.425	728.025	750	714.286	767.367
	759.494	430.228	622.486	589.303	691.876	722.598	696.872	751.553	720.449	768.802
	752.728	446.628	614.08	597.965	694.43	711.864	710.413	751.319	740.509	764.539
	746.837	468.726	578.344	716.341	697.523	705.882	688.429	754.832	730.802	769.231
	738.931	465.867	570.397	707.287	719.504	705.847	703.387	754.502	720.075	772.691
	710.67	450.601	548.346	672.208	714.028	701.196	702.359	756.353	712.942	769.231
	722.892	438.245	530.395	694.932	742.937	700.448	705.076	755.135	712.516	766.28
	739.157	456.239	566.735	671.868	737.705	698.413	694.071	760.495	715.938	766.215
	746.207	475.537	633.416	686.788	719.527	704.304	698.078	759.494	714.286	763.662
	746.926	520.371	671.385	696.765	719.398	705.882	684.49	754.337	720.323	769.231
	728.243	459.269	687.054	681.209	712.635	709.015	675.145	747.712	722.377	767.514
	717.652	458.525	692.156	706.183	695.679	724.062	699.844	751.198	743.662	763.095
	714.142	443.975	680.317	704.386	734.298	726.099	708.19	756.534	738.441	762.13
	712.908	441.466	676.851	715.655	709.505	727.44	695.063	772.121	726.703	764.879
	692.924	490.928	686.374	701.029	691.37	715.112	434.677	765.932	719.255	754.925
	696.196	491.953	662.677	700.413	689.443	723.621	687.866	757.608	718.346	760.807
	710.148	444.422	625.699	721.665	705.3	716.588	709.274	768.603	715.637	766.742
	692.331	502.954	574.28	728.308	682.415	718.636	704.237	774.644	713.021	770.676
	685.486	454.637	567.641	719.161	688.853	711.09	610.735	770.446	715.086	764.823
	712.661	460.885	561.065	723.265	716.259	712.835	721.779	759.494	713.602	764.37
	699.153	509.734	546.69	714.823	713.47	713.995	729.797	755.313	697.569	763.116
	677.468	670.159	575.898	693.475	720.703	713.242	722.078	751.353	698.845	759.494
	647.145	719.096	536.041	695.005	720.924	705.704	719.307	761.406	697.674	762.25
	652.669	656.235	546.352	711.265	752.075	711.047	722.418	757.997	693.802	759.494
	695.288	554.13	523.344	717.19	745.886	699.194	719.926	759.494	722.018	762.171
	699.301	556.466	517.268	706.912	731.263	702.47	699.047	756.01	734.307	760.812
	648.976	632.344	527.235	715.898	726.832	698.487	706.096	745.981	734.565	765.371
	668.145	533.724	518.24	706.454	707.555	704.814	684.612	767.679	726.002	755.771
	624.792	518.077	514.548	721.638	714.632	700.201	687.139	774.015	720.417	752.283
	677.139	637.709	504.793	716.014	694.969	712.949	683.448	764.151	716.776	756.417
	638.067	479.32	494.339	716.965	696.864	710.634	679.656	756.582	717.07	762.871
	690.92	499.188	533.197	714.244	694.115	696.99	683.261	756.506	720.396	764.583
	742.91	505.473	520.94	716.112	722.708	733.474	691.188	755.308	719.622	764.943
	713.842	489.574	499.596	719.352	713.732	740.591	704.579	757.985	719.017	763.423
	695.309	472.873	487.682	724.806	678.503	722.036	687.983	762.863	720.262	753.917
	679.124	473.948	496.807	723.279	675.779	705.206	681.818	755.451	718.327	759.494
	661.241	463.473	487.559	734.552	709.987	701.931	720.744	752.4	718.109	755.782
	665.994	477.999	469.386	731.839	700.33	715.023	732.711	756.045	716.281	757.367
	676.635	547.169	477.395	703.721	705.08	714.647	727.601	755.27	713.496	759.494
	675.792	622.124	600.682	703.936	706.886	720.647	705.882	751.88	714.286	761.974
	648.055	706.276	487.805	720.49	668.111	703.644	713.121	750.986	719.975	762.46
	666.801	623.911	512.846	716.418	668.591	692.855	707.091	746.108	713.159	764.209
	676.894	507.537	476.888	692.247	688.29	698.998	704.07	748.82	715.05	762.558
	670.34	688.858	493.635	718.435	703.256	703.172	710.113	745.342	711.016	763.405
	623.111	689.152	497.052	711.909	723.861	695.802	711.798	767.955	714.286	761.027
	737.941	639.594	506.163	715.663	737.692	720.657	710.829	766.862	711.676	762.228
	741.648	624.104	520.712	717.833	703.256	711.763	711.776	759.494	705.319	763.398
	727.103	612.345	628.38	725.208	750.662	696.755	718.672	759.494	713.164	760.709
	737.979	603.873	502.328	719.57	755.539	709.324	713.009	757.031	710.259	766.334
	723.183	685.296	469.861	722.247	755.789	714.804	717.566	751.381	709.985	761.313
	707.49	703.901	465.632	736.804	738.595	696.034	712.733	746.692	705.236	763.784
	671.05	715.47	482.91	697.71	756.822	703.657	722.892	742.255	711.262	772.828
	695.144	709.039	484.781	714.701	758.827	709.688	722.892	753.151	721.437	772.761
	675.088	709.872	529.761	725.383	751.141	705.375	724.93	752.228	706.766	769.135
	709.306	714.481	500.129	694.262	752.65	704.161	722.892	748.192	701.83	767.555
	659.408	715.306	494.352	720.546	750.7	705.74	716.02	747.228	704.917	775.73
	706.486	722.829	512.564	716.783	745.59	700.438	731.371	750	710.168	767.542
	717.24	681.924	510.886	679.163	741.602	702.653	726.149	746.111	706.53	770.56
	700.141	694.711	536.147	723.856	753.769	705.882	720.295	747.758	708.274	762.909
	668.717	714.479	539.168	669.782	762.598	701.007	723.585	744.959	711.147	767.368
	699.929	706.833	552.286	685.056	754.543	705.241	721.864	747.147	706.36	768.679
	656.003	704.237	531.915	671.175	736.064	703.407	722.855	745.492	716.051	769.231
	637.13	729.593	567.989	673.575	743.73	713.722	725.085	757.376	707.349	769.231
	715.145	534.803	516.695	641.662	756.697	692.743	733.086	761.21	709.552	769.231
	695.88	719.685	537.628	663.603	755.993	696.026	723.366	773.792	717.427	767.899
	641.545	717.878	587.932	645.859	754.697	699.353	705.305	775.54	706.982	761.106
	610.52	716.465	529.224	607.051	757.088	691.405	697.059	767.41	697.248	755.39
	715.497	718.797	534.928	680.782	755.109	698.87	690.643	758.413	703.029	755.538
	656.756	796.664	582.377	687.163	759.996	693.222	705.475	759.494	701.433	759.494
	663.335	537.768	594.776	704.293	760.035	704.991	705.413	761.045	707.311	759.494
	658.94	710.54	557.984	641.878	764.099	692.997	688.595	760.365	705.087	759.494
	646.363	714.573	558.296	640.46	745.726	700.097	705.775	769.231	708.32	759.494
	643.757	707.111	572.194	664.4	747.283	709.762	695.063	759.494	702.84	764.022
	688.325	710.409	625.13	543.817	746.86	708.366	681.74	752.217	712.859	769.231
	636.299	698.596	592.708	540.572	750.762	709.639	703.208	752.569	710.952	766.518
	700.005	547.776	576.806	580.645	751.179	711.918	709.448	752.694	717.043	766.517
	713.888	709.208	650.368	551.831	755.667	703.823	694.641	750	711.418	758.687
	703.658	704.463	612.731	535.684	733.813	671.215	709.898	750	707.727	757.888
	755.269	683.831	565.74	535.972	747.808	625.336	702.97	752.544	711.69	759.494
	748.752	648.813	648.231	526.689	755.311	643.47	689.062	752.342	716.809	763.447
	740.411	634.177	570.222	514.905	756.579	662.376	729.548	750	705.773	763.475
	742.779	696.501	681.929	563.989	732.12	608.412	690.076	760.365	713.422	763.097
	717.325	664.714	541.212	609.234	743.975	610.392	676.22	763.713	718.835	766.217
	706.285	636.01	685.804	642.846	745.111	635.874	676.567	761.866	710.791	764.948
	744.544	616.88	664.195	672.048	720.584	714.829	691.827	757.637	708.897	762.569
	756.096	604.534	679.403	644.676	721.255	710.854	683.51	759.494	724.131	767.015
	719.058	599.758	698.69	619.654	750.772	722.737	672.295	759.494	729.834	772.251
	741.569	587.879	699.736	639.95	735.716	741.504	702.081	756.035	716.813	767.449
	751.208	549.694	698.811	583.463	734.987	721.123	691.251	759.494	704.376	760.276
	754.891	574.643	702.487	544.011	698.741	727.195	719.707	754.603	703.248	757.459
	736.072	553.318	582.901	547.592	686.316	717.119	715.056	759.494	701.975	758.385
	762.587	640.559	703.487	529.422	684.612	706.681	716.563	756.724	703.857	761.452
	775.532	555.903	698.658	515.458	676.784	705.624	717.265	759.494	703.325	761.213
	759.435	532.449	700.888	502.203	670.408	707.418	710.258	759.494	702.604	762.128
	752.694	570.156	704.783	523.113	687.697	706.104	726.917	753.151	712.033	758.526
	753.287	644.304	709.127	499.244	654.036	707.947	747.194	753.99	709.861	768.04
	735.519	639.966	710.912	504.172	640.547	725.449	721.103	769.231	700.823	764.924
	737.093	524.826	712.155	520.521	688.366	727.567	708.411	769.231	705.301	767.507
	705.455	508.814	712.135	505.521	675.176	731.707	716.517	769.231	702.38	767.379
	695.661	546.37	712.508	512.509	663.586	731.707	713.33	769.231	701.828	769.231
	687.636	523.043	712.316	467.044	681.276	749.184	709.019	769.231	702.187	765.189
	653.588	548.677	701.421	668.993	729.794	728.155	721.982	767.054	725.135	763.863
	666.498	577.157	707.326	486.239	720.702	727.089	734.37	769.231	725.302	747.157
	644.759	632.354	719.34	669.529	715.635	712.89	729.353	769.231	716.809	763.14
	652.765	547.44	717.119	608.755	698.639	721.836	711.462	774.779	712.355	762.18
	637.458	530.946	713.318	604.591	691.891	720.012	710.37	776.865	720.14	764.251
	715.122	573.19	718.707	638.901	672.455	718.964	701.84	773.118	737.394	776.689
	691.173	642.624	713.289	653.469	682.347	710.885	703.599	771.792	726.438	777.929
	658.74	620.496	716.028	585.982	687.553	720.627	713.421	775.131	719.305	768.591
	702.836	573.737	718.414	556.111	670.823	717.192	711.905	773.881	719.974	767.182
	651.746	529.568	714.758	586.391	726.347	719.432	709.521	773.274	718.506	769.231
	637.577	537.54	717.423	526.547	730.594	723.734	705.526	773.437	720.061	766.631
	722.16	569.737	719.52	482.679	700.753	705.989	719.882	770.637	718.964	772.784
	696.456	655.921	731.661	487.936	742.213	709.564	718.86	769.231	718.525	769.231
	671.439	662.065	730.703	455.419	728.574	733.646	718.299	773.84	713.012	764.312
	688.818	634.855	726.027	457.414	741.524	728.708	732.902	775.014	718.249	767.023
	665.624	594.69	722.47	447.126	715.218	714.718	721.235	779.221	717.035	768.28
	658.714	577.396	727.5	474.334	686.392	708.783	711.24	774.174	716.16	763.375
	657.636	609.122	722.892	441.199	703.569	709.816	716.532	779.221	722.124	769.231
	697.639	637.848	724.854	435.264	690.582	711.654	721.176	774.135	720.493	765.234
	687.462	640.558	692.948	498.48	681.71	704.688	725.563	781.604	728.892	761.47
	685.349	641.435	679.795	599.455	699.507	699.823	716.39	781.226	721.644	756.669
	676.988	644.508	523.49	604.027	709.145	713.35	726.575	779.221	718.638	758.805
	670.408	644.007	717.703	619.469	710.022	701.255	724.556	779.221	732.53	759.494
	651.194	642.911	723.045	612.954	691.481	708.001	714.286	780.601	745.81	762.336
	655.919	637.366	720.891	628.684	676.065	707.525	723.11	780.793	743.024	574.509
	730.202	647.179	522.993	682.163	669.333	711.546	723.701	781.789	737.606	589.777
	718.089	672.082	706.813	701.812	681.708	703.518	724.18	781.069	737.049	763.101
	757.439	682.127	703.683	636.236	633.576	703.331	724.277	779.221	732.743	760.495
	743.212	581.568	717.151	605.708	608.067	706.557	721.271	786.503	735.983	759.494
	719.563	560.949	708.44	552.017	595.263	702.451	728.222	786.477	726.369	759.494
	687.034	531.794	699.607	525.813	603.689	698.206	728.214	784.611	735.369	759.494
	687.185	517.431	705.016	524.81	630.31	697.113	733.023	781.502	727.425	762.569
	682.917	508.372	707.955	528.246	679.405	695.239	725.325	782.954	733.641	765.25
	636.139	493.814	712.597	492.535	692.875	693.431	737.654	779.221	736.512	755.204
	656.415	478.756	714.286	487.727	719.178	689.585	729.568	783.793	735.823	761.697
	642.554	495.503	719.271	628.978	712.306	712.166	737.309	780.931	735.492	762.022
	614.965	458.134	719.05	563.244	711.231	677.859	740.741	779.221	735.237	759.494
	661.854	454.499	718.796	470.124	720.907	701.471	737.271	783.099	735.144	759.494
	774.471	482.159	717.781	587.038	717.878	710.712	745.742	778.504	740.473	759.494
	771.808	466.582	718.257	518.424	736.023	720.794	756.434	777.061	736.482	753.152
	739.187	451.839	714.329	502.16	726.392	727.549	748.549	775.651	743.671	745.818
	727.503	530.249	700.569	542.672	721.517	723.935	739.264	786.33	737.829	751.477
	731.004	530.303	694.275	524.771	719.973	726.469	740.853	782.134	744.096	759.494
	709.609	434.959	714.286	515.749	736.267	734.335	742.703	780.822	745.033	759.494
	724.88	436.209	711.588	518.062	742.519	733.659	747.163	779.97	736.757	764.272
	685.036	441.804	709.267	507.133	743.631	739.73	744.643	784.017	738.826	763.921
	675.655	421.276	697.195	502.502	727.155	727.694	746.875	783.467	734.405	759.839
	676.578	439.225	550.766	509.154	731.959	723.293	739.768	789.474	739.254	756.845
	675.451	433.465	538.212	487.056	718.755	752.437	754.93	789.474	735.951	753.62
	673.203	442.357	721.558	482.079	717.89	762.668	766.742	783.877	745.671	748.896
	673.85	652.461	731.707	564.833	726.556	740.741	761.934	785.047	739.394	750.343
	727.833	539.604	723.053	669.953	734.819	740.296	759.771	781.581	738.916	751.849
	700.354	444.848	719.035	650.044	736.422	728.328	761.323	787.521	734.075	753.31
	680.231	469.341	705.08	651.443	728.886	719.516	755.86	784.928	710.688	746.915
	657.398	417.276	725.075	706.516	733.039	712.517	743.374	789.474	743.842	758.742
	639.975	396.349	703.096	651.187	724.991	716.834	735.782	789.474	750	763.351
	722.768	393.681	693.695	653.284	741.109	698.313	736.254	781.868	747.673	759.494
	754.367	416.899	668.668	607.834	720.311	689.933	738.126	780.918	744.773	759.494
	752.823	394.074	656.879	543.491	723.997	709.306	736.14	780.567	742.039	759.494
	743.922	500.809	645.882	551.772	731.902	700.106	734.097	788.277	736.196	762.182
	757.516	543.954	648.63	526.316	741.452	711.564	734.943	789.474	712.559	761.383
	748.77	621.958	636.903	513.666	732.634	711.817	704.625	787.362	758.39	764.526
	740.105	557.615	652.529	523.7	738.493	717.045	748.076	777.879	759.494	769.231
	742.193	485.323	678.608	503.888	724.806	727.198	744.681	783.163	755.215	769.231
	735.109	405.815	658.61	475.882	705.158	715.355	744.078	779.221	747.296	765.283
	710.49	468.585	658.831	497.496	686.042	723.152	728.391	783.044	746.658	766.938
	688.697	555.171	656.203	489.609	666.053	725.172	731.007	785.761	744.862	769.231
	672.632	663.523	677.04	470.296	725.279	729.383	732.519	784.632	742.957	766.754
	677.812	543.263	699.46	504.045	734.775	748.114	727.217	780.583	751.03	768.451
	650.159	398.45	686.836	538.072	742.322	752.881	738.159	780.918	742.885	772.284
	659.241	661.144	642.554	634.525	717.312	754.618	727.254	776.433	739.187	755.838
	638.62	653.142	636.042	668.243	708.049	747.74	727.199	783.977	745.114	747.994
	659.341	686.754	639.152	666.061	749.958	740.553	724.023	780.242	742.098	755.519
	619.343	698.455	626.203	655.226	749.734	737.718	725.635	777.649	749.226	758.401
	665.4	697.346	605.137	667.844	755.691	729.419	721.362	778.591	745.721	756.315
	686.096	696.657	669.121	673.578	757.772	729.308	720.941	776.385	744.402	757.855
	642.489	705.771	665.595	692.826	754.59	721.759	714.946	773.714	746.737	761.12
	701.931	702.175	648.616	679.749	754.608	722.564	726.288	778.041	740.437	756.624
	740.698	709.742	637.031	648.582	743.526	739.17	723.648	776.983	740.741	758.502
	723.877	712.877	706.268	637.325	706.714	736.328	701.663	786.585	742.431	745.361
	694.592	714.861	565.268	623.828	749.197	742.987	696.219	778.555	706.674	756.679
	663.469	718.047	526.077	579.238	718.122	741.652	694.508	783.114	716.625	770.838
	684.019	721.781	524.862	545.487	704.602	729.077	693.796	783.74	735.691	759.411
	658.676	716.909	529.047	635.42	692.707	730.961	695.414	785.308	761.994	751.579
	661.341	721.078	531.376	546.573	656.054	724.979	701.011	786.33	754.355	754.66
	707.239	723.116	531.541	540.032	649.413	723.512	692.686	779.221	750	756.2
	704.846	726.967	514.514	504.928	660.606	726.271	695.857	783.187	756.353	759.494
	666.667	718.477	519.334	480.027	660.393	730.392	689.027	783.41	756.773	759.494
	669.021	717.237	506.98	514.354	757.838	727.486	700.425	781.138	754.622	759.494
	670.578	555.341	506.225	491.654	742.121	723.548	703.174	783.622	751.287	746.599
	680.439	714.675	519.81	543.699	729.361	730.254	710.248	789.474	750	755.284
	724.6	703.767	536.174	472.415	715.184	723.694	702.223	783.819	750	754.858
	656.548	720.042	670.391	487.17	719.711	721.832	708.942	786.198	755.542	748.365
	638.362	711.744	598.277	448.687	702.592	716.189	720.692	782.688	752.275	754.116
	692.022	694.709	519.266	439.66	715.007	726.369	720.037	789.474	750	756.826
	738.417	698.193	517.241	471.1	710.039	708.529	708.869	789.474	747.437	756.693
	722.973	693.295	562.684	580.172	702.893	722.197	708.526	786.132	748.069	744.099
	729.664	679.367	607.441	474.074	714.249	712.835	693.454	784.928	745.189	744.928
	758.693	710.712	492.939	527.145	704.362	729.173	702.984	787.578	737.978	744.004
	754.314	723.447	496.119	445.211	705.96	733.964	713.154	793.887	747.539	749.277
	759.584	700.228	536.872	463.462	742.481	749.29	725.733	786.395	744.665	750.828
	759.446	717.131	526.9	463.546	739.367	750.782	717.254	794.814	747.315	756.353
	764.491	717.511	518.564	450.923	721.945	744.078	715.305	793.302	755.905	759.494
	758.128	542.277	507.587	446.628	725.819	731.485	721.044	785.945	756.302	759.494
	761.025	713.283	589.047	455.688	719.321	722.527	711.561	782.757	752.089	761.165
	761.114	688.45	539.58	547.783	718.697	721.03	710.952	778.867	750	754.304
	758.577	696.56	488.317	527.408	726.526	716.672	710.421	773.441	743.761	752.119
	758.199	692.829	478.52	477.917	705.394	713.998	699.642	774.648	747.519	752.263
	765.709	690.874	519.952	503.91	711.974	713.314	742.942	785.602	745.116	763.504
	765.722	372.96	506.543	497.425	715.288	714.322	754.07	781.899	743.147	765.494
	771.139	693.712	498.323	563.286	706.638	715.36	739.179	782.476	735.573	752.076
	787.005	700.724	504.769	548.587	705.053	704.549	717.428	787.225	737.642	754.05
	786.237	702.408	516.482	491.654	751.451	707.06	744.459	786.013	742.93	756.544
	766.002	705.567	501.209	453.617	735.904	708.346	741.588	786.132	740.741	755.249
	769.378	692.419	513.262	470.404	720.109	710.023	742.656	782.688	743.44	755.429
	756.054	690.475	558.309	629.759	718.782	708.046	727.016	789.474	742.249	753.418
	753.261	705.123	532.822	547.487	717.436	707.203	709.01	787.234	738.259	757.376
	752.888	694.043	549.762	468.335	713.584	699.965	721.612	791.109	744.59	757.376
	760.012	723.279	506.521	461.375	717.313	708.722	719.162	790.594	739.119	755.606
	760.635	730.761	494.627	488.543	708.624	702.649	722.892	792.099	741.301	755.098
	767.66	522.621	495.322	512.713	706.735	716.696	731.617	792.059	742.816	749.114
	779.065	681.291	547.793	509.888	720.541	705.664	713.814	789.474	742.174	750.795
	769.594	700.076	544.294	536.25	669.96	715.828	711.981	795.804	750.383	763.988
	768.335	551.098	572.401	672.011	677.966	721.139	689.795	787.489	750	765.7
	775.215	681.57	580.665	669.686	663.051	719.007	756.022	789.474	746.449	762.443
	756.819	474.272	599.407	696.191	633.653	709.667	756.683	797.372	740.818	759.494
	747.928	706.264	565.724	689.119	640.768	714.286	787.29	793.338	731.508	763.366
	756.323	572.212	504.453	691.791	615.212	722.051	767.494	790.683	736.724	765.16
	746.133	532.226	506.264	686.202	635.272	711.917	752.156	789.474	738.217	763.524
	735.285	686.09	544.376	661.562	713.012	710.434	758.321	788.758	738.387	761.214
	756.225	643.328	581.114	625	709.378	718.697	744.222	790.948	740.741	765.608
	718.816	671.58	558.027	708.675	703.389	727.819	719.722	789.474	734.087	772.076
	705.971	626.018	538.556	708.124	764.511	722.892	713.13	791.436	742.689	764.016
	724.211	608.108	549.929	706.161	759.727	724.971	725.526	792.778	738.275	763.327
	736.683	604.2	558.547	715.254	752.645	718.708	714.209	787.035	738.797	766.088
	759.581	627.451	554.187	694.407	760.93	718.818	685.287	794.48	738.639	765.661
	731.479	609.491	568.486	699.832	762.146	715.953	718.379	792.978	743.391	761.808
	743.989	586.753	597.53	707.203	748.883	714.899	665.972	790.729	740.741	740.288
	731.92	633.717	601.227	728.643	746.748	706.953	688.992	789.036	744.473	741.9
	745.275	620.21	566.295	728.382	738.472	714.031	715.019	787.839	741.962	757.195
	732.71	587.962	539.939	721.722	727.544	710.85	703.301	794.037	743.288	758.273
	706.006	615.212	613.094	729.09	736.727	719.794	697.11	792.412	748.796	764.676
	570.154	589.183	587.908	728.005	725.158	720.491	703.088	792.256	743.551	758.529
	725.375	588.143	567.125	729.226	735.059	734.63	702.409	790.394	738.983	765.849
	713.653	589.636	511.556	730.229	720.921	724.608	703.926	791.622	735.858	751.764
	741.001	608.088	560.426	729.436	722.163	727.15	695.318	788.798	733.333	752.493
	724.378	630.44	684.706	711.157	723.475	729.125	696.26	791.541	739.188	753.745
	727.909	659.042	700.373	726.31	758.396	731.187	697.958	792.388	718.048	757.165
	722.207	651.039	618.879	734.837	725.389	723.724	697.892	788.038	722.051	741.301
	755.794	668.246	501.114	719.172	721.168	711.162	696.219	791.128	716.074	737.892
	755.505	616.998	633.212	687.91	720.501	715.549	686.687	784.492	722.265	750.605
	743.385	613.389	539.912	705.602	699.414	714.213	686.499	800	723.149	747.769
	729.786	557.332	499.168	697.132	697.82	704.46	690.284	795.425	722.063	750.283
	734.711	554.371	515.867	693.306	694.685	710.1	691.398	788.162	732.076	748.371
	722.048	546.18	516.377	663.143	721.586	708.687	699.541	794.661	750	741.153
	748.79	549.642	523.238	678.798	713.975	715.748	700.958	794.662	742.033	743.548
	747.599	567.361	528.206	694.283	702.193	708.637	698.396	788.384	739.22	737.527
	751.016	556.993	615.12	693.997	700.518	717.689	694.827	796.206	749.695	736.644
	728.271	535.414	538.731	721.282	730.377	719.348	710.615	793.514	745.3	751.243
	751.768	569.266	521.739	725.764	704.941	712.949	695.884	787.385	743.034	748.68
	751.33	549.178	517.294	725.946	717.517	721.154	694.15	793.87	735.278	739.842
	748.564	574.614	601.313	720.446	755.851	726.809	708.416	793.842	738.985	746.729
	745.005	625.908	569.18	721.92	710.023	731.297	723.571	788.589	753.657	745.794
	737.579	689.397	509.582	716.447	686.534	730.408	730.038	794.764	744.394	746.624
	746.798	653.533	524.879	722.542	669.122	728.409	728.896	791.18	743.841	747.065
	740.873	522.611	570.244	720.203	683.217	729.278	723.259	788.955	743.568	746.675
	743.713	482.791	577.186	719.4	658.044	718.708	723.95	786.865	747.467	755.701
	739.506	485.357	542.671	728.745	673.987	705.419	725.518	786.592	750	750.189
	753.995	499.05	544.376	735.247	682.375	715.983	720	785.292	751.255	745.6
	750	515.777	584.467	724.333	688.666	706.75	726.115	794.149	756.224	740.927
	748.447	511.12	558.551	735.159	678.155	740.228	726.917	792.573	750.982	741.566
	747.731	553.444	552.601	730.739	653.898	731.783	714.58	784.776	744.129	746.329
	749.055	494.767	595.996	730.912	709.88	731.821	719.913	783.772	738.818	753.267
	747.263	501.89	536.906	722.42	733.769	717.469	726.154	786.482	736.029	757.469
	747.854	574.354	524.257	726.99	735.965	712.78	724.458	776.807	729.779	757.614
	749.297	642.429	506.672	716.896	730.408	702.934	727.983	785.801	729.418	751.386
	751.768	498.682	535.417	738.63	726.113	702.11	730.323	777.565	734.368	750
	737.772	511.63	644.924	714.762	717.071	699.47	734.466	777.761	740.741	752.639
	710.806	473.133	540.076	710.597	681.71	704.225	728.027	783.346	743.634	747.682
	697.143	489.04	604.454	691.778	695.714	689.146	723.004	781.95	749.882	750
	699.165	544.544	600.379	679.44	682.996	695.475	721.602	774.559	766.49	750
	671.019	601.852	570.634	678.087	677.236	698.096	728.381	775.449	762.25	755.996
	685.784	625.206	598.656	698.589	666.322	719.09	734.643	775.092	762.404	752.552
	652.736	608.098	582.23	684.634	664.309	693.449	734.928	784.847	754.243	749.92
	666.295	600.66	567.182	656.813	652.816	678.651	734.868	784.274	769.231	746.438
	692.273	606.128	559.091	691.043	661.832	700.46	733.757	782.65	766.473	750
	670.834	655.954	598.458	726.418	654.311	668.448	733.739	782.914	761.379	750
	674.633	584.801	582.792	729.91	662.225	683.916	726.282	783.266	764.735	750
	665.591	563.123	546.227	724.193	696.313	688.919	728.597	785.839	761.598	750
	644.333	538.638	542.407	709.205	670.815	696.302	727.826	793.007	751.579	751.4
	636.916	533.625	548.485	719.268	673.51	702.004	736.996	781.503	750	755.194
	647.732	507.883	572.864	720.326	700.651	700.637	737.98	780.733	751.812	747.079
	658.164	525.892	554.237	716.37	709.106	703.579	737.361	780.031	742.462	747.692
	689.834	515.495	618.841	714.937	712.409	707.741	743.532	782.211	747.918	747.32
	696.442	530.108	571.141	730.258	701.537	707.804	743.598	775.429	758.023	752.235
	671.743	500.077	554.882	727.316	704.907	703.471	740.493	783.882	754.54	750
	643.616	533.36	544.932	666.632	714.799	709.296	736.196	774.01	759.691	753.48
	641.355	507.257	522.796	730.34	705.882	702.657	740.741	777.186	769.231	757.127
	659.341	507.534	581.789	706.162	708.247	710.908	736.5	773.758	766.989	756.341
	655.419	523.339	580.241	719.869	737.782	701.896	739.239	777.154	766.618	758.209
	618.827	540.458	608.753	720.384	717.909	701.989	549.345	777.376	761.476	750
	613.897	505.928	546.787	714.635	706.453	699.124	701.862	773.625	759.494	744.85
	616.772	485.979	618.768	737.092	672.88	708.553	703.125	771.685	756.458	747.941
	739.114	557.745	608.043	722.855	654.578	711.685	701.594	766.346	755.891	752.95
	668.9	503.125	597.18	740.091	637.603	707.127	711.501	766.594	759.494	753.018
	615.307	516.785	594.491	726.002	685.17	722.855	693.342	771.459	764.033	756.972
	594.271	537.939	593.531	726.712	628.714	721.398	696.613	770.825	758.044	759.494
	616.376	500.871	585.809	722.304	632.859	717.229	723.744	816.832	759.494	759.494
	635.548	495.868	575.678	728.469	634.197	731.219	708.613	818.452	764.735	756.815
	627.893	529.716	606.588	726.366	655.539	689.718	712.445	800.849	759.494	751.391
	624.27	569.231	584.636	731.144	638.298	671.198	719.677	784.399	759.494	741.532
	637.2	443.634	601.552	714.085	623.269	755.434	711.791	784.042	761.529	750.088
	610.42	431.698	572.467	707.666	627.336	753.164	722.27	780.765	759.494	748.749
	616.709	441.781	590.73	665.195	666.801	755.82	722.928	781.659	753.817	735.192
	657.981	578.418	594.901	657.731	718.857	760.875	713.451	752.262	769.375	728.546
	649.016	544.021	652.174	713.398	744.788	756.111	723.296	757.338	769.231	712.434
	694.862	525.41	645.358	714.359	745.829	752.351	718.104	743.015	763.561	714.769
	662.114	635.525	660.426	678.948	497.193	753.792	731.118	734.99	759.494	714.652
	621.029	456.86	622.749	702.281	401.562	746.053	728.097	740.392	754.393	709.629
	602.017	451.082	614.925	710.549	773.196	741.904	730.887	726.928	753.061	720.196
	681.782	463.753	589.994	639.869	763.264	722.782	735.147	745.53	748.371	755.026
	650.289	443.702	628.702	708.297	758.96	714.717	726.708	724.316	760.825	742.978
	629.722	453.346	610.159	695.167	750.079	697.71	732.957	743.205	749.696	732.224
	614.717	444.826	587.527	567.132	748.217	693.702	721.085	736.715	772.876	731.965
	603.402	470.707	590.81	712.215	749.431	690.442	720.982	760.644	703.243	729.299
	660.046	495.443	593.723	657.127	746.954	708.805	720.804	738.573	717.276	732.214
	634.969	456.101	606.898	659.706	747.704	689.899	718.081	753.784	699.744	741.046
	610.552	539.639	599.694	661.157	746.053	712.668	717.849	756.926	705.918	744.376
	588.564	540.569	589.763	651.314	746.104	705.056	723.922	753.189	694.325	751.971
	585.943	585.465	611.489	631.804	748.13	713.156	725.191	752.85	712.516	741.153
	729.563	568.898	607.41	636.205	750	722.453	716.842	757.202	719.691	736.783
	721.044	637.738	600.789	631.483	748.368	715.974	720.078	771.841	720.816	732.704
	706.819	491.854	604.294	626.414	753.93	712.699	714.106	775.5	737.078	733.935
	655.99	531.672	599.469	624.809	747.02	720.15	707.312	758.123	736.6	731.226
	741.426	492.819	612.804	622.323	746.679	702.073	709.859	770.082	728.267	709.038
	737.66	457.645	652.825	655.605	751.153	703.768	712.871	768.722	736.404	722.635
	746.297	537.422	643.236	653.555	751.629	718.473	711.755	768.015	735.732	737.145
	737.03	477.204	617.776	622.6	749.39	713.234	704.973	765.314	729.776	732.88
	754.837	441.755	622.074	616.198	745.692	713.913	715.232	754.073	729.512	733.294
	749.872	455.895	622.312	612.808	748.184	718.317	724.953	765.352	716.239	734.667
	742.335	485.768	609.543	620.542	746.408	717.381	698.384	760.383	729.418	737.529
	727.197	586.149	596.122	639.404	749.024	720.934	710.117	768	730.024	736.513
	717.749	671.791	533.333	681.312	754.344	720.026	711.61	755.714	729.503	741.871
	708.161	500.278	662.871	673.918	734.375	721.26	673.489	771.881	729.217	705.845
	741.461	421.255	511.987	679.348	739.739	715.681	691.055	753.165	721.99	711.885
	772.63	406.225	508.269	677.114	728.745	718.708	699.088	772.22	723.514	732.315
	763.683	454.476	500.851	637.714	727.848	719.888	695.456	762.107	728.243	725.261
	740.258	423.135	533.226	661.174	734.46	709.347	696.282	759.186	734.057	707.418
	741.763	428.528	545.785	654.868	733.171	716.329	706.865	756.811	736.099	703.137
	731.309	486.601	497.3	646.238	718.466	713.609	711.004	757.958	744.024	716.802
	726.546	443.028	504.151	639.62	712.964	725.154	718.409	763.715	708.061	712.489
	743.841	467.28	519.126	636.28	710.476	709.257	708.821	756.535	711.724	707.281
	756.101	440.685	613.215	640.064	713.277	702.994	709.949	774.644	713.915	718.073
	721.699	467.775	507.496	626.703	736.12	714.592	708.184	761.623	715.445	726.361
	730.477	645.663	497.724	612.677	724.799	703.076	701.645	758.992	711.655	724.975
	715.94	477.518	492.544	618.121	706.654	708.001	720.266	765.288	730.923	722.343
	701.816	443.904	475.833	606.615	709.471	703.404	703.101	765.084	725.616	740.86
	710.023	428.463	595.434	604.413	691.768	705.918	702.018	739.425	719.25	759.891
	706.497	434.123	511.277	590.949	686.429	703.572	693.782	756.817	736.031	762.273
	694.992	508.154	508.988	584.684	690.244	699.053	699.611	761.067	733.712	745.918
	710.778	605.786	483.945	590.069	701.001	694.714	694.967	747	733.37	737.744
	694.636	624.086	519.625	574.623	721.154	719.566	700.789	752.819	749.913	736.117
	681.265	488.884	515.62	592.577	770.053	698.209	690.711	768.763	703.579	746.362
	685.94	464.082	551.373	647.14	757.628	696.409	689.834	748.222	702.151	740.935
	686.304	603.268	579.112	671.405	765.504	700.171	674.123	746.85	687.609	746.435
	684.489	594.556	571.786	652.743	755.141	691.848	674.192	740.514	699.094	749.106
	709.388	607.254	563.771	663.304	757.559	691.244	692.791	738.201	707.84	755.941
	760.384	574.454	534.208	662.245	754.087	688.423	679.165	728.06	706.931	750
	742.968	654.659	643.147	659.54	762.25	683.207	672.242	762.712	730.645	739.931
	703.528	692.669	626.269	655.165	750.704	678.548	669.122	739.415	707.355	738.536
	660.439	695.077	618.217	673.813	746.201	685.627	678.959	752.063	694.886	737.194
	666.768	708.16	600.125	666.196	746.26	681.818	684.158	739.207	692.939	735.241
	645.455	542.443	653.484	615.599	743.161	690.754	694.22	710.571	698.242	735.541
	637.071	487.994	531.565	648.764	729.792	688.324	691.456	737.832	692.663	737.234
	629.807	684.151	491.619	617.452	735.69	676.167	690.393	740.585	698.892	739.037
	616.895	664.448	605.737	577.352	712.175	671.955	688.957	742.816	702.128	740.741
	624.621	658.336	518.286	577.08	731.131	681.49	686.938	735.525	690.697	741.264
	601.096	653.103	599.751	582.294	749.616	684.133	675.627	727.733	708.247	754.091
	622.043	623.917	649.021	614.565	753.498	681.191	667.64	723.256	704.146	753.708
	610.615	618.119	711.942	536.65	749.689	696.899	682.349	731.138	695.661	743.324
	614.303	635.415	715.442	498.85	740.52	687.011	655.292	739.55	708.541	744.59
	623.77	608.887	707.804	482.738	742.268	707.857	641.646	732.078	700.016	748.122
	617.24	570.151	691.276	459.318	751.138	692.02	673.139	759.903	686.915	750
	599.758	547.596	682.084	499.697	750.601	691.511	680.885	734.057	692.785	746.487
	579.472	528.035	695.867	458.658	752.446	699.964	678.411	733.065	694.025	744.872
	589.493	598.746	710.622	439.86	723.559	700.389	684.351	761.216	677.131	749.503
	676.013	503.894	715.845	426.669	734.185	706.176	684.967	751.546	675.779	759.494
	590.253	496.679	712.022	441.582	758.874	706.138	681.604	752.33	686.324	759.494
	578.468	508.081	711.271	441.673	755.389	694.839	697.852	718.981	676.737	755.993
	620.902	544.253	713.457	442.907	745.755	687.941	684.373	720.812	675.541	665.524
	577.455	555.672	714.286	428.287	704.553	682.128	678.514	709.496	691.827	762.66
	571.22	629.295	705.455	423.536	745.301	685.642	704.218	716.2	684.931	752.787
	589.65	624.772	710.269	440.367	737.486	678.685	646.079	711.805	693.805	738.677
	670.391	620.53	713.781	495.535	714.731	664.251	661.508	728.576	696.723	731.597
	687.109	647.667	716.387	426.708	706.294	716.685	671.299	735.257	696.719	729.427
	633.846	675.211	716.343	400.465	681.435	648.157	656.029	737.795	715.616	734.59
	645.315	619.585	713.534	405.238	659.48	654.422	677.214	747.074	698.239	759.634
	665.316	609.406	711.525	428.941	678.181	671.54	677.722	749.149	703.27	769.231
	678.62	554.175	710.587	415.319	694.444	664.845	684.295	747.976	698.114	759.788
	651.578	636.774	712.902	411.711	687.87	654.636	684.014	753.333	713.205	759.607
	657.841	571.252	709.03	413.028	659.593	654.512	690.191	752.413	709.557	760.224
	690.504	674.609	715.596	403.275	619.985	684.365	687.51	746.392	705.74	759.088
	654.446	517.136	719.041	411.106	670.609	657.267	680.599	750.458	693.023	763.939
	666.428	472.441	730.699	404.419	610.411	667.371	689.024	750.927	706.17	765.705
	660.639	470.172	732.243	410.23	592.79	686.096	674.916	747.87	705.264	762.991
	682.249	557.854	720.059	406.924	714.576	697.915	674.195	746.647	698.87	762.162
	664.252	484.219	719.215	415.056	592.585	677.658	646.205	753.178	688.504	766.962
	652.933	482.631	717.235	481.432	582.154	702.04	647.206	742.911	698.624	773.25
	657.227	485.689	714.636	570.579	595.232	712.013	634.937	743.868	736.798	757.79
	657.482	639.959	718.563	547.563	583.09	702.004	607.548	758.487	708.851	759.981
	665.202	616.09	731.358	602.815	573.209	718.442	633.576	746.175	701.559	746.86
	674.157	506.957	602.183	687.763	575.722	718.65	630.438	741.687	682.485	735.078
	717.831	517.595	729.838	523.431	537.528	725.514	701.899	741.975	696.212	734.076
	725.831	676.983	729.167	496.495	529.385	731.707	664.82	735.38	682.135	736.474
	717.375	660.383	727.603	451.606	595.865	725.916	654.498	747.664	679.768	737.258
	712.618	668.405	715.982	427.661	555.07	728.782	627.73	740.892	694.099	739.26
	718.676	698.377	707.626	428.895	550.06	719.606	670.539	741.189	693.481	582.173
	711.17	688.008	711.123	459.465	540.16	722.965	624.374	738.666	683.874	521.813
	702.569	516.473	551.393	458.669	547.14	720.753	602.844	746.496	670.897	479.397
	686.999	677.223	563.396	479.802	540.568	714.808	609.214	770.773	714.808	746.144
	706.775	696.676	728.106	728.075	519.178	724.583	624.365	752.261	712.56	750
	689.968	710.781	735.294	738.233	504.075	693.317	651.916	746.237	699.329	755.698
	703.088	704.47	731.617	735.147	563.181	680.147	657.646	744.103	697.288	751.688
	690.944	707.764	719.031	682.458	551.794	691.958	679.451	740.702	683.891	544.359
	695.203	709.113	725.218	583.49	616.48	669.717	676.539	740.853	685.594	354.183
	698.483	715.503	719.634	662.828	602.984	672.448	687.246	734.669	695.91	369.986
	687.069	717.032	714.005	697.92	533.623	678.377	683.267	735.524	690.196	552.253
	685.298	716.339	692.25	706.431	581.466	681.302	685.854	731.819	674.963	752.351
	677.096	715.75	701.491	581.634	617.405	678.206	686.691	723.684	660.086	759.494
	718.852	715.35	690.964	593.274	525.971	685.052	681.993	718.436	683.386	765.065
	689.62	715.299	700.641	717.479	504.939	674.411	682.167	730.154	686.061	762.94
	691.413	717.63	696.502	725.605	607.97	686.042	681.265	710.804	680.724	755.323
	684.123	717.118	674.328	716.353	584.023	674.084	672.829	712.453	678.539	762.305
	697.358	717.54	674.701	718.22	522.346	715.664	676.465	716.071	703.635	759.89
	694.992	717.474	666.208	711.288	605.938	700.587	649.079	738.546	691.236	748.511
	714.584	720.806	651.869	668.533	537.634	676.323	660.584	737.369	727.485	751.496
	727.249	726.982	641.761	672.646	556.4	672.521	642.67	742.687	715.404	732.189
	718.484	733.255	645.423	570.359	543.588	676.076	627.843	752.531	711.682	751.824
	718.416	721.883	651.083	532.785	513.652	683.023	610.293	747.769	719.297	775.845
	715.732	726.982	637.297	527.63	513.756	675.301	577.097	727.199	713.241	759.084
	711.798	726.869	645.388	643.047	521.713	675.723	599.606	725.769	719.8	752.062
	689.655	725.439	637.125	682.671	607.626	673.906	568.36	706.096	708.202	717.319
	705.737	726.613	634.507	718.68	518.313	668.954	564.756	715.508	719.172	711.111
	689.585	730.369	642.935	695.253	526.076	674.905	598.435	696.331	726.744	709.798
	709.659	732.881	632.194	693.677	550.124	666.734	554.172	690.839	722.487	703.475
	753.004	731.882	637.27	637.834	503.897	680.92	547.723	679.199	731.513	707.232
	749.91	742.896	644.823	644.584	523.608	651.776	555.388	658.897	734.785	717.804
	749.593	738.516	701.883	631.271	507.779	656.957	589.003	670.017	727.322	729.272
	748.547	730.737	680.466	714.443	601.702	667.293	591.148	657.41	727.991	748.13
	745.046	600	648.042	708.186	508.629	688.893	581.583	654.254	714.729	750.196
	745.179	616.848	631.903	708.573	559.996	660.661	626.545	664.697	728.31	744.854
	750	716.174	608.59	727.357	526.396	657.908	623.235	646.271	716.487	751.605
	752.003	728.745	636.475	719.731	555.217	662.265	625.823	653.905	729.603	747.541
	750	717.646	647.206	717.688	714.513	667.731	639.168	730.951	718.692	741.411
	746.862	615.18	630.182	719.76	597.953	660.031	528.483	711.582	707.347	743.357
	751.672	602.328	616.708	721.767	533.981	680.093	570.991	699.107	701.719	752.594
	751.587	566.174	610.293	716.571	490.438	666.768	595.136	667.147	687.429	751.598
	750	705.465	602.969	713.079	562.103	666.968	621.181	656.877	684.353	750
	748.447	715.569	628.703	720.096	529.492	685.271	660.511	642.595	666.667	754.736
	745.4	723.115	625.946	733.07	517.737	681.639	650.415	640.341	690.529	756.468
	750	705.882	608.129	716.03	570.093	673.71	652.891	609.915	656.789	752.475
	750	685.53	639.526	724.707	553.109	674.735	656.701	680.216	657.742	759.494
	744.698	693.301	660.667	715.849	624.683	688.011	668.226	639.404	654.678	754.034
	750.931	688.859	665.545	707.516	688.102	692.636	679.656	654.81	645.62	744.906
	749.414	685.915	654.248	686.788	681.128	701.669	676.611	653.003	631.409	743.053
	752.341	525.453	637.173	698.218	739.735	697.629	658.047	635.689	672.304	739.207
	764.51	531.781	615.176	712.558	735.969	691.554	655.837	648.215	618.557	748.236
	769.738	688.744	622.156	685.732	742.147	686.484	664.76	670.46	616.303	738.795
	767.027	488.818	598.489	721.906	742.932	700.556	689.151	714.769	613.959	732.704
	761.071	708.029	598.327	729.463	756.447	696.423	665.255	731.333	576.107	738.801
	758.803	690.979	599.653	726.295	759.961	687.097	657.301	713.85	598.473	740.897
	763.583	722.389	611.457	686.717	755.295	658.525	644.506	708.516	650.621	709.465
	762.406	705.927	684.884	684.981	755.329	692.06	634.68	716.53	664.049	703.651
	774.778	671.006	666.494	686.906	761.119	672.116	638.67	716.337	642.493	703.687
	762.997	694.967	673.441	671.436	753.053	696.816	639.362	715.665	627.964	731.634
	760.57	704.234	664.157	661.528	733.037	663.421	615.369	721.892	632.727	734.977
	769.96	494.574	687.736	634.544	734.77	675.739	616.407	722.418	625.835	736.177
	764.882	523.209	672.967	611.741	758.973	676.031	610.139	722.47	617.926	726.182
	764.432	519.291	661.724	633.173	752.608	711.572	630.575	737.146	629.508	731.67
	758.817	709.783	664.66	624.076	753.392	730.388	625.945	736.012	643.569	731.078
	753.323	712.856	658.205	609.445	758.7	683.636	638.948	725.085	681.111	738.3
	755.703	608.794	643.22	664.253	757.735	684.36	634.839	706.527	712.128	730.517
	750.755	541.948	648.154	694.298	748.414	689.114	643.857	706.063	700.34	745.031
	748.569	516.824	656.306	727.422	757.506	668.144	659.84	706.168	700.797	738.482
	753.227	683.636	638.298	699.294	761.178	707.705	653.309	708.625	733.85	743.187
	758.17	539.231	663.168	742.477	759.069	728.955	651.942	695.104	728.732	741.91
	758.064	510.625	655.938	705.334	756.154	728.961	668.044	709.753	733.709	737.717
	753.486	538.144	630.578	697.596	752.799	718.099	670.34	716.739	749.32	730.136
	748.954	587.556	685.806	699.029	753.306	726.424	672.123	715.476	707.276	734.923
	627.215	541.494	684.792	650.449	748.894	729.564	675.039	728.704	723.802	740.741
	742.597	695.232	675.827	610.262	764.565	724.728	666.835	733.404	721.667	736.934
	748.605	677.427	663.132	723.84	754.988	726.934	677.036	735.036	730.343	731.707
	759.553	583.338	700.52	733.982	758.372	725.765	677.693	744.115	740.66	733.945
	749.177	697.039	685.993	737.183	753.212	724.797	668.396	742.469	742.768	749.472
	739.297	692.965	679.121	704.269	758.234	726.346	664.005	743.062	750.925	746.672
	732.795	685.296	662.983	717.007	757.801	729.119	655.336	740.741	734.895	719.727
	731.021	667.959	679.851	678.872	756.757	730.273	663.95	747.126	752.869	728.376
	731.75	705.534	680.265	703.523	759.494	731.707	653.251	744.74	737.777	719.951
	733.09	697.214	691.466	699.765	755.807	726.021	642.987	738.19	741.918	708.948
	728.31	521.604	692.054	723.272	756.63	726.539	647.252	753.317	731.475	701.953
	770.323	670.086	693.284	728.446	749.664	726.882	665.188	748.56	733.86	696.715
	753.323	569.223	694.733	735.635	744.664	731.028	662.477	743.562	737.705	684.606
	743.752	664.331	700.018	730.109	742.743	729.673	662.644	743.865	735.563	736.896
	752.34	666.667	714.189	744.74	763.662	722.127	655.38	737.958	729.927	757.946
	743.459	645.067	722.424	740.465	753.003	729.033	678.034	745.551	731.594	738.83
	746.269	695.469	702.894	730.761	757.522	728.087	649.842	738.871	736.528	734.309
	751.053	702.644	711.551	670.338	756.87	717.038	629.667	741.565	734.076	720.848
	754.113	687.061	712.779	638.461	754.636	721.789	614.035	752.102	731.258	722.041
	740.975	694.665	724.724	615.052	741.231	723.376	622.032	744.656	742.015	719.183
	751.326	695.297	721.843	601.215	747.737	721.057	623.581	736.553	741.455	720.492
	754.864	702.018	690.564	578.809	749.24	728.322	587.76	734.298	744.227	705.729
	748.543	712.581	520.221	582.586	749.762	721.41	615.151	737.832	732.531	710.672
	566.953	705.992	684.704	575.09	728.906	717.565	633.942	732.889	734.022	750.939
	764.745	702.426	520.851	577.98	722.002	718.324	664.562	723.296	720.99	752.074
	760.727	707.855	676.374	616.531	715.692	714.839	641.341	740.25	727.956	739.263
	765.717	715.778	673.388	699.754	687.652	721.868	657.742	750	720.576	758.037
	752.274	714.8	667.083	723.37	674.843	720.535	648.054	744.038	711.45	759.196
	762.202	569.177	663.717	694.395	690.13	725.292	695.789	730.26	691.438	761
	751.692	725.118	643.589	678.018	666.213	723.577	700.012	734.311	677.656	764.716
	762.602	730.033	660.916	733.259	725.075	714.207	709.763	727.141	691.732	765.679
	759.494	725.883	647.409	733.144	698.273	715.162	709.328	729.483	675.802	750.925
	751.96	726.879	459.243	705.76	684.657	687.932	714.286	716.152	717.256	749.83
	764.696	720.529	608.815	702.495	684.7	673.819	714.144	736.55	701.356	757.678
	763.464	710.029	627.2	735.822	667.932	677.208	716.856	725.64	706.741	736.576
	763.475	696.254	643.218	716.225	644.891	670.374	713.262	720.839	695.056	745.688
	762.2	713.909	657.938	718.053	641.973	683.018	707.233	724.841	697.711	755.505
	739.509	714.286	651.499	713.161	648.581	681.973	682.594	725.701	689.509	754.674
	746.082	701.104	673.005	716.703	691.008	666.94	688.775	725.547	688.2	758.203
	755.716	720.506	673.007	710.498	694.676	654.235	689.094	722.892	698.268	763.376
	756.692	554.517	683.463	723.018	656.648	647.014	697.17	722.892	700.552	754.008
	754.168	699.981	680.724	728.941	705.516	639.894	706.382	717.645	714.938	757.6
	753.602	697.91	676.891	728.33	691.878	674.919	705.832	716.793	722.439	757.023
	741.796	528.201	684.385	730.887	731.355	682.025	692.086	737.261	716.67	759.893
	731.115	506.311	700.848	726.307	695.535	649.678	693.205	731.707	730.295	743.109
	729.784	683.462	718.168	717.391	656.656	628.724	703.951	707.956	715.329	745.607
	727.31	692.712	725.722	720.721	652.174	693.93	700.981	700.676	710.788	757.807
	724.535	694.215	708.356	660.112	666.126	370.438	711.646	689.151	700.339	759.016
	727.125	706.26	670.828	701.169	657.377	481.339	705.203	692.001	690.93	756.258
	710.963	717.703	695.792	699.322	686.374	362.931	700.664	671.792	695.967	758.096
	737.275	721.326	617.309	692.493	683.787	346.205	685.906	674.123	711.449	754.077
	722.454	585.525	678.067	718.518	690.481	333.405	673.466	682.737	706.748	765.367
	707.06	499.603	659.093	734.119	681.514	331.172	673.737	691.669	705.003	766.542
	705.735	658.113	663.965	711.524	704.602	345.197	667.972	708.164	688.446	773.564
	721.449	704.676	701.96	718.482	696.084	655.462	700.327	693.185	674.398	771.704
	701.648	692.281	706.812	699.169	664.1	677.367	704.417	694.111	673.337	770.901
	682.572	682.742	702.558	697.329	648.6	351.125	677.339	691.02	707.965	771.65
	677.929	707.863	710.57	708.269	655.34	368.177	682.927	684.732	692.049	756.646
	690.491	712.435	718.964	704.241	673.408	372.379	681.922	692.168	692.6	771.908
	688.923	718.353	698.111	730.771	674.85	346.284	656.911	665.202	668.498	760.538
	697.604	709.173	709.01	726.266	650.835	384.263	615.369	673.087	664.063	745.933
	683.916	696.628	711.101	706.244	660.914	335.196	712.934	707.875	674.83	757.714
	681.646	681.212	707.45	723.453	674.054	320.71	702.165	677.949	689.805	758.359
	705.068	659.202	710.939	730.525	701.381	368.89	729.761	663	715.968	750.616
	697.864	657.315	686.246	733.441	668.718	397.247	711.238	679.234	733.206	747.728
	680.724	652.136	618.106	705.687	603.276	391.865	691.856	663.387	736.821	751.769
	683.495	655.075	636.008	726.184	623.472	390.18	704.478	680.105	740.741	753.936
	700.483	652.406	684.705	710.424	595.726	392.224	690.778	672.933	737.745	754.544
	738.442	616.896	698.222	673.028	575.57	366.486	673.896	695.278	740.622	750.579
	734.842	557.469	697.316	695.193	597.435	351.581	618.871	694.185	740.896	746.26
	704.974	550.231	712.388	687.724	605.312	313.012	655.317	688.242	747.483	750.497
	692.924	558.154	699.059	713.812	620.131	357.272	590.551	717.986	747.058	759.494
	686.478	552.771	663.326	631.546	553.984	374.931	622	707.06	750.516	744.181
	673.714	563.295	655.096	585.912	557.08	350.268	607.421	703.635	750.652	754.039
	694.185	533.524	668.453	559.378	597.946	398.043	645.525	703.672	741.605	747.236
	668.253	538.239	650.838	554.541	555.413	458.497	641.381	733.683	754.717	748.855
	673.58	560.282	635.946	588.866	533.388	407.465	707.103	728.521	750.682	581.07
	660.939	586.181	623.321	533.752	521.766	396.95	729.989	726.906	745.659	736.177
	677.351	669.353	632.963	552.128	547.823	380.595	686.975	725.011	744.046	745.109
	677.419	601.995	622.482	501.258	585.214	416.993	670.894	729.161	734.509	746.172
	656.78	581.588	628.71	495.16	510.521	384.212	682.788	744.513	736.928	748.397
	670.306	596.469	618.119	503.575	539.476	372.077	704.131	718.544	745.686	749.321
	653.562	555.584	609.445	519.19	597.513	645.019	683.009	734.022	754.09	764.212
	636.171	531.469	614.469	493.889	546.333	658.378	644.701	727.788	759.185	759.494
	682.676	552.073	639.508	489.322	532.59	653.415	628.88	655.599	759.198	755.409
	741.146	547.351	666.296	495.842	552.549	669.371	593.64	690.625	756.616	722.626
	734.768	537.449	638.004	534.957	553.269	674.157	588.741	714.436	750	722.467
	747.26	539.36	634.243	626.522	652.593	687.879	566.865	704.365	750	732.298
	759.821	586.054	618.776	604.77	613.143	682.977	629.969	731.707	750	714.983
	743.425	531.215	628.624	619.897	600.472	399.057	605.073	704.233	747.053	733.986
	737.223	554.917	639.404	643.314	579.06	691.943	600.526	745.275	740.923	716.929
	739.74	596.281	624.78	559.77	679.458	655.132	591.028	751.026	753.275	720.121
	749.69	633.52	554.838	507.519	585.146	673.088	635.697	750.283	750.692	732.683
	747.849	602.703	554.818	490.898	663.37	663.069	597.906	728.785	750.232	722.044
	733.37	625.867	547.987	479.296	613.45	681.363	634.164	735.302	734.051	725.894
	737.414	613.271	540.761	473.373	578.647	659.413	633.734	725.254	687.271	739.503
	753.233	628.702	553.455	561.845	591.815	663.536	580.694	726.682	690.557	720.824
	749.345	628.108	542.132	482.135	582.617	671.246	562.054	708.114	684.718	712.421
	728.119	629.055	526.714	455.419	659.047	689.405	552.045	709.213	663.055	722.594
	726.539	624.463	563.011	452.063	686.769	685.752	640.522	707.577	664.33	732.604
	721.905	617.34	519.467	470.624	629.112	692.224	594.302	704.639	671.572	719.708
	712.389	618.932	532.291	457.414	661.298	707.737	543.55	727.872	653.003	707.983
	704.543	613.942	521.792	448.575	611.146	721.572	538.415	751.636	656.048	700.92
	708.22	610.376	529.734	525.415	597.976	703.391	533.076	754.812	654.92	703.236
	700	616.819	529.685	458.96	664.732	713.662	574.584	750	626.735	705.003
	698.659	651.999	538.731	439.927	709.946	685.549	556.034	748.239	654.061	702.367
	698.133	606.318	505.729	440.506	679.163	716.825	612.141	744.012	642.509	720.826
	700.538	589.288	515.23	434.189	675.655	736.097	556.816	744.237	654.894	727.862
	734.314	560.624	518.47	434.43	671.161	714.674	590.785	741.466	652.81	733.496
	737.327	549.779	540.376	568.467	739.835	702.058	544.437	742.288	651.566	720.978
	738.112	547.803	569.553	484.017	691.295	712.281	583.764	724.782	658.905	710.478
	729.101	541.339	636.338	455.581	707.353	713.782	602.299	741.228	694.341	706.749
	708.444	545.281	581.759	441.11	747.066	719.631	585.381	748.351	680.416	715.019
	745.834	588.819	524.932	446.492	728.904	718.094	564.007	742.369	660.154	713.068
	765.846	518.246	499.005	464.876	743.159	722.892	565.888	744.631	677.091	719.709
	741.563	525.913	531.081	461.983	721.976	724.228	596.53	721.38	670.216	726.271
	726.876	541.006	514.136	460.547	684.327	721.131	598.652	727.162	666.598	724.072
	731.744	639.974	516.437	521.464	655.738	726.274	582.165	742.996	665.78	712.654
	722.637	623.359	611.311	468.821	647.651	723.92	572.063	738.108	660.94	719.178
	726.063	550.223	522.829	479.699	649.508	724.294	593.059	737.894	656.8	720.148
	702.583	531.081	517.504	481.672	622.605	717.426	607.135	736.711	653.753	720.081
	730.947	566.885	532.017	488.002	599.1	717.696	572.207	736.766	653.193	720.328
	714.207	542.704	525.084	633.014	621.225	717.595	552.258	735.444	656.425	720.143
	723.448	525.512	575.197	680.5	621.216	721.921	552.397	734.844	646.63	722.163
	733.037	535.107	523.512	669.714	617.147	719.499	530.249	731.411	643.678	719.875
	706.13	523.345	506.24	649.6	677.322	722.074	532.104	740.545	638.856	730.835
	699.394	516.87	512.587	725.242	650.759	716.891	510.272	729.669	627.632	720.757
	709.628	522.979	524.508	705.919	608.545	718.483	511.214	716.524	629.51	705.368
	701.908	529.278	532.312	656.899	685.889	721.214	512.764	705.956	665.006	707.54
	721.545	609.756	536.508	550.318	652.208	706.922	513.006	717.346	693.732	710.65
	744.921	598.981	618.589	469.345	601.284	720.6	543.028	694.559	687.289	712.22
	754.66	558.406	520.529	477.722	625.346	723.885	529.626	716.058	670.56	704.376
	756.494	481.429	496.719	514.538	638.231	715.447	554.014	711.424	663.252	733.925
	726.787	482.447	494.454	521.212	632.588	701.954	580.775	708.052	650.872	734.142
	711.269	586.575	556.592	686.594	632.398	708.953	568.691	695.634	659.854	719.409
	696.235	566.295	524.719	700.745	610.583	725.53	574.061	697.674	645.856	716.668
	709.335	496.296	542.652	524.084	606.245	723.291	575.158	680.636	649.248	716.676
	706.273	460.746	565.581	647.508	627.777	723.543	582.436	709.135	649.941	715.967
	742.098	488.179	551.644	576.774	615.089	706.782	583.919	695.22	665.181	721.66
	749.077	495.692	548.129	718.062	648.814	692.483	629.445	698.45	704.624	739.664
	749.75	511.346	558.267	525.463	698.963	691.862	620.872	696.056	670.569	737.378
	744.598	586.073	625.385	510.115	670.119	681.571	607.399	700.174	649.004	712.485
	755.773	590.533	563.893	456.043	650.324	706.025	560.691	666.322	653.96	707.605
	758.142	513.136	620.932	499.118	639.372	679.915	572.595	677.768	656.455	709.341
	753.817	521.994	578.142	472.298	617.913	692.092	549.134	694.444	621.874	699.136
	760.521	530.247	537.721	493.69	649.684	717.853	542.479	683.178	650.389	704.992
	767.311	538.294	523.656	518.205	659.573	681.993	553.668	697.244	562.852	709.617
	760.089	562.869	543.528	559.233	661.441	671.066	579.813	682.386	540.292	700.143
	773.538	646.766	551.447	530.834	641.091	673.181	545.455	674.833	556.681	710.04
	760.088	664.678	544.652	611.874	664.005	662.599	493.737	713.073	600.369	703.1
	768.273	668.151	540.623	596.515	703.089	670.56	493.645	728.105	686.176	725.831
	767.933	645.911	535.632	586.176	695.032	662.407	482.557	724.214	622.335	710.685
	752.627	617.638	581.077	584.533	689.132	699.482	486.802	721.781	655.456	703.27
	755.149	640.397	527.299	668.389	681.041	661.374	568.491	733.044	629.269	695.389
	731.191	652.274	516.609	716.357	672.927	645.063	484.775	735.639	638.477	713.089
	738.735	647.637	518.548	581.685	663.858	655.554	471.727	737.636	625.624	703.27
	731.409	647.4	515.959	502.171	670.613	621.699	518.029	726.23	617.902	698.557
	723.512	641.522	536.012	645.414	661.843	623.795	483.993	725.372	674.56	698.846
	723.694	635.786	602.796	658.786	653.032	612.624	487.386	723.412	627.594	701.717
	730.155	640.114	541.308	611.617	647.573	656.434	511.146	722.711	634.171	705.024
	719.381	654.386	530.394	672.208	655.589	618.682	495.817	718.434	624.712	704.632
	707.307	652.789	510.394	651.132	659.269	607.985	537.259	734.336	625	718.476
	709.255	651.778	658.033	590.481	637.042	614.097	509.554	738.212	668.068	712.303
	744.099	669.062	728.827	552.279	647.008	612.307	492.701	730.666	615.5	714.092
	789.629	671.042	698.942	711.903	630.038	586.923	499.264	737.322	594.515	710.118
	800	650.184	693.843	717.88	668.448	621.243	512.715	740.741	593.272	704.952
	791.092	528.212	631.832	764.254	650.588	640.328	543.632	733.156	584.687	698.976
	784.854	546.704	586.359	748.371	634.45	600.797	536.472	730.471	608.828	697.075
	775.844	538.502	572.719	726.633	626.568	609.091	505.386	736.391	580.805	704.501
	759.839	559.809	567.182	720.921	635.659	607.373	554.938	740.226	557.761	701.892
	779.009	553.344	500.537	719.546	707.617	612.183	494.497	735.751	546.176	703.572
	768.091	585.026	521.871	728.411	696.372	597.573	497.39	738.992	566.905	694.605
	758.511	588.566	515.334	725.499	681.704	600.607	564.977	741.907	517.033	685.262
	753.255	560.354	533.184	727.628	688.818	622.227	536.12	739.241	529.278	698.999
	765.472	561.746	568.007	724.01	677.649	614.407	494.715	729.523	523.382	707.46
	747.749	589.955	530.111	731.707	671.995	627.336	512.06	730.928	527.356	695.561
	743.985	578.934	528.19	737.811	672.307	637.43	518.477	740.363	599.483	714.327
	776.817	560.861	541.362	738.931	681.968	665.51	549.15	740.059	570.528	706.977
	757.185	570.225	553.846	724.346	708.983	647.187	619.847	736.611	550.905	705.491
	734.68	548.903	646.075	693.764	694.721	613.125	538.922	731.79	554.934	708.83
	766.833	563.95	516.012	724.685	670.22	636.706	556.311	740.236	570.012	708.341
	771.094	528.306	531.192	709.985	679.922	625.71	589.711	738.37	573.347	722.15
	757.584	530.182	507.871	742.931	736.302	607.193	594.991	729.847	559.254	719.828
	710.517	610.633	630.749	729.385	747.815	615.928	565.781	744.806	591.194	719.8
	732.495	571.747	562.578	730.897	692.959	593.907	592.975	746.467	588.509	727.919
	682.094	645.408	580.685	752.446	731.824	605.846	591.934	724.43	569.266	734.346
	674.259	666.094	579.246	733.06	734.311	597	605.174	726.474	579.651	731.707
	670.8	691.421	576.746	743.721	739.903	553.432	583.058	732.406	582.969	731.707
	666.565	680.318	568.677	740.701	742.948	552.423	573.034	723.992	606.892	731.707
	656.744	684.256	580.47	739.907	743.696	570.225	588.749	715.195	639.361	735.546
	684.814	686.133	604.343	743.162	742.313	567.354	603.426	707.156	652.745	738.611
	707.682	675.222	590.372	725.24	724.469	586.631	607.009	701.495	641.558	739.661
	726.06	671.497	577.956	737.322	741.193	566.067	596.156	721.894	642.857	729.005
	747.846	662.45	559.092	735.047	744.439	572.808	598.724	736.032	650.945	728.832
	672.721	641.94	541.031	754.532	746.208	572.414	616.098	704.927	705.113	730.542
	636.621	646.45	582.171	741.739	745.304	625.096	557.801	704.616	689.016	729.483
	647.981	665.215	554.903	739.102	737.81	657.443	587.216	704.495	670.811	729.341
	638.878	652.776	582.167	726.959	745.573	612.895	567.039	702.997	649.435	725.085
	688.842	641.361	522.474	731.258	746.786	617.365	526.027	692.027	652.174	719.518
	635.782	633.684	507.451	702.178	740.147	637.606	557.219	695.257	655.202	729.725
	664.845	669.358	516.109	724.614	755.075	637.616	521.897	686.174	645.196	725.642
	694.503	653.04	572.008	705.255	749.414	639.756	547.904	666.495	641.216	732.84
	671.879	646.703	528.406	700.053	746.888	645.607	581.137	700.389	638.895	730.279
	722.45	644.736	571.803	742.055	746.408	647.569	614.684	688.301	630.016	727.643
	750.747	649.02	562.481	720.401	740.478	662.476	592.175	684.987	660.052	740.741
	777.467	645.523	660.114	732.717	742.441	623.392	554.742	684.203	652.35	740.741
	773.985	672.296	616.544	731.975	733.035	616.749	588.473	703.754	636.497	740.741
	774.596	660.738	582.215	746.83	739.862	620.9	603.616	728.155	623.97	742.531
	771.989	670.018	680.643	732.486	740.476	617.207	589.546	706.886	636.287	740.741
	771.914	653.131	695.343	727.583	738.909	619.433	575.583	698.763	630.691	722.236
	764.398	636.228	685.793	745.815	737.173	612.028	587.137	690.428	633.429	699.113
	757.833	626.344	650.37	733.663	741.537	619.71	579.256	660.709	633.824	694.659
	762.449	637.2	608.519	743.445	744.054	646.58	583.15	665.818	621.22	680.89
	758.117	621.557	634.461	728.027	746.85	614.934	575.119	643.365	606.397	655.671
	771.365	630.169	676.953	713.517	744.703	594.27	551.543	656.841	638.588	661.014
	761.85	638.625	669.774	726.917	747.922	575.845	589.606	683.087	621.698	647.803
	759.631	692.878	689.937	679.851	746.338	588.422	598.368	651.361	602.059	668.824
	748.887	620.867	691.199	738.737	747.382	596.657	608.466	661.412	593.05	676.61
	755.525	636.692	668.804	736.5	750.352	613.174	579.197	653.484	603.186	668.634
	743.451	625.315	533.711	691.304	749.826	558.027	628.451	675.134	627.609	666.36
	743.487	607.78	701.381	710.557	745.799	599.513	661.75	654.545	613.116	692.631
	750.228	604.627	710.383	730.781	729.959	553.126	665.702	651.595	605.774	743.435
	739.842	607.25	708.447	733.496	745.796	583.055	651.051	656.643	614.159	742.552
	728.799	612.312	710.354	734.161	747.085	546.938	672.43	653.884	616.74	712.345
	733.222	685.714	712.29	721.829	752.232	594.905	682.251	643.709	613.945	695.274
	718.11	543.567	712.232	702.875	739.852	548.001	709.527	657.434	618.164	685.056
	717.688	542.973	716.82	697.86	735.818	578.204	697.674	671.995	639.866	692.679
	715.736	610.916	709.857	717.696	712.275	591.178	695.883	676.099	642.163	671.688
	754.785	598.765	711.542	728.635	706.441	605.561	700.841	677.828	634.392	672.321
	768.233	541.257	712.271	685.287	703.012	638.571	698.964	670.898	638.593	675.166
	751.019	637.454	721.395	714.212	699.975	626.503	689.868	675.932	604.205	687.679
	748.005	551.599	716.477	693.554	704.76	598.572	649.9	704.662	622.49	707.251
	698.302	531.081	700.096	681.818	706.628	571.63	656.024	687.036	604.778	530.044
	744.351	584.205	652.5	679.817	710.192	672.976	623.542	670.13	585.623	337.044
	766.773	574.858	650.246	684.641	705.404	688.375	586.693	668.041	606.532	723.969
	772.224	687.735	638.083	687.592	710.735	679.065	594.12	656.24	608.326	732.555
	764.16	685.478	659.134	691.643	755.873	664.04	620.785	675.997	590.258	728.353
	768.646	527.033	623.933	689.405	753.931	662.342	683.015	656.668	614.392	725.442
	738.157	677.736	692.172	694.594	743.692	676.279	682.029	650.694	642.97	723.869
	731.421	691.961	697.077	665.316	753.312	685.714	685.327	661.494	629.52	725.557
	663.034	681.676	690.987	659.673	732.179	690.548	693.498	650.636	609.693	707.737
	645.518	663.051	691.704	665.088	744.252	679.418	696.144	654.462	644.738	711.725
	635.132	679.392	684.499	666.7	745.964	691.484	701.956	660.89	641.447	701.564
	737.018	680.224	680.901	652.502	751.704	688.853	692.661	650.766	636.536	713.498
	662.346	676.137	695.615	655.721	731.754	697.008	693.808	672.521	667.249	715.745
	663.244	521.061	678.04	700.828	740.062	696.759	672.134	657.223	621.695	701.682
	662.632	527.669	709.098	690.784	756.178	696.164	698.417	650.689	602.918	693.76
	659.172	688.673	668.44	619.755	750.778	705.882	695.876	658.326	584.814	710.955
	653.621	535.659	707.934	589.767	757.779	708.624	693.421	658.971	667.567	709.601
	655.415	683.749	705.653	555.959	752.387	709.227	697.76	657.08	614.238	700.506
	647.835	687.421	689.442	608.225	738.262	709.205	695.917	642.107	632.025	695.94
	714.961	667.742	684.358	554.179	731.515	709.893	701.42	695.109	622.951	695.978
	660.639	574.867	680.404	554.447	736.278	706.07	696.107	674.5	652.725	694.852
	650.018	666.857	505.796	529.715	747.606	708.079	698.202	641.973	649.336	694.035
	671.574	668.515	664.472	522.25	755.61	695.801	700.508	649.372	693.562	712.352
	684.582	655.703	670.32	514.867	742.972	699.708	694.528	652.14	720.63	703.446
	643.007	673.065	679.388	547.112	734.367	691.553	698.351	640.331	722.657	693.661
	658.141	576.859	691.104	499.333	740.195	694.809	701.453	626.994	725.689	690.661
	688.318	673.23	703.802	482.403	744.268	689.231	702.015	617.48	735.985	694.087
	740.538	683.707	674.603	517.857	708.252	693.038	699.541	673.852	751.928	728.434
	719.745	645.126	649.902	482.427	736.521	698.206	700.994	643.671	747.833	707.209
	676.908	597.435	690.16	494.543	745.445	701.961	696.535	634.58	738.633	714.286
	649.874	599.455	704.234	504.696	748.026	701.833	696.481	654.873	732.193	718.672
	633.033	577.78	650.406	471.698	713.042	701.886	702.654	633.213	728.459	679.896
	637.2	577.069	647.645	469.982	706.7	703.174	709.39	661.665	732.768	725.258
	619.967	574.618	686.108	504.049	687.342	703.481	704.123	707.795	730.365	696.547
	647.794	574.177	663.823	475.517	684.399	707.798	693.728	716.496	729.889	717.458
	623.145	634.167	698.761	480	685.501	705.802	687.742	720.85	730.726	699.597
	698.004	629.964	686.801	482.787	750.434	694.66	701.119	719.44	738.621	691.573
	677.722	589.403	699.301	469.178	742.574	698.905	700.449	726.06	737.395	684.798
	695.985	608.193	693.388	473.038	752.608	695.375	702.888	724.327	733.401	688.853
	678.782	622.471	706.746	489.433	751.246	679.612	703.167	726.722	751.618	700.263
	664.445	612.776	698.679	559.485	713.755	671.039	692.699	731.245	746.934	683.329
	686.255	620.147	714.08	547.489	722.812	669.856	696.718	733.714	741.921	676.084
	670.815	677.716	718.686	471.555	725.934	683.816	693.157	733.001	748.07	673.485
	654.234	662.637	709.769	469.781	715.283	693.739	696.523	731.827	743.326	660.591
	663.273	646.05	697.604	473.469	681.386	700.141	694.827	728.788	735.431	666.597
	672.251	632.87	698.495	493.626	667.216	709.674	692.282	730.549	741.537	648.665
	683.451	634.515	692.615	448.802	647.08	552.324	693.956	731.971	736.356	674.021
	690.386	649.797	708.047	451.949	704.532	721.595	696.717	731.707	731.59	654.689
	664.039	653.615	693.599	493.117	688.579	703.835	684.564	730.654	745.678	678.104
	654.744	674.983	708.472	479.393	622.049	699.096	658.135	736.057	748.946	680.738
	634.697	634.761	703.25	468.988	666.815	685.804	637.212	737.947	746.069	675.192
	648.288	628.67	700.558	520.607	677.078	659.055	642.834	739.952	739.773	662.048
	606.367	653.951	700.773	612.212	596.037	687.688	611.503	738.066	744.241	674.263
	635.035	653.193	696.524	677.142	582.285	707.454	593.528	734.656	739.253	672.795
	623.822	644.563	681.96	694.514	599.878	702.959	637.168	746.824	746.49	677.368
	637.975	625.392	691.489	633.759	567.34	710.66	628.842	746.069	737.047	669.856
	721.571	611.52	695.652	614.168	577.25	706.397	586.285	740.741	743.802	694.179
	671.879	593.023	666.898	581.646	559.356	700.31	631.45	728.848	724.66	681.501
	662.413	613.897	674.779	632.866	539.991	696.757	611.663	738.441	738.574	671.203
	667.95	592.279	669.587	600.032	583.173	696.934	592.405	742.62	730.509	667.408
	667.525	596.004	691.817	558.11	549.352	701.774	642.361	744.434	731.053	687.54
	690.456	610.27	676.692	568.854	534.727	654.908	616.269	734.578	727.579	664.039
	680.512	618.195	680.851	548.7	540.873	662.231	609.231	737.327	729.307	659.241
	693.659	648.797	650.022	549.898	537.186	660.494	645.267	742.338	739.79	684.504
	707.49	590.551	690.181	558.477	541.967	668.158	656.901	737.882	724.646	707.985
	727.107	530.437	696.448	713.398	559.89	677.214	612.528	743.529	728.406	725.573
	705.23	578.993	690.605	621.66	598.38	683.176	635.6	739.523	702.135	704.46
	663.122	627.672	699.973	673.175	728.504	659.492	595.406	736.912	720.456	697.005
	664.358	655.521	693.85	553.46	611.643	645.802	614.723	738.415	719.539	729.1
	662.165	615.705	669.122	480.389	533.209	634.249	593.787	739.29	724.219	727.749
	675.807	505.23	635.906	608.779	592.762	632.967	602.969	737.197	726.182	726.719
	649.96	513.73	630.414	664.83	526.063	663.614	643.996	728.509	731.513	715.451
	657.854	581.524	595.316	635.762	593.491	643.314	610.757	729.427	723.119	428.344
	697.886	539.697	596.434	598.715	547.207	636.528	599.395	729.819	733.641	691.746
	734.089	597.483	539.83	595.917	529.122	631.261	607.321	730.57	722.892	718.14
	743.104	658.36	569.927	672.322	525.057	626.486	622.859	734.59	730.025	685.637
	723.128	635.441	586.399	727.46	578.993	618.399	639.876	730.424	730.145	714.381
	736.023	593.321	553.163	724.743	541.982	615.298	612.628	736.056	720.588	721.105
	743.646	495.382	554.938	754.976	525.336	642.331	581.844	726.452	719.728	710.318
	696.112	619.526	545.256	764.456	544.814	615.68	568.303	733.82	716.063	720.721
	666.667	606.32	601.268	740.551	567.814	588.622	574.85	737.268	722.125	720.867
	643.292	614.28	585.66	737.981	559.417	601.942	569.175	740.741	722.701	713.162
	679.05	555.612	601.024	697.275	560.395	623.55	564.302	738.452	727.213	716.23
	687.176	564.834	611.004	721.499	589.555	566.181	587.453	735.817	724.975	708.02
	637.494	538.676	616.384	729.803	688.415	567.65	649.197	738.348	728.951	730.223
	631.418	670.983	615.794	728.294	662.056	555.756	614.026	729.568	733.601	678.775
	637.168	663.391	620.795	737.846	643.074	565.233	597.444	733.436	739.409	711.9
	682.81	539.36	654.811	739.533	599.235	605.744	592.457	732.919	749.209	694.716
	749.446	534.18	629.04	730.024	575.532	585.381	593.819	734.679	707.035	703.885
	698.835	665.139	539.503	740.662	571.226	601.871	580.497	731.62	712.492	677.927
	704.68	697.674	521.925	741.18	613.058	572.962	605.147	736.679	703.744	680.763
	759.494	703.044	671.609	741.767	596.446	564.8	622.753	738.916	738.356	644.694
	765.052	689.96	685.735	751.92	580.909	530.914	628.456	731.276	739.119	700.837
	734.617	707.159	567.719	748.951	717.659	529.959	603.244	721.145	730.704	667.956
	726.75	707.119	521.739	748.408	611.485	531.704	562.367	735.039	707.871	691.571
	714.17	695.61	519.847	746.901	582.043	531.734	585.486	732.798	736.619	631.321
	755.455	697.58	510.23	750	547.636	539.326	603.122	728.032	711.959	689.16
	748.593	698.251	513.34	755.676	553.748	634.354	591.996	734.39	731.155	708.521
	748.224	675.05	530.786	738.276	565.174	361.427	558.865	728.147	718.46	704.674
	748.119	651.836	586.457	731.068	597.061	368.691	561.867	736.561	711.633	677.787
	745.434	704.218	516.34	738.67	647.339	537.667	565.581	731.624	731.19	692.913
	746.945	707.738	519.757	715.215	577.081	474.553	545.059	722.081	703.151	673.102
	741.617	684.743	507.502	699.634	560.397	367.457	537.101	694.888	713.985	680.092
	726.876	683.001	520.341	715.611	564.224	359.61	543.473	708.863	691.68	653.019
	742.043	687.798	557.717	684.208	599.007	373.737	552.954	695.4	685.976	707.681
	748.675	677.273	568.792	725.483	628.874	389.203	579.578	686.035	704.029	698.419
	749.036	677.989	540.266	734.476	630.59	411.3	549.401	695.634	694.071	694.812
	753.968	700.827	545.758	740.172	574.249	360.828	569.479	687.598	702.606	676.158
	757.95	692.057	573.277	738.666	606.343	379.724	607.526	690.222	720.766	692.869
	738.878	677.419	513.262	747.664	560.489	383.113	607.253	688.145	711.813	680.238
	734.406	674.831	511.501	739.811	557.81	619.25	517.326	669.831	748.755	687.994
	723.811	666.805	508.501	749.026	573.178	467.381	507.576	705.665	737.02	685.036
	716.172	687.368	503.386	746.286	689.335		524.985	665.856	726.021	694.609
	700.214	674.043	508.808	736.901	608.087	388.282	524.852	679.852	728.218	703.214
	674.599	513.724	511.966	710.614	558.634	376.784	498.051	669.393	718.254	673.564
	667.422	538.649	527.113	743.569	559.28	379.919	511.45	654.099	676.787	703.073
	678.943	515.386	582.436	754.063	548.655	430.99	505.609	668.702	683.488	685.55
	663.917	704.549	531.269	742.55	535.086	373.167	501.317	656.865	677.711	680.01
	666.532	692.696	477.504	722.317	545.863	530.089	482.555	648.153	714.008	700.791
	640.548	505.984	491.675	729.991	590.666	487.907	499.546	641.554	713.807	710.135
	643.822	703.602	477.527	727.957	653.013	491.579	483.378	692.789	709.513	713.656
	638.749	696.51	475.392	702.469	652.91	495.014	482.379	659.507	681.54	745.611
	629.666	680.864	462.758	679.382	636.596	489.557	503.397	651.012	686.916	713.112
	699.574	674.441	456.369	605.719	644.528	512.54	523.194	639.064	681.818	735.963
	672.49	690.022	450.048	664.017	656.25	484.251	512.525	646.28	687.987	721.678
	662.916	687.578	450.837	613.834	712.018	502.758	556.428	645.619	669.779	709.873
	669.528	680.695	498.278	676.136	705.197	492.84	511.656	634.413	687.129	696.301
	667.8	699.16	465.258	597.718	690.852	522.952	531.672	657.578	687.953	692.252
	689.551	697.674	456.053	576.599	654.166	505.179	510.69	681.164	696.987	709.501
	697.269	697.524	448.963	566.668	675.476	503.704	491.778	684.261	698.962	705.726
	682.711	708.769	623.627	581.082	617.485	512.286	522.188	661.048	708.419	727.917
	672.738	709.597	489.278	575.457	622.032	543.309	484.042	679.477	777.795	708.596
	681.238	714.286	449.541	602.25	600.192	525.543	493.989	705.799	785.888	717.757
	677.72	715.843	443.742	570.263	579.951	501.637	589.218	711.564	765.068	713.732
	716.232	713.306	493.142	592.432	614.09	501.258	504.202	709.312	752.506	696.92
	705.005	715.282	465.892	615.952	663.791	561.928	494.548	714.555	740.516	725.894
	714.577	718.816	452.913	643.757	605.663	596.866	490.582	726.254	751.336	735.222
	700.512	725.152	452.635	570.769	634.196	528.515	524.428	729.211	747.549	661.598
	673.908	715.807	458.482	616.578	599.938	520.568	504.253	729.209	759.793	703.178
	659.679	702.49	502.222	556.453	568.865	526.694	504.304	719.092	753.801	704.561
	653.38	702.016	564.024	516.176	561.677	532.373	478.909	698.998	746.753	731.843
	656.502	684.483	473.062	507.723	593.849	532.231	488.028	697.53	738.993	727.476
	656.038	640.825	465.911	532.041	637.872	552.492	545.234	672.296	747.587	614.283
	679.659	705.295	504.151	534.932	594.059	555.556	520.178	729.889	752.253	690.603
	718.33	680.908	501.044	591.903	564.684	548.964	496.093	734.089	736.813	677.51
	650.18	706.602	463.449	541.446	561.822	562.047	527.299	723.356	719.527	680.327
	616.05	704.644	630.889	526.074	573.71	558.754	482.978	680.369	711.327	678.25
	653.032	695.364	513.392	536.026	551.493	555.977	487.704	688.03	696.883	680.016
	629.594	738.075	446.363	586.104	600.227	556.16	492.12	687.408	704.203	687.878
	639.329	717.38	451.367	663.31	622.784	552.324	541.303	708.566	666.921	724.821
	634.166	708.751	458.661	682.697	577.251	559.335	556.908	683.592	677.612	739.635
	636.492	717.587	480.823	682.917	536.093	575.903	493.865	699.54	709.75	689.616
	687.831	722.713	512.976	682.401	533.603	585.321	491.702	715.585	727.336	687.984
	646.552	727.539	549.92	732.824	610.641	563.164	510.443	738.66	709.571	711.242
	642.392	727.063	572.712	735.106	556.575	553.846	509.888	734.277	715.326	693.155
	631.355	735.568	566.992	666.223	645.124	555.615	504.309	724.811	718.245	700.586
	679.354	733.138	561.741	604.903	579.74	571.688	513.32	701.643	715.801	699.054
	651.466	729.266	517.763	588.575	642.134	531.279	535.849	721.933	722.25	698.345
	647.975	735.786	550.515	578.831	617.305	525.916	504.173	713.329	718.376	696.147
	625.443	731.186	518.952	572.9	637.653	536.449	504.484	698.984	730.286	678.797
	675.505	737.078	568.99	564.334	635.163	528.34	529.302	698.712	726.733	657.102
	663.669	724.964	587.114	576.246	629.025	523.565	513.222	742.984	737.285	659.871
	624.747	720.688	527.113	568.825	651.035	512.401	533.211	696.734	728.613	669.442
	702.352	717.73	655.525	599.201	680.993	510.871	504.536	645.161	726.744	710.389
	634.612	717.943	592.46	609.661	672.653	533.11	505.108	678.816	728.376	720.799
	621.443	696.344	533.401	542.945	645.161	525.968	515.438	714.205	733.471	694.783
	618.922	708.17	557.942	564.001	660.648	584.317	549.6	745.319	711.628	701.618
	616.491	718.05	529.18	559.672	634.304	523.925	559.707	747.601	721.344	675.359
	692.382	701.013	520.178	559.683	690.826	524.772	545.565	709.094	703.339	684.78
	678.774	706.31	518.846	549.512	667.585	532.86	543.385	743.363	704.991	676.964
	651.533	709.056	548.097	537.168	645.862	532.027	614.382	740.29	716.028	657.015
	592.267	711.606	540.486	588.235	691.913	532.752	598.19	749.2	699.053	691.17
	757.481	717.222	524.29	662.862	672.989	532.772	570.241	742.671	724.787	691.429
	753.222	710.678	541.983	679.721	650.047	544.755	551.527	744.113	731.707	689.002
	750	711.158	569.034	675.621	647.471	533.495	519.204	742.163	735.335	688.371
	749.717	712.672	617.678	701.113	660.664	548.167	521.979	714.698	735.862	679.809
	754.363	713.413	491.616	666.01	668.041	551.933	550.292	743.134	723.865	678.053
	753.564	708.07	505.066	602.891	659.133	547.296	518.282	728.745	698.399	665.59
	756.182	701.913	508.911	574.663	650.719	544.824	541.719	739.671	731.467	675.732
	747.617	717.276	549.985	557.639	678.224	640.649	506.627	729.859	716.553	665.405
	739.99	722.011	492.027	567.407	684.814	525.568	554.266	716.361	719.918	650.451
	769.621	720.905	489.072	546.436	664.479	563.624	556.626	720.492	733.781	677.259
	774.693	716.618	506.905	544.38	660.617	597.977	511.45	735.23	734.477	694.037
	758.529	730.474	580.125	520.112	670.685	553.856	525.118	736.434	736.556	687.809
	759.257	731.073	569.253	544.679	668.751	585.751	621.457	729.609	732.858	703.738
	767.992	705.938	556.265	511.501	720.642	528.224	527.859	730.055	735.005	693.114
	768.394	705.529	587.659	547.917	677.863	425.253	515.22	725.875	731.409	728.077
	748.838	712.976	631.293	556.644	673.34	345.073	519.159	729.086	720.875	707.431
	766.716	694.756	615.96	521.739	673.066	609.096	544.981	733.536	717.104	731.212
	760.559	694.811	605.385	489.022	678.864	526.673	572.909	738.315	721.709	272.109
	733.704	731.887	611.894	490.629	668.404	543.381	547.307	743.433	723.149	718.522
	750.888	725.219	590.352	530.621	666.454	537.748	548.733	743.498	731.329	721.735
	749.596	664.183	596.791	510.199	663.208	447.706	569.611	740.741	739.989	715.681
	756.251	709.891	564.699	514.612	711.08	397.167	588.295	737.966	724.582	714.064
	758.867	703.56	610.169	592.04	728.534	386.259	585.981	742.347	691.173	716.343
	763.259	703.874	576.923	666.387	734.41	402.598	549.317	736.623	681.371	719.961
	767.027	681.745	586.264	664.693	739.534	395.556	581.36	739.187	680.57	721.154
	762.596	690.445	563.654	671.584	742.242	398.725	612.981	741.832	674.194	719.459
	762.463	641.095	526.847	703.756	744.464	356.31	637.58	728.371	658.474	715.306
	761.228	679.612	519.062	592.146	744.726	379.381	637.3	723.726	653.819	712.533
	760.712	668.534	551.292	540.693	744.475	356.848	662.87	709.784	649.502	712.768
	759.195	683.649	612.058	589.298	750	350.151	673.721	736.292	645.846	718.21
	756.942	669.326	570.408	524.907	742.374	384.919	677.332	735.546	682.991	715.699
	757.211	678.514	559.395	508.422	738.363	386.649	681.31	736.196	649.173	708.089
	743.514	660.044	603.487	515.21	746.233	597.397	687.936	736.836	659.375	714.718
	757.624	595.167	587.04	533.248	745.031	551.108	688.204	717.927	642.911	713.202
	767.223	529.608	591.149	559.124	724.396	562.595	683.075	701.695	630.531	703.697
	764.967	665.592	602.497	543.558	702.791	574.701	693.25	694.053	647.935	708.453
	682.843	522.796	575.621	543.46	683.106	626.855	697.42	695.553	647.595	696.257
	763.663	665.259	592.465	554.729	667.279	594.183	588.51	695.055	615.693	702.706
	759.7	548.956	527.299	555.696	684.023	602.718	688.835	687.444	675.624	694.331
	766.153	540.151	628.615	504.767	691.282	570.629	679.982	691.77	700.479	690.517
	749.02	541.658	613.959	533.484	676.451	576.441	671.429	681.568	680.876	695.286
	799.81	618.969	617.745	526.751	672.387	572.823	679.439	684.591	640.908	687.724
	794.529	510.251	608.057	566.361	684.736	577.514	686.15	678.059	637.039	693.353
	776.804	507.962	597.015	606.606	747.43	584.347	694.842	664.811	650.481	681.371
	777.458	518.952	591.218	495.586	742.166	501.74	700.541	708.661	633.056	671.851
	769.421	543.055	635.048	511.011	747.89	570.879	704.427	710.926	659.876	665.61
	761.916	554.596	645.195	505.179	749.531	562.023	702.686	687.047	638.657	703.957
	740.644	658.897	651.414	674.663	750.076	562.702	701.97	688.787	655.939	700.647
	738.901	479.879	618.211	589.977	752.968	570.046	702.123	688.589	654.103	692.658
	732.439	484.526	591.053	512.047	746.168	563.665	699.948	684.972	628.142	664.735
	735.892	498.783	542.819	505.211	747.462	574.481	700.908	672.252	627.232	659.985
	742.329	485.521	610.687	623.849	752.371	583.153	698.602	672.478	632.479	673.023
	729.616	493.615	546.255	507.136	751.314	579.666	696.082	688.065	647.482	663.938
	739.869	505.185	678.062	469.393	751.297	577.834	695.585	664.887	630.272	655.075
	669.663	575.279	666.906	484.091	764.973	586.596	698.877	656.326	627.259	647.7
	708.247	470.433	671.466	644.547	729.172	575.889	702.646	659.447	676.611	632.061
	689.801	484.237	666.502	746.557	733.448	578.68	702.929	680.939	654.236	625
	750.494	475.755	688.677	722.435	718.317	572.669	701.956	701.533	703.113	624.4
	775.879	487.58	689.794	732.146	729.575	576.952	707.925	694.21	626.311	637.075
	772.814	654.663	689.095	679.998	717.695	575.598	697.095	695.473	594.4	697.276
	743.896	543.752	692.392	675.477	719.233	587.191	700.338	677.414	583.919	645.405
	748.691	438.423	698.282	697.416	739.758	581.642	687.57	696.578	576.893	622.249
	737.869	673.155	687.404	583.036	718.419	606.984	510.805	703.066	602.665	619.727
	734.811	543.098	682.609	527.832	727.953	582.197	524.319	708.83	587.296	626.56
	727.933	461.585	684.348	518.023	744.818	572.496	675.932	721.265	561.573	619.402
	745.081	458.92	691.523	570.867	727.435	578.211	677.127	721.521	580.018	618.557
	745.436	464.269	691.485	602.346	727.176	577.303	585.929	725.007	622.049	634.426
	736.544	456.515	689.416	549.683	727.942	556.873	679.971	719.529	552.445	638.951
	755.058	481.94	695.146	569.23	703.965	537.323	681.451	698.137	520.601	670.718
	739.455	512.06	686.884	601.996	698.553	560.351	632.464	687.285	523.161	652.312
	744.294	509.194	684.842	658.406	684.186	583.79	663.161	675.923	531.915	640.355
	730.003	442.424	694.061	668.013	677.208	597.986	623.943	673.066	530.287	640.558
	731.665	438.751	696.86	716.502	691.706	580.694	598.123	664.11	526.883	631.579
	592.225	491.132	699.966	715.07	692.907	578.262	689.491	664.898	527.726	652.207
	493.893	443.994	698.806	698.87	730.904	596.415	620.389	684.191	586.319	654.656
	560.04	578.041	693.563	679.44	730.862	597.394	615.689	670.311	623.981	640.887
	751.317	658.106	692.103	649.867	719.763	587.493	656.674	663	577.883	631.515
	755.365	661.751	697.89	665.658	696.816	597.976	686.506	686.336	535.266	631.939
	746.834	663.313	701.996	653.595	739.304	589.569	687.314	683.448	556.78	640.746
	746.114	682.958	703.714	659.374	745.794	566.924	691.854	705.664	557.055	677.774
	725.103	654.676	700.888	672.448	739.918	587.335	689.655	717.531	575.871	636.865
	551.695	683.761	691.314	660.8	739.286	580.922	694.408	726.66	565.233	616.712
	732.916	688.729	693.348	664.509	726.971	585.842	687.005	696.864	572.396	646.336
	730.691	700.71	697.808	696.723	727.433	594.179	690.498	679.703	574.193	618.459
	691.707	688.551	684.907	704.626	720.236	577.503	684.442	689.997	613.229	610.749
	688.494	683.348	690.992	731.707	722.634	594.807	685.177	667.686	641.298	639.936
	710.786	705.205	705.838	714.467	721.866	573.654	687.468	644.377	675.065	630.969
	726.062	710.359	706.696	707.376	717.266	594.119	680.244	637.816	633.814	618.816
	627.892	696.971	698.464	702.037	728.139	586.329	680.948	640.536	622.657	621.182
	619.7	696.637	692.629	693.589	742.502	568.603	681.288	638.201	659.605	646.198
	642.676	699.586	685.794	680.216	747.832	574.568	682.909	636.763	614.898	628.966
	622.154	700.375	708.697	680.476	757.669	560.38	678.136	667.525	620.953	647.974
	594.512	711.661	689.994	697.824	740.602	555.668	683.985	624.263	612.37	619.089
	631.371	703.272	709.122	702.215	728.609	570.071	679.955	624.127	613.336	621.715
	619.79	702.503	647.114	668.81	723.826	609.375	685.67	610.305	604.078	637.784
	611.669	700.472	516.901	661.854	727.655	571.284	627.266	607.572	607.619	656.811
	595.804	697.926	654.121	643.667	737.719	570.446	662.519	640.1	593	680.062
	625.921	721.868	669.926	635.762	727.273	598.941	639.958	652.64	702.929	661.662
	686.306	693.663	683.677	645.26	736.836	587.778	619.803	645.23	610.973	664.501
	656.991	703.158	657.084	609.387	741.983	590.112	650.726	645.633	618.097	666.383
	610.792	720.529	686.657	628.055	740.65	595.946	619.809	686.164	622.222	670.916
	578.599	724.889	671.435	671.091	761.474	626.679	611.618	653.009	606.478	660.294
	596.458	719.091	559.226	718.391	750.764	596.167	610.19	646.262	604.534	662.477
	671.723	702.435	667.904	720.848	744.881	578.306	595.42	622.293	618.717	678.392
	653.506	712.414	671.275	668.746	738.063	588.804	599.679	611.72	601.07	667.838
	606.22	713.137	655.145	669.711	723.044	609.293	620.648	685.805	613.325	642.996
	603.273	711.219	474.115	554.895	749.465	649.098	599.684	652.858	609.923	644.024
	602.074	717.612	644.76	551.754	722.746	620.088	586.72	633.163	639.673	651.939
	673.174	696.14	482.836	587.853	715.631	606.745	588.112	623.884	645.445	622.052
	612.617	680.529	597.499	528.863	747.789	657.742	569.023	627.002	641.778	625.19
	587.745	702.43	621.887	664.36	725.562	629.083	548.295	650.433	650.573	625.569
	614.428	650.546	659.582	704.58	740.379	607.749	577.099	617.983	666.667	628.58
	601.974	691.077	638.712	586.789	699.417	609.477	598.037	612.711	700.802	626.752
	663.75	691.132	644.192	484.848	711.28	630.624	610.571	611.859	707.588	623.36
	645.359	676.943	641.796	460.109	751.475	604.412	631.677	623.601	715.612	616.863
	637.566	686.909	653.395	566.566	757.528	603.823	618.428	628.123	718.033	648.071
	628.375	563.526	656.404	519.283	748.104	599.788	589.853	628.035	726.11	629.179
	640.018	508.369	609.605	713.937	749.601	590.015	628.563	675.359	696.178	621.149
	669.925	524.216	650.098	640.808	659.909	583.439	579.344	627.039	640.78	631.07
	663.772	695.474	675.409	592.323	662.456	585.471	570.383	624.581	637.926	628.802
	613.909	524.454	671.669	562.054	656.036	625.449	571.399	616.384	620.092	636.589
	626.737	676.881	668.125	494.539	716.95	618.525	546.513	615.669	639.465	637.494
	606.677	542.03	652.42	511.966	751.283	600.332	591.148	604.132	705.03	671.376
	651.68	717.075	671.124	517.348	759.293	607.134	594.24	643.005	714.726	681.03
	585.508	722.8	661.302	559.426	758.603	627.209	558.631	631.506	688.348	678.468
	566.537	527.611	666.255	604.678	740.061	572.034	543.946	627.75	630.303	683.077
	637.912	557.672	689.613	624.033	758.857	592.995	541.85	637.669	659.541	675.901
	698.897	675.92	687.097	526.093	750.165	594.089	544.327	631.884	649.642	679.857
	677.394	703.076	688.43	549.911	739.669	588.294	534.95	643.474	621.506	653.272
	613.54	709.62	697.302	630	703.444	573.422	543.467	650.498	612.053	680.935
	577.167	683.381	678.31	638.59	694.344	570.115	528.217	687.89	602.007	687.208
	588.749	684.968	688.947	632.918	675.201	622.722	514.52	664.072	632.885	668.239
	614.128	666.134	679.7	683.865	679.987	619.808	573.2	650.144	622.848	659.607
	649.438	685.459	684.457	653.535	724.278	636.445	601.894	633.852	615.591	654.572
	600.122	673.506	681.297	658.975	752.13	623.56	563.709	630.981	663.523	676.627
	701.931	685.107	680.625	650.464	722.855	604.027	532.517	678.548	631.845	665.796
	675.928	684.107	683.009	669.46	674.329	621.253	557.219	642.823	624.706	693.524
	605.374	630.778	681.904	706.926	642.341	607.109	535.77	641.538	631.09	688.971
	568.108	709.557	686.68	673.096	738.212	622.208	543.294	635.646	638.757	711.282
	676.333	676.815	686.448	680.718	752.708	664.484	529.665	636.829	642.235	697.093
	636.205	578.487	673.126	664.946	756.131	679.403	516.162	663.956	636.215	678.673
	653.29	641.246	675.258	654.713	734.494	664.978	543.156	650.149	634.436	676.404
	606.183	628.31	647.789	655.839	673.57	647.169	536.662	647.955	633.932	704.091
	618.026	548.685	612.944	639.189	642.901	614.011	518.103	659.238	647.023	676.657
	620.827	638.568	634.304	618.78	600.705	659.919	576.348	662.494	666.837	659.514
	621.181	623.746	648.259	622.13	599.906	655.099	546.828	687.1	639.851	631.418
	677.583	702.953	613.256	665.338	648.092	627.054	532.144	645.891	631.99	635.826
	673.53	678.111	593.67	583.877	609.137	669.554	546.835	646.683	626.817	669.089
	717.192	685.021	635.6	566.898	594.512	661.38	519.361	629.567	642.522	643.914
	739.708	671.083	582.583	562.039	586.069	657.402	511.597	634.67	723.55	667.89
	691.59	717.118	584.018	522.222	568.634	673.775	551.829	626.241	719.157	686.026
	676.378	721.083	612.864	570.9	575.699	673.777	520.126	640.097	719.486	653.842
	671.057	707.871	590.337	487.119	558.874	671.97	513.624	619.669	733.788	656.121
	683.734	706.806	570.117	491.653	566.502	677.691	542.39	624.122	722.976	634.432
	651.285	704.113	569.438	500.027	613.764	678.519	511.675	657.292	735.173	633.901
	664.424	710.59	561.56	558.311	562.634	694.225	537.721	643.519	732.961	631.929
	694.497	676.591	541.17	555.706	569.123	685.819	545.032	634.474	736.462	636.484
	678.916	708.889	547.692	475.103	559.557	676.776	540.65	673.267	731.707	632.439
	668.994	728.621	555.327	479.829	567.535	675.132	561.764	627.005	729.111	646.017
	679.326	728.459	647.984	580.198	559.894	681.17	613.372	623.168	717.643	656.735
	681.234	718.724	610.733	489.306	562.8	680.46	522.373	666.878	729.818	676.714
	713.775	703.278	567.304	498.278	692.848	686.258	536.228	632.119	729.07	653.213
	718.06	718.968	584.149	492.204	620.024	688.995	568.418	619.506	728.912	636.287
	742.566	722.843	564.72	721.784	558.425	694.862	557.295	619.375	730.085	651.989
	733.037	728.165	573.42	588.462	622.552	687.293	516.05	680.713	726.558	661.514
	759.375	715.609	561.44	497.788	584.355	689.254	520.926	646.394	729.065	647.016
	767.251	715.046	553.904	465.046	561.396	679.257	505.437	634.385	729.266	641.565
	765.904	715.635	537.839	472.393	551.004	684.954	509.163	661.709	730.217	671.967
	765.456	720.326	561.686	478.641	600.616	689.883	554.202	668.696	731.131	457.846
	766.99	725.863	557.924	527.634	574.471	697.966	600.901	649.357	730.056	479.111
	759.411	719.817	547.317	520.495	564.156	686.469	589.892	661.359	729.365	401.846
	762.466	723.937	533.978	531.818	573.908	694.15	508.751	669.168	725.68	356.207
	764.198	720.607	507.503	591.166	609.169	668.834	512.794	601.415	728.481	687.023
	769.481	717.703	552.195	661.813	605.468	682.51	530.455	633.245	715.647	702.803
	757.868	719.85	609.698	670.122	570.847	675.305	541.233	635.321	719.329	711.501
	734.472	717.672	596.292	671.513	572.005	680.352	545.095	615.416	711.59	545.413
	731.979	713.915	558.461	647.969	675.457	683.142	517.633	632.805	721.363	418.915
	750.757	712.496	550.234	661.731	605.3	680.958	514.762	672.868	738.683	709.513
	733.111	717.72	536.563	643.028	622.837	692.903	583.16	721.033	739.12	714.286
	730.746	722.09	538.076	714.899	590.245	691.984	579.769	724.514	715.796	335.196
	734.855	712.397	528.451	698.89	619.249	682.629	523.247	719.409	714.105	406.104
	757.92	711.039	545.896	689.933	607.165	687.009	501.788	718.397	731.073	537.993
	721.315	715.381	503.586	631.709	573.831	694.155	506.098	725.065	721.639	531.935
	711.167	702.056	510.209	601.246	570.348	683.771	533.618	721.154	719.841	713.192
	721.941	720	511.571	617.701	721.861	658.632	544.979	722.46	714.835	717.084
	711.259	728.728	507.697	574.725	635.164	677.172	568.596	726.62	724.124	714.458
	708.285	715.967	510.925	545.485	562.452	687.598	539.339	714.324	725.848	706.611
	690.357	714.754	553.63	606.905	591.387	711.132	553.392	724.332	716.867	711.051
	696.266	737.113	496.722	535.563	655.912	685.288	582.797	728.422	707.338	713.603
	683.015	697.674	499.306	570.98	601.309	676.367	616.677	732.896	711.929	701.58
	723.005	711.097	591.209	548.21	598.419	693.284	645.89	741.511	700.477	665.356
	746.682	559.961	518.337	496.355	601.511	696.239	628.905	735.441	703.793	692.42
	724.042	704.727	566.67	482.424	615.417	692.516	622.942	727.215	703.137	685.345
	712.697	700.57	502.36	495.736	655.649	676.189	549.423	732.041	713.936	696.346
	694.381	716.881	496.637	634.539	710.49	664.716	562.172	740.741	712.346	703.576
	709.083	683.391	505.754	559.72	687.011	656.858	555.527	727.234	701.773	704.217
	696.3	714.768	538.643	509.327	632.511	666.519	540.513	726.486	682.285	708.751
	695.319	708.496	576.094	607.79	614.601	662.963	553.432	730.435	701.21	715.663
	695.418	682.561	590.184	490.702	607.12	655.114	578.934	725.176	716.592	725.212
	746.331	631.579	474.825	478.374	597.109	661.72	524.454	732.951	716.073	722.892
	726.026	600.704	484.946	515.769	659.272	681.471	521.05	733.153	708.799	720.829
	709.042	599.5	476.518	610.53	586.104	669.097	520.424	731.707	694.909	718.073
	697.428	692.722	467.023	515.486	566.641	699.844	506.264	745.723	697.93	714.286
	701.153	679.081	476.578	531.86	647.272	668.796	537.694	741.029	700.216	716.185
	729.628	674.399	516.194	602.573	589.781	699.679	526.208	743.003	708.28	713.006
	686.165	697.311	527.19	480.343	584.574	683.05	553.637	734.201	693.218	714.286
	696.126	707.13	500.738	533.008	587.216	674.442	568.434	722.234	719.38	717.949
	701.542	690.154	488.175	511.872	639.626	684.464	503.376	719.899	716.927	695.485
	699.894	720.218	499.483	489.147	677.208	679.334	484.978	728.133	729.705	678.234
	690.938	706.824	462.709	530.276	708.763	676.377	489.992	732.917	712.454	679.426
	691.519	695.503	653.5	501.864	706.667	480.968	500.674	738.023	693.515	681.925
	733.108	703.903	494.189	526.039	685.043	549.067	535.498	739.255	704.302	662.599
	735.041	703.432	498.404	492.91	673.513	701.867	496.783	733.852	708.421	654.557
	721.169	704.236	543.056	538.069	657.935	692.699	490.006	736.551	710.211	660.12
	716.273	532.335	516.155	582.589	675.256	687.78	514.865	732.104	731.188	656.581
	716.96	703.902	478.063	638.841	667.297	718.917	507.635	743.448	712.764	680.762
	699.753	715.6	510.457	654.613	664.513	701.242	496.763	723.129	725.596	650.779
	717.855	721.488	497.623	719.271	643.171	659.767	522.267	693.09	709.497	644.101
	733.326	722.097	505.729	717.131	637.265	687.265	542.71	691.103	728.745	625.316
	720.038	720.288	479.263	730.275	630.96	707.794	582.593	700.558	686.308	609.583
	708.674	716.53	481.233	731.707	615.215	695.623	607.064	731.133	702.231	611.925
	709.791	717.534	495.607	733.244	675.226	687.95	658.162	738.514	674.263	605.474
	675.962	532.581	490.867	731.632	670.713	683.253	670.953	728.522	692.556	640.165
	667.105	712.01	494.624	734.295	619.469	677.766	678.519	727.575	682.415	684.88
	665.423	690.554	475.411	736.719	733.739	683.131	676.846	736.764	705.471	634.71
	678.137	703.155	519.821	722.892	724.138	681.31	683.799	731.594	700.427	646.825
	668.618	717.608	489.422	721.052	666.428	688.999	686.356	735.552	727.157	639.491
	659.164	711.382	483.003	717.417	636.849	669.434	690.916	555.332	721.443	646.009
	668.886	711.979	482.59	728.937	726.868	687.58	688.856	717.043	715.593	622.791
	705.013	664.241	539.454	699.221	735.901	691.121	692.24	735.751	706.575	640.967
	698.728	685.753	639.473	710.864	730.358	684.464	686.947	719.939	714.13	652.241
	689.027	636.662	588.296	738.391	742.219	692.033	688.666	733.061	711.067	648.369
	684.975	642.457	449.62	734.39	735.492	688.998	687.398	733.231	720.297	622.159
	724.434	679.904	440.287	721.517	744.811	685.458	696.027	737.04	716.885	648.567
	736.957	657.358	440.561	732.601	745.608	687.999	694.243	741.327	718.563	633.056
	680.787	654.489	456.287	740.741	737.475	680.391	693.277	740.282	719.119	628.81
	751.489	641.86	512.95	738.544	742.043	675.885	694.703	757.389	725.779	653.951
	764.117	640.897	490.156	735.423	703.099	655.483	697.086	739.22	726.965	653.301
	763.672	644.803	504.176	726.607	697.246	664.586	695.489	728.202	709.153	665.066
	764.382	636.524	503.615	726.797	679.429	673.871	693.66	738.969	717.519	671.376
	758.786	628.601	555.615	739.359	712.65	667.107	691.352	726.887	725.267	668.584
	757.885	634.66	664.22	731.013	699.644	656.958	692.417	728.937	719.144	657.75
	765.53	645.031	572.502	741.334	726.5	653.142	695.274	718.679	731.707	661.729
	764.638	634.505	496.644	738.986	755.017	664.381	693.56	722.04	733.713	671.928
	766.969	627.328	524.337	724.391	750.705	644.085	693.898	714.871	730.502	683.436
	778.401	664.633	492.387	720.691	735.194	665.645	687.477	701.431	718.034	684.895
	781.212	629.261	578.336	733.013	746.393	668.733	688.72	704.65	706.657	665.721
	779.279	608.424	499.424	742.622	744.291	676.021	687.071	713.615	702.988	673.018
	768.608	556.731	492.09	738.12	745.234	689.344	706.994	716.281	720.329	668.677
	766.164	562.099	480	736.593	739.935	599.576	706.498	704.985	727.694	657.244
	759.692	535.77	493.765	735.368	745.407	632.285	710.616	726.984	709.27	644.963
	765.158	528.689	490.686	743.529	742.696	661.596	706.66	726.952	729.127	673.294
	573.654	524.36	489.362	745.717	735.187	668.701	680.925	716.874	718.711	656.971
	755.556	509.238	503.943	744.568	746.653	679.49	694.295	710.702	726.284	669.664
	759.494	513.388	542.38	747.849	743.498	664.111	698.627	709.065	732.706	687.67
	749.635	518.156	488.347	747.843	743.283	641.08	696.81	709.228	748.018	678.763
	745.038	521.131	555.394	750	738.429	662.88	690.678	729.211	733.119	660.043
	737.629	501.037	642.996	746.966	739.921	650	687.388	698.392	714.522	648.765
	730.303	526.608	637.958	751.364	741.912	674.054	673.799	726.982	713.987	677.106
	733.63	592.724	606.97	744.611	753.58	663.242	509.554	697.894	721.551	702.04
	746.861	515.021	605.841	730.631	727.112	670.106	528.947	698.288	722.634	680.518
	719.25	571.861	614.066	737.638	748.09	667.69	508.59	697.966	721.894	660.639
	699.574	547.411	663.231	745.047	738.225	671.197	450.93	716.989	720.789	642.814
	713.499	574.902	580.296	750.814	732.966	681.7	567.754	699.911	725.162	651.725
	694.743	562.147	642.797	758.57	739.528	674.694	692.978	722.928	726.928	676.646
	687.282	500.287	677.635	752.146	724.39	683.085	537.746	725.655	721.671	673.815
	668.852	535.016	676.503	756.161	731.552	675.295	675.717	727.041	733.686	658.074
	655.521	600.575	685.339	750.203	739.624	681.427	683.215	739.284	728.943	675.327
	725.51	627.503	677.947	757.156	738.613	687.319	684.374	710.182	742.261	681.818
	665.708	626.793	653.595	755.905	776.169	686.023	685.999	705.513	738.622	668.3
	635.378	510.431	604.108	756.565	779.221	688.605	698.799	697.238	737.572	667.962
	662.699	531	614.003	751.026	771.537	683.445	703.339	689.801	735.227	667.495
	640.348	553.797	537.776	736.996	740.992	689.263	704.441	696.349	710.677	675.476
	664.887	575.031	580.596	744.352	744.52	677.761	696.421	679.075	722.074	701.894
	660.338	611.465	545.207	742.055	756.667	692.168	692.886	691.045	697.318	696.96
	709.748	631.763	527.064	739.174	752.584	686.909	697.113	692.445	693.931	673.062
	757.241	629.287	509.194	757.109	710.23	690.877	699.548	683.178	683.308	671.849
	740.562	628.175	533.657	755.94	739.836	694.5	699.721	672.436	680.23	715.766
	724.983	633.717	559.412	748.887	744.18	694.021	700.552	703.554	710.585	717.536
	684.777	626.189	499.591	747.747	733.488	688.232	695.784	693.191	653.352	687.011
	659.817	618.7	491.936	750.083	741.954	695.233	690.948	662.371	649.173	681.99
	623.833	648.918	518.339	728.011	752.977	706.069	678.282	727.824	655.008	630.419
	638.684	586.919	541.684	726.332	747.463	700.094	677.551	729.707	641.99	629.954
	645.748	523.49	596.72	737.178	746.512	703.704	685.162	713.084	635.356	640.494
	706.676	507.148	536.743	725.415	724.479	701.187	686.606	722.575	666.439	633.407
	638.493	510.501	545.923	716.448	753.287	703.647	705.078	723.342	655.919	650.198
	662.332	518.555	538.13	747.886	758.479	704.553	695.962	717.469	641.046	630.617
	624.842	503.158	549.512	745.342	756.137	708.039	691.267	722.118	654.215	622.148
	663.357	530.596	572.092	754.433	737.074	711.477	705.882	725.105	687.317	631.065
	635.721	503.753	542.753	756.857	756.895	706.378	708.273	729.753	649.786	635.367
	698.881	493.739	529.995	756.076	734.97	707.368	705.882	724.369	646.286	645.026
	684.848	498.743	534.905	750	735.177	703.567	703.615	722.465	624.968	663.135
	659.64	532.409	562.281	749.47	765.461	701.868	695.813	730.194	624.591	631.681
	643.855	518.286	558.418	722.929	749.956	702.031	696.729	742.376	607.021	635.115
	638.69	505.584	594.246	732.868	747.888	697.119	685.416	734.28	603	639.814
	637.007	535.741	578.244	742.838	761.206	695.23	667.688	725.865	638.362	673.913
	674.157	523.71	577.609	739.14	754.205	712.442	668.002	733.825	595.294	641.679
	686.2	584.085	581.431	741.135	750.661	707.051	644.947	731.006	590.769	620.838
	720.148	571.818	640.297	737.601	757.775	710.019	683.578	722.767	603.167	618.292
	690.913	555.674	587.507	733.858	750	712.878	698.43	718.099	646.637	612.867
	690.839	578.95	534.062	716.839	754.632	715.915	682.108	719.217	609.825	635.684
	646.794	584.953	593.969	743.909	758.063	717.621	688.549	724.444	597.893	613.294
	694.305	615.11	559.783	741.511	748.749	711.934	703.912	731.707	605.449	586.601
	641.873	609.927	537.341	728.386	757.989	717.147	702.528	726.817	613.882	671.019
	652.24	609.21	521.949	746.058	723.83	724.095	685.64	737.848	662.626	656.27
	700.318	613.422	542.424	748.855	704.548	715.393	656.224	727.572	623.518	640.743
	656.868	612.709	555.611	748.186	737.4	722.892	676.178	740.699	613.121	658.44
	656.341	600.91	570.669	753.527	724.697	721.464	671.184	737.956	609.528	668.016
	652.605	596.071	540.924	737.197	707.993	722.892	657.367	747.012	652.378	654.186
	662.03	600.801	555.527	751.275	705.453	724.24	646.083	739.91	610.552	655.453
	655.273	649.459	545.845	736.141	691.113	724.352	669.471	734.797	600.613	686.999
	671.303	650.64	545.317	735.194	699.149	728.653	632.911	739.073	625.163	670.931
	659.64	534.025	568.304	731.631	738.845	721.698	671.566	735.667	620.061	654.19
	683.56	539.436	556.5	756.936	694.395	713.601	696.591	739.764	618.591	681.32
	682.409	568.825	615.185	723.968	698.244	708.224	709.815	728.461	663.813	712.549
	646.806	504.38	592.284	713.22	685.801	680.708	697.813	722.25	634.548	718.13
	644.504	492.701	575.242	654.557	656.912	702.316	703.212	726.976	617.139	719.771
	695.364	496.093	578	744.628	652.439	691.84	688.992	737.476	615.872	714.286
	680.61	492.678	585.567	746.253	679.679	704.804	668.543	730.599	663.486	711.598
	677.915	555.879	602.755	746.687	656.295	715.849	652.61	714.808	625.308	714.174
	694.733	695.814	601.685	747.742	688.885	715.693	650.617	712.346	628.272	714.286
	707.556	670.409	600.371	719.329	692.941	713.593	662.926	734.776	618.295	708.242
	682.359	686.514	590.817	728.33	705.298	717.493	677.656	724.602	618.332	705.227
	679.612	702.176	587.879	708.009	653.508	722.929	655.014	717.446	615.602	712.106
	679.93	681.27	592.229	728.831	625.985	722.892	600.422	740.884	608.868	706.427
	665.249	695.827	583.787	700.637	623.688	704.329	667.055	743.632	599.939	714.172
	677.398	716.225	586.548	710.292	603.781	697.498	565.092	740.549	594.573	710.804
	669.426	711.548	636.357	689.48	708.402	685.83	580.382	741.646	607.744	713.966
	704.56	705.804	639.148	670.476	639.491	687.419	580.153	732.41	605.205	723.946
	719.683	710.777	633.576	601.534	633.814	690.739	613.484	732.382	634.83	734.611
	727.706	709.259	621.683	585.791	697.28	691.852	613.892	732.936	631.143	726.223
	662.95	716.361	593.393	613.803	624.777	685.315	554.073	733.914	629.147	723.734
	703.596	712.022	586.287	590.949	588.911	717.785	539.057	735.053	641.711	723.469
	749.698	710.522	616.531	600.755	625.327	698.453	610.077	717.302	684.039	722.892
	750	708.502	588.361	566.364	588.147	693.484	596.924	709.242	661.367	726.129
	751.179	713.171	531.731	606.373	593.264	679.932	618.926	691.461	632.274	711.717
	747.9	715.795	530.142	609.8	588.053	674.157	578.211	684.918	639.265	706.843
	750.667	718.847	516.136	605.058	582.287	662.573	653.529	686.564	620.788	717.097
	757.844	711.346	504.151	605.304	605.782	675.833	591.208	705.188	623.668	698.483
	770.806	717.559	491.182	615.831	625.731	680.272	548.097	685.488	601.084	707.789
	764.127	719.599	498.379	655.293	577.874	683.274	551.32	686.118	601.613	711.332
	763.663	711.318	500.531	703.03	581.026	669.264	564.777	670.48	603.672	711.405
	760.938	711.27	525.238	624.778	584.516	672.16	599.906	702.135	594.059	382.775
	754.808	711.61	605.88	632.535	571.576	670.254	631.125	681.128	583.444	714.097
	738.155	711.27	495.893	567.719	578.966	669.393	541.604	653.871	604.494	703.5
	712.929	709.58	510.912	555.617	640.923	683.462	556.558	653.098	590.799	701.846
	712.946	706.84	532.481	574.225	636.087	686.424	525.722	696.842	624.899	677.429
	698.805	709.062	522.396	566.889	645.326	684.836	532.07	678.408	594.15	656.741
	697.639	716.528	541.711	544.196	661.559	667.307	540.114	672.155	595.51	649.678
	687.725	706.883	551.4	555.099	642.104	657.61	533.645	651.94	598.534	638.266
	711.964	717.941	562.975	535.497	687.572	651.931	519.625	666.564	604.693	678.907
	718.037	719.352	618.16	523.584	663.234	645.297	526.893	657.642	598.73	717.568
	709.184	726.836	524.852	512.153	680.927	645.784	527.513	651.575	608.227	712.857
	693.029	595.773	503.586	532.235	642.747	641.466	523.327	638.89	636.899	675.894
	699.047	705.816	479.17	520.339	699.172	639.685	532.909	625.964	637.287	653.522
	712.697	576.419	505.448	507.374	598.981	653.753	564.002	691.363	637.372	637.007
	734.346	705.706	504.252	530.041	651.746	659.24	526.343	663.662	663.878	633.085
	697.569	726.111	577.17	608.255	618.712	633.621	521.632	663.512	654.11	641.161
	704.152	718.785	576.923	651.595	617.153	627.937	524.709	646.646	647.863	632.832
	748.299	564.204	594.993	661.073	612.88	606.838	528.795	643.076	628.96	641.516
	710.438	703.496	553.415	657.045	585.144	601.296	538.803	655.79	644.111	671.642
	682.912	506.477	568.821	679.131	607.735	605.06	538.6	644.256	609.263	638.168
	763.733	587.737	582.972	645.194	579.899	600.965	530.108	640.818	630.659	630.83
	767.168	655.974	522.082	630.018	569.483	608.599	526.661	634.423	610.073	615.4
	760.656	665.677	494.472	614.929	549.276	601.428	528.227	630.027	590.722	637.32
	725.211	680.581	573.041	570.101	556.866	600.305	527.964	643.284	592.489	671.275
	652.636	692.641	581.84	589.198	558.315	605.516	533.688	685.552	607.52	694.836
	709.751	591.028	576.379	578.658	605.602	618.687	518.794	659.24	616.718	659.873
	627.178	547.112	575.05	576.538	550.148	583.338	535.307	664.056	576.4	665.105
	649.436	682.782	590.104	585.795	554.272	611.091	520.36	658.029	611.183	651.416
	635.028	704.195	638.916	595.232	571.573	605.967	483.057	654.433	602.321	646.325
	631.452	568.484	639.597	592.984	576.597	632.716	529.224	644.488	600.985	644.99
	632.071	697.559	617.87	610.42	571.546	612.214	527.85	660.951	621.311	663.002
	695.051	702.49	547.748	623.546	594.741	629.989	623.72	641.033	605.772	648.993
	639.394	550.878	613.009	600.582	562.869	593.348	625.158	667.036	605.052	655.406
	624.302	544.51	522.909	596.518	599.207	610.438	623.667	682.657	605.169	655.148
	652.141	712.072	481.167	622.127	576.186	600.836	546.199	683.083	605.154	655.431
	692.331	574.807	473.329	595.86	588.965	608.82	530.973	659.374	593.447	676.56
	637.055	571.759	545.122	575.316	587.035	601.343	519.216	653.468	622.585	670.66
	639.232	714.286	474.958	575.312	581.517	599.193	545.332	643.366	624.666	671.069
	595.954	548.41	467.994	620.905	575.326	592.855	524.287	688.744	610.345	663.463
	604.202	684.105	551.209	603.13	594.239	603.786	515.416	664.653	607.362	660.642
	599.002	646.93	513.957	576.529	710.04	619.943	516.372	646.654	610.338	653.297
	620.211	658.714	452.388	589.435	642.458	608.715	513.418	651.904	655.381	664.005
	652.539	677.13	453.312	587.453	729.558	584.553	515.978	644.246	568.336	643.301
	652.699	697.492	447.966	630.641	731.906	576.427	514.383	641.842	538.589	651.83
	672.513	681.339	441.893	569.19	707.06	572.12	513.899	690.896	549.572	629.116
	668.834	662.065	457.312	566.129	705.188	572.178	514.453	675.977	530.437	622.043
	729.474	662.432	500.455	522.426	682.307	572.356	510.139	656.934	529.174	652.537
	696.92	659.953	570.141	506.767	709.727	579.593	513.402	664.408	536.228	655.49
	708.901	650.923	492.401	505.276	694.571	585.239	503.763	671.676	510.587	694.779
	740.881	651.668	594.695	551.239	685.125	583.988	504.456	656.85	498.649	677.688
	732.54	673.195	516.403	591.178	670.391	578.35	541.665	654.258	498.507	653.725
	716.589	675.156	475.561	610.887	673.062	593.939	557.351	649.497	495.919	675.447
	710.261	658.836	478.204	638.007	657.443	588.622	528.552	638.399	504.304	708.341
	735.457	657.224	647.256	640.04	657.974	579.448	526.85	644.769	553.619	716.82
	689.978	646.195	637.047	652.636	676.633	605.446	535.189	654.464	518.758	706.982
	626.394	650.794	615.385	640.952	673.85	584.226	526.925	654.579	517.924	666.058
	635.754	639.814	589.279	696.985	683.026	569.438	589.616	635.164	537.25	642.534
	616.009	654.466	657.147	635.337	708.286	564.158	535.083	647.981	601.487	611.221
	722.552	668.201	668.18	600.56	713.046	551.627	525.913	677.549	618.399	585.277
	693.134	694.1	494.722	618.203	695.111	542.479	526.505	675.084	617.135	597.47
	686.907	669.393	678.27	608.044	713.563	541.529	525.866	665.706	533.603	577.654
	698.868	669.701	674.982	577.752	743.471	560.875	521.652	654.392	516.168	559.101
	685.217	662.515	666.15	710.681	707.812	566.217	542.159	675.714	515.742	611.683
	675.164	647.603	683.334	625.608	693.519	535.909	513.925	695.051	537.341	665.893
	678.45	639.652	687.777	510.336	672.32	552.883	502.631	648.221	535.288	583.503
	700.64	647.629	692.223	490.437	664.582	540.164	508.816	623.408	531.954	574.504
	728.306	657.742	681.86	492.209	647.341	560.946	499.114	629.841	532.952	550.403
	698.77	670.338	676.646	499.788	653.222	569.514	512.766	656.148	608.544	567.594
	716.063	641.402	681.058	524.364	660.436	570.853	507.077	642.026	552.032	613.027
	692.75	656.594	688.638	542.226	655.517	559.485	499.589	646.663	557.443	597
	678.608	625.941	688.329	497.925	646.999	598.427	500.208	628.468	573.858	571.487
	704.767	610.532	693.578	525.383	638.853	556.396	522.018	668.862	597.109	614.053
	692.518	621.325	695.077	494.739	666.429	528.42	520.594	655.853	644.903	567.188
	679.032	641.777	697.253	547.066	633.322	521.502	522.51	656.768	623.795	588.92
	665.927	646.083	698.529	528.33	687.555	525.916	527.399	651.028	672.89	682.372
	690.052	645.455	699.229	511.179	667.483	526.397	507.166	646.982	694.741	729.56
	719.703	644.344	702.178	517.241	644.965	538.912	514.649	652.573	699.426	733.581
	647.667	585.141	703.465	537.159	640.764	609.36	592.867	657.976	707.471	724.914
	670.089	631.645	700.974	623.654	737.795	542.322	532.265	645.631	680.364	730.503
	657.642	673.933	702.482	589.454	710.474	576.449	505.136	635.995	639.932	726.26
	655.688	647.187	705.616	579.859	715.874	578.62	501.105	633.217	609.539	729.018
	646.374	631.772	705.438	563.246	684.376	573.62	495.07	638.264	615.687	729.654
	651.773	637.168	702.648	582.615	722.934	585.413	495.995	628.081	605.471	717.565
	647.023	631.865	700.301	543.148	748.7	590.742	492.935	651.353	589.136	725.752
	683.804	618.052	696.005	558.502	734.28	594.33	490.625	649.819	579.93	735.859
	639.329	603.197	700.701	535.949	751.849	579.022	479.042	632.004	590.443	723.164
	640.269	607.572	701.439	563.545	725.066	574.608	503.994	645.755	590.501	730.862
	654.737	632.677	696.486	633.723	742.794	631.643	484.362	638.433	644.673	718.839
	672.945	622.281	699.581	661.697	748.252	593.819	477.223	682.406	608.165	695.354
	661.663	639.514	702.123	711.51	755.912	590.174	474.723	668.795	601.955	718.444
	642.235	594.636	696.938	698.487	746.452	602.366	470.085	664.973	618.812	714.91
	659.673	592.658	701.844	659.065	745.121	595.244	531.834	648.534	636.368	709.22
	719.204	591.571	708.139	630.303	752.594	604.412	482.549	653.776	628.202	713.112
	703.736	572.647	698.906	620.797	752.117	604.496	466.46	671.351	626.777	708.808
	717.949	550.897	697.222	652.605	759.669	605.083	477.989	714.286	614.281	729.373
	700.167	576.485	706.88	627.733	762.182	609.028	474.483	669.934	632.193	740.233
	702.669	602.484	704.615	629.264	730.897	604.658	521.242	644.786	636.978	733.237
	715.322	562.002	704.346	625.954	726.996	611.242	575.315	620.479	634.706	727.754
	676.09	577.162	708.676	665.23	721.768	609.848	521.975	599.078	637.305	738.572
	684.848	538.858	721.046	685.386	698.668	608.149	472.265	600.828	616.927	736.241
	683.985	631.546	731.517	704.117	671.63	607.618	474.033	633.521	620.56	713.571
	668.736	569.007	725.288	712.005	650.839	608.182	489.013	563.19	622.521	701.399
	694.465	566.038	727.727	688.525	674.43	622.046	501.515	566.944	653.615	714.286
	628.724	647.306	719.381	700.743	624.285	609.214	482.151	565.448	656.064	712.589
	618.232	551.57	721.036	655.791	668.268	597.897	523.819	585.336	648.402	700.137
	638.491	504.387	718.94	654.05	630.323	650.651	504.411	577.368	693.821	732.836
	637.716	528.717	725.699	654.037	630.696	621.324	497.938	549.652	703.566	723.267
	624.403	551.127	721.284	639.744	613.107	607.97	492.866	543.536	704.622	727.695
	626.815	575.436	710.673	642.425	640.875	571.026	502.484	558.55	710.946	704.166
	625.899	552.309	686.22	676.787	619.71	576.655	518.484	618.305	696.408	698.384
	585.002	557.961	711.034	685.056	593.484	581.047	471.81	556.529	714.286	715.236
	587.785	597.878	722.593	678.796	589.278	587.605	465.567	540.149	713.415	705.882
	584.752	584.199	602.031	721.512	627.558	592.661	467.975	658.147	699.088	717.703
	605.755	599.304	742.772	710.185	580.566	590.372	457.41	719.666	702.113	708.236
	653.629	637.906	748.155	675.826	583.562	593.066	448.938	722.892	706.422	716.778
	679.93	617.527	594.094	689.69	683.309	580.499	461.118	719.987	726.459	724.38
	636.975	587.552	719.353	669.439	615.985	590.551	514.068	718	726.948	745.553
	640.032	586.728	720.21	694.36	667.282	591.447	449.793	724.86	725.794	733.912
	612.02	591.789	693.327	644.575	657.941	572.519	449.12	719.987	722.222	719.655
	616.927	607.287	660.406	600.831	620.94	572.347	443.522	724.446	722.156	718.844
	656.946	607.829	519.914	605.873	622.304	554.69	443.629	719.292	722.892	741.034
	698.83	646.819	684.251	627.642	639.344	562.139	445.054	728.451	717.977	735.361
	654.81	599.184	700.969	591.369	663.034	583.587	469.626	722.422	720.064	746.699
	625.065	567.429	672.316	585.847	717.798	570.923	495.065	725.76	716.428	723.044
	640.668	561.502	657.987	649.217	681.247	547.651	437.282	718.319	682.268	724.346
	635.497	567.773	657.62	662.005	667.152	549.784	450.628	692.503	651.908	696.005
	593.688	601.946	683.133	636.096	671.423	552.656	485.01	657.873	639.245	709.203
	649.211	629.633	668.016	603.145	668.765	533.808	481.162	641.092	657.909	729.296
	631.547	626.861	685.314	602.317	668.549	541.091	438.49	629.434	628.574	729.919
	610.647	617.725	679.009	639.966	692.54	542.068	528.908	646.422	609.668	741.217
	600.607	633.814	701.452	680.206	671.492	548.867	508.903	656.548	603.758	740.948
	644.578	614.988	695.7	679.798	680.286	535.537	456.135	651.663	611.273	737.236
	623.955	606.776	669.364	687.176	659.274	551.017	446.984	653.978	670.31	730.148
	646.512	597.845	685.901	679.153	657.124	563.665	439.705	640.174	626.887	721.41
	658.292	647.518	697.348	670.239	680.548	575.031	466.108	718.354	654.813	705.396
	695.058	636.299	699.651	672.005	684.991	551.045	451.403	711.782	606.727	707.387
	684.532	631.162	692.923	674.361	684.714	551.555	445.05	670.271	622.445	708.46
	675.471	612.834	690.873	673.85	673.107	539.018	466.203	679.165	666.223	716.99
	684.283	614.176	697.511	675.954	656.088	542.045	449.915	653.219	611.881	704.75
	721.769	609.429	700.633	725.056	715.487	558.337	444.288	644.525	600.319	725.324
	722.624	589.373	677.841	719.254	699.762	558.947	456.066	661.417	595.613	732.531
	710.493	653.128	673.308	721.216	716.771	549.609	496.699	602.038	624.668	736.105
	717.202	601.894	671.345	700.46	720.412	551.766	455.696	604.596	624.436	732.778
	735.527	509.633	675.777	700.753	695.978	541.622	457.689	600.182	683.501	731.386
	742.297	512.739	680.315	697.561	717.98	578.087	489.057	604.344	659.475	722.266
	745.451	554.938	685.351	658.525	723.37	547.742	525.969	635.036	626.446	730.419
	742.37	615.402	681.204	691.003	709.343	541.451	495.471	665.447	617.171	563.519
	741.635	540.735	687.968	655.986	706.176	544.355	612.983	637.2	626.526	556.356
	572.092	525.543	685.94	647.994	694.204	548.263	609.795	649.225	598.815	543.89
	737.563	491.145	560.245	627.285	719.308	527.193	630.152	619.478	619.61	707.535
	730.703	642.471	684.325	660.073	708.161	571.256	641.209	700.867	631.014	514.119
	738.584	617.682	699.757	636.009	700.106	565.665	643.314	729.888	631.796	587.502
	735.167	539.284	693.359	589.58	704.827	543.777	640	733.518	669.95	709.477
	748.365	652.897	656.276	565.267	696.786	584.919	649.127	729.683	701.389	706.137
	745.958	494.463	666.916	606.222	702.078	573.845	650.229	729.576	717.898	695.785
	747.664	469.887	647.806	533.024	732.56	550.152	658.853	728.243	719.037	700.011
	747.04	465.749	650.449	686.643	710.936	548.564	656.388	724.638	721.297	697.749
	748.799	465.14	641.762	677.265	715.585	550.57	655.465	721.242	722.393	689.867
	745.602	457.784	682.744	686.193	697.008	534.62	657.673	734.346	729.66	695.79
	746.872	499.672	680.523	698.308	692.448	543.998	664.436	735.766	725.522	690.485
	746.06	564.698	687.249	678.054	706.332	533.289	670.816	734.417	729.006	717.857
	753.138	566.097	695.643	604.127	703.893	524.958	667.214	733.831	729.311	733.086
	749.373	652.098	702.663	558.428	704.182	531.274	659.051	720.896	719.603	729.398
	750.658	632.634	703.262	591.722	651.067	545.179	669.443	733.406	724.365	725.74
	754.386	595.18	690.068	549.623	613.763	535.131	679.805	729.128	719.949	705.546
	753.284	505.283	685.558	570.869	633.31	548.377	539.782	722.371	720.167	690.955
	754.501	579.842	685.714	540.541	629.197	560.464	665.449	722.892	708.224	709.681
	762.581	509.327	682.622	603.317	658.312	564.577	638.817	715.893	708.686	695.978
	773.303	519.941	683.514	533.362	655.636	536.977	661.508	721.74	697.895	680.193
	783.324	593.171	680.917	600.546	673.632	551.442	666.414	716.858	707.884	707.044
	775.638	661.741	670.1	530.917	636.596	555.703	664.87	715.573	708.281	675.197
	774.454	612.494	638.645	563.557	643.219	543.247	678.686	713.901	695.536	699.214
	777.322	584.72	634.73	594.83	643.732	573.678	668.056	719.111	701.574	730.673
	771.114	600.264	622.281	603.48	681.666	554.517	655.416	711.796	711.221	727.464
	772.762	646.228	625.572	619.227	654.5	510.225	665.849	722.267	714.982	730.06
	759.202	648.19	665.583	553.608	672.577	542.369	656.437	719.626	699.375	712.45
	761.905	643.859	680.751	611.268	640.234	530.303	644.896	720.919	712.306	699.364
	758.628	642.359	678.935	642.66	635.405	531.544	662.586	721.298	695.503	735.303
	747.123	637.462	677.346	677.602	655.255	533.291	659.096	718.857	704.474	729.756
	742.762	638.909	670.46	707.692	642.273	527.486	664.524	718.915	707.617	717.979
	740.188	655.323	670.141	656.394	620.7	521.133	652.66	721.565	715.431	676.578
	739.244	634.017	622.188	626.464	614.729	531.915	664.885	745.639	711.9	671.01
	743.494	645.422	578.563	603.526	618.18	544.218	661.345	736.866	710.526	672.146
	744.903	605.079	597.659	572.278	641.875	561.286	669.621	747.231	708.61	670.496
	743.481	574.132	592.934	554.102	658.917	585.783	682.647	750	711.646	684.987
	743.046	601.388	578.175	569.844	662.286	585.588	677.882	746.482	693.914	677.932
	741.631	570.137	579.97	553.068	663.724	570.158	551.234	743.559	694.127	700.78
	742.896	535.168	559.627	540.913	698.557	567.559	680.983	740.788	704.107	678.899
	726.237	534.371	551.348	523.81	688.4	589.198	677.218	744.181	702.994	671.022
	747.015	568.497	547.501	615.846	643.547	537.127	691.846	720.544	706.041	669.325
	746.797	589.779	533.657	558.647	628.995	561.315	698.366	733.513	710.681	643.074
	744.528	673.811	561.4	542.159	620.817	557.488	694.925	735.18	712.109	650.249
	743.077	496.995	540.624	661.93	588.566	570.504	690.72	731.517	703.581	627.411
	745.367	448.125	538.403	678.964	602.434	553.775	686.99	744.005	712.27	635.113
	739.211	462.795	524.454	683.007	581.877	562.33	681.026	743.456	718.417	677.674
	742.938	548.291	518.873	683.077	592.915	556.73	680.218	744.196	711.87	659.84
	734.631	489.697	525.86	658.507	589.043	574.163	632.656	740.741	713.874	724.973
	734.552	468.37	622.977	679.553	564.292	568.908	618.083	740.015	713.381
	741.088	470.359	580.635	684.987	575.467	525.916	615.742	730.599	711.924
	744.282	556.061	518.108	686.582	585.275	538.485	597.431	737.507	713.424
	745.677	678.123	539.078	696.242	537.59	546.943	586.181	720.026	722.736
	739.051	687.656	548.873	654.59	558.256	564.282	585.617	712.567	728.491
	743.917	664.718	585.872	637.763	610.86	519.178	570.093	705.161	719.258
	739.882	625.681	540.568	600.529	623.266	550.861	605.281	702.219	743.633
	736.988	615.369	522.936	580.55	688.531	524.587	567.641	696.794	740.741
	744.196	638.073	521.394	643.137	613.415	605.331	561.034	701.551	737.124
	742.092	660.087	512.794	734.249	565.002	567.512	574.018	685.388	740.135
	736.784	605.42	515.235	743.884	723.634	555.134	594.54	673.151	730.734
	739.103	596.102	505.211	745.299	731.188	554.18	557.587	672.757	724.697
	726.946	588.17	501.375	743.034	728.569	580.478	580.964	705.308	738.968
	742.157	591.133	500.051	741.078	702.356	589.478	554.568	700.35	725.624
	736.526	634.721	494.739	728.008	653.307	611.782	550.599	695.54	730.209
	723.395	649.896	488.22	745.223	642.085	586.478	540.037	698.512	733.854
	721.602	635.847	580.943	748.555	656.622	576.688	543.715	680.167	732.437
	734.057	612.728	486.536	749.581	630.834	572.147	525.779	711.751	726.091
	726.644	631.48	477.125	747.483	634.236	578.005	530.517	702.832	712.442
	716.455	640.516	474.396	751.934	663.703	558.453	518.082	687.809	731.827
	719.867	663.724	480	751.856	632.091	553.222	518.003	673.501	737.075
	706.926	636.825	486.087	751.904	642.736	550.71	526.965	679.422	731.59
	697.463	645.096	486.162	757.261	647.284	553.398	572.157	668.218	740.088
	717.312	679.085	492.276	764.977	658.946	547.58	501.876	673.682	730.319
	720.339	652.907	474.862	776.221	624.613	535.066	500.556	668.975	710.491
	713.458	679.052	475.261	772.86	630.696	533.466	489.436	669.18	691.954
	698.73	646.096	482.659	779.221	612.077	580.148	477.445	659.873	705.462
	716.538	651.94	476.386	766.855	567.273	508.63	480.774	656.652	690.456
	699.011	646.125	474.892	754.216	571.671	509.95	552.644	660.711	694.395
	701.211	654.004	464.045	731.038	648.023	518.431	482.088	660.712	666.12
	729.666	638.491	530.782	705.149	621.97	535.009	454.916	654.056	648.565
	738.835	630.877	536.237	735.126	562.642	570.129	450.738	693.623	666.454
	721.342	621.105	473.572	724.289	592.94	566.355	467.049	693.232	429.338
	681.543	622.116	467.306	723.489	607.819	578.517	457.784	700.779	671.065
	692.203	622.063	520.896	751.122	588.838	585.706	458.178	689.377	681.15
	676.772	616.221	478.479	731.941	610.695	594.265	451.971	683.307	669.908
	678.856	612.771	483.846	750.08	669.832	575.015	450.628	677.146	664.998
	654.578	607.318	477.638	744.287	604.692	571.515	455.419	685.231	647.572
	669.409	646.934	492.676	748.945	602.302	552.799	473.138	684.657	668.448
	642.672	675.59	479.854	751.815	598.894	555.82	492.621	661.98	666.023
	654.061	680.234	478.458	748.262	659.274	553.623	467.068	686.291	678.59
	716.4	670.279	517.11	747.174	673.057	564.634	508.244	676.873	698.962
	643.878	662.558	477.732	735.552	628.77	579.654	473.968	683.342	708.425
	632.219	688.421	477.488	743.518	630.565	216.802	524.682	671.932	692.8
	652.34	532.238	474.069	756.316	616.854	530.299	524.031	659.609	685.216
	681.747	697.674	514.943	747.01	641.159	526.452	458.136	676.73	702.07
	630.355	699.708	474.114	755.068	629.53	520.135	447.352	678.8	711.476
	614.438	699.955	513.188	731.514	653.876	504.483	442.156	670.636	700.651
	626.552	698.594	512.717	725.195	728.945	517.215	439.392	671.882	700.503
	657.292	706.006	481.103	731.145	710.137	521.95	445.37	657.594	709.356
	655.756	700.801	473.428	748.924	731.821	526.127	431.394	654.326	717.911
	655.828	708.845	481.186	734.892	736.518	567.89	430.412	680.619	705.923
	659.52	706.565	566.521	729.119	735.201	539.161	436.285	674.74	718.74
	689.514	708.9	458.595	732.086	743.844	528.578	435.382	679.474	712.941
	695.485	703.318	472.133	750.041	734.486	541.74	439.915	662.523	716.69
	687.522	707.886	468.18	734.984	738.297	550.572	442.315	653.761	693.768
	653.76	706.002	467.517	761.862	743.198	539.289	443.45	637.324	675.497
	690.073	709.795	491.729	768.263	743.827	551.237	446.826	704.233	648.048
	727.505	705.828	479.875	761.238	738.472	527.501	446.243	650.028	694.618
	706.739	710.925	512.343	692.925	738.954	532.616	437.814	624.872	655.981
	652.57	712.946	516.304	726.416	738.307	542.169	518.697	622.325	663.934
	625.578	714.286	503.586	738.262	736.593	533.251	450.51	617.29	646.101
	631.017	714.418	513.379	740.702	733.437	587.395	446.284	610.853	634.473
	644.803	716.351	520.975	744.369	736.095	519.467	443.012	603.622	634.23
	660.706	717.983	562.469	763.206	740.398	534.366	442.816	625.543	632.512
	632.056	721.85	535.086	757.686	734.952	522.159	440.729	620.966	604.502
	604.511	719.518	503.586	748.687	735.216	530.492	448.492	600.728	616.771
	630.048	715.525	502.926	767.954	737.426	537.259	440.561	593.907	672.941
	698.557	722.622	511.012	771.839	744.278	524.198	460.635	594.639	665.25
	622.231	608.221	522.449	776.648	745.181	516.247	463.006	615.322	649.552
	583.86	733.668	573.422	751.325	739.258	530.303	444.375	593.964	618.753
	640.494	554.67	538.254	763.394	750.253	552.604	426.967	587.162	658.863
	606.061	725.326	531.689	764.094	755.721	535.687	450.015	589.482	686.199
	623.267	729.104	556.096	760.907	750.927	496.245	453.332	623.016	664.507
	642.586	727.972	551.058	738.367	734.303	495.968	526.397	641.554	675.865
	605.724	726.913	554.321	769.596	749.437	501.051	458.183	669.371	652.471
	696.313	728.999	533.061	760.947	729.842	522.31	488.52	614.836	672.718
	758.001	732.127	515.805	764.993	733.55	577.132	431.171	585.144	683.333
	741.014	730.986	539.95	763.76	739.167	520.733	434.804	603.046	680.272
	687.566	732.254	557.801	755.2	728.018	491.385	435.887	562.933	665.136
	686.264	725.062	608.14	744.021	732.928	499.244	441.199	556.758	676.761
	669.832	710.469	536.504	745.484	737.732	498.404	430.607	555.24	655.396
	712.367	710.213	568.153	754.166	744.702	493.051	488.004	555.154	641.348
	667.208	704.438	522.137	750.083	748.307	516.142	523.484	555.671	620.417
	665.895	703.047	526.236	750.646	745.192	491.033	408.227	598.542	621.562
	703.563	719.688	528.083	762.68	750.377	505.455	399.512	587.286	621.433
	682.887	714.858	516.874	757.317	747.064	523.56	405.962	636.197	657.92
	670.544	720	510.69	763.122	726.828	568.216	409.019	602.331	612.469
	666.189	744.394	508.005	756.894	731.185	502.675	438.467	562.295	600.102
	678.261	746.295	512.044	754.758	728.896	525.729	423.118	581.743	587.973
	682.7	742.857	546.199	743.642	734.39	525.197	426.071	562.817	586.645
	689.585	611.657	540.034	758	738.2	531.242	427.523	553.47	630.989
	675.197	740.492	522.423	761.421	740.24	539.557	419.276	566.579	603.673
	685.407	738.229	533.441	757.585	754.78	537.211	414.938	559.115	595.21
	683.32	736.166	592.074	376.448	754.841	529.848	417.998	580.17	586.273
	706.513	729.589	554.022	760.557	748.122	529.457	432.729	540.512	591.801
	722.599	736.431	663.796	653.951	747.683	532.983	447.874	547.68	620.362
	752.995	534.809	665.571	735.846	745.819	531.565	447.107	562.257	612.759
	740.396	736.488	637.429		742.875	536.039	593.094	542.446	594.463
	720.329	726.422	538.048		733.092	524.422	550.892	636.162	575.944
	719.592	730.631	506.495		720.748	547.434	575.011	554.434	583.708
	734.745	727.147	509.574		749.319	611.689	582.585	549.417	575.571
	777.389	719.401	504.329		734.218	598.726	572.476	556.242	627.798
	778.191	729.119	505.393		749.736	562.225	595.404	608.075	610.255

## Sheet: Temperature
time	Vehicle				CNO (3 mg/kg)
	34.603	35.334	36.157	37.024	34.798	36	35.54	36.247	35.128	34.647
	34.587	35.306	36.155	37.067	34.855	36.073	35.537	36.277	35.069	34.777
	34.59	35.234	36.155	37.1	34.87	36.145	35.544	36.262	34.993	37.153
	34.596	35.186	36.152	37.056	34.789	36.201	35.537	36.253	34.947	34.738
	34.611	35.147	36.149	36.976	34.729	36.306	35.538	36.275	34.91	34.726
	34.6	35.124	36.16	37.004	34.654	36.33	35.538	36.276	34.876	34.659
	34.609	35.241	36.138	36.982	34.569	36.237	35.541	36.25	34.837	34.598
	34.573	35.365	36.136	36.928	34.521	36.175	35.536	36.265	34.816	34.582
	34.612	35.588	36.146	36.933	34.511	36.273	35.533	36.233	34.773	34.604
	34.66	35.603	36.143	36.979	34.762	36.334	35.531	36.243	34.693	34.698
	35.002	35.672	36.156	37.026	35.053	36.277	35.534	36.258	34.66	34.812
	35.488	35.738	36.165	36.952	35.242	36.102	35.514	36.24	34.652	34.889
	35.826	35.671	36.156	36.985	35.376	35.954	35.513	36.246	34.651	34.939
	36.022	35.583	36.101	36.971	35.447	35.838	35.518	36.253	34.642	34.966
	36.154	35.588	36.052	36.991	35.502	35.73	35.525	36.247	34.633	35.037
	36.132	35.68	36.014	36.935	35.547	35.604	35.535	36.222	34.635	35.09
	35.967	35.644	36.02	36.921	35.572	35.54	35.538	36.188	34.636	35.122
	35.829	35.672	36.074	36.954	35.585	35.448	35.544	36.17	34.643	35.15
	35.85	35.679	36.121	36.998	35.586	35.385	35.547	36.145	34.651	35.152
	36.057	35.626	36.114	36.958	35.605	35.354	35.57	36.121	34.659	35.113
	36.169	35.575	36.012	36.992	35.6	35.329	35.567	36.092	34.674	35.102
	36.056	35.57	35.895	36.981	35.6	35.262	35.574	36.063	34.694	35.095
	35.842	35.531	35.813	36.946	35.535	35.22	35.587	36.061	34.688	35.08
	35.641	35.284	35.778	36.941	35.549	35.217	35.597	36.065	34.683	35.072
	35.475	35.074	35.75	36.936	35.574	35.192	35.604	36.069	34.651	35.091
	35.373	34.935	35.726	36.917	35.584	35.181	35.606	36.072	34.641	35.096
	35.264	34.85	35.694	36.966	35.574	35.177	35.595	36.06	34.671	35.11
	35.161	34.804	35.684	36.982	35.58	35.212	35.596	36.056	34.726	35.12
	35.071	34.778	35.678	36.964	35.463	35.28	35.601	36.051	34.777	35.102
	35.013	34.79	35.667	36.949	35.314	35.383	35.596	36.045	34.821	35.081
	35.02	34.803	35.662	36.954	35.177	35.513	35.595	36.045	34.848	35.065
	34.863	34.805	35.665	36.954	35.057	35.582	35.631	36.038	35.035	35.041
	34.68	34.808	35.668	36.931	35.005	35.65	35.652	36.013	35.18	35.017
	34.538	34.825	35.678	36.899	34.965	35.769	35.655	36.001	35.257	35.005
	34.385	34.833	35.673	36.868	34.928	35.841	35.658	36.012	35.302	34.99
	34.438	34.9	35.675	36.834	34.896	35.909	35.664	36.021	35.342	34.99
	34.411	34.968	35.676	36.805	34.859	35.964	35.666	36.02	35.372	35.001
	34.388	35.016	35.683	36.822	34.853	35.92	35.673	36.021	35.401	35.004
	34.285	35.047	35.687	36.833	34.838	35.887	35.67	36.035	35.42	35.008
	34.267	35.067	35.699	36.832	34.824	35.884	35.67	36.102	35.439	35.011
	34.202	35.076	35.704	36.814	34.82	35.871	35.669	36.079	35.449	35.02
	34.146	35.085	35.704	36.807	34.786	35.891	35.653	36.077	35.459	35.044
	34.101	35.09	35.703	36.786	34.745	35.903	35.674	36.077	35.458	35.03
	34.228	35.068	35.711	36.778	34.738	35.907	35.727	36.09	35.463	35.004
	34.326	35.044	35.711	36.754	34.7	35.93	35.737	36.094	35.472	34.929
	34.4	35.062	35.712	36.732	34.718	35.961	35.675	36.1	35.477	34.92
	34.48	35.054	35.731	36.702	34.68	35.985	35.615	36.094	35.434	34.937
	34.518	35.036	35.742	36.658	34.646	35.995	35.612	36.11	35.402	35.102
	34.571	35.008	35.756	36.68	34.639	36.031	35.729	36.099	35.329	35.251
	34.572	34.915	35.765	36.688	34.637	36.047	35.813	36.091	35.331	35.111
	34.596	34.815	35.777	36.713	34.64	36.03	35.804	36.101	35.391	35.081
	34.486	35.066	35.79	36.753	34.645	36.052	35.774	36.068	35.391	35.042
	34.883	35.188	35.8	36.786	34.656	36.063	35.804	36.036	35.324	34.988
	35.083	35.287	35.805	36.836	34.672	36.062	35.869	36.048	35.247	34.986
	35.183	35.25	35.83	36.87	34.696	36.046	35.92	36.101	35.216	34.948
	35.066	35.165	35.84	36.886	34.686	36.052	35.947	36.106	35.203	34.902
	34.886	35.105	35.842	36.929	34.682	36.089	35.899	36.101	35.222	34.883
	34.749	35.044	35.852	36.939	34.683	36.094	35.903	36.074	35.182	34.889
	34.609	34.923	35.867	36.948	34.726	36.113	35.904	36.043	35.09	34.897
	34.476	34.839	35.878	36.94	34.756	36.127	35.912	36.168	34.942	34.909
	34.385	34.864	35.891	36.939	34.783	36.153	35.986	36.188	34.902	34.92
	34.317	34.842	35.892	36.987	34.874	36.183	35.975	36.221	34.899	34.935
	34.263	34.801	35.898	37.081	34.98	36.167	35.944	36.23	34.954	35.074
	34.228	34.757	35.876	37.118	35.069	36.131	35.915	36.227	35.039	35.459
	34.203	34.838	35.879	37.102	35.127	36.128	35.849	36.237	35.11	35.671
	34.179	34.837	35.886	37.125	35.172	36.121	35.813	36.256	35.175	35.759
	34.166	34.776	35.881	37.117	35.206	36.115	35.828	36.266	35.228	35.732
	34.157	34.719	35.868	37.097	35.217	36.15	35.877	36.285	35.255	35.525
	34.15	34.672	35.871	37.07	35.233	36.142	35.875	36.292	35.219	35.271
	34.143	34.648	35.867	37.119	35.285	36.153	35.899	36.289	35.174	35.048
	34.133	34.633	35.852	37.106	35.326	36.184	35.86	36.296	35.15	34.916
	34.146	34.632	35.847	37.16	35.354	36.16	35.835	36.302	35.145	34.865
	34.138	34.636	35.842	37.194	35.405	36.123	35.827	36.28	35.147	34.845
	34.147	34.624	35.826	37.215	35.451	36.099	35.795	36.283	35.155	34.877
	34.147	34.654	35.83	37.262	35.485	36.088	35.869	36.283	35.165	34.909
	34.151	34.676	35.823	37.228	35.534	36.078	35.916	36.226	35.189	34.935
	34.142	34.69	35.825	37.232	35.571	36.057	35.959	36.139	35.202	34.951
	34.131	34.698	35.821	37.234	35.592	36.048	35.91	36.091	35.205	34.961
	34.129	34.698	35.83	37.259	35.616	36.044	35.856	36.063	35.224	34.965
	34.194	34.681	35.835	37.242	35.631	36.034	35.808	36.036	35.288	34.968
	34.288	34.698	35.826	37.191	35.643	36.034	35.775	35.992	35.308	34.974
	34.42	34.769	35.829	37.127	35.657	36.028	35.726	35.963	35.322	34.973
	34.491	34.837	35.828	37.07	35.69	36.014	35.676	35.907	35.329	35.018
	34.504	34.879	35.816	36.996	35.719	36.034	35.615	35.895	35.337	35.064
	34.507	34.952	35.777	36.952	35.756	36.047	35.553	35.902	35.335	35.1
	34.537	35.096	35.742	36.903	35.781	36.081	35.505	35.893	35.33	35.12
	34.546	35.062	35.76	36.86	35.79	36.081	35.471	35.904	35.32	35.143
	34.533	35.016	35.794	36.821	35.81	36.082	35.447	35.896	35.314	35.17
	34.5	34.981	35.824	36.822	35.844	36.053	35.426	35.903	35.319	35.166
	34.473	34.962	35.852	36.812	35.835	36.058	35.413	35.91	35.302	35.368
	34.443	34.953	35.858	36.789	35.84	36.055	35.395	35.911	35.289	35.533
	34.385	34.958	35.879	36.8	35.784	36.045	35.383	35.908	35.278	35.638
	34.482	34.97	35.875	36.787	35.713	36.038	35.37	35.919	35.268	35.709
	34.489	34.932	35.886	36.76	35.648	36.034	35.371	35.913	35.268	35.75
	34.482	34.904	35.859	36.73	35.633	36.03	35.36	35.917	35.269	35.775
	34.507	34.899	35.889	36.713	35.574	36.027	35.362	35.904	35.288	35.801
	34.443	34.902	35.913	36.682	35.525	36.041	35.349	35.917	35.307	35.811
	34.435	34.906	35.916	36.654	35.499	36.101	35.347	35.951	35.314	35.791
	34.439	34.909	35.927	36.622	35.477	36.182	35.345	35.935	35.295	35.675
	34.466	34.927	35.931	36.606	35.455	36.223	35.349	35.928	35.28	35.583
	34.488	34.96	35.928	36.632	35.462	36.216	35.344	35.917	35.26	35.495
	34.445	34.988	35.923	36.638	35.44	36.241	35.346	35.926	35.242	35.452
	34.431	35.009	35.923	36.645	35.421	36.247	35.348	35.944	35.216	35.424
	34.432	35.064	35.921	36.64	35.42	36.291	35.348	35.949	35.2	35.413
	34.44	35.086	35.917	36.634	35.411	36.285	35.348	35.964	35.187	35.399
	34.439	35.07	35.916	36.609	35.43	36.381	35.346	35.958	35.18	35.398
	34.421	35.01	35.935	36.621	35.404	36.34	35.339	35.971	35.169	35.384
	34.489	34.929	35.936	36.636	35.384	36.248	35.34	35.979	35.167	35.357
	34.507	34.928	35.946	36.657	35.696	36.1	35.34	35.989	35.156	35.344
	34.536	34.98	35.936	36.649	34.963	35.986	35.335	35.998	35.142	35.33
	34.586	35.044	35.921	36.611	35.03	35.885	35.327	35.998	35.146	35.319
	34.645	35.057	35.907	36.61	35.277	35.82	35.343	36.016	35.156	35.266
	34.597	35.059	35.891	36.62	35.239	35.81	35.37	36.03	35.159	35.168
	34.635	35.147	35.869	36.628	35.322	35.785	35.34	36.023	35.152	35.018
	34.684	35.235	35.868	36.637	35.36	35.814	35.294	36.023	35.159	34.896
	34.668	35.185	35.864	36.625	35.4	35.803	35.291	36.015	35.164	34.829
	34.686	35.112	35.855	36.62	35.379	35.815	35.343	36.044	35.215	34.796
	34.597	35.037	35.845	36.627	35.354	35.807	35.32	36.104	35.243	34.782
	34.548	34.989	35.867	36.617	35.396	35.833	35.336	36.127	35.266	34.773
	34.505	34.978	35.879	36.605	35.453	35.854	35.31	36.182	35.272	34.767
	34.47	34.995	35.877	36.589	35.498	35.873	35.301	36.183	35.338	34.772
	34.355	34.932	35.9	36.575	35.423	35.875	35.29	36.223	35.47	34.774
	34.27	34.874	35.915	36.542	35.484	35.868	35.279	36.25	35.544	34.779
	34.248	34.813	35.928	36.548	35.406	35.873	35.278	36.239	35.609	34.781
	34.207	34.753	35.953	36.572	35.283	35.963	35.265	36.221	35.687	34.787
	34.144	34.749	35.952	36.596	35.164	36.005	35.259	36.21	35.712	34.798
	34.152	34.754	35.937	36.59	35.098	36.025	35.251	36.195	35.698	34.809
	34.08	34.76	35.94	36.591	35.039	36.026	35.235	36.191	35.59	34.817
	34.051	34.726	35.942	36.605	34.978	36.063	35.228	36.175	35.46	34.823
	34.013	34.717	35.93	36.641	34.955	36.073	35.195	36.178	35.379	34.825
	33.941	34.835	35.933	36.651	34.904	36.07	35.177	36.174	35.297	34.827
	34.072	34.925	35.93	36.641	35.011	36.076	35.204	36.148	35.248	34.824
	34.217	35.042	35.913	36.621	35.146	36.08	35.215	36.147	35.297	34.821
	34.25	35.177	35.903	36.594	35.291	36.127	35.234	36.152	35.291	34.822
	34.332	35.164	35.905	36.558	35.326	36.141	35.228	36.143	35.213	34.819
	34.39	35.233	35.925	36.54	35.36	36.123	35.227	36.146	35.103	34.822
	34.478	35.175	35.942	36.501	35.404	36.059	35.227	36.128	35.032	34.829
	34.544	35.164	35.953	36.476	35.422	36.034	35.225	36.12	34.995	34.838
	34.519	35.119	35.949	36.482	35.397	36.008	35.247	36.116	34.926	34.851
	34.605	35.067	35.948	36.488	35.378	35.984	35.242	36.058	34.868	34.872
	34.638	35.015	35.945	36.478	35.47	35.953	35.276	36.028	34.807	34.918
	34.623	34.986	35.969	36.504	35.356	35.934	35.263	36.043	34.787	34.96
	34.667	35.044	35.979	36.532	35.234	35.927	35.263	36.068	34.855	34.993
	34.758	35.211	35.976	36.517	35.275	35.906	35.252	36.071	34.866	35.009
	34.717	35.305	36.016	36.484	35.265	35.891	35.245	36.057	34.784	35.021
	34.755	35.277	35.993	36.472	35.302	35.856	35.242	36.048	34.795	35.027
	34.75	35.252	36.086	36.457	35.346	35.832	35.231	36.048	34.784	35.026
	34.736	35.218	36.148	36.416	35.416	35.843	35.222	36.019	34.854	35.026
	34.796	35.226	36.153	36.385	35.414	35.819	35.225	36.016	34.846	35.023
	34.832	35.226	36.127	36.343	35.399	35.755	35.217	35.994	34.938	35.017
	34.862	35.291	36.077	36.323	35.577	35.721	35.203	35.994	35.041	34.983
	34.881	35.49	36.005	36.353	35.586	35.698	35.19	35.999	35.252	34.89
	34.869	35.407	35.974	36.371	35.542	35.712	35.191	36.013	35.356	34.99
	34.815	35.551	36.004	36.382	35.496	35.748	35.149	36.038	35.354	34.993
	34.797	35.659	36.126	36.386	35.452	35.793	35.249	36.041	35.433	34.993
	34.763	35.756	36.341	36.435	35.405	35.743	35.294	36.04	35.399	34.99
	34.665	35.865	36.417	36.465	35.468	35.72	35.312	36.042	35.358	35.003
	34.634	35.913	36.589	36.47	35.458	35.67	35.284	36.055	35.283	35.013
	34.543	35.855	36.613	36.434	35.447	35.638	35.222	36.069	35.247	35.015
	34.477	35.756	36.503	36.431	35.422	35.594	35.169	36.076	35.25	35.02
	34.434	35.792	36.377	36.464	35.405	35.565	35.112	36.082	35.263	35.02
	34.385	35.908	36.37	36.497	35.515	35.532	35.121	36.082	35.264	34.747
	34.325	35.969	36.367	36.515	35.552	35.524	35.172	36.083	35.241	34.905
	34.231	36.034	36.278	36.527	35.494	35.517	35.179	36.084	35.202	34.838
	34.234	36.049	36.214	36.541	35.472	35.55	35.163	36.063	35.141	35.031
	34.213	36.002	36.159	36.579	35.469	35.507	35.17	36.045	35.143	35.036
	34.238	35.998	36.148	36.528	35.603	35.52	35.181	36.014	35.174	35.034
	34.203	36.076	36.181	36.486	35.525	35.548	35.175	36.003	35.132	35.035
	34.182	36.116	36.209	36.459	35.563	35.516	35.199	35.998	35.117	35.037
	34.155	36.136	36.198	36.443	35.66	35.531	35.198	35.998	35.149	35.032
	34.128	36.089	36.21	36.413	35.734	35.605	35.222	35.987	35.161	35.032
	34.143	36.042	36.24	36.421	35.745	35.62	35.231	35.977	35.193	34.994
	34.204	36.065	36.206	36.435	35.841	35.669	35.233	35.968	35.169	35.138
	33.938	36.117	36.133	36.454	35.951	35.715	35.307	35.931	35.171	35.221
	34.483	36.081	36.168	36.527	35.924	35.728	35.361	35.902	35.214	35.252
	34.639	36.079	36.253	36.568	35.947	35.746	35.393	35.877	35.194	35.28
	34.723	36.031	36.231	36.574	35.878	35.741	35.422	35.863	35.208	35.313
	34.804	35.979	36.306	36.583	35.827	35.75	35.615	35.84	35.259	35.349
	34.829	36.022	36.417	36.637	35.869	35.742	35.729	35.836	35.274	35.375
	34.825	36.124	36.488	36.636	35.895	35.739	35.773	35.824	35.282	35.401
	34.855	36.222		36.545	35.918	35.717	35.762	35.825	35.288	35.422
	35.006	36.245	36.596	36.392	35.931	35.597	35.705	36.676	35.231	35.445
	34.955	36.263	36.65	36.775	35.989	35.703	35.756	35.889	34.644	35.468
	34.942	36.308	36.695	36.755	35.936	35.784	35.834	36.063	35.054	35.482
	35.024	36.325	36.748	36.819	35.763	35.778	35.887	35.94	35.028	35.494
	35.132	36.316	36.784	36.865	35.611	35.674	35.89	35.879	35.099	35.502
	35.226	36.302	36.715	36.886	35.496	35.613	35.915	35.94	35.15	35.503
	34.843	36.282	36.76	36.928	35.397	35.563	35.952	36.045	35.133	35.523
	35.391	36.245	36.818	36.916	35.326	35.579	35.934	36.118	35.135	35.431
	35.546	36.204	36.794	36.953	35.315	35.61	35.884	36.195	35.236	35.306
	35.535	36.166	36.823	36.958	35.392	35.573	35.853	36.182	35.184	35.235
	35.657	36.111	36.833	36.963	35.399	35.599	35.924	36.272	35.183	35.194
	35.34	36.087	36.814	36.97	35.361	35.596	35.952	36.178	35.314	35.192
	35.744	36.02	36.833	36.92	35.322	35.669	35.969	36.164	35.411	35.235
	35.795	35.975	36.831	36.938	35.301	35.725	35.999	36.4	35.443	35.243
	35.74	35.936	36.779	36.93	35.277	35.825	35.971	36.417	35.512	35.243
	35.661	35.916	36.779	36.977	35.213	35.834	36.043	36.454	35.499	35.241
	35.636	35.896	36.73	36.949	35.166	35.908	36.115	36.426	35.522	35.247
	35.459	35.876	36.714	36.931	35.194	35.949	36.131	36.477	35.48	35.253
	35.326	35.871	36.744	36.911	35.163	35.937	36.16	36.612	35.411	35.261
	35.308	35.857	36.844	36.945	35.187	35.878	36.232	36.621	35.431	35.273
	35.288	35.841	36.794	37.034	35.33	35.917	36.267	36.74	35.434	35.295
	35.248	35.834	36.851	37.099	35.237	35.803	36.294	36.806	35.417	35.301
	35.236	35.829	36.906	37.086	35.313	35.7	36.39	36.838	35.41	35.304
	35.111	35.818	36.903	37.091	35.564	35.725	36.461	36.921	35.39	35.31
	34.981	35.8	36.898	37.117	35.599	35.779	36.496	36.904	35.393	35.312
	35.047	35.781	36.913	37.125	35.575	35.853	36.502	36.875	35.453	35.311
	35.071	35.76	36.931	37.063	35.596	35.926	36.532	36.878	35.448	35.324
	35.047	35.736	36.922	37.081	35.566	36.04	36.546	36.857	35.34	35.336
	35.126	35.705	36.969	37.042	35.566	36.066	36.557	36.852	35.275	35.358
	35.252	35.707	37.04	37.004	35.569	36.134	36.565	36.848	35.289	35.336
	35.334	35.694	37.11	36.92	35.57	36.132	36.56	36.936	35.257	35.263
	35.277	35.678	37.121	36.878	35.647	36.117	36.628	36.962	35.199	35.159
	35.281	35.671	37.13	36.834	35.628	36.127	36.661	36.984	35.146	35.067
	35.406	35.662	37.087	36.793	35.62	36.281	36.644	36.98	35.156	35.001
	35.483	35.648	37.037	36.768	35.613	36.509	36.633	36.958	35.187	34.962
	35.433	35.641	36.955	36.734	35.624	36.701	36.629	36.94	35.155	34.926
	35.511	35.656	36.904	36.706	35.626	36.826	36.636	36.895	35.181	34.896
	35.617	35.675	36.871	36.659	35.672	36.824	36.669	36.867	35.273	34.875
	35.644	35.681	36.799	36.644	35.673	36.761	36.665	36.886	35.225	34.872
	35.539	35.689	36.744	36.621	35.7	36.8	36.646	36.922	35.16	34.868
	35.342	35.688	36.698	36.588	35.719	36.646	36.678	36.927	35.161	34.865
	35.198	35.691	36.684	36.559	35.792	36.429	36.658	37.029	35.219	34.866
	35.227	35.688	36.658	36.532	35.853	36.238	36.638	37.028	35.237	34.876
	35.23	35.687	36.633	36.516	35.852	36.094	36.602	37.068	35.349	34.884
	35.185	35.688	36.603	36.491	35.995	35.985	36.653	37.095	35.423	34.895
	35.18	35.697	36.578	36.465	36.19	35.895	36.681	37.092	35.402	34.897
	35.151	35.694	36.565	36.445	36.402	35.833	36.667	37.075	35.349	34.912
	35.126	35.693	36.553	36.426	36.37	35.785	36.671	37.083	35.298	34.932
	35.306	35.692	36.528	36.4	36.199	35.74	36.647	37.062	35.135	34.946
	35.703	35.693	36.5	36.407	36.014	35.785	36.69	36.908	34.997	34.971
	36.15	35.688	36.473	36.449	35.841	35.837	36.68	36.832	34.987	34.981
	36.431	35.692	36.446	36.466	35.662	35.877	36.693	36.851	34.981	35.001
	36.627	35.691	36.41	36.458	35.487	35.977	36.617	36.894	34.971	35.028
	36.479	35.692	36.369	36.462	35.335	35.998	36.589	36.938	34.891	35.053
	36.144	35.731	36.338	36.451	35.235	35.898	36.595	36.991	34.736	35.072
	35.811	35.765	36.301	36.453	35.132	35.988	36.593	37.075	34.642	35.095
	35.513	35.767	36.259	36.435	35.054	35.994	36.604	37.097	34.586	35.101
	35.343	35.783	36.253	36.431	34.978	36.023	36.617	37.063	34.579	35.109
	35.116	35.806	36.246	36.406	34.918	36.037	36.614	36.988	34.656	35.121
	34.876	35.832	36.225	36.459	34.875	36.085	36.646	36.971	34.856	35.14
	34.872	35.854	36.214	36.453	34.845	36.123	36.66	37.023	34.874	35.158
	34.77	35.881	36.227	36.434	34.817	36.136	36.741	37.016	34.757	35.157
	34.691	35.904	36.221	36.415	34.796	36.157	36.803	36.906	34.775	35.11
	34.592	35.926	36.211	36.394	34.798	36.166	36.79	36.904	34.808	35.077
	34.935	35.937	36.213	36.36	34.84	36.174	36.805	36.864	34.764	35.055
	34.912	35.947	36.206	36.345	34.891	36.185	36.825	36.824	34.709	35.046
	34.909	35.957	36.191	36.31	34.924	36.211	36.793	36.796	34.693	35.047
	34.884	35.974	36.193	36.295	34.957	36.208	36.816	36.804	34.766	35.065
	34.872	35.983	36.179	36.287	34.958	36.219	36.84	36.836	34.7	35.025
	34.872	35.989	36.179	36.267	34.965	36.237	36.848	36.893	34.689	34.946
	34.122	35.997	36.171	36.248	34.953	36.256	36.867	36.883	34.657	34.879
	34.406	36.006	36.162	36.244	34.96	36.277	36.857	36.913	34.63	34.823
	34.687	36.012	36.154	36.241	35.002	36.302	36.859	36.908	34.62	34.79
	34.832	36.012	36.149	36.236	35.028	36.318	36.862	36.864	34.61	34.769
	34.792	36.015	36.143	36.232	35.003	36.363	36.888	36.854	34.617	34.754
	34.691	36.014	36.137	36.228	34.998	36.381	36.876	36.872	34.61	34.743
	34.61	36.007	36.186	36.21	34.995	36.402	36.88	36.896	34.599	34.725
	34.526	36.013	36.223	36.193	34.983	36.429	36.881	36.912	34.558	34.705
	34.48	36.006	36.24	36.275	34.994	36.465	36.864	36.862	34.571	34.693
	34.426	35.958	36.292	36.305	35.014	36.475	36.81	36.869	34.565	34.686
	34.375	35.882	36.343	36.34	35.013	36.529	36.87	36.859	34.51	34.684
	34.35	35.795	36.376	36.379	35.021	36.576	36.904	36.87	34.416	34.707
	34.328	35.729	36.388	36.388	35.023	36.645	36.907	36.882	34.244	34.734
	34.301	35.691	36.399	36.396	35.041	36.684	36.926	36.894	34.146	34.756
	34.274	35.675	36.382	36.378	35.153	36.727	36.948	36.551	34.089	34.788
	34.227	35.758	36.379	36.358	35.23	36.778	36.921	36.887	34.073	34.827
	34.198	35.813	36.348	36.338	35.268	36.791	36.91	36.876	34.086	34.864
	34.145	35.857	36.34	36.314	35.303	36.828	36.882	36.878	34.111	34.891
	34.118	35.893	36.322	36.29	35.335	36.863	36.855	36.854	34.137	34.931
	34.049	35.922	36.309	36.269	35.367	36.882	36.849	36.89	34.153	34.947
	34.038	35.945	36.317	36.247	35.38	36.908	36.869	36.891	34.178	35.059
	34.001	35.979	36.304	36.228	35.398	36.946	36.837	36.872	34.207	35.122
	33.991	36.018	36.333	36.204	35.403	36.96	36.851	36.899	34.243	35.165
	33.986	36.025	36.352	36.18	35.416	36.962	36.834	36.916	34.286	35.166
	34.004	36.033	36.391	36.163	35.431	36.982	36.842	36.936	34.303	35.157
	34.035	36.024	36.424	36.132	35.442	37.002	36.88	36.961	34.324	35.073
	34.049	36.011	36.423	36.088	35.445	37.021	36.896	36.986	34.339	35.005
	34.06	35.996	36.428	36.048	35.45	37.037	36.911	37.014	34.346	34.964
	34.046	35.989	36.433	36.016	35.453	37.052	36.897	37.029	34.372	34.931
	34.054	35.961	36.553	35.984	35.454	37.079	36.946	37.056	34.446	34.936
	34.047	35.938	36.706	35.967	35.474	37.053	36.945	37.09	34.459	34.951
	34.06	35.928	36.839	35.947	35.497	37.016	36.925	37.079	34.428	34.963
	34.172	35.916	36.955	35.927	35.511	36.968	36.916	37.109	34.425	34.969
	34.242	35.897	37.012	35.915	35.557	36.954	36.887	37.148	34.464	34.969
	34.3	35.885	37.043	35.908	35.607	36.958	36.876	37.183	34.459	34.98
	34.303	35.886	37.081	35.894	35.643	36.962	36.834	37.212	34.423	34.998
	34.299	35.877	37.101	35.887	35.667	36.949	36.837	37.243	34.39	35.019
	34.268	35.871	37.054	36.015	35.738	36.923	36.85	37.262	34.366	35.031
	34.235	35.847	37.091	36.098	35.793	36.878	36.837	37.242	34.339	35.035
	34.28	35.864	37.134	36.091	35.84	36.835	36.826	37.211	34.313	34.973
	34.324	35.848	37.099	36.111	35.875	36.794	36.742	37.196	34.294	34.913
	34.359	35.825	37.027	36.109	35.911	36.762	36.677	37.203	34.278	34.901
	34.394	35.794	36.944	36.145	35.949	36.788	36.622	37.221	34.28	34.914
	34.426	35.782	36.891	36.168	35.965	36.803	36.597	37.225	34.388	34.93
	34.471	35.763	36.846	36.184	35.973	36.809	36.57	37.251	34.669	34.962
	34.594	35.745	36.869	36.22	35.99	36.851	36.547	37.275	34.741	34.985
	34.631	35.729	36.858	36.223	35.995	36.884	36.527	37.299	34.74	35.006
	34.622	35.702	36.826	36.212	35.984	36.889	36.508	37.323	34.767	35.029
	34.634	35.767	36.794	36.226	35.957	36.876	36.481	37.333	34.819	35.04
	34.646	35.813	36.762	36.229	35.913	36.86	36.497	37.355	34.892	35.054
	34.629	35.808	36.739	36.209	35.88	36.838	36.452	37.362	34.966	35.064
	34.66	35.815	36.717	36.188	35.869	36.841	36.397	37.386	34.953	35.079
	34.67	35.848	36.687	36.166	35.874	36.848	36.481	37.425	34.937	35.098
	34.655	35.858	36.659	36.15	35.882	36.849	36.595	37.448	34.929	35.111
	34.671	35.859	36.643	36.117	35.899	36.836	36.621	37.47	34.936	35.144
	34.747	35.843	36.623	36.087	35.883	36.818	36.595	37.49	34.952	35.176
	34.781	35.797	36.605	36.087	35.927	36.808	36.584	37.537	34.983	35.196
	34.825	35.753	36.594	36.074	35.951	36.834	36.633	37.563	35.018	35.211
	34.81	35.719	36.568	36.066	36.001	36.841	36.648	37.585	35.042	35.222
	34.775	35.733	36.548	36.116	35.991	36.828	36.613	37.597	35.06	35.229
	34.765	35.76	36.524	36.191	36.065	36.811	36.606	37.62	35.148	35.242
	34.758	35.752	36.51	36.203	36.081	36.805	36.613	37.64	35.207	35.259
	34.695	35.694	36.486	36.194	36.072	36.806	36.611	37.651	35.225	35.26
	34.688	35.605	36.468	36.169	36.064	36.812	36.65	37.657	35.22	35.247
	34.758	35.592	36.438	36.139	36.089	36.798	36.643	37.663	35.186	35.239
	34.809	35.573	36.401	36.136	36.081	36.803	36.619	37.678	35.146	35.242
	34.846	35.474	36.407	36.133	36.013	36.792	36.602	37.689	35.12	35.245
	34.821	35.398	36.398	36.109	35.978	36.784	36.58	37.702	35.109	35.249
	34.841	35.314	36.392	36.113	35.951	36.78	36.56	37.717	35.142	35.246
	34.865	35.312	36.389	36.102	35.917	36.753	36.561	37.756	35.144	35.248
	34.884	35.373	36.384	36.091	35.893	36.75	36.58	37.792	35.137	35.26
	34.93	35.455	36.384	36.1	35.876	36.759	36.614	37.984	35.127	35.262
	34.878	35.507	36.389	36.124	35.859	36.749	36.626	37.992	35.121	35.269
	34.897	35.543	36.398	36.137	35.847	36.748	36.65	37.937	35.128	35.273
	34.902	35.569	36.406	36.141	35.837	36.761	36.683	37.868	35.142	35.279
	34.909	35.587	36.406	36.18	35.835	36.784	36.71	37.795	35.157	35.286
	34.951	35.551	36.43	36.242	35.82	36.786	36.742	37.743	35.172	35.292
	34.929	35.5	36.436	36.321	35.827	36.782	36.765	37.687	35.18	35.296
	34.936	35.452	36.43	36.381	35.885	36.812	36.793	37.657	35.216	35.317
	34.916	35.361	36.443	36.457	35.925	36.832	36.821	37.598	35.251	35.322
	34.858	35.303	36.455	36.406	36.004	36.882	36.845	37.652	35.177	35.329
	34.891	35.254	36.464	36.342	36.061	36.941	36.871	37.671	35.055	35.329
	34.928	35.186	36.469	36.307	36.084	36.932	36.898	37.67	34.974	35.345
	34.92	35.142	36.47	36.209	36.107	36.975	36.93	37.643	34.906	35.306
	34.886	35.099	36.45	36.381	36.118	37.005	36.975	37.61	34.853	35.266
	34.9	35.112	36.433	36.509	36.129	36.994	37.008	37.591	34.808	35.248
	34.752	35.089	36.427	36.55	36.128	36.993	37.043	37.591	34.768	35.25
	34.689	35.189	36.433	36.574	36.123	36.976	37.056	37.6	34.742	35.261
	34.753	35.33	36.441	36.614	36.111	36.961	37.095	37.604	34.671	35.27
	34.73	35.366	36.447	36.614	36.102	36.949	37.122	37.611	34.615	35.284
	34.712	35.418	36.45	36.663	36.099	36.939	37.15	37.624	34.584	35.304
	34.779	35.487	36.441	36.635	36.099	36.933	37.186	37.622	34.564	35.328
	34.742	35.576	36.422	36.592	36.164	36.937	37.222	37.64	34.554	35.34
	34.729	35.57	36.409	36.631	36.25	36.941	37.243	37.669	34.553	35.371
	34.759	35.494	36.374	36.599	36.212	36.925	37.275	37.673	34.561	35.352
	34.755	35.476	36.388	36.563	36.237	36.925	37.308	37.676	34.569	35.369
	34.739	35.438	36.352	36.525	36.325	36.906	37.304	37.686	34.577	35.411
	34.713	35.401	36.349	36.575	36.345	36.904	37.324	37.692	34.624	35.456
	34.689	35.277	36.342	36.534	36.343	36.898	37.337	37.687	34.587	35.486
	34.74	35.218	36.352	36.529	36.241	36.905	37.364	37.685	34.483	35.499
	34.708	35.166	36.349	36.52	36.145	36.897	37.379	37.699	34.429	35.51
	34.661	35.15	36.364	36.493	36.161	36.884	37.405	37.715	34.431	35.514
	34.622	35.097	36.394	36.47	36.16	36.882	37.427	37.725	34.442	35.524
	34.574	35.029	36.411	36.435	36.168	36.884	37.423	37.733	34.496	35.563
	34.522	35.007	36.427	36.407	36.267	36.896	37.439	37.768	34.541	35.586
	34.466	34.997	36.44	36.383	36.211	36.943	37.454	37.808	34.571	35.603
	34.387	34.975	36.451	36.361	36.135	36.912	37.475	37.849	34.601	35.62
	34.341	35.022	36.465	36.338	36.074	36.912	37.489	37.863	34.638	35.712
	34.379	35.061	36.463	36.325	36.019	36.876	37.502	37.893	34.673	35.796
	34.445	35.078	36.459	36.311	35.982	36.843	37.511	37.898	34.712	35.869
	34.443	35.107	36.493	36.299	35.951	36.808	37.509	37.908	34.739	35.933
	34.421	35.203	36.523	36.255	35.941	36.785	37.542	37.869	34.783	35.982
	34.403	35.22	36.516	36.228	35.922	36.764	37.601	37.819	34.786	36.02
	34.385	35.211	36.531	36.227	35.923	36.74	37.621	37.784	34.779	36.054
	34.391	35.285	36.603	36.209	35.922	36.729	37.623	37.752	34.772	36.074
	34.406	35.282	36.64	36.197	35.93	36.719	37.627	37.714	34.78	36.093
	34.411	35.253	36.625	36.182	35.903	36.715	37.644	37.712	34.782	36.099
	34.433	35.271	36.585	36.175	35.877	36.725	37.655	37.726	34.769	36.097
	34.451	35.283	36.558	36.15	35.863	36.725	37.629	37.727	34.756	36.076
	34.473	35.258	36.552	36.122	35.86	36.741	37.593	37.723	34.746	36.061
	34.506	35.257	36.6	36.122	35.859	36.748	37.595	37.747	34.795	36.044
	34.52	35.239	36.645	36.118	35.852	36.805	37.601	37.744	34.846	36.047
	34.525	35.221	36.615	36.091	35.852	36.845	37.601	37.762	34.868	36.052
	34.54	35.191	36.697	36.122	35.82	36.886	37.609	37.784	34.888	36.052
	34.545	35.246	36.785	36.152	35.803	36.909	37.601	37.789	34.919	36.009
	34.606	35.213	36.809	36.154	35.801	36.946	37.574	37.79	34.955	35.962
	34.623	35.245	36.853	36.16	35.789	36.962	37.564	37.796	34.991	35.934
	34.65	35.246	36.919	36.146	35.772	36.961	37.548	37.811	35.006	35.917
	34.672	35.213	36.898	36.149	35.739	36.955	37.533	37.834	35.017	35.897
	34.712	35.166	36.886	36.122	35.695	36.955	37.538	37.852	35.04	35.873
	34.749	35.07	36.814	36.111	35.704	36.959	37.55	37.863	35.059	35.85
	34.765	35.271	36.861	36.07	35.721	36.96	37.574	37.878	35.099	35.887
	34.746	35.397	36.865	36.074	35.73	36.951	37.588	37.895	35.201	35.926
	34.732	35.379	36.86	36.062	35.75	36.949	37.599	37.9	35.255	35.947
	34.755	35.377	36.861	36.036	35.77	36.955	37.605	37.932	35.267	35.977
	34.761	35.339	36.737	36.027	35.776	36.966	37.604	37.939	35.262	35.984
	34.791	35.274	36.752	36	35.793	36.961	37.595	37.954	35.264	35.99
	34.803	35.286	36.764	35.943	35.801	36.962	37.596	37.982	35.261	36.001
	34.817	35.259	36.816	35.893	35.822	36.971	37.568	37.999	35.264	36.012
	34.84	35.207	36.713	35.839	35.843	36.969	37.553	38.019	35.262	36.027
	34.806	35.192	36.702	35.787	35.867	36.967	37.553	38.038	35.265	36.047
	34.788	35.192	36.793	35.738	35.884	36.951	37.544	38.066	35.265	36.065
	34.751	35.224	36.895	35.708	35.895	36.931	37.54	38.069	35.274	36.078
	34.726	35.208	36.925	35.686	35.916	36.903	37.552	38.071	35.279	36.094
	34.743	35.235	36.752	35.651	35.927	36.902	37.557	38.09	35.289	36.111
	34.779	35.195	36.638	35.649	35.944	36.889	37.553	38.119	35.3	36.13
	34.825	35.214	36.59	35.648	35.952	36.873	37.543	38.153	35.301	36.147
	34.838	35.247	36.514	35.647	35.955	36.862	37.536	38.189	35.304	36.16
	34.867	35.206	36.482	35.652	35.949	36.851	37.534	38.209	35.314	36.174
	34.879	35.241	36.446	35.651	35.932	36.836	37.529	38.232	35.33	36.185
	34.886	35.376	36.432	35.658	35.927	36.83	37.538	38.236	35.391	36.197
	34.884	35.487	36.41	35.658	35.908	36.831	37.542	38.264	35.453	36.212
	34.915	35.615	36.355	35.661	35.858	36.832	37.537	38.279	35.482	36.254
	34.935	35.707	36.302	35.661	35.883	36.835	37.542	38.288	35.469	36.301
	34.919	35.753	36.274	35.653	35.928	36.842	37.539	38.293	35.448	36.314
	34.984	35.797	36.273	35.649	35.932	36.875	37.548	38.309	35.449	36.295
	35.059	35.812	36.284	35.663	35.868	36.891	37.555	38.306	35.497	36.273
	35.04	35.81	36.324	35.652	35.807	36.9	37.569	38.31	35.549	36.257
	34.99	35.831	36.388	35.64	35.74	36.939	37.59	38.315	35.577	36.254
	34.947	35.792	36.361	35.644	35.683	36.952	37.617	38.31	35.604	36.25
	34.905	35.718	36.342	35.657	35.654	36.981	37.635	38.305	35.631	36.224
	34.823	35.649	36.369	35.663	35.614	37.008	37.654	38.298	35.663	36.211
	34.745	35.582	36.317	35.668	35.594	37.02	37.663	38.314	35.689	36.203
	34.71	35.512	36.286	35.671	35.588	37.01	37.68	38.317	35.712	36.218
	34.68	35.443	36.258	35.662	35.607	36.995	37.693	38.326	35.718	36.248
	34.657	35.488	36.251	35.656	35.568	36.991	37.716	38.342	35.689	36.262
	34.676	35.541	36.245	35.664	35.519	36.978	37.767	38.368	35.675	36.294
	34.689	35.508	36.263	35.755	35.575	36.966	37.768	38.386	35.688	36.339
	34.71	35.467	36.248	35.807	35.634	36.937	37.797	38.358	35.703	36.393
	34.686	35.403	36.25	35.819	35.756	36.92	37.756	38.319	35.71	36.436
	34.708	35.445	36.272	35.822	35.879	36.907	37.727	38.308	35.715	36.478
	34.717	35.397	36.278	35.817	35.983	36.923	37.717	38.308	35.719	36.529
	34.704	35.385	36.245	35.819	36.017	36.936	37.714	38.312	35.724	36.57
	34.661	35.353	36.289	35.813	35.985	36.949	37.723	38.314	35.732	36.554
	34.622	35.165	36.329	35.808	35.958	36.966	37.724	38.321	35.746	36.524
	34.548	35.07	36.43	35.789	35.914	37.012	37.733	38.328	35.768	36.504
	34.53	35.142	36.483	35.788	35.878	37.05	37.744	38.334	35.789	36.507
	34.499	35.196	36.48	35.773	35.842	37.081	37.748	38.345	35.785	36.525
	34.466	35.253	36.582	35.822	35.818	37.096	37.752	38.352	35.782	36.57
	34.432	35.314	36.723	35.806	35.799	37.112	37.734	38.348	35.774	36.606
	34.424	35.347	36.803	35.828	35.788	37.119	37.736	38.316	35.763	36.638
	34.428	35.293	36.881	35.83	35.779	37.096	37.737	38.279	35.76	36.656
	34.415	35.161	36.951	35.821	35.784	37.071	37.747	38.282	35.761	36.671
	34.403	34.993	36.956	35.805	35.798	37.049	37.759	38.288	35.745	36.684
	34.416	35.017	36.915	35.817	35.81	37.019	37.754	38.29	35.729	36.69
	34.392	35.083	36.916	35.823	35.805	36.989	37.771	38.295	35.719	36.681
	34.341	35.211	36.903	35.821	35.873	36.958	37.774	38.311	35.705	36.677
	34.373	35.3	36.904	35.914	35.953	36.929	37.769	38.328	35.699	36.693
	34.463	35.314	36.881	35.963	36.027	36.913	37.773	38.331	35.691	36.734
	34.559	35.275	36.853	35.998	36.083	36.898	37.777	38.341	35.682	36.769
	34.691	35.162	36.906	35.947	36.127	36.888	37.762	38.355	35.679	36.796
	34.733	35.065	36.996	36.008	36.173	36.89	37.785	38.375	35.672	36.814
	34.775	35.076	36.943	36.084	36.198	36.896	37.803	38.389	35.662	36.825
	34.741	35.097	36.796	36.14	36.215	36.916	37.817	38.395	35.656	36.83
	34.836	35.123	36.756	36.182	36.233	36.94	37.814	38.39	35.65	36.824
	34.808	35.103	36.811	36.203	36.205	36.965	37.854	38.363	35.653	36.793
	34.788	35.012	36.91	36.215	36.138	36.997	37.892	38.355	35.658	36.772
	34.765	34.976	36.996	36.214	36.065	37.032	37.89	38.381	35.654	36.738
	34.754	34.861	36.956	36.197	36.018	37.028	37.888	38.394	35.657	36.694
	34.711	34.78	36.914	36.157	36.022	37.023	37.877	38.423	35.66	36.66
	34.629	34.722	36.856	36.105	36.057	37.029	37.878	38.431	35.67	36.646
	34.615	34.689	36.791	36.085	36.098	37.032	37.876	38.454	35.701	36.649
	34.628	34.671	36.791	36.083	36.123	37.026	37.874	38.469	35.752	36.653
	34.638	34.671	36.794	36.141	36.156	37.015	37.874	38.519	35.805	36.651
	34.655	34.68	36.792	36.215	36.186	37.001	37.865	38.528	35.844	36.58
	34.616	34.731	36.747	36.237	36.227	36.991	37.87	38.532	35.878	36.495
	34.543	34.659	36.72	36.263	36.28	36.974	37.89	38.533	35.906	36.367
	34.472	34.636	36.692	36.3	36.32	36.953	37.903	38.53	35.927	36.245
	34.432	34.63	36.659	36.339	36.346	36.927	37.912	38.529	35.948	36.163
	34.373	34.619	36.637	36.364	36.371	36.92	37.912	38.526	35.962	36.122
	34.373	34.61	36.619	36.394	36.388	36.907	37.901	38.531	35.981	36.101
	34.356	34.613	36.59	36.424	36.403	36.873	37.9	38.536	35.993	36.105
	34.338	34.611	36.563	36.41	36.386	36.86	37.892	38.542	36.002	36.109
	34.322	34.614	36.515	36.463	36.377	36.855	37.875	38.556	36.01	36.117
	34.34	34.616	36.535	36.498	36.319	36.859	37.865	38.621	36.02	36.126
	34.312	34.619	36.53	36.513	36.309	36.855	37.867	38.686	36.03	36.135
	34.342	34.629	36.519	36.555	36.296	36.863	37.867	38.724	36.092	36.147
	34.425	34.644	36.499	36.541	36.214	36.882	37.866	38.712	36.169	36.155
	34.492	34.67	36.471	36.517	36.193	36.89	37.867	38.752	36.118	36.149
	34.552	34.689	36.46	36.584	36.212	36.888	37.877	38.732	36.048	36.141
	34.605	34.702	36.446	36.589	36.232	36.892	37.869	38.818	35.982	36.157
	34.649	34.711	36.437	36.589	36.261	36.896	37.868	38.813	35.97	36.162
	34.669	34.724	36.414	36.664	36.299	36.899	37.867	38.777	35.977	36.142
	34.708	34.741	36.389	36.595	36.31	36.909	37.862	38.739	36	36.123
	34.691	34.758	36.352	36.621	36.325	36.93	37.865	38.708	36.026	36.109
	34.667	34.768	36.326	36.502	36.322	36.934	37.912	38.693	36.047	36.087
	34.691	34.773	36.294	36.606	36.3	36.95	37.965	38.685	36.054	36.056
	34.687	34.779	36.224	36.615	36.301	36.953	37.98	38.667	36.067	36.03
	34.738	34.794	36.174	36.627	36.247	36.953	37.95	38.737	36.076	36.011
	34.713	34.789	36.142	36.619	36.189	36.944	37.931	38.736	36.085	36
	34.614	34.772	36.136	36.584	36.139	36.945	37.937	38.715	36.086	35.989
	34.477	34.764	36.133	36.63	36.091	36.922	37.939	38.679	36.094	35.987
	34.39	34.767	36.251	36.596	36.079	36.896	37.939	38.632	36.097	35.956
	34.332	34.773	36.317	36.619	36.072	36.822	37.954	38.63	36.087	35.926
	34.247	34.787	36.313	36.677	36.068	36.749	37.934	38.656	36.073	35.91
	34.188	34.791	36.314	36.654	36.046	36.708	37.92	38.673	36.065	35.914
	34.175	34.798	36.333	36.615	36.021	36.672	37.914	38.691	36.055	35.886
	34.189	34.804	36.341	36.653	36.041	36.636	37.935	38.706	36.042	35.813
	34.151	34.787	36.386	36.619	36.088	36.59	37.993	38.717	36.034	35.743
	34.131	34.748	36.424	36.709	36.115	36.567	38.008	38.735	36.029	35.703
	34.088	34.728	36.46	36.786	36.105	36.548	37.984	38.764	36.023	35.691
	34.049	34.744	36.481	36.855	36.106	36.572	38.001	38.773	36.018	35.676
	34.017	34.745	36.491	36.909	36.122	36.569	38.015	38.791	36.009	35.668
	34.068	34.745	36.526	36.928	36.139	36.587	38.022	38.775	35.981	35.676
	34.046	34.742	36.563	36.92	36.132	36.602	38.057	38.758	35.944	35.698
	34.005	34.741	36.573	36.911	36.139	36.61	38.058	38.722	35.945	35.827
	33.977	34.764	36.566	36.85	36.15	36.622	38.058	38.619	35.947	35.866
	33.955	34.812	36.544	36.742	36.165	36.629	38.027	38.494	35.922	35.881
	33.948	34.891	36.519	36.663	36.184	36.631	38.004	38.388	35.901	35.909
	33.913	34.968	36.476	36.629	36.206	36.648	38.006	38.302	35.899	35.938
	33.982	35.034	36.486	36.597	36.22	36.662	38.02	38.234	35.902	35.957
	34.082	35.062	36.518	36.546	36.23	36.669	38.026	38.196	35.91	35.973
	34.169	35.094	36.629	36.507	36.213	36.672	37.977	38.17	35.92	35.978
	34.242	35.138	36.684	36.462	36.197	36.696	37.963	38.15	35.924	35.976
	34.389	35.151	36.657	36.417	36.182	36.715	37.949	38.131	35.927	35.988
	34.582	35.106	36.683	36.377	36.168	36.726	37.923	38.124	35.933	36.001
	34.435	35.073	36.669	36.35	36.158	36.734	37.896	38.148	35.938	36.024
	34.647	35.027	36.599	36.338	36.151	36.708	37.884	38.203	35.952	36.006
	34.712	34.978	36.469	36.302	36.144	36.679	37.863	38.233	35.96	35.993
	34.763	34.958	36.388	36.289	36.147	36.656	37.872	38.257	35.98	35.995
	34.803	34.93	36.384	36.257	36.133	36.642	37.86	38.284	35.999	36.003
	34.826	34.895	36.312	36.247	36.138	36.635	37.852	38.302	36.009	36.013
	34.93	34.875	36.236	36.221	36.169	36.619	37.868	38.323	36.023	36.025
	35.001	34.875	36.203	36.203	36.201	36.604	37.883	38.339	36.039	35.995
	35.027	34.937	36.241	36.166	36.229	36.604	37.893	38.349	36.051	35.983
	35.043	34.937	36.228	36.136	36.281	36.602	37.896	38.363	36.065	35.985
	35.044	34.936	36.262	36.127	36.366	36.589	37.917	38.37	36.073	35.995
	34.996	34.889	36.26	36.114	36.459	36.59	37.932	38.376	36.089	36.005
	34.865	34.827	36.24	36.106	36.496	36.592	37.94	38.386	36.112	35.993
	34.751	34.769	36.28	36.093	36.543	36.597	37.944	38.395	36.107	36.009
	34.69	34.724	36.238	36.078	36.565	36.598	37.951	38.401	36.073	36.022
	34.79	34.739	36.352	36.075	36.595	36.599	37.966	38.401	36.058	36.042
	34.84	34.793	36.494	36.067	36.604	36.6	37.97	38.416	36.048	36.162
	34.864	34.826	36.523	36.057	36.603	36.61	37.957	38.426	36.034	36.275
	34.929	34.85	36.547	36.045	36.584	36.614	37.941	38.431	36.032	36.354
	35.038	34.872	36.417	36.038	36.556	36.614	37.942	38.435	36.025	36.412
	34.917	34.886	36.383	36.038	36.537	36.609	37.931	38.447	36.017	36.464
	34.941	34.897	36.345	36.03	36.533	36.612	37.952	38.45	36.029	36.49
	35.149	34.991	36.468	36.025	36.514	36.61	37.984	38.457	36.045	36.521
	35.281	35.022	36.435	36.027	36.511	36.607	37.999	38.457	36.023	36.558
	35.218	34.987	36.369	36.111	36.523	36.602	38.024	38.46	35.982	36.612
	35.047	34.945	36.331	36.156	36.526	36.603	38.028	38.463	35.947	36.665
	34.986	34.925	36.354	36.148	36.518	36.607	38.031	38.463	35.948	36.718
	34.93	34.926	36.486	36.129	36.531	36.613	38.04	38.464	35.967	36.746
	34.837	34.921	36.556	36.11	36.549	36.603	38.054	38.467	35.987	36.777
	34.764	34.908	36.522	36.103	36.558	36.608	38.073	38.469	36.002	36.8
	34.661	34.892	36.519	36.092	36.571	36.604	38.1	38.461	36.036	36.821
	34.563	34.881	36.602	36.079	36.547	36.602	38.102	38.462	36.194	36.83
	34.465	34.868	36.635	36.075	36.505	36.594	38.105	38.461	36.306	36.813
	34.408	34.865	36.749	36.065	36.48	36.587	38.108	38.467	36.338	36.657
	34.35	34.892	36.885	36.059	36.485	36.592	38.118	38.466	36.398	36.462
	34.31	34.929	37.033	36.039	36.481	36.591	38.116	38.468	36.392	36.291
	34.269	34.938	37.067	36.079	36.485	36.596	38.114	38.466	36.414	36.163
	34.253	34.953	37.024	36.123	36.483	36.604	38.125	38.471	36.443	36.072
	34.249	34.955	36.95	36.135	36.486	36.619	38.142	38.48	36.481	36.01
	34.248	34.91	36.889	36.147	36.465	36.64	38.15	38.475	36.504	35.974
	34.229	34.897	36.871	36.128	36.45	36.645	38.151	38.47	36.535	35.946
	34.203	34.903	36.879	36.145	36.467	36.67	38.157	38.472	36.57	35.926
	34.192	34.912	36.847	36.125	36.484	36.688	38.142	38.474	36.616	35.928
	34.186	34.914	36.842	36.098	36.451	36.7	38.122	38.473	36.669	35.936
	34.173	34.941	36.803	36.08	36.465	36.731	38.14	38.475	36.703	35.946
	34.165	34.97	36.722	36.057	36.497	36.743	38.145	38.476	36.721	35.962
	34.177	34.99	36.595	36.042	36.489	36.756	38.149	38.461	36.747	35.98
	34.244	34.996	36.525	36.032	36.533	36.768	38.147	38.457	36.771	35.982
	34.369	34.998	36.48	36.021	36.586	36.772	38.147	38.44	36.792	35.981
	34.473	35	36.443	36.015	36.581	36.768	38.178	38.413	36.819	35.966
	34.537	35.004	36.406	36.01	36.553	36.767	38.173	38.377	36.804	35.946
	34.567	34.998	36.381	35.992	36.523	36.775	38.169	38.354	36.79	35.929
	34.578	34.983	36.364	35.979	36.503	36.78	38.165	38.33	36.781	35.97
	34.572	34.958	36.307	35.981	36.502	36.778	38.174	38.312	36.794	35.973
	34.582	34.931	36.278	35.958	36.522	36.765	38.168	38.294	36.808	35.897
	34.61	34.904	36.266	35.959	36.531	36.771	38.174	38.279	36.824	35.836
	34.62	34.875	36.252	35.956	36.548	36.768	38.162	38.276	36.829	35.798
	34.613	34.845	36.226	35.945	36.561	36.77	38.188	38.273	36.836	35.77
	34.606	34.817	36.201	35.935	36.578	36.768	38.206	38.263	36.841	35.761
	34.592	34.784	36.176	35.934	36.589	36.756	38.208	38.268	36.847	35.76
	34.589	34.842	36.163	35.934	36.604	36.762	38.214	38.251	36.861	35.737
	34.584	34.904	36.164	35.93	36.638	36.762	38.179	38.249	36.858	35.761
	34.602	34.933	36.158	35.922	36.645	36.775	38.182	38.257	36.851	35.745
	34.598	34.941	36.168	35.907	36.662	36.78	38.166	38.265	36.849	35.674
	34.594	34.95	36.173	35.915	36.677	36.78	38.153	38.269	36.847	35.606
	34.587	34.964	36.174	35.919	36.683	36.786	38.147	38.269	36.848	35.571
	34.563	34.993	36.183	35.917	36.683	36.8	38.161	38.26	36.848	35.544
	34.535	34.992	36.194	35.929	36.666	36.82	38.181	38.24	36.863	35.552
	34.565	34.986	36.199	35.923	36.668	36.844	38.167	38.228	36.879	35.529
	34.681	34.982	36.193	35.91	36.659	36.859	38.138	38.223	36.867	35.488
	34.746	34.977	36.187	35.95	36.672	36.89	38.106	38.212	36.837	35.501
	34.828	34.972	36.176	35.986	36.689	36.893	38.079	38.211	36.823	35.535
	34.864	34.972	36.164	36.003	36.693	36.905	38.078	38.205	36.829	35.517
	34.905	34.976	36.157	36.008	36.655	36.916	38.076	38.188	36.87	35.538
	34.918	35.015	36.146	35.996	36.635	36.935	38.062	38.2	36.902	35.6
	34.935	35.047	36.141	36.02	36.613	36.978	38.058	38.2	36.916	35.565
	34.946	35.155	36.131	36.031	36.569	36.969	38.042	38.21	36.93	35.48
	34.95	35.192	36.126	36.045	36.546	36.944	38.033	38.216	36.944	35.642
	34.942	34.892	36.119	36.057	36.533	36.92	38.021	38.216	36.945	35.708
	34.935	35.001	36.104	36.033	36.499	36.925	38.027	38.205	36.946	35.665
	34.918	34.626	36.081	36.016	36.484	36.903	38.033	38.206	36.94	35.576
	34.918	34.477	36.075	36	36.455	36.894	38.039	38.215	36.945	35.452
	34.904	34.933	36.079	35.981	36.471	36.868	38.056	38.222	36.951	35.341
	34.849	34.96	36.078	35.954	36.537	36.857	38.057	38.223	36.959	35.236
	34.82	34.875	36.074	35.922	36.578	36.851	38.06	38.222	36.973	35.186
	34.801	34.809	36.07	35.902	36.581	36.847	38.072	38.229	36.977	35.132
	34.791	34.667	36.06	35.883	36.569	36.864	38.073	38.223	36.983	35.085
	34.774	34.575	36.05	35.865	36.565	36.866	38.064	38.213	37.009	35.09
	34.767	34.487	36.03	35.833	36.54	36.861	38.057	38.208	36.993	35.116
	34.765	34.421	35.992	35.8	36.513	36.856	38.045	38.203	36.985	35.14
	34.748	34.517	35.969	35.775	36.497	36.855	38.037	38.2	36.941	35.222
	34.732	34.613	35.954	35.746	36.486	36.86	38.026	38.192	36.972	35.275
	34.733	34.698	35.944	35.783	36.473	36.872	38.006	38.186	36.993	35.254
	34.731	34.713	35.938	35.811	36.471	36.885	38.001	38.178	36.985	35.209
	34.724	34.707	35.927	35.826	36.475	36.892	37.991	38.159	36.906	35.219
	34.732	34.654	35.911	35.855	36.483	36.901	37.997	38.139	36.844	35.223
	34.718	34.592	35.909	35.854	36.499	36.92	37.992	38.125	36.769	35.256
	34.75	34.597	35.903	35.871	36.518	36.94	37.99	38.106	36.756	35.228
	34.72	34.618	35.894	35.875	36.614	36.949	38.017	38.092	36.781	35.225
	34.686	34.591	35.877	35.876	36.74	36.966	38.036	38.106	36.799	35.267
	34.676	34.577	35.863	35.876	36.847	36.982	38.042	38.104	36.763	35.28
	34.66	34.595	35.842	35.866	36.929	36.996	38.05	38.067	36.731	35.283
	34.648	34.586	35.83	35.858	36.999	37.029	38.051	38.091	36.72	35.244
	34.638	34.59	35.817	35.836	37.047	37.024	38.05	38.045	36.719	35.208
	34.63	34.615	35.807	35.853	37.083	37.042	38.081	37.969	36.731	35.202
	34.62	34.594	35.792	35.853	37.093	37.055	38.08	37.843	36.707	35.173
	34.634	34.731	35.78	35.851	37.055	37.074	38.072	37.762	36.695	35.184
	34.573	34.777	35.775	35.85	37.047	37.073	38.063	37.755	36.675	35.216
	34.476	34.776	35.779	35.848	37.072	37.068	38.071	37.702	36.653	35.21
	34.382	34.759	35.769	35.842	37.065	37.055	38.05	37.683	36.632	35.192
	34.304	34.732	35.768	35.853	37.043	37.062	38.056	37.658	36.618	35.081
	34.218	34.698	35.779	35.852	36.911	37.081	38.036	37.59	36.6	34.957
	34.144	34.7	35.869	35.829	36.782	37.071	38.023	37.552	36.578	34.862
	34.089	34.705	35.915	35.829	36.793	37.08	38.019	37.547	36.585	34.842
	34.018	34.717	35.965	35.82	36.731	37.081	38.014	37.546	36.583	34.902
	33.969	34.71	35.993	35.813	36.705	37.077	37.995	37.543	36.567	35.018
	33.935	34.729	35.986	35.826	36.685	37.082	37.946	37.544	36.581	35.081
	33.913	34.72	35.98	35.814	36.644	37.078	37.894	37.529	36.595	35.106
	33.895	34.733	35.965	35.804	36.611	37.092	37.88	37.506	36.587	35.115
	33.901	34.761	35.94	35.8	36.58	37.107	37.865	37.483	36.578	35.165
	33.923	34.779	35.9	35.79	36.569	37.114	37.847	37.466	36.567	35.164
	33.985	34.782	35.861	35.774	36.552	37.138	37.846	37.454	36.56	35.191
	34.035	34.79	35.843	35.764	36.539	37.142	37.817	37.442	36.565	35.17
	34.124	34.716	35.82	35.76	36.518	37.145	37.789	37.437	36.598	35.196
	34.221	34.636	35.79	35.745	36.546	37.145	37.784	37.434	36.628	35.222
	34.294	34.672	35.763	35.734	36.578	37.143	37.751	37.433	36.656	35.235
	34.348	34.681	35.747	35.703	36.567	37.156	37.731	37.388	36.68	35.316
	34.38	34.642	35.71	35.694	36.537	37.152	37.717	37.372	36.703	35.312
	34.395	34.599	35.686	35.688	36.509	37.147	37.7	37.361	36.719	35.344
	34.399	34.514	35.681	35.739	36.505	37.165	37.698	37.35	36.731	35.396
	34.459	34.529	35.677	35.819	36.51	37.164	37.705	37.344	36.741	35.427
	34.503	34.611	35.662	35.837	36.48	37.175	37.68	37.395	36.75	35.453
	34.443	34.652	35.658	35.806	36.426	37.177	37.684	37.447	36.761	35.45
	34.396	34.693	35.647	35.806	36.359	37.174	37.681	37.491	36.765	35.46
	34.353	34.731	35.644	35.945	36.337	37.161	37.677	37.52	36.769	35.631
	34.321	34.86	35.592	35.906	36.359	37.167	37.673	37.533	36.735	35.63
	34.393	34.904	35.588	35.856	36.405	37.157	37.668	37.547	36.676	35.574
	34.411	34.878	35.587	35.822	36.443	37.155	37.665	37.549	36.626	35.505
	34.432	34.892	35.582	35.807	36.485	37.156	37.688	37.548	36.576	35.473
	34.404	34.92	35.573	35.794	36.518	37.161	37.696	37.548	36.554	35.485
	34.411	34.986	35.571	35.798	36.544	37.167	37.732	37.544	36.552	35.511
	34.404	35.083	35.557	35.792	36.573	37.172	37.761	37.549	36.555	35.557
	34.417	35.15	35.552	35.776	36.537	37.189	37.722	37.557	36.566	35.624
	34.424	35.255	35.55	35.765	36.533	37.195	37.671	37.568	36.573	35.752
	34.445	35.382	35.554	35.767	36.557	37.205	37.657	37.577	36.56	35.871
	34.468	35.482	35.567	35.763	36.585	37.218	37.636	37.582	36.554	35.996
	34.529	35.461	35.578	35.759	36.612	37.216	37.619	37.59	36.556	36.039
	34.494	35.397	35.589	35.753	36.634	37.226	37.591	37.59	36.569	35.916
	34.487	35.317	35.587	35.743	36.566	37.244	37.57	37.584	36.567	35.79
	34.543	35.278	35.584	35.734	36.574	37.237	37.553	37.574	36.537	35.679
	34.65	35.221	35.587	35.729	36.59	37.242	37.537	37.565	36.52	35.626
	34.698	35.112	35.571	35.723	36.625	37.271	37.497	37.549	36.502	35.562
	34.936	35.054	35.544	35.736	36.657	37.272	37.48	37.531	36.479	35.506
	35.23	34.981	35.52	35.738	36.669	37.275	37.452	37.514	36.447	35.539
	35.212	34.832	35.495	35.739	36.681	37.261	37.408	37.496	36.409	35.581
	35.16	34.742	35.411	35.699	36.621	37.233	37.367	37.46	36.302	35.521
	35.123	34.68	35.365	35.693	36.607	37.207	37.336	37.404	36.169	35.364
	35.145	34.63	35.339	35.683	36.605	37.177	37.33	37.381	36.036	35.251
	35.025	34.601	35.306	35.685	36.606	37.146	37.302	37.374	35.893	35.176
	35.025	34.576	35.312	35.684	36.595	37.149	37.28	37.379	35.802	35.112
	34.986	34.577	35.422	35.691	36.584	37.142	37.281	37.373	35.776	35.171
	34.908	34.576	35.447	35.689	36.588	37.145	37.266	37.375	35.757	35.243
	34.814	34.582	35.566	35.708	36.558	37.156	37.271	37.369	35.736	35.278
	34.706	34.591	35.654	35.715	36.577	37.14	37.281	37.366	35.749	35.294
	34.635	34.581	35.646	35.705	36.613	37.157	37.27	37.371	35.765	35.284
	34.528	34.578	35.635	35.709	36.628	37.145	37.269	37.375	35.775	35.209
	34.458	34.658	35.499	35.723	36.625	37.138	37.276	37.371	35.799	35.146
	34.411	34.619	35.414	35.71	36.556	37.126	37.29	37.366	35.837	35.128
	34.355	34.554	35.386	35.712	36.425	37.125	37.299	37.362	35.848	35.139
	34.302	34.502	35.377	35.71	36.302	37.122	37.307	37.356	35.859	35.144
	34.257	34.453	35.352	35.782	36.206	37.134	37.312	37.353	35.893	35.161
	34.274	34.425	35.334	35.839	36.135	37.131	37.307	37.354	35.924	35.189
	34.275	34.398	35.309	35.845	36.069	37.143	37.345	37.35	35.971	35.205
	34.278	34.383	35.289	35.882	36.003	37.145	37.428	37.352	36.004	35.198
	34.411	34.388	35.274	35.925	35.955	37.147	37.458	37.349	36.027	35.196
	34.405	34.383	35.258	35.946	35.93	37.177	37.464	37.351	36.056	35.203
	34.386	34.385	35.241	35.988	35.919	37.199	37.472	37.355	36.077	35.212
	34.456	34.383	35.236	35.996	35.911	37.202	37.406	37.359	36.089	35.213
	34.533	34.393	35.223	36.072	35.916	37.231	37.332	37.358	36.104	35.209
	34.535	34.403	35.203	36.129	35.918	37.262	37.316	37.362	36.118	35.199
	34.573	34.412	35.198	36.187	35.889	37.293	37.249	37.382	36.082	35.22
	34.562	34.417	35.213	36.205	35.946	37.308	37.233	37.402	36.036	35.267
	34.578	34.425	35.221	36.196	36.065	37.331	37.206	37.419	36.052	35.266
	34.539	34.437	35.206	36.212	36.162	37.318	37.203	37.456	36.064	35.263
	34.492	34.447	35.199	36.215	36.229	37.303	37.191	37.467	36.025	35.27
	34.563	34.466	35.195	36.264	36.293	37.282	37.178	37.474	35.999	35.267
	34.552	34.546	35.185	36.263	36.325	37.275	37.174	37.473	35.993	35.259
	34.572	34.606	35.174	36.242	36.351	37.261	37.178	37.475	36.007	35.253
	34.607	34.654	35.15	36.231	36.367	37.258	37.178	37.485	36.033	35.244
	34.716	34.703	35.145	36.215	36.373	37.253	37.178	37.477	36.019	35.235
	34.753	34.716	35.142	36.217	36.391	37.252	37.182	37.494	35.994	35.233
	34.806	34.723	35.136	36.269	36.399	37.266	37.187	37.517	36.009	35.228
	34.831	34.73	35.138	36.336	36.412	37.24	37.204	37.531	36.03	35.221
	34.839	34.736	35.144	36.342	36.438	37.255	37.216	37.542	36.058	35.213
	34.829	34.728	35.145	36.321	36.442	37.275	37.234	37.548	36.031	35.21
	34.794	34.725	35.132	36.296	36.484	37.269	37.253	37.562	35.984	35.196
	34.88	34.708	35.14	36.328	36.527	37.273	37.251	37.575	35.953	35.188
	34.887	34.694	35.136	36.347	36.537	37.248	37.267	37.579	35.94	35.183
	34.874	34.669	35.101	36.339	36.522	37.241	37.281	37.603	35.981	35.198
	34.791	34.639	35.206	36.319	36.5	37.253	37.293	37.636	36.04	35.194
	34.734	34.615	35.294	36.317	36.471	37.268	37.296	37.625	36.076	35.158
	34.681	34.595	35.353	36.263	36.409	37.283	37.305	37.612	36.084	35.126
	34.697	34.603	35.418	36.156	36.359	37.287	37.321	37.598	36.094	35.104
	34.661	34.601	35.531	36.173	36.315	37.293	37.327	37.58	36.12	35.094
	34.668	34.602	35.573	36.187	36.27	37.284	37.344	37.581	36.18	35.099
	34.658	34.599	35.577	36.225	36.235	37.286	37.371	37.555	36.228	35.088
	34.687	34.577	35.688	36.303	36.185	37.301	37.366	37.531	36.253	35.078
	34.819	34.565	35.75	36.296	36.181	37.301	37.355	37.55	36.263	35.075
	34.794	34.557	35.688	36.294	36.197	37.286	37.341	37.547	36.268	35.082
	34.945	34.565	35.68	36.308	36.22	37.293	37.349	37.507	36.277	35.238
	34.984	34.556	35.729	36.402	36.163	37.281	37.35	37.479	36.275	35.397
	34.995	34.552	35.713	36.432	36.187	37.288	37.349	37.448	36.28	35.496
	34.989	34.543	35.792	36.308	36.178	37.285	37.354	37.435	36.295	35.568
	34.986	34.54	35.908	36.469	36.175	37.295	37.362	37.386	36.307	35.611
	34.924	34.463	36.008	36.462	36.205	37.291	37.357	37.471	36.309	35.64
	34.929	34.356	36.051	36.416	36.214	37.282	37.388	37.488	36.304	35.635
	34.953	34.304	35.97	36.432	36.237	37.282	37.395	37.501	36.316	35.557
	34.94	34.299	36.114	36.417	36.268	37.269	37.352	37.518	36.342	35.478
	34.808	34.316	36.235	36.424	36.292	37.254	37.261	37.432	36.375	35.419
	34.694	34.339	36.235	36.418	36.322	37.236	37.207	37.391	36.411	35.372
	34.816	34.363	36.223	36.378	36.352	37.22	37.195	37.38	36.435	35.413
	34.86	34.392	36.178	36.395	36.377	37.207	37.18	37.345	36.455	35.456
	34.874	34.41	36.14	36.428	36.4	37.202	37.159	37.278	36.471	35.488
	34.945	34.425	36.119	36.436	36.376	37.183	37.166	37.301	36.488	35.501
	34.882	34.446	36.136	36.455	36.329	37.176	37.163	37.285	36.498	35.513
	34.885	34.49	36.149	36.477	36.268	37.145	37.163	37.225	36.498	35.528
	34.941	34.613	36.099	36.488	36.213	37.138	37.17	37.12	36.496	35.546
	34.967	34.689	36.101	36.54	36.166	37.14	37.171	37.167	36.501	35.591
	35.022	34.752	36.073	36.58	36.119	37.129	37.166	37.215	36.51	35.627
	35.068	34.808	36.085	36.576	36.088	37.111	37.158	37.135	36.52	35.665
	35.077	34.996	36.052	36.567	36.036	37.109	37.158	37.181	36.492	35.698
	35.069	35.142	35.973	36.582	35.995	37.103	37.159	37.116	36.476	35.727
	35.116	35.282	35.833	36.549	35.969	37.101	37.168	37.167	36.446	35.721
	35.066	35.383	35.777	36.565	35.939	37.021	37.175	37.051	36.393	35.636
	35.069	35.374	35.813	36.587	35.889	36.907	37.182	36.942	36.323	35.553
	35.002	35.308	35.815	36.624	35.826	37.111	37.177	36.961	36.261	35.487
	34.985	35.316	35.819	36.652	35.781	37.084	37.185	37.121	36.248	35.44
	35.01	35.307	35.84	36.75	35.747	37.014	37.179	37.213	36.275	35.39
	35.015	35.339	35.832	36.804	35.757	36.938	37.185	37.241	36.298	35.342
	35.073	35.433	35.859	36.83	35.776	36.898	37.19	37.234	36.256	35.304
	35.139	35.387	35.91	36.809	35.802	36.861	37.188	37.283	36.365	35.277
	35.2	35.276	35.958	36.785	35.938	36.826	37.176	37.285	36.419	35.256
	35.208	35.253	36.012	36.771	35.996	36.799	37.183	37.314	36.405	35.238
	35.144	35.274	36.02	36.782	36.022	36.776	37.185	37.331	36.348	35.227
	35.063	35.19	36.037	36.866	36.046	36.758	37.162	37.225	36.255	35.211
	34.986	35.156	36.185	36.86	36.099	36.737	37.172	37.228	36.162	35.204
	34.931	35.12	36.239	36.877	36.114	36.72	37.183	37.296	36.125	35.195
	34.864	35.145	36.149	36.883	36.095	36.702	37.179	37.307	36.18	35.164
	34.813	35.135	36.062	36.871	36.056	36.678	37.17	37.299	36.228	35.135
	34.764	35.146	36.037	36.891	36.02	36.663	37.18	37.274	36.268	35.113
	34.722	35.127	36.069	36.88	35.988	36.661	37.198	37.25	36.314	35.099
	34.695	35.127	36.028	36.856	35.945	36.67	37.206	37.214	36.337	35.093
	34.714	35.221	35.982	36.868	35.839	36.666	37.206	37.175	36.354	35.09
	34.659	35.303	36.109	36.836	35.772	36.658	37.215	37.131	36.367	35.097
	34.586	35.395	36.241	36.843	35.74	36.63	37.237	37.099	36.381	35.101
	34.521	35.441	36.333	36.85	35.684	36.635	37.245	37.113	36.397	35.104
	34.469	35.372	36.354	36.841	35.643	36.611	37.252	37.261	36.414	35.109
	34.406	35.279	36.331	36.823	35.69	36.597	37.262	37.295	36.434	35.096
	34.428	35.295	36.334	36.807	35.666	36.607	37.269	37.384	36.438	35.092
	34.531	35.284	36.384	36.823	35.579	36.616	37.27	37.366	36.442	35.099
	34.653	35.301	36.453	36.828	35.595	36.626	37.262	37.321	36.436	35.11
	34.689	35.342	36.48	36.842	35.538	36.648	37.249	37.275	36.425	35.127
	34.73	35.351	36.508	36.863	35.49	36.659	37.232	37.211	36.418	35.12
	34.871	35.376	36.482	36.854	35.483	36.658	37.202	37.162	36.416	35.111
	34.86	35.506	36.469	36.875	35.448	36.668	37.169	37.124	36.418	35.101
	34.87	35.474	36.459	36.863	35.401	36.676	37.143	37.072	36.418	34.982
	34.944	35.492	36.414	36.792	35.418	36.678	37.156	37.014	36.432	34.844
	34.961	35.451	36.432	36.726	35.43	36.679	37.179	36.974	36.459	34.747
	34.918	35.409	36.473	36.697	35.524	36.698	37.183	36.943	36.484	34.738
	34.863	35.494	36.452	36.685	35.674	36.719	37.177	36.918	36.495	34.761
	34.831	35.631	36.454	36.684	35.696	36.716	37.18	36.898	36.501	34.777
	34.803	35.777	36.401	36.693	35.603	36.728	37.185	36.867	36.514	34.795
	34.758	35.903	36.345	36.656	35.598	36.726	37.204	36.841	36.523	34.811
	34.685	35.906	36.334	36.607	35.572	36.73	37.223	36.811	36.522	34.826
	34.641	35.782	36.449	36.6	35.472	36.729	37.246	36.808	36.504	34.817
	34.622	35.632	36.479	36.564	35.135	36.724	37.288	36.783	36.483	34.771
	34.586	35.49	36.484	36.556	35.314	36.714	37.31	36.754	36.458	34.722
	34.584	35.388	36.401	36.611	35.392	36.703	37.325	36.728	36.448	34.686
	34.638	35.327	36.328	36.685	35.322	36.683	37.29	36.717	36.445	34.674
	34.698	35.306	36.302	36.642	35.334	36.677	37.264	36.698	36.445	34.683
	34.654	35.271	37.465	36.552	35.101	36.659	37.161	36.689	36.446	34.702
	34.631	35.241	36.355	36.646	35.24	36.655	37.016	36.688	36.442	34.724
	34.645	35.233	36.291	36.596	35.195	36.652	36.915	36.673	36.439	34.754
	34.596	35.227	36.307	36.625	35.142	36.645	36.844	36.583	36.441	34.785
	34.771	35.227	36.292	36.676	35.099	36.618	36.812	36.531	36.449	34.778
	35.097	35.233	36.298	36.67	35.057	36.619	36.783	36.506	36.459	34.747
	35.255	35.236	36.278	36.72	35.018	36.606	36.831	36.504	36.477	34.738
	35.32	35.235	36.235	36.735	34.993	36.581	36.903	36.522	36.482	34.748
	35.406	35.25	36.213	36.798	34.966	36.581	36.902	36.538	36.476	34.759
	35.252	35.253	36.194	36.824	34.954	36.591	36.887	36.58	36.468	34.772
	35.022	35.244	36.15	36.816	34.944	36.592	36.832	36.603	36.442	34.774
	34.857	35.227	36.17	36.768	34.938	36.591	36.936	36.614	36.42	34.786
	34.749	35.198	36.243	36.796	34.917	36.581	37.001	36.614	36.402	34.801
	34.726	35.231	36.26	36.728	34.908	36.591	37.021	36.618	36.378	34.81
	34.766	35.294	36.267	36.741	34.905	36.579	36.978	36.62	36.361	34.822
	34.827	35.357	36.2	36.802	34.878	36.586	36.954	36.615	36.365	34.836
	34.843	35.392	36.114	36.814	34.472	36.578	36.878	36.616	36.374	34.864
	34.828	35.397	36.069	36.815	35.182	36.558	36.911	36.61	36.381	34.875
	34.667	35.379	36.037	36.85	34.873	36.511	37.019	36.602	36.387	34.843
	34.51	35.355	36.002	36.935	34.877	36.47	36.967	36.6	36.382	34.865
	34.402	35.312	35.975	37.039	34.905	36.45	36.929	36.585	36.379	34.872
	34.293	35.269	35.957	37.068	34.852	36.409	36.934	36.581	36.372	34.863
	34.22	35.209	35.944	37.067	34.946	36.385	36.919	36.572	36.364	34.857
	34.198	35.15	35.917	37.031	35.211	36.367	36.915	36.57	36.362	34.861
	34.142	35.101	35.902	37.009	35.259	36.355	36.872	36.558	36.357	34.87
	34.131	35.077	35.891	36.909	35.889	36.338	36.873	36.551	36.356	34.872
	34.12	35.062	35.867	36.855	35.628	36.338	36.867	36.538	36.352	34.876
	34.06	35.05	35.845	36.76	35.735	36.319	36.85	36.517	36.353	34.903
	33.98	35.036	35.83	36.677	36.406	36.327	36.848	36.478	36.353	34.922
	34.016	35.025	35.802	36.619	36.001	36.341	36.866	36.479	36.362	34.893
	34.201	35.004	35.79	36.621	34.7	36.371	36.849	36.493	36.375	34.872
	34.336	34.988	35.77	36.677	34.605	36.409	36.8	36.509	36.353	34.854
	34.392	34.97	35.744	36.62	35.444	36.388	36.831	36.546	36.337	34.822
	34.356	34.941	35.736	36.574	35.77	36.38	36.853	36.529	36.335	34.808
	34.441	34.88	35.715	36.535	35.595	36.354	36.899	36.5	36.332	34.804
	34.456	34.811	35.711	36.512	35.632	36.351	36.907	36.47	36.342	34.799
	34.467	34.749	35.682	36.493	35.474	36.372	36.916	36.486	36.357	34.787
	34.508	34.709	35.667	36.475	35.36	36.361	36.945	36.518	36.366	34.789
	34.475	34.673	35.695	36.47	35.147	36.325	36.933	36.542	36.366	34.774
	34.541	34.65	35.727	36.459	34.8	36.309	36.917	36.549	36.368	34.722
	34.637	34.635	35.812	36.438	34.586	36.292	36.91	36.551	36.366	34.692
	34.683	34.618	36.025	36.421	34.639	36.26	36.905	36.556	36.35	34.674
	34.635	34.607	36.098	36.406	34.73	36.208	36.875	36.557	36.322	34.665
	34.578	34.592	36.025	36.389	34.806	36.158	36.858	36.564	36.302	34.688
	34.653	34.586	35.917	36.384	35.426	36.121	36.806	36.579	36.292	34.752
	34.723	34.606	35.827	36.362	35.746	36.095	36.791	36.588	36.234	34.821
	34.757	34.623	35.813	36.348	35.963	36.089	36.804	36.594	36.136	34.862
	34.752	34.63	35.831	36.351	35.919	36.079	36.813	36.589	36.095	34.813
	34.734	34.633	35.82	36.382	36.028	36.057	36.832	36.598	36.089	34.761
	34.716	34.643	35.956	36.426	35.9	36.079	36.85	36.606	36.035	34.724
	34.704	34.645	36.062	36.448	35.401	36.072	36.871	36.591	35.918	34.754
	34.662	34.646	36.118	36.447	35.405	36.068	36.876	36.592	35.785	34.773
	34.589	34.654	36.064	36.435	35.427	36.079	36.88	36.612	35.642	34.761
	34.487	34.664	35.959	36.408	35.43	36.084	36.842	36.626	35.526	34.649
	34.426	34.671	35.891	36.407	35.413	36.089	36.818	36.623	35.476	34.562
	34.332	34.679	35.832	36.404	35.396	36.106	36.769	36.634	35.416	34.479
	34.284	34.684	35.768	36.393	35.369	36.1	36.728	36.648	35.38	34.395
	34.235	34.674	35.721	36.382	35.324	36.109	36.691	36.64	35.392	34.339
	34.228	34.638	35.711	36.389	35.473	36.116	36.643	36.646	35.421	34.373
	34.193	34.61	35.692	36.382	35.377	36.115	36.604	36.644	35.414	34.405
	34.162	34.584	35.662	36.357	35.42	36.1	36.526	36.647	35.533	34.393
	34.122	34.564	35.638	36.323	35.482	36.097	36.516	36.647	35.615	34.391
	34.105	34.548	35.612	36.271	35.424	36.081	36.649	36.644	35.648	34.473
	34.103	34.554	35.584	36.238	35.399	36.076	36.683	36.638	35.644	34.592
	34.102	34.577	35.559	36.184	35.458	36.06	36.715	36.641	35.682	34.61
	34.17	34.602	35.524	36.136	35.483	36.042	36.797	36.634	35.593	34.662
	34.258	34.628	35.502	36.103	35.471	36.027	36.806	36.629	35.548	34.754
	34.278	34.651	35.455	36.058	35.46	36.023	36.747	36.627	35.529	34.702
	34.295	34.674	35.476	36.006	35.398	36.016	36.671	36.626	35.474	34.699
	34.319	34.709	35.475	35.954	35.451	36.021	36.683	36.623	35.416	34.697
	34.324	34.71	35.47	35.907	35.507	36.009	36.735	36.627	35.368	34.636
	34.331	34.709	35.456	35.857	35.558	36.005	36.715	36.629	35.387	34.593
	34.336	34.712	35.446	35.802	35.578	36.002	36.691	36.639	35.465	34.585
	34.338	34.715	35.426	35.763	35.565	35.985	36.641	36.645	35.54	34.566
	34.317	34.729	35.407	35.738	35.552	35.985	36.592	36.653	35.594	34.541
	34.296	34.742	35.39	35.786	35.57	35.983	36.554	36.666	35.647	34.508
	34.287	34.75	35.352	35.817	35.528	35.974	36.532	36.672	35.616	34.531
	34.312	34.754	35.318	35.857	35.522	35.976	36.518	36.674	35.56	34.527
	34.342	34.773	35.285	35.865	35.7	35.957	36.5	36.674	35.502	34.577
	34.359	34.915	35.238	35.884	35.687	35.963	36.488	36.67	35.421	34.571
	34.349	34.968	35.235	35.887	35.652	35.964	36.478	36.666	35.394	34.73
	34.32	34.974	35.254	35.9	35.596	35.971	36.439	36.653	35.333	34.85
	34.301	34.94	35.243	35.905	35.516	35.97	36.423	36.645	35.166	34.861
	34.288	34.894	35.258	35.913	35.45	35.954	36.385	36.654	35.108	34.783
	34.262	34.9	35.293	35.903	35.41	35.944	36.344	36.664	35.065	34.707
	34.21	34.774	35.289	35.92	35.352	35.915	36.324	36.657	35.12	34.771
	34.243	34.603	35.307	35.918	35.279	35.914	36.302	36.655	35.118	34.809
	34.326	34.48	35.372	35.992	35.219	35.946	36.28	36.65	35.043	34.806
	34.402	34.403	35.403	36.03	35.215	35.9	36.27	36.638	34.989	34.877
	34.446	34.401	35.427	36.035	35.222	35.836	36.26	36.634	34.965	34.808
	34.468	34.411	35.431	36.037	35.207	35.799	36.247	36.63	34.963	34.725
	34.468	34.423	35.438	36.036	35.15	35.761	36.237	36.636	34.946	34.717
	34.479	34.435	35.437	36.019	35.133	35.732	36.226	36.637	34.894	34.701
	34.449	34.446	35.431	36.011	35.052	35.715	36.219	36.634	34.933	34.726
	34.452	34.473	35.393	36.007	35.073	35.71	36.216	36.615	34.962	34.74
	34.482	34.494	35.381	36.004	35.134	35.699	36.207	36.619	34.936	34.738
	34.492	34.488	35.368	36.001	35.049	35.691	36.197	36.626	34.924	34.692
	34.477	34.465	35.366	35.985	34.984	35.679	36.184	36.625	34.894	34.664
	34.488	34.607	35.337	35.989	34.983	35.674	36.177	36.628	34.832	34.71
	34.429	34.689	35.309	35.995	35.036	35.683	36.153	36.628	34.826	34.768
	34.479	34.726	35.286	35.994	35.019	35.67	36.145	36.632	34.91	34.767
	34.54	34.756	35.273	35.992	34.984	35.667	36.128	36.642	34.881	34.747
	34.548	34.794	35.284	35.985	35.093	35.666	36.104	36.631	34.847	34.719
	34.64	34.812	35.282	35.981	35.198	35.668	36.081	36.628	34.824	34.71
	34.727	34.831	35.282	35.993	35.246	35.662	36.066	36.616	34.797	34.7
	34.76	34.854	35.276	35.999	35.422	35.659	36.054	36.635	34.814	34.671
	34.777	34.869	35.273	36.012	35.543	35.663	36.047	36.662	34.823	34.671
	34.783	34.888	35.295	36.004	35.533	35.659	36.06	36.68	34.846	34.706
	34.782	34.895	35.343	36.014	35.465	35.681	36.103	36.694	34.858	34.71
	34.773	34.922	35.36	36.021	35.341	35.681	36.052	36.703	34.849	34.768
	34.774	34.925	35.396	36.012	35.232	35.673	36.019	36.71	34.84	34.852
	34.758	34.878	35.443	36.032	35.16	35.666	36.022	36.714	34.876	34.911
	34.741	34.809	35.469	36.034	35.089	35.659	36.041	36.709	34.889	34.979
	34.727	34.753	35.486	36.056	34.999	35.663	36.051	36.704	34.884	35.038
	34.707	34.719	35.498	36.057	34.933	35.665	36.064	36.701	34.847	35.027
	34.699	34.7	35.501	36.08	34.982	35.65	36.088	36.695	34.863	35.025
	34.694	34.677	35.485	36.086	34.906	35.642	36.112	36.687	34.904	35.061
	34.66	34.648	35.461	36.073	34.841	35.637	36.084	36.687	34.954	35.097
	34.64	34.611	35.411	36.093	34.798	35.617	36.071	36.699	34.96	35.182
	34.6	34.585	35.409	36.099	34.77	35.636	36.066	36.697	35.102	35.213
	34.582	34.571	35.402	36.096	34.725	35.675	36.066	36.703	35.096	35.232
	34.537	34.543	35.396	36.088	34.702	35.702	36.067	36.704	35.086	35.196
	34.515	34.508	35.353	36.083	34.826	35.71	36.068	36.704	35.091	35.194
	34.498	34.476	35.332	36.078	34.904	35.745	36.028	36.702	35.078	35.204
	34.505	34.445	35.331	36.096	34.94	35.739	36.064	36.708	35.095	35.244
	34.494	34.423	35.329	36.101	34.945	35.735	36.081	36.713	35.111	35.27
	34.501	34.404	35.324	36.098	34.949	35.742	36.089	36.718	35.206	35.279
	34.514	34.394	35.317	36.109	34.965	35.753	36.114	36.712	35.32	35.256
	34.518	34.383	35.307	36.116	34.984	35.697	36.136	36.684	35.298	35.247
	34.517	34.374	35.301	36.11	34.962	35.663	36.146	36.664	35.265	35.232
	34.532	34.369	35.32	36.109	34.918	35.635	36.148	36.669	35.24	35.169
	34.523	34.376	35.387	36.11	34.887	35.613	36.151	36.699	35.191	35.129
	34.59	34.379	35.477	36.109	34.859	35.587	36.163	36.762	35.084	35.166
	34.519	34.382	35.799	36.088	34.832	35.585	36.172	36.767	35.009	35.197
	34.477	34.375	35.844	36.069	34.814	35.556	36.174	36.873	34.985	35.255
	34.493	34.401	35.896	36.078	34.815	35.53	36.171	36.983	34.977	35.258
	34.498	34.445	35.916	36.069	34.822	35.507	36.157	37.007	35.197	35.303
	34.512	34.479	35.834	36.057	34.834	35.467	36.165	36.976	35.324	35.404
	34.534	34.505	35.806	36.041	34.829	35.438	36.182	36.934	35.215	35.451
	34.519	34.529	35.815	36.029	34.843	35.417	36.174	36.849	35.128	35.332
	34.51	34.568	35.941	36.014	34.865	35.398	36.177	36.784	35.127	35.207
	34.476	34.575	35.986	36.005	34.903	35.383	36.173	36.808	35.066	35.125
	34.439	34.546	35.971	36.003	34.942	35.378	36.15	36.88	34.98	35.078
	34.433	34.518	35.94	35.99	34.981	35.378	36.152	36.894	34.963	35.045
	34.431	34.5	35.969	35.984	35.01	35.379	36.153	36.818	34.9	35.053
	34.444	34.491	35.839	35.982	35.042	35.399	36.158	36.717	34.821	35.031
	34.494	34.491	35.718	35.983	35.056	35.406	36.159	36.676	34.784	34.989
	34.499	34.494	35.809	36	35.042	35.413	36.15	36.647	34.731	34.947
	34.445	34.535	35.866	36.001	35.043	35.452	36.131	36.627	34.677	34.923
	34.385	34.532	35.93	36.001	35.067	35.486	36.121	36.657	34.706	34.868
	34.328	34.524	35.951	35.997	35.033	35.459	36.116	36.677	34.727	34.858
	34.288	34.532	35.938	35.984	34.981	35.448	36.115	36.715	34.857	34.843
	34.231	34.705	35.945	35.997	34.966	35.505	36.105	36.733	34.938	34.873
	34.201	34.761	35.926	36.004	34.962	35.552	36.103	36.747	34.994	34.843
	34.176	34.777	35.796	35.982	34.969	35.552	36.113	36.764	35.049	34.811
	34.159	34.789	35.742	36.036	34.961	35.547	36.138	36.793	35.156	34.765
	34.138	34.838	35.709	36.093	34.946	35.533	36.151	36.737	35.236	34.888
	34.116	34.861	35.716	36.108	34.951	35.511	36.177	36.66	35.331	35.015
	34.205	34.814	35.75	36.107	34.958	35.495	36.183	36.543	35.325	35.155
	34.243	34.762	35.847	36.13	34.956	35.482	36.186	36.488	35.266	35.175
	34.277	34.753	35.812	36.152	34.945	35.494	36.176	36.474	35.246	35.16
	34.312	34.931	35.834	36.18	34.904	35.514	36.171	36.478	35.285	35.247
	34.293	34.875	35.831	36.221	34.858	35.524	36.167	36.462	35.303	35.24
	34.273	34.823	35.812	36.194	34.838	35.541	36.17	36.439	35.385	35.278
	34.232	34.798	35.728	36.183	34.834	35.564	36.171	36.432	35.464	35.35
	34.168	34.74	35.649	36.176	34.838	35.536	36.18	36.424	35.524	35.446
	34.191	34.73	35.682	36.193	34.833	35.51	36.185	36.414	35.569	35.396
	34.279	34.766	35.676	36.174	34.865	35.495	36.208	36.379	35.584	35.425
	34.345	34.784	35.634	36.151	34.904	35.49	36.219	36.359	35.593	35.437
	34.364	34.826	35.626	36.137	34.983	35.485	36.224	36.352	35.6	35.346
	34.404	34.808	35.569	36.156	35.111	35.491	36.232	36.316	35.614	35.278
	34.431	34.844	35.554	36.16	35.194	35.503	36.232	36.294	35.625	35.258
	34.502	34.846	35.579	36.154	35.263	35.51	36.23	36.28	35.636	35.247
	34.533	34.863	35.565	36.138	35.31	35.541	36.204	36.275	35.636	35.203
	34.552	34.822	35.561	36.133	35.318	35.563	36.2	36.283	35.636	35.163
	34.698	34.863	35.544	36.109	35.289	35.602	36.191	36.302	35.64	35.213
	34.701	34.84	35.509	36.087	35.312	35.604	36.187	36.301	35.571	35.321
	34.693	34.785	35.515	36.06	35.392	35.589	36.19	36.381	35.505	35.375
	34.68	34.753	35.496	36.053	35.422	35.58	36.187	36.581	35.458	35.4
	34.653	34.738	35.498	36.062	35.447	35.56	36.19	36.565	35.426	35.383
	34.62	34.723	35.523	36.06	35.473	35.545	36.199	36.513	35.363	35.326
	34.688	34.693	35.562	36.064	35.478	35.541	36.205	36.449	35.299	35.303
	34.696	34.758	35.576	36.064	35.461	35.541	36.215	36.456	35.256	35.279
	34.658	34.769	35.57	36.059	35.42	35.54	36.222	36.469	35.227	35.296
	34.661	34.77	35.552	36.062	35.389	35.532	36.227	36.479	35.212	35.359
	34.73	34.798	35.523	36.057	35.377	35.522	36.23	36.448	35.205	35.325
	34.952	34.848	35.587	36.083	35.358	35.525	36.236	36.434	35.198	35.27
	35.058	34.993	35.583	36.086	35.315	35.531	36.228	36.575	35.187	35.228
	35.022	35.017	35.609	36.107	35.259	35.552	36.227	36.621	35.182	35.17
	34.993	35.014	35.716	36.109	35.215	35.564	36.234	36.623	35.179	35.162
	35.035	35.035	35.892	36.103	35.193	35.587	36.311	36.616	35.196	35.209
	35.093	35.027	36.093	36.095	35.201	35.611	36.292	36.602	35.213	35.206
	35.074	35.068	36.164	36.09	35.213	35.64	36.262	36.602	35.22	35.139
	35.028	35.033	36.203	36.077	35.236	35.636	36.297	36.591	35.217	35.107
	35.018	35.004	36.229	36.103	35.263	35.642	36.295	36.584	35.213	35.034
	35.118	35.006	36.273	36.118	35.311	35.634	36.308	36.582	35.195	34.911
	35.413	35.038	36.308	36.101	35.347	35.634	36.357	36.551	35.166	34.832
	35.468	35.047	36.359	36.1	35.358	35.649	36.361	36.532	35.138	34.806
	35.429	35.034	36.415	36.097	35.337	35.659	36.33	36.512	35.111	34.847
	35.384	34.992	36.456	36.088	35.312	35.647	36.321	36.509	35.079	34.847
	35.228	34.913	36.418	36.082	35.326	35.626	36.319	36.479	35.063	34.785
	35.089	34.836	36.412	36.08	35.385	35.6	36.301	36.458	35.075	34.77
	34.981	34.775	36.446	36.079	35.436	35.587	36.288	36.447	35.073	34.943
	34.941	34.713	36.364	36.084	35.493	35.581	36.311	36.436	35.075	35.143
	34.992	34.646	36.489	36.045	35.427	35.576	36.334	36.428	35.085	35.408
	35.216	34.702	36.516	35.988	35.449	35.564	36.355	36.422	35.091	35.651
	35.453	34.811	36.527	36.14	35.462	35.549	36.363	36.41	35.086	35.748
	35.412	34.832	36.54	36.258	35.447	35.561	36.361	36.407	35.067	35.698
	35.258	34.935	36.546	36.202	35.391	35.576	36.436	36.416	35.054	35.559
	35.111	34.944	36.457	36.18	35.354	35.579	36.52	36.413	35.034	35.442
	34.999	34.976	36.49	36.198	35.309	35.584	36.533	36.431	35.02	35.329
	34.918	34.947	36.511	36.158	35.215	35.584	36.508	36.45	35.007	35.228
	34.89	34.943	36.566	36.212	35.18	35.594	36.561	36.462	34.993	35.01
	34.82	34.966	36.545	36.198	35.2	35.609	36.616	36.47	34.984	34.997
	34.748	34.946	36.555	36.201	35.152	35.609	36.674	36.478	34.972	34.926
	34.722	34.941	36.622	36.247	35.125	35.624	36.662	36.465	34.959	34.888
	34.51	34.987	36.642	36.29	35.089	35.633	36.691	36.468	34.951	34.884
	34.481	35.023	36.622	36.267	35.03	35.646	36.76	36.458	34.944	34.832
	34.449	35.034	36.562	36.27	34.987	35.65	36.726	36.451	34.937	34.78
	34.411	35.071	36.513	36.293	34.955	35.709	36.644	36.429	34.93	34.725
	34.367	35.118	36.602	36.294	34.967	35.64	36.555	36.43	34.933	34.679
	34.31	35.077	36.568	36.323	34.902	35.55	36.505	36.43	34.951	34.647
	34.256	35.029	36.608	36.351	34.893	35.477	36.437	36.432	34.954	34.623
	34.203	35.091	36.589	36.318	34.887	35.426	36.411	36.439	34.957	34.617
	34.146	35.269	36.477	36.264	34.882	35.394	36.354	36.417	34.961	34.601
	34.113	35.387	36.442	36.217	34.864	35.359	36.351	36.417	34.958	34.584
	34.104	35.462	36.394	36.198	34.863	35.355	36.34	36.419	34.95	34.562
	34.087	35.431	36.356	36.244	34.899	35.363	36.305	36.415	34.943	34.545
	34.09	35.367	36.362	36.181	34.875	35.351	36.266	36.412	34.943	34.523
	34.063	35.29	36.375	36.207	34.8	35.342	36.235	36.414	34.939	34.502
	34.042	35.197	36.364	36.175	34.752	35.343	36.24	36.413	34.918	34.502
	34.045	35.147	36.297	36.146	34.731	35.346	36.392	36.417	34.9	34.5
	34.066	35.127	36.313	36.089	34.695	35.348	36.567	36.413	34.878	34.495
	34.095	35.117	36.242	36.047	34.639	35.346	36.612	36.414	34.863	34.522
	34.107	35.063	36.111	36.004	34.667	35.361	36.634	36.418	34.869	34.54
	34.103	34.981	36.027	35.974	34.702	35.38	36.633	36.421	34.941	34.555
	34.104	34.858	35.988	35.956	34.687	35.391	36.57	36.42	34.957	34.555
	34.115	34.739	35.96	35.932	34.722	35.389	36.514	36.415	34.933	34.555
	34.099	34.756	36.014	35.899	34.822	35.372	36.462	36.403	34.917	34.559
	34.095	34.826	35.955	35.873	34.878	35.351	36.418	36.386	34.99	34.555
	34.033	34.83	35.912	35.848	34.843	35.341	36.399	36.37	34.91	34.546
	33.967	34.845	35.893	35.824	34.805	35.336	36.401	36.323	34.814	34.537
	33.927	34.866	35.888	35.803	34.664	35.356	36.556	36.309	34.717	34.532
	33.899	34.917	35.994	35.789	34.597	35.358	36.541	36.295	34.721	34.534
	34.181	34.932	36.116	35.807	34.644	35.347	36.579	36.292	34.744	34.533
	34.358	34.952	36.156	35.81	34.728	35.347	36.542	36.294	34.732	34.524
	34.512	34.918	36.045	35.798	34.688	35.346	36.451	36.264	34.839	34.519
	34.624	34.847	35.964	35.784	34.742	35.349	36.397	36.245	34.969	34.522
	34.691	34.794	35.93	35.789	34.843	35.362	36.347	36.238	34.955	34.528
	34.724	34.811	35.909	35.8	34.962	35.404	36.371	36.24	34.984	34.462
	34.757	34.832	35.893	35.753	34.909	35.403	36.406	36.242	34.975	34.386
	34.804	34.798	35.803	35.762	35.063	35.437	36.406	36.245	34.97	34.329
	34.848	34.82	35.747	35.757	34.985	35.478	36.401	36.241	34.871	34.225
	34.84	34.823	35.714	35.75	34.91	35.52	36.413	36.243	34.774	34.151
	34.82	34.733	35.698	35.755	34.884	35.558	36.427	36.266	34.649	34.105
	34.807	34.642	35.654	35.767	34.793	35.606	36.439	36.28	34.586	34.084
	34.799	34.583	35.668	35.798	34.715	35.569	36.438	36.287	34.553	34.071
	34.789	34.527	35.671	35.801	34.705	35.56	36.424	36.287	34.489	34.056
	34.948	34.493	35.646	35.79	34.638	35.596	36.423	36.286	34.42	34.062
	35.024	34.471	35.629	35.799	34.584	35.622	36.409	36.271	34.413	34.071
	34.96	34.455	35.605	35.797	34.677	35.628	36.399	36.295	34.308	34.129
	34.919	34.438	35.575	35.803	34.64	35.622	36.386	36.316	34.235	34.129
	34.858	34.421	35.54	35.798	34.638	35.607	36.363	36.332	34.331	34.115
	34.815	34.388	35.516	35.789	34.627	35.592	36.345	36.369	34.344	34.11
	34.789	34.375	35.493	35.79	34.612	35.588	36.314	36.393	34.332	34.111
	34.76	34.352	35.481	35.769	34.596	35.578	36.327	36.493	34.338	34.111
	34.74	34.336	35.423	35.752	34.538	35.563	36.28	36.504	34.335	34.116
	34.719	34.331	35.379	35.749	34.661	35.564	36.278	36.484	34.467	34.124
	34.702	34.351	35.379	35.745	34.755	35.554	36.287	36.448	34.515	34.149
	34.677	34.471	35.371	35.721	34.848	35.555	36.274	36.425	34.507	34.161
	34.615	34.46	35.361	35.739	34.811	35.557	36.282	36.409	34.497	34.134
	34.547	34.416	35.35	35.767	34.778	35.558	36.266	36.391	34.515	34.108
	34.574	34.378	35.339	35.78	34.759	35.569	36.253	36.385	34.523	34.1
	34.648	34.353	35.321	35.788	34.732	35.58	36.253	36.399	34.573	34.09
	34.61	34.337	35.332	35.787	34.73	35.595	36.247	36.395	34.582	34.078
	34.619	34.323	35.337	35.788	34.716	35.599	36.24	36.388	34.58	34.058
	34.459	34.319	35.332	35.795	34.706	35.601	36.241	36.383	34.589	34.043
	34.295	34.324	35.325	35.789	34.694	35.602	36.234	36.38	34.597	34.035
	34.179	34.326	35.316	35.805	34.703	35.611	36.21	36.377	34.613	34.043
	34.087	34.31	35.294	35.817	34.703	35.613	36.197	36.379	34.601	34.063
	33.998	34.295	35.312	35.815	34.707	35.609	36.187	36.373	34.715	34.022
	33.942	34.29	35.31	35.81	34.727	35.61	36.187	36.375	34.866	33.969
	33.904	34.271	35.306	35.814	34.756	35.607	36.18	36.345	34.961	33.94
	33.815	34.254	35.303	35.808	34.774	35.607	36.168	36.32	34.997	33.933
	33.769	34.247	35.312	35.808	34.78	35.593	36.16	36.284	34.985	33.943
	33.715	34.234	35.282	35.8	34.775	35.606	36.165	36.367	34.971	33.957
	33.663	34.29	35.275	35.791	34.778	35.611	36.173	36.41	34.992	33.972
	33.63	34.31	35.264	35.854	34.79	35.615	36.193	36.393	34.985	33.981
	33.642	34.301	35.214	35.948	34.786	35.611	36.179	36.465	35.014	33.99
	33.805	34.29	35.176	35.973	34.785	35.608	36.171	36.52	34.97	33.998
	33.746	34.294	35.155	35.976	34.761	35.608	36.179	36.553	34.894	34.031
	33.7	34.302	35.149	36.064	34.731	35.607	36.182	36.58	34.789	34.173
	33.728	34.309	35.149	36.07	34.765	35.613	36.181	36.594	34.706	34.187
	33.764	34.311	35.122	36.04	34.745	35.606	36.17	36.746	34.681	34.158
	33.892	34.307	35.105	36.057	34.769	35.613	36.144	36.704	34.686	34.147
	33.988	34.472	35.072	36.039	34.79	35.648	36.137	36.644	34.65	34.14
	34.06	34.454	35.033	36.097	34.8	35.667	36.137	36.671	34.642	34.14
	34.139	34.394	35.019	36.112	34.802	35.692	36.136	36.678	34.722	34.15
	34.308	34.35	35.057	36.118	34.803	35.729	36.142	36.65	34.784	34.182
	34.347	34.328	35.073	36.196	34.877	35.735	36.15	36.654	34.826	34.2
	34.236	34.324	35.083	36.179	34.701	35.742	36.144	36.626	34.867	34.202
	34.114	34.332	35.074	36.148	34.675	35.732	36.149	36.611	35.007	34.194
	33.985	34.364	35.072	36.139	34.756	35.718	36.156	36.663	35.1	34.188
	33.945	34.369	35.059	36.208	33.733	35.705	36.155	36.762	34.98	34.182
	33.871	34.355	35.066	36.3	34.175	35.704	36.153	36.732	34.88	34.145
	33.963	34.349	35.035	36.334	34.117	35.71	36.139	36.665	34.791	34.078
	33.927	34.358	35.041	36.355	34.21	35.706	36.13	36.681	34.708	34.237
	33.957	34.374	35.05	36.382		35.7	36.131	36.748	34.617	34.421
	33.955	34.418	35.086	36.394		35.692	36.114	36.769	34.547	34.565
	34.106	34.438	35.039	36.372		35.689	36.09	36.727	34.484	34.67
	34.215	34.424	34.979	36.365		35.698	36.027	36.702	34.435	34.638
	34.231	34.412	34.935	36.411		35.716	35.989	36.632	34.398	34.529
	34.265	34.408	34.892	36.37		35.727	35.986	36.622	34.355	34.41
	34.28	34.402	34.873	36.29	35.681	35.734	35.991	36.738	34.355	34.304
	34.193	34.461	34.845	36.312		35.751	36.002	36.724	34.337	34.215
	34.201	34.474	34.843	36.358		35.774	35.991	36.788	34.34	34.17
	34.275	34.476	34.816	36.415		35.797	35.984	36.737	34.375	34.386
	34.351	34.481	34.805	36.43		35.806	35.982	36.711	34.403	34.498
	34.369	34.492	34.798	36.433		35.827	35.979	36.648	34.426	34.408
	34.328	34.504	34.792	36.407	34.87	35.845	35.972	36.638	34.446	34.331
	34.38	34.516	34.788	36.395	34.893	35.823	35.96	36.697	34.457	34.274
	34.309	34.523	34.771	36.42	34.888	35.805	35.95	36.759	34.477	34.218
	34.306	34.538	34.756	36.384	34.885	35.799	35.948	36.756	34.511	34.179
	34.36	34.548	34.746	36.377	34.865	35.796	35.937	36.786	34.517	34.161
	34.475	34.562	34.725	36.422	34.847	35.786	35.923	36.759	34.505	34.16
	34.41	34.569	34.715	36.441	34.785	35.733	35.909	36.676	34.496	34.137
	34.339	34.581	34.704	36.457	34.761	35.707	35.908	36.69	34.488	34.119
	34.248	34.559	34.688	36.438	34.686	35.691	35.889	36.772	34.481	34.089
	34.317	34.518	34.672	36.439	34.749	35.684	35.88	36.813	34.474	34.076
	34.506	34.467	34.661	36.44	34.746	35.673	35.858	36.799	34.475	34.061
	34.707	34.426	34.636	36.409	34.737	35.676	35.829	36.687	34.495	34.043
	34.801	34.401	34.618	36.41	34.72	35.678	35.812	36.751	34.509	34.026
	34.878	34.389	34.598	36.397	34.714	35.683	35.802	36.73	34.485	34.018
	34.86	34.371	34.589	36.381	34.731	35.696	35.796	36.702	34.498	34.015
	34.885	34.364	34.598	36.365	34.744	35.706	35.793	36.684	34.471	34.008
	34.952	34.365	34.582	36.342	34.769	35.694	35.806	36.676	34.431	34.007
	35.021	34.37	34.558	36.362	34.79	35.707	35.805	36.644	34.477	34.011
	35.074	34.404	34.565	36.345	34.726	35.735	35.8	36.626	34.524	34.023
	35.107	34.41	34.579	36.347	34.8	35.773	35.806	36.617	34.578	34.034
	35.146	34.437	34.593	36.324	34.862	35.788	35.805	36.621	34.672	34.032
	35.238	34.475	34.593	36.395	34.891	35.805	35.808	36.635	34.639	34.028
	35.138	34.5	34.595	36.396	34.916	35.82	35.809	36.661	34.731	34.033
	35.015	34.526	34.594	36.399	34.922	35.847	35.8	36.877	34.856	34.041
	35.072	34.561	34.597	36.351	34.916	35.867	35.8	36.917	34.839	34.191
	35.18	34.568	34.611	36.274	34.906	35.873	35.789	36.981	34.779	34.165
	35.238	34.571	34.64	36.22	34.915	35.846	35.776	36.932	34.779	34.12
	35.204	34.571	34.67	36.233	34.897	35.806	35.766	36.864	34.803	34.07
	35.242	34.573	34.697	36.246	34.884	35.786	35.757	36.823	34.704	34.056
	35.394	34.572	34.691	36.227	34.897	35.763	35.756	36.783	34.636	34.016
	35.504	34.574	34.711	36.191	34.9	35.749	35.746	36.765	34.623	33.983
	35.54	34.582	34.719	36.251	34.892	35.737	35.746	36.879	34.663	33.931
	35.441	34.589	34.735	36.29	34.852	35.744	35.744	36.873	34.684	33.915
	35.294	34.578	34.746	36.317	34.827	35.746	35.749	36.854	34.667	33.908
	35.169	34.566	34.752	36.355	34.828	35.741	35.755	36.905	34.664	33.929
	35.062	34.559	34.751	36.357	34.815	35.737	35.758	36.927	34.759	33.914
	35.015	34.567	34.744	36.323	34.811	35.721	35.758	36.892	34.754	33.927
	34.981	34.568	34.765	36.265	34.821	35.708	35.762	36.828	34.766	33.921
	34.907	34.549	34.747	36.264	34.804	35.715	35.755	36.869	34.749	33.963
	34.823	34.517	34.753	36.247	34.789	35.735	35.745	36.927	34.639	33.994
	34.783	34.492	34.755	36.269	34.795	35.748	35.755	36.956	34.532	33.957
	34.768	34.474	34.765	36.276	34.797	35.74	35.762	36.931	34.475	33.906
	34.711	34.472	34.819	36.269	34.801	35.746	35.756	36.881	34.49	33.861
	34.643	34.467	34.831	36.3	34.819	35.739	35.751	36.797	34.616	33.863
	34.604	34.463	34.834	36.331	34.823	35.73	35.744	36.742	34.641	33.874
	34.561	34.459	34.828	36.362	34.829	35.716	35.738	36.698	34.644	33.904
	34.524	34.477	34.82	36.422	34.825	35.723	35.737	36.673	34.631	33.936
	34.498	34.488	34.826	36.46	34.82	35.73	35.739	36.64	34.688	33.906
	34.434	34.49	34.816	36.442	34.83	35.739	35.741	36.621	34.658	34.021
	34.411	34.488	34.817	36.465	34.816	35.74	35.731	36.58	34.628	34.086
	34.412	34.488	34.816	36.462	34.815	35.735	35.727	36.555	34.646	34.118
	34.411	34.462	34.806	36.452	34.831	35.738	35.72	36.571	34.679	34.121
	34.428	34.442	34.816	36.515	34.873	35.749	35.69	36.576	34.69	34.081
	34.476	34.439	34.83	36.553	34.895	35.765	35.649	36.714	34.751	34.165
	34.503	34.498	34.869	36.572	34.915	35.787	35.647	36.802	34.689	34.245
	34.502	34.559	34.87	36.538	34.94	35.804	35.669	36.83	34.611	34.234
	34.499	34.586	34.863	36.522	34.954	35.808	35.681	36.864	34.533	34.281
	34.489	34.6	34.866	36.513	34.968	35.811	35.704	36.951	34.505	34.32
	34.484	34.604	34.848	36.504	34.981	35.816	35.716	36.939	34.555	34.339
	34.476	34.591	34.88	36.529	34.964	35.815	35.714	37.009	34.692	34.359
	34.399	34.586	34.987	36.526	34.967	35.838	35.72	37.022	34.731	34.405
	34.415	34.589	35.126	36.526	34.955	35.853	35.729	37.02	34.721	34.484
	34.486	34.595	35.184	36.527	34.969	35.821	35.74	37.032	34.711	34.479
	34.507	34.589	35.174	36.523	35.017	35.793	35.729	37.052	34.8	34.479
	34.491	34.581	35.116	36.631	35.054	35.798	35.717	37.114	34.833	34.47
	34.522	34.576	35.192	36.717	35.048	35.825	35.708	37.124	34.859	34.474
	34.522	34.568	35.272	36.694	35.099	35.839	35.699	37.107	34.902	34.513
	34.532	34.58	35.301	36.641	35.3	35.863	35.713	37.119	34.963	34.52
	34.508	34.6	35.293	36.67	35.355	35.875	35.763	37.093	34.946	34.548
	34.474	34.572	35.226	36.718	35.42	35.879	35.798	37.041	34.981	34.558
	34.473	34.559	35.251	36.759	35.372	35.89	35.825	37.017	35.032	34.62
	34.485	34.546	35.223	36.78	35.33	35.894	35.841	37.007	35.235	34.62
	34.436	34.539	35.215	36.748	35.319	35.897	35.793	37.023	35.475	34.59
	34.446	34.529	35.255	36.725	35.317	35.9	35.756	37.006	35.684	34.508
	34.458	34.519	35.225	36.698	35.451	35.899	35.726	36.962	35.846	34.484
	34.444	34.526	35.194	36.665	35.615	35.888	35.7	37.01	35.978	34.421
	34.443	34.597	35.169	36.614	35.544	35.873	35.686	37.043	36.097	34.363
	34.444	34.664	35.139	36.582	35.618	35.883	35.67	37.023	36.077	34.383
	34.444	34.638	35.105	36.584	36.116	35.896	35.665	37.086	35.849	34.492
	34.434	34.697	35.062	36.55	36.089	35.916	35.665	37.082	35.646	34.533
	34.442	34.617	35.022	36.545	35.087	35.94	35.628	37.094	35.448	34.569
	34.455	34.576	34.995	36.571	35.041	35.964	35.604	37.111	35.339	34.568
	34.474	34.583	34.973	36.658	34.467	35.974	35.607	37.127	35.37	34.579
	34.497	34.62	34.937	36.643	34.545	36	35.666	37.109	35.313	34.609
	34.512	34.665	34.918	36.677	34.675	35.923	35.821	37.047	35.109	34.669
	34.51	34.666	34.899	36.676	34.811	35.988	35.989	36.94	34.938	34.673
	34.528	34.609	34.87	36.677	35.467	35.993	36.097	36.911	34.8	34.692
	34.548	34.632	34.83	36.709	35.459	35.973	36.134	36.955	34.718	34.7
	34.545	34.606	34.852	36.722	35.445	35.968	36.2	37.016	34.648	34.692
	34.564	34.61	34.869	36.688	35.427	35.975	36.274	37.066	34.556	34.7
	34.528	34.554	34.868	36.726	35.39	35.961	36.251	37.081	34.471	34.699
	34.485	34.48	34.868	36.685	35.344	35.963	36.254	37.084	34.412	34.713
	34.444	34.428	34.862	36.667	35.301	35.981	36.226	37.1	34.362	34.688
	34.432	34.393	34.854	36.677	35.264	36.024	36.199	37.095	34.319	34.728
	34.444	34.376	34.844	36.617	35.257	36.084	36.166	37.127	34.29	34.826
	34.472	34.325	34.803	36.534	35.235	36.122	36.114	37.145	34.27	34.844
	34.487	34.261	34.776	36.468	35.226	36.124	36.14	37.17	34.256	34.89
	34.486	34.28	34.748	36.417	35.211	36.083	36.128	37.092	34.24	34.901
	34.467	34.406	34.743	36.37	35.116	36.036	36.009	37.011	34.231	34.897
	34.467	34.513	34.745	36.318	35.187	35.995	35.969	36.937	34.221	34.915
	34.46	34.64	34.741	36.285	35.166	35.964	35.888	36.888	34.167	34.957
	34.449	34.721	34.746	36.26	35.145	35.935	35.865	37.004	34.104	34.944
	34.433	34.745	34.748	36.282	35.152	35.939	35.856	36.994	34.074	34.96
	34.436	34.785	34.746	36.31	35.175	35.957	35.814	36.941	34.066	34.979
	34.443	34.797	34.751	36.313	35.187	35.951	35.777	36.907	34.066	34.9
	34.44	34.759	34.753	36.309	35.192	35.93	35.743	36.855	34.069	34.838
	34.437	34.75	34.743	36.297	35.181	35.913	35.744	36.804	34.076	34.806
	34.446	34.745	34.748	36.266	35.195	35.9	35.874	36.774	34.087	34.787
	34.442	34.686	34.756	36.252	35.22	35.875	36.021	36.763	34.102	34.767
	34.436	34.762	34.755	36.252	35.236	35.887	36.096	36.744	34.118	34.733
	34.462	34.798	34.721	36.241	35.257	35.955	36.121	36.73	34.145	34.705
	34.484	34.823	34.711	36.241	35.278	36.018	36.124	36.73	34.157	34.682
	34.497	34.836	34.701	36.22	35.311	36.071	36.1	36.735	34.176	34.665
	34.513	34.915	34.695	36.197	35.32	36.109	36.032	36.739	34.163	34.627
	34.512	34.837	34.697	36.187	35.323	36.154	36.028	36.745	34.1	34.625
	34.511	34.768	34.711	36.206	35.331	36.205	36.103	36.739	34.028	34.597
	34.496	34.739	34.711	36.195	35.313	36.242	36.175	36.724	34.024	34.568
	34.494	34.727	34.714	36.193	35.351	36.229	36.226	36.718	34.072	34.512
	34.484	34.736	34.71	36.195	35.318	36.187	36.229	36.723	34.134	34.469
	34.471	34.714	34.705	36.168	35.231	36.156	36.186	36.713	34.285	34.492
	34.475	34.734	34.677	36.157	35.174	36.135	36.168	36.693	34.409	34.592
	34.458	34.681	34.637	36.142	35.147	36.129	36.2	36.681	34.578	34.572
	34.468	34.611	34.639	36.132	35.127	36.123	36.309	36.665	34.588	34.53
	34.443	34.626	34.643	36.113	35.087	36.11	36.241	36.668	34.573	34.608
	34.355	34.636	34.646	36.136	35.051	36.077	36.154	36.643	34.59	34.756
	34.295	34.631	34.645	36.189	35.031	36.053	36.037	36.625	34.628	34.924
	34.236	34.656	34.651	36.202	34.988	36.052	36.02	36.619	34.676	35.249
	34.186	34.666	34.656	36.203	34.954	36.038	36.012	36.619	34.728	35.471
	34.172	34.636	34.661	36.179	34.909	36.027	36.115	36.614	34.771	35.562
	34.118	34.582	34.678	36.145	34.938	36.01	36.08	36.611	34.795	35.456
	34.088	34.582	34.705	36.139	34.946	36	36.066	36.614	34.807	35.407
	34.069	34.613	34.725	36.144	34.966	35.988	36.106	36.607	34.834	35.387
	34.058	34.693	34.749	36.156	34.988	35.978	36.239	36.607	34.853	35.224
	34.025	34.796	34.759	36.192	35.021	35.965	36.351	36.596	34.868	35.036
	34.016	34.825	34.773	36.191	35.056	35.959	36.495	36.662	34.87	34.834
	34.028	34.976	34.776	36.18	35.094	35.949	36.602	36.823	34.805	34.716
	34.103	35.027	34.79	36.217	35.127	35.909	36.663	36.918	34.736	34.622
	34.053	35.029	34.759	36.201	35.169	35.896	36.67	36.904	34.66	34.479
	34.04	35.002	34.938	36.166	35.192	35.879	36.645	36.872	34.581	34.253
	34.042	35.026	35.14	36.199	35.201	35.871	36.596	36.855	34.515	34.049
	34.059	35.025	35.216	36.258	35.187	35.86	36.559	36.842	34.476	33.95
	34.075	35.035	35.213	36.248	35.165	35.847	36.465	36.837	34.424	34.024
	34.084	35.032	35.092	36.255	35.137	35.848	36.418	36.831	34.384	34.117
	34.09	35.049	35.094	36.256	35.106	35.848	36.344	36.833	34.351	34.389
	34.088	34.997	35.006	36.26	35.069	35.848	36.284	36.829	34.33	34.756
	34.1	35.04	35.096	36.28	35.002	35.828	36.247	36.827	34.327	35.076
	34.089	35.083	35.152	36.323	34.957	35.826	36.204	36.815	34.295	35.318
	34.097	35.181	35.215	36.318	34.926	35.84	36.194	36.803	34.247	35.504
	34.095	35.183	35.168	36.295	34.889	35.845	36.21	36.788	34.218	35.635
	34.083	35.154	35.12	36.272	34.822	35.85	36.229	36.777	34.199	35.746
	34.07	35.063	35.087	36.31	34.769	35.851	36.218	36.775	34.197	35.815
	34.053	35.03	35.104	36.303	34.727	35.85	36.204	36.772	34.196	35.855
	34.006	34.957	35.115	36.318	34.711	35.841	36.169	36.782	34.212	35.87
	33.938	34.913	35.148	36.352	34.718	35.842	36.132	36.75	34.227	35.874
	33.873	34.917	35.129	36.379	34.72	35.844	36.069	36.672	34.227	35.886
	33.807	34.92	35.115	36.373	34.708	35.851	36.022	36.614	34.225	35.87
	33.749	34.95	35.109	36.403	34.666	35.861	35.982	36.586	34.186	35.822
	33.709	35.085	35.105	36.426	34.634	35.875	35.946	36.555	34.147	35.761
	33.703	35.172	35.097	36.454	34.62	35.878	35.929	36.528	34.124	35.693
	33.668	35.181	35.225	36.417	34.627	35.888	35.905	36.505	34.131	35.615
	33.649	35.143	35.331	36.422	34.634	35.882	35.873	36.486	34.218	35.549
	33.602	35.099	35.388	36.408	34.606	35.888	35.841	36.472	34.251	35.493
	33.573	35.019	35.443	36.459	34.61	35.9	35.822	36.458	34.251	35.374
	33.54	34.879	35.524	36.515	34.62	35.901	35.805	36.458	34.246	35.214
	33.529	34.851	35.639	36.568	34.607	35.896	35.797	36.455	34.237	35.024
	33.529	34.804	35.696	36.573	34.614	35.911	35.773	36.456	34.229	34.952
	33.529	34.831	35.687	36.59	34.662	35.905	35.749	36.467	34.208	34.881
	33.532	34.793	35.811	36.628	34.707	35.879	35.727	36.45	34.185	34.828
	33.538	34.79	35.908	36.61	34.737	35.87	35.727	36.425	34.165	34.776
	33.538	34.812	35.911	36.647	34.749	35.842	35.694	36.432	34.146	34.731
	33.542	34.877	35.929	36.673	34.767	35.826	35.687	36.456	34.12	34.706
	33.545	34.933	35.92	36.725	34.779	35.822	35.707	36.45	34.107	34.689
	33.552	34.952	35.901	36.734	34.778	35.801	35.709	36.445	34.133	34.667
	33.566	34.87	35.859	36.761	34.766	35.802	35.716	36.447	34.123	34.655
	33.576	34.787	35.836	36.777	34.75	35.772	35.721	36.447	34.099	34.651
	33.584	34.743	35.81	36.765	34.711	35.761	35.716	36.446	34.071	34.661
	33.577	34.765	35.834	36.736	34.656	35.723	35.718	36.456	34.053	34.658
	33.58	34.843	35.795	36.758	34.648	35.685	35.693	36.472	34.034	34.661
	33.633	34.898	36	36.63	34.646	35.645	35.652	36.496	34.018	34.669
	33.745	34.883	36.052	36.57	34.66	35.651	35.618	36.529	34.001	34.705
	33.777	34.885	36.076	36.595	34.655	35.671	35.586	36.555	33.988	34.72
	33.798	34.855	36.071	36.597	34.703	35.673	35.564	36.574	33.983	34.728
	33.808	34.9	36.083	36.617	34.745	35.69	35.543	36.562	33.972	34.73
	33.835	34.905	36.093	36.589	34.779	35.712	35.517	36.561	33.957	34.717
	33.911	34.86	36.125	36.564	34.827	35.75	35.499	36.556	33.972	34.705
	33.974	34.8	36.141	36.564	34.863	35.774	35.485	36.545	34.057	34.697
	34.028	34.703	36.268	36.566	34.913	35.762	35.465	36.539	34.072	34.69
	34.067	34.608	36.149	36.669	34.965	35.76	35.462	36.531	34.056	34.68
	34.089	34.594	36.167	36.657	34.931	35.76	35.442	36.522	34.041	34.66
	34.103	34.634	36.218	36.675	34.925	35.775	35.41	36.517	34.038	34.628
	34.112	34.659	36.24	36.636	35.059	35.781	35.391	36.497	34.084	34.585
	34.124	34.57	36.25	36.63	35.156	35.799	35.385	36.478	34.125	34.558
	34.121	34.478	36.245	36.602	35.199	35.798	35.385	36.447	34.15	34.536
	34.15	34.56	36.223	36.591	35.25	35.809	35.389	36.415	34.172	34.508
	34.14	34.681	36.233	36.577	35.15	35.822	35.39	36.376	34.181	34.49
	34.137	34.785	36.127	36.536	35.091	35.813	35.393	36.346	34.217	34.468
	34.138	34.84	35.992	36.523	35.153	35.795	35.396	36.324	34.226	34.462
	34.141	34.814	35.897	36.52	35.125	35.778	35.393	36.299	34.226	34.457
	34.181	34.783	35.848	36.482	35.146	35.759	35.387	36.281	34.216	34.448
	34.179	34.778	35.792	36.447	35.174	35.726	35.367	36.269	34.196	34.437
	34.165	34.772	35.759	36.348	35.197	35.697	35.376	36.306	34.234	34.427
	34.17	34.745	35.741	36.298	35.282	35.661	35.403	36.439	34.236	34.421
	34.166	34.487	35.728	36.313	35.284	35.649	35.433	36.5	34.218	34.41
	34.158	34.298	35.729	36.326	35.192	35.653	35.469	36.496	34.201	34.402
	34.141	34.199	35.695	36.299	35.164	35.639	35.497	36.488	34.187	34.387
	34.114	34.151	35.759	36.275	35.151	35.651	35.507	36.488	34.18	34.384
	34.093	34.13	35.755	36.313	35.21	35.67	35.499	36.497	34.18	34.372
	34.071	34.12	35.776	36.32	35.209	35.68	35.496	36.504	34.169	34.365
	34.056	34.117	35.814	36.323	35.154	35.677	35.486	36.504	34.148	34.318
	34.038	34.108	35.83	36.34	35.13	35.669	35.466	36.5	34.122	34.263
	34.022	34.105	35.793	36.375	35.157	35.677	35.448	36.503	34.092	34.22
	34.003	34.105	35.78	36.414	35.149	35.71	35.455	36.505	34.04	34.185
	34.022	34.107	35.775	36.476	35.114	35.734	35.468	36.505	34.038	34.163
	34.037	34.116	35.813	36.532	35.138	35.754	35.474	36.506	34.033	34.152
	34.073	34.119	35.883	36.547	35.097	35.765	35.491	36.502	34.036	34.139
	34.106	34.137	36.061	36.525	35.006	35.775	35.5	36.507	34.097	34.141
	34.14	34.253	36.168	36.54	34.932	35.778	35.508	36.497	34.136	34.146
	34.165	34.345	36.28	36.527	34.869	35.783	35.507	36.492	34.147	34.15
	34.188	34.451	36.336	36.532	34.888	35.778	35.515	36.484	34.165	34.149
	34.188	34.529	36.211	36.511	34.951	35.773	35.515	36.477	34.197	34.148
	34.182	34.568	36.213	36.518	34.959	35.781	35.515	36.474	34.194	34.147
	34.198	34.59	36.241	36.561	34.917	35.775	35.499	36.476	34.193	34.143
	34.209	34.609	36.281	36.59	34.933	35.776	35.483	36.479	34.196	34.147
	34.224	34.624	36.281	36.598	34.851	35.772	35.451	36.474	34.186	34.153
	34.207	34.612	36.311	36.565	34.774	35.77	35.459	36.475	34.171	34.156
	34.182	34.602	36.313	36.548	34.832	35.761	35.482	36.468	34.194	34.158
	34.204	34.596	36.32	36.519	34.95	35.748	35.53	36.458	34.224	34.164
	34.214	34.588	36.357	36.515	34.968	35.724	35.572	36.428	34.232	34.161
	34.218	34.577	36.53	36.506	34.986	35.735	35.607	36.398	34.236	34.158
	34.23	34.577	36.465	36.477	35.001	35.779	35.622	36.392	34.232	34.162
	34.226	34.599	36.503	36.471	35.034	35.765	35.625	36.377	34.226	34.164
	34.203	34.613	36.499	36.496	35.092	35.739	35.612	36.379	34.225	34.167
	34.209	34.63	36.499	36.507	35.061	35.756	35.607	36.368	34.246	34.161
	34.244	34.685	36.497	36.485	35.006	35.793	35.571	36.368	34.259	34.156
	34.258	34.75	36.462	36.475	34.992	35.824	35.541	36.365	34.273	34.164
	34.257	34.722	36.487	36.472	35.053	35.839	35.531	36.36	34.297	34.204
	34.262	34.671	36.471	36.477	35.051	35.85	35.524	36.356	34.369	34.231
	34.264	34.617	36.414	36.5	35.059	35.847	35.524	36.365	34.511	34.251
	34.264	34.622	36.336	36.502	35.014	35.845	35.518	36.351	34.398	34.263
	34.274	34.67	36.306	36.519	35.014	35.834	35.527	36.344	34.462	34.248
	34.281	34.591	36.397	36.564	35.001	35.83	35.537	36.344	34.639	34.23
	34.376	34.51	36.387	36.567	35.01	35.825	35.535	36.345	34.735	34.233
	34.388	34.447	36.423	36.597	34.975	35.82	35.521	36.35	34.78	34.242
	34.373	34.401	36.459	36.602	35.023	35.826	35.5	36.344	34.707	34.249
	34.34	34.378	36.506	36.598	34.946	35.828	35.546	36.33	34.661	34.25
	34.328	34.366	36.457	36.622	35.009	35.838	35.473	36.305	34.693	34.248
	34.371	34.378	36.51	36.639	35.067	35.835	35.451	36.269	34.611	34.249
	34.397	34.39	36.574	36.68	34.698	35.826	35.44	36.248	34.562	34.256
	34.416	34.419	36.546	36.619	35.217	35.828	35.442	36.223	34.436	34.267
	34.462	34.502	36.492	36.596	35.249	35.825	35.453	36.207	34.33	34.264
	34.372	34.651	36.43	36.625	35.249	35.82	35.452	36.184	34.322	34.261
	34.344	34.773	36.374	36.626	35.256	35.832	35.464	36.168	34.349	34.258
	34.383	34.866	36.346	36.672	35.184	35.842	35.484	36.15	34.356	34.258
	34.416	34.931	36.243	36.719	35.237	35.844	35.533	36.129	34.31	34.27
	34.441	34.979	36.226	36.7	35.327	35.849	35.555	36.113	34.232	34.279
	34.371	35.033	36.271	36.709	35.315	35.839	35.562	36.09	34.154	34.283
	34.347	35.024	36.295	36.709	35.321	35.835	35.563	36.071	34.095	34.285
	34.356	35.019	36.331	36.724	35.296	35.847	35.567	36.055	34.191	34.287
	34.414	34.96	36.304	36.734	35.276	35.858	35.562	36.04	34.276	34.273
	34.503	34.898	36.258	36.752	35.214	35.854	35.558	36.049	34.317	34.144
	34.528	34.86	36.37	36.797	35.2	35.86	35.572	36.06	34.338	34.008
	34.503	34.837	36.384	36.85	35.171	35.878	35.553	36.085	34.34	33.913
	34.485	34.83	36.435	36.857	35.13	35.877	35.538	36.108	34.339	33.854
	34.476	34.855	36.473	36.854	35.231	35.871	35.519	36.17	34.4	33.81
	34.616	34.846	36.543	36.882	35.318	35.885	35.494	36.202	34.408	33.78
	34.654	34.766	36.598	36.912	35.514	35.875	35.493	36.209	34.376	33.776
	34.749	34.693	36.564	36.928	35.716	35.859	35.479	36.346	34.323	33.777
	34.827	34.657	36.485	36.976	35.837	35.858	35.47	36.389	34.345	33.775
	34.868	34.64	36.527	36.966	35.803	35.851	35.452	36.39	34.465	33.766
	34.869	34.629	36.582	36.988	35.831	35.841	35.444	36.38	34.46	33.756
	34.845	34.61	36.606	36.998	35.76	35.842	35.431	36.354	34.534	33.739
	34.804	34.607	36.479	36.963	35.82	35.847	35.43	36.339	34.554	33.702
	34.797	34.609	36.386	36.901	35.735	35.856	35.417	36.343	34.519	33.666
	34.777	34.614	36.25	36.857	35.612	35.862	35.388	36.339	34.514	33.646
	34.791	34.626	36.13	36.894	35.561	35.857	35.333	36.342	34.556	33.655
	34.792	34.637	36.021	36.859	35.47	35.863	35.398	36.338	34.51	33.664
	34.649	34.703	35.932	36.882	35.416	35.873	35.518	36.335	34.462	33.568
	34.437	34.763	35.844	36.993	35.466	35.879	35.493	36.337	34.43	33.457
	34.314	34.803	35.774	36.981	35.379	35.881	35.356	36.33	34.401	33.385
	34.176	34.84	35.723	36.938	35.301	35.881	35.317	36.327	34.366	33.341
	34.058	34.862	35.678	36.896	35.439	35.89	35.321	36.319	34.35	33.316
	33.959	34.853	35.618	36.997	35.598	35.894	35.308	36.323	34.626	33.3
	33.854	34.849	35.571	37.058	35.621	35.901	35.264	36.316	34.476	33.289
	33.761	34.794	35.526	37.025	35.566	35.906	35.233	36.316	34.554	33.29
	33.682	34.74	35.484	36.934	35.54	35.909	35.225	36.308	34.662	33.29
	33.598	34.75	35.45	36.867	35.593	35.923	35.24	36.304	34.618	33.298
	33.576	34.821	35.405	36.824	35.572	35.931	35.23	36.312	34.593	33.3
	33.519	34.821	35.376	36.761	35.537	35.935	35.266	36.317	34.594	33.298
	33.524	34.872	35.354	36.722	35.53	35.943	35.289	36.312	34.601	33.306
	33.504	34.909	35.415	36.671	35.475	35.946	35.25	36.319	34.609	33.318
	33.52	34.908	35.604	36.626	35.434	35.964	35.265	36.317	34.609	33.344
	33.544	34.926	35.639	36.577	35.454	35.967	35.32	36.315	34.683	33.602
	33.691	34.941	35.615	36.545	35.476	35.97	35.34	36.318	34.763	33.846
	33.698	34.901	35.574	36.515	35.448	35.96	35.296	36.316	34.807	33.936
	33.649	34.846	35.564	36.488	35.412	35.949	35.309	36.311	34.851	33.953
	33.587	34.812	35.558	36.447	35.412	35.946	35.306	36.304	34.887	33.8
	33.542	34.774	35.614	36.415	35.437	35.943	35.285	36.288	34.825	33.659
	33.518	34.712	35.666	36.368	35.267	35.946	35.363	36.301	34.808	33.572
	33.511	34.779	35.695	36.307	35.449	35.928	35.361	36.305	34.868	33.531
	33.51	34.77	35.716	36.271	35.456	35.91	35.337	36.311	34.896	33.503
	33.491	34.683	35.725	36.278	35.433	35.921	35.484	36.313	34.96	33.494
	33.733	34.652	35.731	36.283	35.46	35.92	35.666	36.307	34.962	33.486
	33.81	34.679	35.731	36.271	35.586	35.915	35.749	36.309	34.979	33.486
	33.816	34.654	35.724	36.268	35.665	35.918	35.716	36.316	34.962	33.495
	33.881	34.641	35.723	36.273	35.765	35.912	35.724	36.323	34.868	33.507
	34.132	34.627	35.715	36.255	35.66	35.906	35.739	36.333	34.779	33.493
	34.216	34.619	35.713	36.25	35.591	35.915	35.762	36.339	34.754	33.48
	34.275	34.631	35.704	36.25	35.655	35.939	35.769	36.334	34.73	33.49
	34.325	34.61	35.694	36.249	35.563	35.955	35.782	36.334	34.757	33.526
	34.349	34.602	35.685	36.233	35.584	35.966	35.821	36.335	34.75	33.545
	34.367	34.611	35.719	36.222	35.595	35.972	35.862	36.364	34.858	33.551
	34.24	34.6	35.747	36.219	35.537	35.981	35.851	36.375	34.865	33.558
	34.507	34.68	35.756	36.222	35.302	36	35.849	36.333	34.947	33.554
	34.553	34.748	35.747	36.198	35.098	36.003	35.887	36.303	34.948	33.567
	34.521	34.796	35.747	36.193	34.969	36.003	35.924	36.286	34.971	33.578
	34.373	34.74	35.731	36.181	34.839	36.008	35.962	36.262	34.985	33.58
	34.349	34.747	35.709	36.164	34.723	36.011	35.949	36.254	34.965	33.584
	34.442	34.724	35.679	36.149	34.627	36.006	35.962	36.24	34.899	33.596
	34.525	34.729	35.661	36.168	34.53	36.017	35.979	36.235	34.832	33.599
	34.62	34.667	35.651	36.208	34.469	36.026	36.023	36.22	34.724	33.66
	34.577	34.643	35.63	36.213	34.417	36.033	36.035	36.211	34.658	33.682
	34.626	34.72	35.63	36.203	34.356	36.037	36.058	36.214	34.702	33.695
	34.665	34.711	35.589	36.202	34.321	36.032	36.078	36.254	34.765	33.854
	34.714	34.738	35.564	36.197	34.251	36.04	36.126	36.291	34.878	33.929
	34.852	34.849	35.538	36.217	34.233	36.048	36.114	36.32	34.922	33.872
	34.776	34.876	35.549	36.214	34.236	36.045	36.21	36.286	34.878	33.834
	34.806	34.855	35.496	36.192	34.238	36.051	36.109	36.291	34.839	33.828
	34.798	34.79	35.471	36.168	34.227	36.045	36.102	36.293	34.848	33.875
	34.752	34.796	35.446	36.145	34.24	36.039	36.128	36.293	34.863	33.883
	34.743	34.804	35.425	36.116	34.209	36.021	36.141	36.294	34.89	33.894
	34.75	34.824	35.414	36.094	34.194	36.015	36.126	36.294	34.915	33.939
	34.829	34.891	35.394	36.088	34.174	36.019	36.121	36.297	34.809	34.009
	34.769	34.954	35.374	36.056	34.175	36.017	36.17	36.285	34.907	33.892
	34.656	35.008	35.355	36.028	34.163	36.026	36.176	36.286	34.907	33.779
	34.608	35.16	35.343	36.007	34.139	36.035	36.2	36.285	34.901	33.72
	34.548	35.334	35.344	35.973	34.14	36.014	36.22	36.249	34.966	33.685
	34.495	35.34	35.398	35.965	34.122	35.999	36.264	36.252	34.954	33.635
	34.542	35.231	35.459	35.965	34.253	36.003	36.312	36.255	34.911	33.617
	34.691	35.153	35.537	35.979	34.268	35.991	36.263	36.255	34.839	33.639
	34.954	35.101	35.531	35.99	34.259	35.987	36.281	36.254	34.791	33.746
	35.156	35.07	35.498	35.995	34.24	35.954	36.231	36.252	34.764	33.8
	35.289	35.115	35.47	36.005	34.24	35.956	36.216	36.226	34.737	33.81
	35.449	35.159	35.46	36.001	34.244	35.972	36.128	36.2	34.688	33.794
	35.535	35.166	35.452	36.005	34.245	36.052	36.049	36.176	34.689	33.764
	35.662	35.263	35.451	36.017	34.224	36.108	35.992	36.17	34.708	33.72
	35.761	35.257	35.435	36.024	34.223	36.037	35.94	36.162	34.741	33.681
	35.635	35.154	35.425	36.022	34.228	35.981	35.891	36.152	34.798	33.667
	35.674	35.223	35.418	36.02	34.233	36.022	35.86	36.142	34.832	33.661
	35.637	35.258	35.414	36.026	34.237	35.985	35.935	36.123	34.794	33.688
	35.603	35.291	35.423	36.025	34.245	35.979	36.026	36.093	34.762	33.899
	35.56	35.241	35.416	36.006	34.36	35.98	36.119	36.071	34.902	34.034
	35.573	35.189	35.315	35.98	34.501	35.981	36.139	36.005	34.982	34.092
	35.563	35.139	35.27	35.984	34.65	35.965	36.132	35.995	34.998	34.087
	35.527	35.124	35.213	35.964	34.82	35.957	36.311	35.984	35.003	34.074
	35.377	35.105	35.162	35.948	34.915	35.95	36.471	35.962	34.897	33.975
	35.247	35.113	35.135	35.93	35.02	35.952	36.577	36.027	34.807	33.876
	35.262	35.168	35.113	35.91	35.165	35.966	36.595	36.155	34.81	33.817
	35.073	35.137	35.092	35.899	35.26	35.964	36.579	36.228	34.846	33.785
	34.938	35.181	35.079	35.874	35.374	35.878	36.527	36.242	34.831	33.741
	34.841	35.26	35.048	35.819	35.305	35.823	36.498	36.24	34.913	33.733
	34.707	35.235	35.117	35.765	35.506	35.758	36.49	36.267	35.02	33.777
	34.721	35.256	35.211	35.725	35.526	35.706	36.466	36.241	35.357	33.751
	34.701	35.213	35.238	35.677	35.682	35.67	36.447	36.279	35.52	33.689
	34.631	35.174	35.227	35.625	35.877	35.633	36.441	36.308	35.399	33.63
	34.74	35.186	35.076	35.581	35.992	35.636	36.432	36.332	35.291	33.574
	34.871	35.208	35.078	35.567	35.946	35.605	36.424	36.314	35.311	33.532
	34.887	35.255	35.075	35.572	35.962	35.567	36.422	36.238	35.257	33.499
	34.714	35.204	35.062	35.551	35.94	35.568	36.427	36.23	35.148	33.482
	34.699	35.101	35.066	35.537	35.916	35.53	36.362	36.218	35.029	33.48
	34.77	35.075	35.061	35.536	35.82	35.498	36.301	36.285	34.99	33.517
	34.88	35.037	35.054	35.535	35.759	35.53	36.234	36.224	35.085	33.685
	34.904	34.96	35.04	35.546	35.719	35.61	36.183	36.158	35.071	33.757
	34.832	34.897	35.034	35.548	35.672	35.631	36.182	36.12	35.035	33.753
	34.717	34.833	35.029	35.555	35.655	35.645	36.179	36.205	35.113	33.808
	34.639	34.77	35.021	35.579	35.673	35.735	36.243	36.283	35.114	33.967
	34.585	34.8	35.009	35.677	35.583	35.727	36.292	36.334	35.059	34.063
	34.539	34.86	35.011	35.754	35.552	35.716	36.32	36.363	35.136	33.961
	34.5	34.907	35.005	35.82	35.454	35.683	36.354	36.394	35.255	33.889
	34.466	34.927	35.012	35.901	35.37	35.633	36.396	36.4	35.291	33.809
	34.481	34.94	35.009	35.89	35.411	35.587	36.36	36.396	35.395	33.744
	34.671	34.95	35.009	35.885	35.389	35.528	36.362	36.397	35.599	33.685
	34.786	34.955	35.007	35.912	35.334	35.488	36.268	36.475	35.798	33.668
	34.886	35.072	35.004	35.922	35.258	35.457	36.189	36.52	35.852	33.646
	34.94	35.118	35.016	35.938	35.192	35.428	36.132	36.503	35.866	33.644
	35.004	35.136	35.056	35.971	35.143	35.412	36.058	36.492	35.577	33.6
	34.998	35.175	35.098	36	35.089	35.41	35.992	36.449	35.311	33.568
	34.897	35.091	35.124	35.996	35.051	35.364	35.946	36.356	35.036	33.531
	34.803	35.016	35.124	35.984	35.029	35.314	35.914	36.292	34.948	33.553
	34.673	34.951	35.13	35.977	35.096	35.286	35.866	36.269	34.891	33.576
	34.694	34.882	35.129	35.973	35.22	35.276	35.842	36.263	34.718	33.592
	34.62	34.819	35.128	35.971	35.254	35.264	35.808	36.286	34.531	33.597
	34.535	34.761	35.126	35.995	35.252	35.205	35.79	36.279	34.444	33.596
	34.445	34.717	35.109	35.993	35.262	35.136	35.934	36.256	34.403	33.628
	34.394	34.688	35.083	36.021	35.232	35.062	35.945	36.267	34.41	33.617
	34.349	34.669	35.063	36.006	35.221	35.008	35.958	36.285	34.411	33.696
	34.329	34.648	35.044	35.959	35.169	34.971	35.973	36.358	34.415	33.675
	34.304	34.623	35.023	35.973	35.131	34.931	35.911	36.402	34.436	33.681
	34.282	34.603	35.002	35.997	35.103	34.909	35.843	36.43	34.456	33.677
	34.261	34.589	34.954	36.01	35.087	34.901	35.818	36.586	34.472	33.679
	34.237	34.574	34.913	36.037	35.065	34.896	35.801	36.545	34.497	33.699
	34.242	34.533	34.898	36.02	35.082	34.93	35.794	36.582	34.536	33.699
	34.296	34.515	34.854	35.991	35.057	34.961	35.795	36.597	34.55	33.842
	34.241	34.516	34.819	35.977	35.134	34.994	35.792	36.685	34.556	33.836
	34.204	34.519	34.797	36.027	35.232	35.036	35.781	36.695	34.567	33.824
	34.184	34.525	34.789	36.081	35.266	35.074	35.762	36.767	34.569	33.804
	34.168	34.593	34.797	36.119	35.296	35.114	35.738	36.774	34.557	33.83
	34.165	34.635	34.794	36.144	35.333	35.156	35.715	36.811	34.546	33.852
	34.181	34.65	34.799	36.123	35.347	35.248	35.696	36.713	34.542	33.862
	34.188	34.714	34.8	36.181	35.328	35.335	35.667	36.871	34.541	33.862
	34.181	34.799	34.802	36.224	35.314	35.361	35.654	36.829	34.54	33.914
	34.173	34.816	34.797	36.3	35.286	35.375	35.645	36.952	34.559	33.924
	34.17	34.837	34.814	36.353	35.255	35.392	35.634	36.99	34.569	33.93
	34.163	34.834	34.804	36.302	35.24	35.405	35.609	36.975	34.579	33.924
	34.178	34.825	34.811	36.302	35.218	35.415	35.589	36.994	34.585	33.97
	34.2	34.781	34.807	36.369	35.215	35.44	35.59	36.989	34.588	34.008
	34.228	34.754	34.795	36.423	35.259	35.458	35.574	37.008	34.588	33.978
	34.258	34.742	34.799	36.451	35.288	35.483	35.558	37.028	34.583	33.987
	34.229	34.742	34.792	36.43	35.355	35.488	35.544	37.004	34.585	34.058
	34.182	34.74	34.787	36.357	35.401	35.499	35.533	37.01	34.587	34.137
	34.14	34.751	34.781	36.386	35.426	35.51	35.528	37.043	34.594	34.155
	34.119	34.767	34.775	36.441	35.466	35.502	35.516	37.051	34.598	34.184
	34.118	34.782	34.78	36.417	35.469	35.474	35.498	37.07	34.579	34.145
	34.107	34.74	34.766	36.518	35.487	35.452	35.496	37.087	34.556	34.127
	34.1	34.701	34.76	36.579	35.505	35.39	35.484	37.066	34.538	34.369
	34.11	34.685	34.776	36.6	35.467	35.342	35.479	37.104	34.531	34.488
	34.095	34.678	34.781	36.598	35.371	35.312	35.482	37.133	34.521	34.5
	34.085	34.641	34.801	36.656	35.267	35.299	35.477	37.138	34.513	34.46
	34.075	34.614	34.822	36.69	35.173	35.3	35.436	37.122	34.509	34.534
	34.162	34.634	34.835	36.684	35.112	35.302	35.405	37.092	34.51	34.578
	34.264	34.662	34.847	36.675	35.066	35.331	35.503	36.95	34.503	34.596
	34.31	34.684	34.853	36.635	35.032	35.367	35.598	36.844	34.496	34.612
	34.343	34.682	34.841	36.552	34.995	35.404	35.577	36.769	34.494	34.594
	34.365	34.685	34.856	36.563	34.976	35.438	35.577	36.729	34.511	34.611
	34.398	34.688	34.855	36.547	34.948	35.482	35.581	36.668	34.527	34.64
	34.422	34.69	34.849	36.36	34.928	35.493	35.569	36.661	34.547	34.655
	34.437	34.676	34.838	36.498	34.895	35.512	35.574	36.685	34.537	34.596
	34.461	34.69	34.838	36.477	34.885	35.517	35.585	36.775	34.508	34.635
	34.472	34.816	34.836	36.465	34.872	35.519	35.594	36.823	34.49	34.646
	34.474	34.901	34.865	36.429	34.898	35.525	35.594	36.888	34.471	34.635
	34.487	35.035	34.858	36.406	34.927	35.524	35.592	36.915	34.455	34.632
	34.491	35	34.859	36.367	34.946	35.525	35.603	36.939	34.441	34.634
	34.493	34.878	34.846	36.364	34.961	35.518	35.6	36.941	34.426	34.6
	34.487	34.765	34.837	36.327	34.982	35.499	35.596	36.933	34.396	34.655
	34.478	34.674	34.82	36.285	34.975	35.48	35.599	36.907	34.362	34.71
	34.38	34.569	34.817	36.241	34.994	35.48	35.6	36.89	34.357	34.75
	34.301	34.47	34.806	36.206	35.006	35.481	35.587	36.92	34.379	34.863
	34.245	34.395	34.788	36.153	35.019	35.508	35.579	36.949	34.39	34.799
	34.198	34.355	34.778	36.124	35.038	35.584	35.557	36.982	34.399	34.825
	34.182	34.333	34.768	36.089	35.03	35.658	35.533	36.99	34.407	34.816
	34.199	34.308	34.771	36.052	35.003	35.705	35.519	36.953	34.42	34.797
	34.217	34.282	34.761	36.024	34.97	35.756	35.515	36.964	34.428	34.778
	34.239	34.256	34.758	35.989	34.989	35.79	35.509	36.956	34.438	34.72
	34.248	34.229	34.748	35.961	34.993	35.83	35.53	36.941	34.442	34.757
	34.244	34.208	34.739	35.922	35	35.842	35.533	36.926	34.452	34.827
	34.242	34.243	34.723	35.906	35.009	35.852	35.525	36.963	34.462	34.848
	34.249	34.324	34.701	35.894	35.027	35.854	35.531	36.988	34.466	34.963
	34.25	34.393	34.691	35.925	35.047	35.87	35.533	36.957	34.494	35.154
	34.292	34.532	34.67	35.943	35.062	35.887	35.539	36.927	34.521	35.169
	34.331	34.685	34.741	35.984	35.062	35.889	35.528	36.925	34.55	35.059
	34.319	34.746	34.914	36.033	35.065	35.92	35.515	36.959	34.58	34.992
	34.288	34.801	34.972	36.036	35.094	35.931	35.544	36.915	34.542	34.873
	34.246	34.863	34.987	36.037	35.102	35.94	35.541	36.858	34.479	34.761
	34.265	34.889	35.042	36.011	35.098	35.984	35.525	36.801	34.436	34.699
	34.271	34.903	35.097	36.05	35.101	36.052	35.524	36.717	34.411	34.621
	34.264	34.918	35.155	36.081	35.115	36.084	35.503	36.645	34.4	34.561
	34.253	34.934	35.15	36.087	35.098	36.105	35.488	36.63	34.4	34.573
	34.233	34.949	35.142	36.09	35.064	36.101	35.472	36.606	34.402	34.58
	34.24	34.958	35.126	36.082	35.052	36.083	35.462	36.587	34.406	34.608
	34.248	34.968	35.113	36.072	35.074	36.066	35.449	36.53	34.393	34.603
	34.3	34.967	35.098	36.059	35.08	36.141	35.443	36.535	34.369	34.585
	34.296	34.95	35.108	36.038	35.091	36.125	35.417	36.538	34.384	34.435
	34.268	34.901	35.113	36.027	35.076	36.107	35.43	36.511	34.408	34.289
	34.271	34.782	35.111	36.004	35.042	36.087	35.421	36.459	34.422	34.324
	34.325	34.689	35.089	35.976	35.014	36.073	35.425	36.428	34.422	34.379
		34.598	35.08	35.948	35.037	36.066	35.405	36.428	34.404	34.376
		34.604	35.04	35.916	34.993	36.056	35.406	36.491	34.389	34.376
		34.587	34.98	35.897	34.971	36.035	35.415	36.641	34.386	34.385
		34.523	34.966	35.877	34.919	36.035	35.414	36.614	34.394	34.409
		34.488	34.954	35.847	34.889	36.052	35.414	36.576	34.401	34.428
		34.502	34.957	35.819	34.838	36.062	35.403	36.591	34.406	34.441
		34.559	34.912	35.791	34.803	36.059	35.404	36.617	34.395	34.445
		34.707	34.919	35.754	34.767	36.062	35.408	36.69	34.398	34.466
		34.872	34.895	35.696	34.75	36.038	35.406	36.753	34.394	34.421
		34.841	34.927	35.663	34.711	36.036	35.396	36.739	34.392	34.377
		34.83	34.956	35.647	34.68	36.085	35.398	36.766	34.394	34.321
		34.868	34.987	35.634	34.684	36.114	35.401	36.804	34.392	34.28
		35.056	35.003	35.639	34.673	36.132	35.392	36.787	34.385	34.314
		35.257	35.022	35.648	34.687	36.123	35.396	36.794	34.376	34.326
		35.33	35.029	35.654	34.694	36.102	35.399	36.818	34.371	34.355
		35.288	35.042	35.653	34.712	36.091	35.384	36.911	34.375	34.335
		35.286	35.031	35.653	34.707	36.076	35.382	36.877	34.393	34.464
		35.242	35.039	35.651	34.701	36.059	35.382	36.826	34.373	34.463
		35.126	35.022	35.632	34.689	36.057	35.385	36.763	34.296	34.392
		35.01	34.995	35.62	34.665	36.053	35.387	36.783	34.237	34.365
		34.908	34.969	35.61	34.675	36.025	35.401	36.848	34.183	34.524
		34.818	34.951	35.596	34.655	36.046	35.393	36.912	34.134	34.653
		34.631	34.911	35.572	34.64	36.051	35.385	36.995	34.093	34.832
		34.447	34.888	35.565	34.624	36.057	35.367	37.063	34.077	34.953
		34.304	34.879	35.563	34.591	36.059	35.352	37.003	34.059	35.031
		34.208	34.889	35.56	34.585	36.086	35.347	36.851	34.041	35.075
		34.136	34.879	35.625	34.558	36.154	35.327	36.714	34.028	35.096
		34.084	34.894	35.648	34.422	36.194	35.331	36.646	34.02	35.125
		34.058	34.912	35.643	34.781	36.226	35.355	36.601	34.014	35.14
		34.056	34.934	35.638	35.287	36.229	35.368	36.611	34.005	35.153
		34.062	34.939	35.632	35.551	36.239	35.372	36.639	33.991	35.16
		34.09	34.941	35.634	35.616	36.254	35.367	36.686	33.984	35.206
		34.123	34.947	35.626	35.636	36.269	35.356	36.756	33.979	35.236
		34.149	34.955	35.607	35.614	36.256	35.358	36.79	33.953	35.245
		34.182	34.957	35.601	35.585	36.242	35.358	36.766	33.925	35.241
		34.204	34.955	35.592	35.56	36.255	35.368	36.738	33.99	35.236
		34.221	34.949	35.574	35.533	36.272	35.374	36.659	34.057	35.221
		34.264	34.943	35.598	35.507	36.294	35.37	36.734	34.045	35.204
		34.324	34.903	35.634	35.481	36.294	35.357	36.855	34.043	35.184
		34.323	34.893	35.631	35.468	36.274	35.361	36.785	34.071	35.163
		34.337	34.888	35.644	35.409	36.301	35.358	36.634	34.077	35.145
		34.323	34.889	35.638	35.356	36.268	35.348	36.567	34.287	35.125
		34.312	34.813	35.637	35.302	36.242	35.333	36.447	34.286	35.071
		34.322	34.778	35.627	35.267	36.208	35.339	36.363	34.378	34.997
		34.343	34.759	35.645	35.176	36.189	35.329	36.361	34.455	34.926
		34.362	34.746	35.68	35.12	36.216	35.317	36.385	34.443	34.871
		34.366	34.737	35.692	35.064	36.236	35.308	36.45	34.488	34.784
		34.364	34.754	35.678	35.07	36.253	35.314	36.526	34.46	34.573
		34.369	34.75	35.656	35.044	36.263	35.314	36.54	34.237	34.331
		34.378	34.759	35.651	35.048	36.275	35.312	36.557	34.047	34.103
		34.396	34.833	35.625	35.065	36.281	35.329	36.537	33.918	34.027
		34.409	34.954	35.577	35.073	36.305	35.337	36.564	33.842	34.062
		34.434	35.025	35.536	35.062	36.334	35.353	36.568	33.81	34.037
		34.449	35.056	35.493	35.044		35.358	36.526	33.798	34.014
		34.456	34.982	35.479	35.024		35.333	36.501	33.806	34.012
		34.469	34.982	35.465	35.018		35.334	36.469	33.834	34.024
		34.477	34.905	35.461	35.012		35.329	36.426	33.854	34.044
		34.49	34.918	35.493	35.014		35.342	36.383	33.952	34.067
		34.504	34.941	35.501	35.005		35.335	36.336	33.991	34.097
		34.51	34.972	35.513	34.994		35.328	36.305	33.965	34.125
		34.523	34.982	35.513	35.007		35.324	36.283	33.931	34.139
		34.536	35.07	35.512	35.008		35.328	36.261	33.911	34.151
		34.582	35.196	35.508	35.022		35.333	36.242	33.901	34.173
		34.586	35.218	35.511	35.016		35.333	36.247	33.916	34.192
		34.589	35.215	35.51	34.997		35.333	36.261	33.907	34.21
		34.582	35.232	35.495	34.995		35.331	36.24	33.896	34.17
		34.594	35.291	35.486	34.992		35.318	36.216	33.883	34.12
		34.631	35.279	35.479	34.992		35.307	36.213	33.868	34.074
		34.634	35.241	35.463	34.982		35.294	36.201	33.857	34.037
		34.646	35.239	35.471	34.976		35.318	36.193	33.862	34
		34.671	35.281	35.489	34.968		35.389	36.177	33.848	33.97
		34.696	35.281	35.497	34.971		35.495	36.154	33.788	33.949
		34.709	35.181	35.502	34.949		35.472	36.123	33.691	34.001
		34.695	35.214	35.522	34.961		35.468	36.093	33.741	34.137
		34.696	35.295	35.556	34.941		35.429	36.071	33.802	34.222
		34.708	35.322	35.582	34.922		35.329	36.025	33.696	34.264
		34.717	35.305	35.633	34.913		35.304	35.992	33.638	34.28
		34.737	35.303	35.625	34.906		35.289	35.969	33.579	34.288
		34.735	35.317	35.628	34.956		35.259	35.957	33.492	34.298
		34.702	35.255	35.624	35.022		35.238	35.954	33.516	34.334
		34.633	35.213	35.622	35.085		35.304	35.948	33.564	34.308
		34.579	35.427	35.613	35.113		35.3	35.922	33.492	34.234
		34.552	35.489	35.608	35.12		35.277	35.915	33.417	34.185
		34.542	35.445	35.628	35.14		35.315	35.91	33.415	34.134
		34.534	35.437	35.62	35.164		35.412	35.916	33.39	34.061
		34.54	35.534	35.602	35.157		35.554	35.913	33.452	34.004
		34.517	35.616	35.613	35.152		35.66	35.915	33.385	33.962
		34.502	35.733	35.584	35.154		35.634	35.911	33.365	33.903
		34.495	35.703	35.558	35.149		35.711	35.908	33.364	33.851
		34.495	35.605	35.544	35.145		35.736	35.909	33.415	33.845
		34.496	35.544	35.541	35.159		35.858	35.895	33.452
		34.489	35.47	35.537	35.18		35.909	35.891	33.461
		34.481	35.372	35.532	35.19		35.829	35.881	33.545
		34.479	35.327	35.526	35.198		35.897	35.873	33.619
		34.471	35.28	35.528	35.199		35.934	35.878	33.621
		34.47	35.205	35.533	35.249		35.969	35.878	33.623
		34.467	35.169	35.538	35.202		35.87	35.877	33.669
		34.464	35.094	35.541	35.176		35.894	35.873	33.744
		34.459	35.057	35.532	35.157		35.902	35.873	33.756
		34.45	35.013	35.535	35.16		35.924	35.883	33.718
		34.446	34.986	35.524	35.117		35.902	35.877	33.702
		34.44	34.979	35.525	35.138		35.923	35.874	33.72
		34.428	34.992	35.514	35.135		35.917	35.868	33.746
		34.418	35.033	35.488	35.12		35.921	35.858	33.767
		34.406	35.053	35.489	35.101		35.902	35.853	33.895
		34.399	35.05	35.477	35.091		35.848	35.857	33.886
		34.384	35.059	35.468	35.092		35.868	35.846	33.938
		34.369	35.061	35.449	35.042		35.761	35.839	33.984
		34.37	35.069	35.435	34.958		35.804	35.834	33.996
		34.37	35.066	35.432	34.909		35.905	35.855	34.024
		34.436	35.059	35.425	34.872		35.9	36.004	34.043
		34.463	35.062	35.418	34.843		35.852	36.145	34.031
		34.432	35.056	35.416	34.86		35.957	36.165	33.825
		34.382	35.054	35.411	34.88		36.002	36.131	33.802
		34.343	35.049	35.506	34.894		36.015	36.081	33.801
		34.312	35.05	35.508	34.918		35.952	36.049	33.852
		34.289	35.061	35.491	34.929		35.905	36.019	33.938
		34.273	35.054	35.496	34.937		35.914	35.999	34.022
		34.26	35.019	35.491	34.94		35.906	35.97	34.111
		34.259	35.015	35.506	34.973		35.883	35.955	34.197
		34.249	35.012	35.525	34.943		35.851	35.946	34.238
		34.244	35.018	35.524	34.947		35.842	35.925	34.312
		34.237	35.038	35.569	34.941		35.843	35.911	34.368
		34.228	35.04	35.623	34.951		35.844	35.889	34.331
		34.217	35.052	35.681	34.965		35.857	35.884	34.316
		34.199	35.053	35.636	34.96		35.857	35.884	34.319
		34.187	35.062	35.604	34.934		35.875	35.888	34.328
		34.245	35.052	35.562	34.936		35.884	35.884	34.336
		34.257	35.046	35.542	34.893		35.89	35.871	34.34
		34.242	35.031	35.579	34.848		35.896	35.871	34.345
		34.36	35.019	35.601	34.785		35.852	35.872	34.356
		34.641	35.009	35.613	34.8		35.82	35.868	34.371
		34.709	35.01	35.619	34.784		35.771	35.863	34.366
		34.731	34.995	35.625	34.746		35.759	35.859	34.352
		34.665	34.979	35.649	34.698		35.738	35.856	34.347
		34.61	34.946	35.649	34.693		35.727	35.852	34.345
		34.574	34.903	35.629	34.695		35.729	35.837	34.333
		34.553	34.86	35.619	34.702		35.723	35.822	34.333
		34.558	34.846	35.607	34.7		35.716	35.812	34.314
		34.581	34.838	35.59	34.71		35.722	35.803	34.296
		34.586	34.85	35.589	34.726		35.707	35.787	34.289
		34.58	34.852	35.575	34.741		35.735	35.774	34.292
		34.57	34.865	35.565	34.752		35.736	35.768	34.293
		34.535	34.882	35.555	34.764		35.742	35.765	34.298
		34.483	34.86	35.551	34.772		35.739	35.759	34.307
		34.446	34.858	35.592	34.799		35.738	35.734	34.313
		34.413	34.869	35.593	34.796		35.735	35.7	34.318
		34.384	34.885	35.588	34.746		35.722	35.707	34.32
		34.36	34.902	35.582	34.705		35.722	35.713	34.316
		34.346	34.914	35.574	34.673		35.706	35.728	34.311
		34.329	34.911	35.567	34.653		35.704	35.743	34.319
		34.318	34.903	35.56	34.636		35.687	35.719	34.345
		34.318	34.906	35.546	34.619		35.681	35.726	34.361
		34.312	34.908	35.521	34.61		35.658	35.726	34.377
		34.305	34.885	35.474	34.597		35.647	35.73	34.376
		34.305	34.91	35.443	34.634		35.627	35.738	34.405
		34.302	34.924	35.4	34.919		35.621	35.731	34.591
		34.307	34.923	35.336	35.096		35.607	35.716	34.73
		34.315	34.917	35.317	35.16		35.589	35.706	34.83
		34.329	34.91	35.308	35.197		35.613	35.688	34.894
		34.355	34.897	35.331	35.204		35.616	35.689	34.933
		34.308	34.891	35.321	35.208		35.605	35.685	34.952
		34.271	34.874	35.308	35.207		35.603	35.668	34.964
		34.257	34.883	35.32	35.22		35.555	35.685	34.973
		34.273	34.881	35.404	35.306		35.527	35.67	34.975
		34.288	34.886	35.451	35.325		35.505	35.679	35
		34.279	34.876	35.457	35.33		35.483	35.691	35.027
		34.298	34.879	35.495	35.325		35.461	35.697	35.054
		34.384	34.891	35.537	35.305		35.454	35.701	35.063
		34.419	34.887	35.536	35.299		35.449	35.696	35.071
		34.404	34.895	35.531	35.291		35.455	35.701	35.073
		34.427	34.842	35.501	35.217		35.46	35.689	35.085
		34.396	34.846	35.506	35.14		35.448	35.691	35.096
		34.37	34.825	35.573	35.05		35.442	35.689	35.093
		34.441	34.817	35.604	34.982		35.438	35.68	35.092
		34.489	34.826	35.586	34.932		35.434	35.662	35.083
		34.4	34.834	35.635	34.898		35.439	35.645	35.068
		34.379	34.815	35.674	34.845		35.42	35.633	34.916
		34.348	34.822	35.731	34.805		35.419	35.616	34.763
		34.336	34.813	35.723	34.778		35.411	35.606	34.648
		34.313	34.81	35.694	34.769		35.416	35.608	34.574
		34.418	34.817	35.706	34.709		35.423	35.593	34.519
		34.501	34.804	35.74	34.682		35.432	35.599	34.479
		34.458	34.81	35.726	34.741		35.446	35.592	34.461
		34.39	35.074	35.715	34.779		35.441	35.571	34.456
		34.405	35.042	35.747	34.782		35.453	35.598	34.444
		34.421	35.002	35.757	34.794		35.458	35.586	34.436
		34.399	34.958	35.782	34.803		35.455	35.579	34.433
		34.375	34.933	35.776	34.798		35.46	35.573	34.437
		34.334	34.94	35.838	34.803		35.456	35.594	34.432
		34.333	34.928	35.944	34.801		35.451	35.653	34.426
		34.385	34.889	35.977	34.825		35.443	35.802	34.425
		34.401	34.971	36.038	34.841		35.415	35.848	34.431
		34.333	35.036	35.99	34.877		35.404	35.945	34.435
		34.315	35.049	35.954	34.914		35.374	35.962	34.447
		34.34	35.063	35.936	34.943		35.352	35.939	34.438
		34.369	35.063	35.921	35.002		35.334	35.837	34.389
		34.326	35.057	35.977	34.966		35.319	35.769	34.352
		34.253	35.051	36.058	34.994		35.304	35.744	34.339
		34.212	35.026	36.04	35.011		35.309	35.748	34.34
		34.279	35.011	36.014	35.007		35.312	35.759	34.328
		34.441	35.062	35.983	35		35.31	35.762	34.317
		34.498	35.062	36.013	34.975		35.336	35.761	34.3
		34.526	35.106	36.031	34.991		35.407	35.783	34.281
		34.564	35.112	36.062	34.993		35.443	35.77	34.266
		34.616	35.141	36.079	34.967		35.46	35.773	34.273
		34.662	35.18	36.146	34.949		35.483	35.76	34.286
		34.729	35.219	36.194	34.918		35.489	35.833	34.262
		34.678	35.224	36.232	34.908		35.492	35.948	34.239
		34.578	35.215	36.188	34.889		35.497	35.915	34.224
		34.691	35.187	36.188	34.871		35.506	35.911	34.195
		34.738	35.242	36.162	34.855		35.501	35.952	34.17
		34.69	35.345	36.138	34.852		35.494	35.927	34.167
		34.708	35.29	36.133	34.844		35.489	35.94	34.166
		34.708	35.377	36.117	34.839		35.478	35.862	34.158
		34.605	35.555	36.126	34.838		35.472	36.001	34.146
		34.565	35.645	36.142	34.824		35.479	36.027	34.134
		34.495	35.667	36.13	34.783		35.483	36.029	34.128
		34.505	35.608	36.168	34.768		35.435	35.995	34.136
		34.489	35.598	36.165	34.749		35.405	35.962	34.193
		34.46	35.599	36.148	34.745		35.438	35.91	34.201
		34.516	35.584	36.188	34.709		35.476	35.894	34.201
		34.647	35.652	36.189	34.693		35.587	35.881	34.2

## Sheet: CRF&CORT, heart rate, temperatu
time	Vehicle					CNO (3 mg/kg)
	34.603	35.334	36.157	37.024		34.798	36	35.54	36.247	35.128	34.647
	34.587	35.306	36.155	37.067		34.855	36.073	35.537	36.277	35.069	34.777
	34.59	35.234	36.155	37.1		34.87	36.145	35.544	36.262	34.993	37.153
	34.596	35.186	36.152	37.056		34.789	36.201	35.537	36.253	34.947	34.738
	34.611	35.147	36.149	36.976		34.729	36.306	35.538	36.275	34.91	34.726
	34.6	35.124	36.16	37.004		34.654	36.33	35.538	36.276	34.876	34.659
	34.609	35.241	36.138	36.982		34.569	36.237	35.541	36.25	34.837	34.598
	34.573	35.365	36.136	36.928		34.521	36.175	35.536	36.265	34.816	34.582
	34.612	35.588	36.146	36.933		34.511	36.273	35.533	36.233	34.773	34.604
	34.66	35.603	36.143	36.979		34.762	36.334	35.531	36.243	34.693	34.698
	35.002	35.672	36.156	37.026		35.053	36.277	35.534	36.258	34.66	34.812
	35.488	35.738	36.165	36.952		35.242	36.102	35.514	36.24	34.652	34.889
	35.826	35.671	36.156	36.985		35.376	35.954	35.513	36.246	34.651	34.939
	36.022	35.583	36.101	36.971		35.447	35.838	35.518	36.253	34.642	34.966
	36.154	35.588	36.052	36.991		35.502	35.73	35.525	36.247	34.633	35.037
	36.132	35.68	36.014	36.935		35.547	35.604	35.535	36.222	34.635	35.09
	35.967	35.644	36.02	36.921		35.572	35.54	35.538	36.188	34.636	35.122
	35.829	35.672	36.074	36.954		35.585	35.448	35.544	36.17	34.643	35.15
	35.85	35.679	36.121	36.998		35.586	35.385	35.547	36.145	34.651	35.152
	36.057	35.626	36.114	36.958		35.605	35.354	35.57	36.121	34.659	35.113
	36.169	35.575	36.012	36.992		35.6	35.329	35.567	36.092	34.674	35.102
	36.056	35.57	35.895	36.981		35.6	35.262	35.574	36.063	34.694	35.095
	35.842	35.531	35.813	36.946		35.535	35.22	35.587	36.061	34.688	35.08
	35.641	35.284	35.778	36.941		35.549	35.217	35.597	36.065	34.683	35.072
	35.475	35.074	35.75	36.936		35.574	35.192	35.604	36.069	34.651	35.091
	35.373	34.935	35.726	36.917		35.584	35.181	35.606	36.072	34.641	35.096
	35.264	34.85	35.694	36.966		35.574	35.177	35.595	36.06	34.671	35.11
	35.161	34.804	35.684	36.982		35.58	35.212	35.596	36.056	34.726	35.12
	35.071	34.778	35.678	36.964		35.463	35.28	35.601	36.051	34.777	35.102
	35.013	34.79	35.667	36.949		35.314	35.383	35.596	36.045	34.821	35.081
	35.02	34.803	35.662	36.954		35.177	35.513	35.595	36.045	34.848	35.065
	34.863	34.805	35.665	36.954		35.057	35.582	35.631	36.038	35.035	35.041
	34.68	34.808	35.668	36.931		35.005	35.65	35.652	36.013	35.18	35.017
	34.538	34.825	35.678	36.899		34.965	35.769	35.655	36.001	35.257	35.005
	34.385	34.833	35.673	36.868		34.928	35.841	35.658	36.012	35.302	34.99
	34.438	34.9	35.675	36.834		34.896	35.909	35.664	36.021	35.342	34.99
	34.411	34.968	35.676	36.805		34.859	35.964	35.666	36.02	35.372	35.001
	34.388	35.016	35.683	36.822		34.853	35.92	35.673	36.021	35.401	35.004
	34.285	35.047	35.687	36.833		34.838	35.887	35.67	36.035	35.42	35.008
	34.267	35.067	35.699	36.832		34.824	35.884	35.67	36.102	35.439	35.011
	34.202	35.076	35.704	36.814		34.82	35.871	35.669	36.079	35.449	35.02
	34.146	35.085	35.704	36.807		34.786	35.891	35.653	36.077	35.459	35.044
	34.101	35.09	35.703	36.786		34.745	35.903	35.674	36.077	35.458	35.03
	34.228	35.068	35.711	36.778		34.738	35.907	35.727	36.09	35.463	35.004
	34.326	35.044	35.711	36.754		34.7	35.93	35.737	36.094	35.472	34.929
	34.4	35.062	35.712	36.732		34.718	35.961	35.675	36.1	35.477	34.92
	34.48	35.054	35.731	36.702		34.68	35.985	35.615	36.094	35.434	34.937
	34.518	35.036	35.742	36.658		34.646	35.995	35.612	36.11	35.402	35.102
	34.571	35.008	35.756	36.68		34.639	36.031	35.729	36.099	35.329	35.251
	34.572	34.915	35.765	36.688		34.637	36.047	35.813	36.091	35.331	35.111
	34.596	34.815	35.777	36.713		34.64	36.03	35.804	36.101	35.391	35.081
	34.486	35.066	35.79	36.753		34.645	36.052	35.774	36.068	35.391	35.042
	34.883	35.188	35.8	36.786		34.656	36.063	35.804	36.036	35.324	34.988
	35.083	35.287	35.805	36.836		34.672	36.062	35.869	36.048	35.247	34.986
	35.183	35.25	35.83	36.87		34.696	36.046	35.92	36.101	35.216	34.948
	35.066	35.165	35.84	36.886		34.686	36.052	35.947	36.106	35.203	34.902
	34.886	35.105	35.842	36.929		34.682	36.089	35.899	36.101	35.222	34.883
	34.749	35.044	35.852	36.939		34.683	36.094	35.903	36.074	35.182	34.889
	34.609	34.923	35.867	36.948		34.726	36.113	35.904	36.043	35.09	34.897
	34.476	34.839	35.878	36.94		34.756	36.127	35.912	36.168	34.942	34.909
	34.385	34.864	35.891	36.939		34.783	36.153	35.986	36.188	34.902	34.92
	34.317	34.842	35.892	36.987		34.874	36.183	35.975	36.221	34.899	34.935
	34.263	34.801	35.898	37.081		34.98	36.167	35.944	36.23	34.954	35.074
	34.228	34.757	35.876	37.118		35.069	36.131	35.915	36.227	35.039	35.459
	34.203	34.838	35.879	37.102		35.127	36.128	35.849	36.237	35.11	35.671
	34.179	34.837	35.886	37.125		35.172	36.121	35.813	36.256	35.175	35.759
	34.166	34.776	35.881	37.117		35.206	36.115	35.828	36.266	35.228	35.732
	34.157	34.719	35.868	37.097		35.217	36.15	35.877	36.285	35.255	35.525
	34.15	34.672	35.871	37.07		35.233	36.142	35.875	36.292	35.219	35.271
	34.143	34.648	35.867	37.119		35.285	36.153	35.899	36.289	35.174	35.048
	34.133	34.633	35.852	37.106		35.326	36.184	35.86	36.296	35.15	34.916
	34.146	34.632	35.847	37.16		35.354	36.16	35.835	36.302	35.145	34.865
	34.138	34.636	35.842	37.194		35.405	36.123	35.827	36.28	35.147	34.845
	34.147	34.624	35.826	37.215		35.451	36.099	35.795	36.283	35.155	34.877
	34.147	34.654	35.83	37.262		35.485	36.088	35.869	36.283	35.165	34.909
	34.151	34.676	35.823	37.228		35.534	36.078	35.916	36.226	35.189	34.935
	34.142	34.69	35.825	37.232		35.571	36.057	35.959	36.139	35.202	34.951
	34.131	34.698	35.821	37.234		35.592	36.048	35.91	36.091	35.205	34.961
	34.129	34.698	35.83	37.259		35.616	36.044	35.856	36.063	35.224	34.965
	34.194	34.681	35.835	37.242		35.631	36.034	35.808	36.036	35.288	34.968
	34.288	34.698	35.826	37.191		35.643	36.034	35.775	35.992	35.308	34.974
	34.42	34.769	35.829	37.127		35.657	36.028	35.726	35.963	35.322	34.973
	34.491	34.837	35.828	37.07		35.69	36.014	35.676	35.907	35.329	35.018
	34.504	34.879	35.816	36.996		35.719	36.034	35.615	35.895	35.337	35.064
	34.507	34.952	35.777	36.952		35.756	36.047	35.553	35.902	35.335	35.1
	34.537	35.096	35.742	36.903		35.781	36.081	35.505	35.893	35.33	35.12
	34.546	35.062	35.76	36.86		35.79	36.081	35.471	35.904	35.32	35.143
	34.533	35.016	35.794	36.821		35.81	36.082	35.447	35.896	35.314	35.17
	34.5	34.981	35.824	36.822		35.844	36.053	35.426	35.903	35.319	35.166
	34.473	34.962	35.852	36.812		35.835	36.058	35.413	35.91	35.302	35.368
	34.443	34.953	35.858	36.789		35.84	36.055	35.395	35.911	35.289	35.533
	34.385	34.958	35.879	36.8		35.784	36.045	35.383	35.908	35.278	35.638
	34.482	34.97	35.875	36.787		35.713	36.038	35.37	35.919	35.268	35.709
	34.489	34.932	35.886	36.76		35.648	36.034	35.371	35.913	35.268	35.75
	34.482	34.904	35.859	36.73		35.633	36.03	35.36	35.917	35.269	35.775
	34.507	34.899	35.889	36.713		35.574	36.027	35.362	35.904	35.288	35.801
	34.443	34.902	35.913	36.682		35.525	36.041	35.349	35.917	35.307	35.811
	34.435	34.906	35.916	36.654		35.499	36.101	35.347	35.951	35.314	35.791
	34.439	34.909	35.927	36.622		35.477	36.182	35.345	35.935	35.295	35.675
	34.466	34.927	35.931	36.606		35.455	36.223	35.349	35.928	35.28	35.583
	34.488	34.96	35.928	36.632		35.462	36.216	35.344	35.917	35.26	35.495
	34.445	34.988	35.923	36.638		35.44	36.241	35.346	35.926	35.242	35.452
	34.431	35.009	35.923	36.645		35.421	36.247	35.348	35.944	35.216	35.424
	34.432	35.064	35.921	36.64		35.42	36.291	35.348	35.949	35.2	35.413
	34.44	35.086	35.917	36.634		35.411	36.285	35.348	35.964	35.187	35.399
	34.439	35.07	35.916	36.609		35.43	36.381	35.346	35.958	35.18	35.398
	34.421	35.01	35.935	36.621		35.404	36.34	35.339	35.971	35.169	35.384
	34.489	34.929	35.936	36.636		35.384	36.248	35.34	35.979	35.167	35.357
	34.507	34.928	35.946	36.657		35.696	36.1	35.34	35.989	35.156	35.344
	34.536	34.98	35.936	36.649		34.963	35.986	35.335	35.998	35.142	35.33
	34.586	35.044	35.921	36.611		35.03	35.885	35.327	35.998	35.146	35.319
	34.645	35.057	35.907	36.61		35.277	35.82	35.343	36.016	35.156	35.266
	34.597	35.059	35.891	36.62		35.239	35.81	35.37	36.03	35.159	35.168
	34.635	35.147	35.869	36.628		35.322	35.785	35.34	36.023	35.152	35.018
	34.684	35.235	35.868	36.637		35.36	35.814	35.294	36.023	35.159	34.896
	34.668	35.185	35.864	36.625		35.4	35.803	35.291	36.015	35.164	34.829
	34.686	35.112	35.855	36.62		35.379	35.815	35.343	36.044	35.215	34.796
	34.597	35.037	35.845	36.627		35.354	35.807	35.32	36.104	35.243	34.782
	34.548	34.989	35.867	36.617		35.396	35.833	35.336	36.127	35.266	34.773
	34.505	34.978	35.879	36.605		35.453	35.854	35.31	36.182	35.272	34.767
	34.47	34.995	35.877	36.589		35.498	35.873	35.301	36.183	35.338	34.772
	34.355	34.932	35.9	36.575		35.423	35.875	35.29	36.223	35.47	34.774
	34.27	34.874	35.915	36.542		35.484	35.868	35.279	36.25	35.544	34.779
	34.248	34.813	35.928	36.548		35.406	35.873	35.278	36.239	35.609	34.781
	34.207	34.753	35.953	36.572		35.283	35.963	35.265	36.221	35.687	34.787
	34.144	34.749	35.952	36.596		35.164	36.005	35.259	36.21	35.712	34.798
	34.152	34.754	35.937	36.59		35.098	36.025	35.251	36.195	35.698	34.809
	34.08	34.76	35.94	36.591		35.039	36.026	35.235	36.191	35.59	34.817
	34.051	34.726	35.942	36.605		34.978	36.063	35.228	36.175	35.46	34.823
	34.013	34.717	35.93	36.641		34.955	36.073	35.195	36.178	35.379	34.825
	33.941	34.835	35.933	36.651		34.904	36.07	35.177	36.174	35.297	34.827
	34.072	34.925	35.93	36.641		35.011	36.076	35.204	36.148	35.248	34.824
	34.217	35.042	35.913	36.621		35.146	36.08	35.215	36.147	35.297	34.821
	34.25	35.177	35.903	36.594		35.291	36.127	35.234	36.152	35.291	34.822
	34.332	35.164	35.905	36.558		35.326	36.141	35.228	36.143	35.213	34.819
	34.39	35.233	35.925	36.54		35.36	36.123	35.227	36.146	35.103	34.822
	34.478	35.175	35.942	36.501		35.404	36.059	35.227	36.128	35.032	34.829
	34.544	35.164	35.953	36.476		35.422	36.034	35.225	36.12	34.995	34.838
	34.519	35.119	35.949	36.482		35.397	36.008	35.247	36.116	34.926	34.851
	34.605	35.067	35.948	36.488		35.378	35.984	35.242	36.058	34.868	34.872
	34.638	35.015	35.945	36.478		35.47	35.953	35.276	36.028	34.807	34.918
	34.623	34.986	35.969	36.504		35.356	35.934	35.263	36.043	34.787	34.96
	34.667	35.044	35.979	36.532		35.234	35.927	35.263	36.068	34.855	34.993
	34.758	35.211	35.976	36.517		35.275	35.906	35.252	36.071	34.866	35.009
	34.717	35.305	36.016	36.484		35.265	35.891	35.245	36.057	34.784	35.021
	34.755	35.277	35.993	36.472		35.302	35.856	35.242	36.048	34.795	35.027
	34.75	35.252	36.086	36.457		35.346	35.832	35.231	36.048	34.784	35.026
	34.736	35.218	36.148	36.416		35.416	35.843	35.222	36.019	34.854	35.026
	34.796	35.226	36.153	36.385		35.414	35.819	35.225	36.016	34.846	35.023
	34.832	35.226	36.127	36.343		35.399	35.755	35.217	35.994	34.938	35.017
	34.862	35.291	36.077	36.323		35.577	35.721	35.203	35.994	35.041	34.983
	34.881	35.49	36.005	36.353		35.586	35.698	35.19	35.999	35.252	34.89
	34.869	35.407	35.974	36.371		35.542	35.712	35.191	36.013	35.356	34.99
	34.815	35.551	36.004	36.382		35.496	35.748	35.149	36.038	35.354	34.993
	34.797	35.659	36.126	36.386		35.452	35.793	35.249	36.041	35.433	34.993
	34.763	35.756	36.341	36.435		35.405	35.743	35.294	36.04	35.399	34.99
	34.665	35.865	36.417	36.465		35.468	35.72	35.312	36.042	35.358	35.003
	34.634	35.913	36.589	36.47		35.458	35.67	35.284	36.055	35.283	35.013
	34.543	35.855	36.613	36.434		35.447	35.638	35.222	36.069	35.247	35.015
	34.477	35.756	36.503	36.431		35.422	35.594	35.169	36.076	35.25	35.02
	34.434	35.792	36.377	36.464		35.405	35.565	35.112	36.082	35.263	35.02
	34.385	35.908	36.37	36.497		35.515	35.532	35.121	36.082	35.264	34.747
	34.325	35.969	36.367	36.515		35.552	35.524	35.172	36.083	35.241	34.905
	34.231	36.034	36.278	36.527		35.494	35.517	35.179	36.084	35.202	34.838
	34.234	36.049	36.214	36.541		35.472	35.55	35.163	36.063	35.141	35.031
	34.213	36.002	36.159	36.579		35.469	35.507	35.17	36.045	35.143	35.036
	34.238	35.998	36.148	36.528		35.603	35.52	35.181	36.014	35.174	35.034
	34.203	36.076	36.181	36.486		35.525	35.548	35.175	36.003	35.132	35.035
	34.182	36.116	36.209	36.459		35.563	35.516	35.199	35.998	35.117	35.037
	34.155	36.136	36.198	36.443		35.66	35.531	35.198	35.998	35.149	35.032
	34.128	36.089	36.21	36.413		35.734	35.605	35.222	35.987	35.161	35.032
	34.143	36.042	36.24	36.421		35.745	35.62	35.231	35.977	35.193	34.994
	34.204	36.065	36.206	36.435		35.841	35.669	35.233	35.968	35.169	35.138
	33.938	36.117	36.133	36.454		35.951	35.715	35.307	35.931	35.171	35.221
	34.483	36.081	36.168	36.527		35.924	35.728	35.361	35.902	35.214	35.252
	34.639	36.079	36.253	36.568		35.947	35.746	35.393	35.877	35.194	35.28
	34.723	36.031	36.231	36.574		35.878	35.741	35.422	35.863	35.208	35.313
	34.804	35.979	36.306	36.583		35.827	35.75	35.615	35.84	35.259	35.349
	34.829	36.022	36.417	36.637		35.869	35.742	35.729	35.836	35.274	35.375
	34.825	36.124	36.488	36.636		35.895	35.739	35.773	35.824	35.282	35.401
	34.855	36.222		36.545		35.918	35.717	35.762	35.825	35.288	35.422
	35.006	36.245	36.596	36.392		35.931	35.597	35.705	36.676	35.231	35.445
	34.955	36.263	36.65	36.775		35.989	35.703	35.756	35.889	34.644	35.468
	34.942	36.308	36.695	36.755		35.936	35.784	35.834	36.063	35.054	35.482
	35.024	36.325	36.748	36.819		35.763	35.778	35.887	35.94	35.028	35.494
	35.132	36.316	36.784	36.865		35.611	35.674	35.89	35.879	35.099	35.502
	35.226	36.302	36.715	36.886		35.496	35.613	35.915	35.94	35.15	35.503
	34.843	36.282	36.76	36.928		35.397	35.563	35.952	36.045	35.133	35.523
	35.391	36.245	36.818	36.916		35.326	35.579	35.934	36.118	35.135	35.431
	35.546	36.204	36.794	36.953		35.315	35.61	35.884	36.195	35.236	35.306
	35.535	36.166	36.823	36.958		35.392	35.573	35.853	36.182	35.184	35.235
	35.657	36.111	36.833	36.963		35.399	35.599	35.924	36.272	35.183	35.194
	35.34	36.087	36.814	36.97		35.361	35.596	35.952	36.178	35.314	35.192
	35.744	36.02	36.833	36.92		35.322	35.669	35.969	36.164	35.411	35.235
	35.795	35.975	36.831	36.938		35.301	35.725	35.999	36.4	35.443	35.243
	35.74	35.936	36.779	36.93		35.277	35.825	35.971	36.417	35.512	35.243
	35.661	35.916	36.779	36.977		35.213	35.834	36.043	36.454	35.499	35.241
	35.636	35.896	36.73	36.949		35.166	35.908	36.115	36.426	35.522	35.247
	35.459	35.876	36.714	36.931		35.194	35.949	36.131	36.477	35.48	35.253
	35.326	35.871	36.744	36.911		35.163	35.937	36.16	36.612	35.411	35.261
	35.308	35.857	36.844	36.945		35.187	35.878	36.232	36.621	35.431	35.273
	35.288	35.841	36.794	37.034		35.33	35.917	36.267	36.74	35.434	35.295
	35.248	35.834	36.851	37.099		35.237	35.803	36.294	36.806	35.417	35.301
	35.236	35.829	36.906	37.086		35.313	35.7	36.39	36.838	35.41	35.304
	35.111	35.818	36.903	37.091		35.564	35.725	36.461	36.921	35.39	35.31
	34.981	35.8	36.898	37.117		35.599	35.779	36.496	36.904	35.393	35.312
	35.047	35.781	36.913	37.125		35.575	35.853	36.502	36.875	35.453	35.311
	35.071	35.76	36.931	37.063		35.596	35.926	36.532	36.878	35.448	35.324
	35.047	35.736	36.922	37.081		35.566	36.04	36.546	36.857	35.34	35.336
	35.126	35.705	36.969	37.042		35.566	36.066	36.557	36.852	35.275	35.358
	35.252	35.707	37.04	37.004		35.569	36.134	36.565	36.848	35.289	35.336
	35.334	35.694	37.11	36.92		35.57	36.132	36.56	36.936	35.257	35.263
	35.277	35.678	37.121	36.878		35.647	36.117	36.628	36.962	35.199	35.159
	35.281	35.671	37.13	36.834		35.628	36.127	36.661	36.984	35.146	35.067
	35.406	35.662	37.087	36.793		35.62	36.281	36.644	36.98	35.156	35.001
	35.483	35.648	37.037	36.768		35.613	36.509	36.633	36.958	35.187	34.962
	35.433	35.641	36.955	36.734		35.624	36.701	36.629	36.94	35.155	34.926
	35.511	35.656	36.904	36.706		35.626	36.826	36.636	36.895	35.181	34.896
	35.617	35.675	36.871	36.659		35.672	36.824	36.669	36.867	35.273	34.875
	35.644	35.681	36.799	36.644		35.673	36.761	36.665	36.886	35.225	34.872
	35.539	35.689	36.744	36.621		35.7	36.8	36.646	36.922	35.16	34.868
	35.342	35.688	36.698	36.588		35.719	36.646	36.678	36.927	35.161	34.865
	35.198	35.691	36.684	36.559		35.792	36.429	36.658	37.029	35.219	34.866
	35.227	35.688	36.658	36.532		35.853	36.238	36.638	37.028	35.237	34.876
	35.23	35.687	36.633	36.516		35.852	36.094	36.602	37.068	35.349	34.884
	35.185	35.688	36.603	36.491		35.995	35.985	36.653	37.095	35.423	34.895
	35.18	35.697	36.578	36.465		36.19	35.895	36.681	37.092	35.402	34.897
	35.151	35.694	36.565	36.445		36.402	35.833	36.667	37.075	35.349	34.912
	35.126	35.693	36.553	36.426		36.37	35.785	36.671	37.083	35.298	34.932
	35.306	35.692	36.528	36.4		36.199	35.74	36.647	37.062	35.135	34.946
	35.703	35.693	36.5	36.407		36.014	35.785	36.69	36.908	34.997	34.971
	36.15	35.688	36.473	36.449		35.841	35.837	36.68	36.832	34.987	34.981
	36.431	35.692	36.446	36.466		35.662	35.877	36.693	36.851	34.981	35.001
	36.627	35.691	36.41	36.458		35.487	35.977	36.617	36.894	34.971	35.028
	36.479	35.692	36.369	36.462		35.335	35.998	36.589	36.938	34.891	35.053
	36.144	35.731	36.338	36.451		35.235	35.898	36.595	36.991	34.736	35.072
	35.811	35.765	36.301	36.453		35.132	35.988	36.593	37.075	34.642	35.095
	35.513	35.767	36.259	36.435		35.054	35.994	36.604	37.097	34.586	35.101
	35.343	35.783	36.253	36.431		34.978	36.023	36.617	37.063	34.579	35.109
	35.116	35.806	36.246	36.406		34.918	36.037	36.614	36.988	34.656	35.121
	34.876	35.832	36.225	36.459		34.875	36.085	36.646	36.971	34.856	35.14
	34.872	35.854	36.214	36.453		34.845	36.123	36.66	37.023	34.874	35.158
	34.77	35.881	36.227	36.434		34.817	36.136	36.741	37.016	34.757	35.157
	34.691	35.904	36.221	36.415		34.796	36.157	36.803	36.906	34.775	35.11
	34.592	35.926	36.211	36.394		34.798	36.166	36.79	36.904	34.808	35.077
	34.935	35.937	36.213	36.36		34.84	36.174	36.805	36.864	34.764	35.055
	34.912	35.947	36.206	36.345		34.891	36.185	36.825	36.824	34.709	35.046
	34.909	35.957	36.191	36.31		34.924	36.211	36.793	36.796	34.693	35.047
	34.884	35.974	36.193	36.295		34.957	36.208	36.816	36.804	34.766	35.065
	34.872	35.983	36.179	36.287		34.958	36.219	36.84	36.836	34.7	35.025
	34.872	35.989	36.179	36.267		34.965	36.237	36.848	36.893	34.689	34.946
	34.122	35.997	36.171	36.248		34.953	36.256	36.867	36.883	34.657	34.879
	34.406	36.006	36.162	36.244		34.96	36.277	36.857	36.913	34.63	34.823
	34.687	36.012	36.154	36.241		35.002	36.302	36.859	36.908	34.62	34.79
	34.832	36.012	36.149	36.236		35.028	36.318	36.862	36.864	34.61	34.769
	34.792	36.015	36.143	36.232		35.003	36.363	36.888	36.854	34.617	34.754
	34.691	36.014	36.137	36.228		34.998	36.381	36.876	36.872	34.61	34.743
	34.61	36.007	36.186	36.21		34.995	36.402	36.88	36.896	34.599	34.725
	34.526	36.013	36.223	36.193		34.983	36.429	36.881	36.912	34.558	34.705
	34.48	36.006	36.24	36.275		34.994	36.465	36.864	36.862	34.571	34.693
	34.426	35.958	36.292	36.305		35.014	36.475	36.81	36.869	34.565	34.686
	34.375	35.882	36.343	36.34		35.013	36.529	36.87	36.859	34.51	34.684
	34.35	35.795	36.376	36.379		35.021	36.576	36.904	36.87	34.416	34.707
	34.328	35.729	36.388	36.388		35.023	36.645	36.907	36.882	34.244	34.734
	34.301	35.691	36.399	36.396		35.041	36.684	36.926	36.894	34.146	34.756
	34.274	35.675	36.382	36.378		35.153	36.727	36.948	36.551	34.089	34.788
	34.227	35.758	36.379	36.358		35.23	36.778	36.921	36.887	34.073	34.827
	34.198	35.813	36.348	36.338		35.268	36.791	36.91	36.876	34.086	34.864
	34.145	35.857	36.34	36.314		35.303	36.828	36.882	36.878	34.111	34.891
	34.118	35.893	36.322	36.29		35.335	36.863	36.855	36.854	34.137	34.931
	34.049	35.922	36.309	36.269		35.367	36.882	36.849	36.89	34.153	34.947
	34.038	35.945	36.317	36.247		35.38	36.908	36.869	36.891	34.178	35.059
	34.001	35.979	36.304	36.228		35.398	36.946	36.837	36.872	34.207	35.122
	33.991	36.018	36.333	36.204		35.403	36.96	36.851	36.899	34.243	35.165
	33.986	36.025	36.352	36.18		35.416	36.962	36.834	36.916	34.286	35.166
	34.004	36.033	36.391	36.163		35.431	36.982	36.842	36.936	34.303	35.157
	34.035	36.024	36.424	36.132		35.442	37.002	36.88	36.961	34.324	35.073
	34.049	36.011	36.423	36.088		35.445	37.021	36.896	36.986	34.339	35.005
	34.06	35.996	36.428	36.048		35.45	37.037	36.911	37.014	34.346	34.964
	34.046	35.989	36.433	36.016		35.453	37.052	36.897	37.029	34.372	34.931
	34.054	35.961	36.553	35.984		35.454	37.079	36.946	37.056	34.446	34.936
	34.047	35.938	36.706	35.967		35.474	37.053	36.945	37.09	34.459	34.951
	34.06	35.928	36.839	35.947		35.497	37.016	36.925	37.079	34.428	34.963
	34.172	35.916	36.955	35.927		35.511	36.968	36.916	37.109	34.425	34.969
	34.242	35.897	37.012	35.915		35.557	36.954	36.887	37.148	34.464	34.969
	34.3	35.885	37.043	35.908		35.607	36.958	36.876	37.183	34.459	34.98
	34.303	35.886	37.081	35.894		35.643	36.962	36.834	37.212	34.423	34.998
	34.299	35.877	37.101	35.887		35.667	36.949	36.837	37.243	34.39	35.019
	34.268	35.871	37.054	36.015		35.738	36.923	36.85	37.262	34.366	35.031
	34.235	35.847	37.091	36.098		35.793	36.878	36.837	37.242	34.339	35.035
	34.28	35.864	37.134	36.091		35.84	36.835	36.826	37.211	34.313	34.973
	34.324	35.848	37.099	36.111		35.875	36.794	36.742	37.196	34.294	34.913
	34.359	35.825	37.027	36.109		35.911	36.762	36.677	37.203	34.278	34.901
	34.394	35.794	36.944	36.145		35.949	36.788	36.622	37.221	34.28	34.914
	34.426	35.782	36.891	36.168		35.965	36.803	36.597	37.225	34.388	34.93
	34.471	35.763	36.846	36.184		35.973	36.809	36.57	37.251	34.669	34.962
	34.594	35.745	36.869	36.22		35.99	36.851	36.547	37.275	34.741	34.985
	34.631	35.729	36.858	36.223		35.995	36.884	36.527	37.299	34.74	35.006
	34.622	35.702	36.826	36.212		35.984	36.889	36.508	37.323	34.767	35.029
	34.634	35.767	36.794	36.226		35.957	36.876	36.481	37.333	34.819	35.04
	34.646	35.813	36.762	36.229		35.913	36.86	36.497	37.355	34.892	35.054
	34.629	35.808	36.739	36.209		35.88	36.838	36.452	37.362	34.966	35.064
	34.66	35.815	36.717	36.188		35.869	36.841	36.397	37.386	34.953	35.079
	34.67	35.848	36.687	36.166		35.874	36.848	36.481	37.425	34.937	35.098
	34.655	35.858	36.659	36.15		35.882	36.849	36.595	37.448	34.929	35.111
	34.671	35.859	36.643	36.117		35.899	36.836	36.621	37.47	34.936	35.144
	34.747	35.843	36.623	36.087		35.883	36.818	36.595	37.49	34.952	35.176
	34.781	35.797	36.605	36.087		35.927	36.808	36.584	37.537	34.983	35.196
	34.825	35.753	36.594	36.074		35.951	36.834	36.633	37.563	35.018	35.211
	34.81	35.719	36.568	36.066		36.001	36.841	36.648	37.585	35.042	35.222
	34.775	35.733	36.548	36.116		35.991	36.828	36.613	37.597	35.06	35.229
	34.765	35.76	36.524	36.191		36.065	36.811	36.606	37.62	35.148	35.242
	34.758	35.752	36.51	36.203		36.081	36.805	36.613	37.64	35.207	35.259
	34.695	35.694	36.486	36.194		36.072	36.806	36.611	37.651	35.225	35.26
	34.688	35.605	36.468	36.169		36.064	36.812	36.65	37.657	35.22	35.247
	34.758	35.592	36.438	36.139		36.089	36.798	36.643	37.663	35.186	35.239
	34.809	35.573	36.401	36.136		36.081	36.803	36.619	37.678	35.146	35.242
	34.846	35.474	36.407	36.133		36.013	36.792	36.602	37.689	35.12	35.245
	34.821	35.398	36.398	36.109		35.978	36.784	36.58	37.702	35.109	35.249
	34.841	35.314	36.392	36.113		35.951	36.78	36.56	37.717	35.142	35.246
	34.865	35.312	36.389	36.102		35.917	36.753	36.561	37.756	35.144	35.248
	34.884	35.373	36.384	36.091		35.893	36.75	36.58	37.792	35.137	35.26
	34.93	35.455	36.384	36.1		35.876	36.759	36.614	37.984	35.127	35.262
	34.878	35.507	36.389	36.124		35.859	36.749	36.626	37.992	35.121	35.269
	34.897	35.543	36.398	36.137		35.847	36.748	36.65	37.937	35.128	35.273
	34.902	35.569	36.406	36.141		35.837	36.761	36.683	37.868	35.142	35.279
	34.909	35.587	36.406	36.18		35.835	36.784	36.71	37.795	35.157	35.286
	34.951	35.551	36.43	36.242		35.82	36.786	36.742	37.743	35.172	35.292
	34.929	35.5	36.436	36.321		35.827	36.782	36.765	37.687	35.18	35.296
	34.936	35.452	36.43	36.381		35.885	36.812	36.793	37.657	35.216	35.317
	34.916	35.361	36.443	36.457		35.925	36.832	36.821	37.598	35.251	35.322
	34.858	35.303	36.455	36.406		36.004	36.882	36.845	37.652	35.177	35.329
	34.891	35.254	36.464	36.342		36.061	36.941	36.871	37.671	35.055	35.329
	34.928	35.186	36.469	36.307		36.084	36.932	36.898	37.67	34.974	35.345
	34.92	35.142	36.47	36.209		36.107	36.975	36.93	37.643	34.906	35.306
	34.886	35.099	36.45	36.381		36.118	37.005	36.975	37.61	34.853	35.266
	34.9	35.112	36.433	36.509		36.129	36.994	37.008	37.591	34.808	35.248
	34.752	35.089	36.427	36.55		36.128	36.993	37.043	37.591	34.768	35.25
	34.689	35.189	36.433	36.574		36.123	36.976	37.056	37.6	34.742	35.261
	34.753	35.33	36.441	36.614		36.111	36.961	37.095	37.604	34.671	35.27
	34.73	35.366	36.447	36.614		36.102	36.949	37.122	37.611	34.615	35.284
	34.712	35.418	36.45	36.663		36.099	36.939	37.15	37.624	34.584	35.304
	34.779	35.487	36.441	36.635		36.099	36.933	37.186	37.622	34.564	35.328
	34.742	35.576	36.422	36.592		36.164	36.937	37.222	37.64	34.554	35.34
	34.729	35.57	36.409	36.631		36.25	36.941	37.243	37.669	34.553	35.371
	34.759	35.494	36.374	36.599		36.212	36.925	37.275	37.673	34.561	35.352
	34.755	35.476	36.388	36.563		36.237	36.925	37.308	37.676	34.569	35.369
	34.739	35.438	36.352	36.525		36.325	36.906	37.304	37.686	34.577	35.411
	34.713	35.401	36.349	36.575		36.345	36.904	37.324	37.692	34.624	35.456
	34.689	35.277	36.342	36.534		36.343	36.898	37.337	37.687	34.587	35.486
	34.74	35.218	36.352	36.529		36.241	36.905	37.364	37.685	34.483	35.499
	34.708	35.166	36.349	36.52		36.145	36.897	37.379	37.699	34.429	35.51
	34.661	35.15	36.364	36.493		36.161	36.884	37.405	37.715	34.431	35.514
	34.622	35.097	36.394	36.47		36.16	36.882	37.427	37.725	34.442	35.524
	34.574	35.029	36.411	36.435		36.168	36.884	37.423	37.733	34.496	35.563
	34.522	35.007	36.427	36.407		36.267	36.896	37.439	37.768	34.541	35.586
	34.466	34.997	36.44	36.383		36.211	36.943	37.454	37.808	34.571	35.603
	34.387	34.975	36.451	36.361		36.135	36.912	37.475	37.849	34.601	35.62
	34.341	35.022	36.465	36.338		36.074	36.912	37.489	37.863	34.638	35.712
	34.379	35.061	36.463	36.325		36.019	36.876	37.502	37.893	34.673	35.796
	34.445	35.078	36.459	36.311		35.982	36.843	37.511	37.898	34.712	35.869
	34.443	35.107	36.493	36.299		35.951	36.808	37.509	37.908	34.739	35.933
	34.421	35.203	36.523	36.255		35.941	36.785	37.542	37.869	34.783	35.982
	34.403	35.22	36.516	36.228		35.922	36.764	37.601	37.819	34.786	36.02
	34.385	35.211	36.531	36.227		35.923	36.74	37.621	37.784	34.779	36.054
	34.391	35.285	36.603	36.209		35.922	36.729	37.623	37.752	34.772	36.074
	34.406	35.282	36.64	36.197		35.93	36.719	37.627	37.714	34.78	36.093
	34.411	35.253	36.625	36.182		35.903	36.715	37.644	37.712	34.782	36.099
	34.433	35.271	36.585	36.175		35.877	36.725	37.655	37.726	34.769	36.097
	34.451	35.283	36.558	36.15		35.863	36.725	37.629	37.727	34.756	36.076
	34.473	35.258	36.552	36.122		35.86	36.741	37.593	37.723	34.746	36.061
	34.506	35.257	36.6	36.122		35.859	36.748	37.595	37.747	34.795	36.044
	34.52	35.239	36.645	36.118		35.852	36.805	37.601	37.744	34.846	36.047
	34.525	35.221	36.615	36.091		35.852	36.845	37.601	37.762	34.868	36.052
	34.54	35.191	36.697	36.122		35.82	36.886	37.609	37.784	34.888	36.052
	34.545	35.246	36.785	36.152		35.803	36.909	37.601	37.789	34.919	36.009
	34.606	35.213	36.809	36.154		35.801	36.946	37.574	37.79	34.955	35.962
	34.623	35.245	36.853	36.16		35.789	36.962	37.564	37.796	34.991	35.934
	34.65	35.246	36.919	36.146		35.772	36.961	37.548	37.811	35.006	35.917
	34.672	35.213	36.898	36.149		35.739	36.955	37.533	37.834	35.017	35.897
	34.712	35.166	36.886	36.122		35.695	36.955	37.538	37.852	35.04	35.873
	34.749	35.07	36.814	36.111		35.704	36.959	37.55	37.863	35.059	35.85
	34.765	35.271	36.861	36.07		35.721	36.96	37.574	37.878	35.099	35.887
	34.746	35.397	36.865	36.074		35.73	36.951	37.588	37.895	35.201	35.926
	34.732	35.379	36.86	36.062		35.75	36.949	37.599	37.9	35.255	35.947
	34.755	35.377	36.861	36.036		35.77	36.955	37.605	37.932	35.267	35.977
	34.761	35.339	36.737	36.027		35.776	36.966	37.604	37.939	35.262	35.984
	34.791	35.274	36.752	36		35.793	36.961	37.595	37.954	35.264	35.99
	34.803	35.286	36.764	35.943		35.801	36.962	37.596	37.982	35.261	36.001
	34.817	35.259	36.816	35.893		35.822	36.971	37.568	37.999	35.264	36.012
	34.84	35.207	36.713	35.839		35.843	36.969	37.553	38.019	35.262	36.027
	34.806	35.192	36.702	35.787		35.867	36.967	37.553	38.038	35.265	36.047
	34.788	35.192	36.793	35.738		35.884	36.951	37.544	38.066	35.265	36.065
	34.751	35.224	36.895	35.708		35.895	36.931	37.54	38.069	35.274	36.078
	34.726	35.208	36.925	35.686		35.916	36.903	37.552	38.071	35.279	36.094
	34.743	35.235	36.752	35.651		35.927	36.902	37.557	38.09	35.289	36.111
	34.779	35.195	36.638	35.649		35.944	36.889	37.553	38.119	35.3	36.13
	34.825	35.214	36.59	35.648		35.952	36.873	37.543	38.153	35.301	36.147
	34.838	35.247	36.514	35.647		35.955	36.862	37.536	38.189	35.304	36.16
	34.867	35.206	36.482	35.652		35.949	36.851	37.534	38.209	35.314	36.174
	34.879	35.241	36.446	35.651		35.932	36.836	37.529	38.232	35.33	36.185
	34.886	35.376	36.432	35.658		35.927	36.83	37.538	38.236	35.391	36.197
	34.884	35.487	36.41	35.658		35.908	36.831	37.542	38.264	35.453	36.212
	34.915	35.615	36.355	35.661		35.858	36.832	37.537	38.279	35.482	36.254
	34.935	35.707	36.302	35.661		35.883	36.835	37.542	38.288	35.469	36.301
	34.919	35.753	36.274	35.653		35.928	36.842	37.539	38.293	35.448	36.314
	34.984	35.797	36.273	35.649		35.932	36.875	37.548	38.309	35.449	36.295
	35.059	35.812	36.284	35.663		35.868	36.891	37.555	38.306	35.497	36.273
	35.04	35.81	36.324	35.652		35.807	36.9	37.569	38.31	35.549	36.257
	34.99	35.831	36.388	35.64		35.74	36.939	37.59	38.315	35.577	36.254
	34.947	35.792	36.361	35.644		35.683	36.952	37.617	38.31	35.604	36.25
	34.905	35.718	36.342	35.657		35.654	36.981	37.635	38.305	35.631	36.224
	34.823	35.649	36.369	35.663		35.614	37.008	37.654	38.298	35.663	36.211
	34.745	35.582	36.317	35.668		35.594	37.02	37.663	38.314	35.689	36.203
	34.71	35.512	36.286	35.671		35.588	37.01	37.68	38.317	35.712	36.218
	34.68	35.443	36.258	35.662		35.607	36.995	37.693	38.326	35.718	36.248
	34.657	35.488	36.251	35.656		35.568	36.991	37.716	38.342	35.689	36.262
	34.676	35.541	36.245	35.664		35.519	36.978	37.767	38.368	35.675	36.294
	34.689	35.508	36.263	35.755		35.575	36.966	37.768	38.386	35.688	36.339
	34.71	35.467	36.248	35.807		35.634	36.937	37.797	38.358	35.703	36.393
	34.686	35.403	36.25	35.819		35.756	36.92	37.756	38.319	35.71	36.436
	34.708	35.445	36.272	35.822		35.879	36.907	37.727	38.308	35.715	36.478
	34.717	35.397	36.278	35.817		35.983	36.923	37.717	38.308	35.719	36.529
	34.704	35.385	36.245	35.819		36.017	36.936	37.714	38.312	35.724	36.57
	34.661	35.353	36.289	35.813		35.985	36.949	37.723	38.314	35.732	36.554
	34.622	35.165	36.329	35.808		35.958	36.966	37.724	38.321	35.746	36.524
	34.548	35.07	36.43	35.789		35.914	37.012	37.733	38.328	35.768	36.504
	34.53	35.142	36.483	35.788		35.878	37.05	37.744	38.334	35.789	36.507
	34.499	35.196	36.48	35.773		35.842	37.081	37.748	38.345	35.785	36.525
	34.466	35.253	36.582	35.822		35.818	37.096	37.752	38.352	35.782	36.57
	34.432	35.314	36.723	35.806		35.799	37.112	37.734	38.348	35.774	36.606
	34.424	35.347	36.803	35.828		35.788	37.119	37.736	38.316	35.763	36.638
	34.428	35.293	36.881	35.83		35.779	37.096	37.737	38.279	35.76	36.656
	34.415	35.161	36.951	35.821		35.784	37.071	37.747	38.282	35.761	36.671
	34.403	34.993	36.956	35.805		35.798	37.049	37.759	38.288	35.745	36.684
	34.416	35.017	36.915	35.817		35.81	37.019	37.754	38.29	35.729	36.69
	34.392	35.083	36.916	35.823		35.805	36.989	37.771	38.295	35.719	36.681
	34.341	35.211	36.903	35.821		35.873	36.958	37.774	38.311	35.705	36.677
	34.373	35.3	36.904	35.914		35.953	36.929	37.769	38.328	35.699	36.693
	34.463	35.314	36.881	35.963		36.027	36.913	37.773	38.331	35.691	36.734
	34.559	35.275	36.853	35.998		36.083	36.898	37.777	38.341	35.682	36.769
	34.691	35.162	36.906	35.947		36.127	36.888	37.762	38.355	35.679	36.796
	34.733	35.065	36.996	36.008		36.173	36.89	37.785	38.375	35.672	36.814
	34.775	35.076	36.943	36.084		36.198	36.896	37.803	38.389	35.662	36.825
	34.741	35.097	36.796	36.14		36.215	36.916	37.817	38.395	35.656	36.83
	34.836	35.123	36.756	36.182		36.233	36.94	37.814	38.39	35.65	36.824
	34.808	35.103	36.811	36.203		36.205	36.965	37.854	38.363	35.653	36.793
	34.788	35.012	36.91	36.215		36.138	36.997	37.892	38.355	35.658	36.772
	34.765	34.976	36.996	36.214		36.065	37.032	37.89	38.381	35.654	36.738
	34.754	34.861	36.956	36.197		36.018	37.028	37.888	38.394	35.657	36.694
	34.711	34.78	36.914	36.157		36.022	37.023	37.877	38.423	35.66	36.66
	34.629	34.722	36.856	36.105		36.057	37.029	37.878	38.431	35.67	36.646
	34.615	34.689	36.791	36.085		36.098	37.032	37.876	38.454	35.701	36.649
	34.628	34.671	36.791	36.083		36.123	37.026	37.874	38.469	35.752	36.653
	34.638	34.671	36.794	36.141		36.156	37.015	37.874	38.519	35.805	36.651
	34.655	34.68	36.792	36.215		36.186	37.001	37.865	38.528	35.844	36.58
	34.616	34.731	36.747	36.237		36.227	36.991	37.87	38.532	35.878	36.495
	34.543	34.659	36.72	36.263		36.28	36.974	37.89	38.533	35.906	36.367
	34.472	34.636	36.692	36.3		36.32	36.953	37.903	38.53	35.927	36.245
	34.432	34.63	36.659	36.339		36.346	36.927	37.912	38.529	35.948	36.163
	34.373	34.619	36.637	36.364		36.371	36.92	37.912	38.526	35.962	36.122
	34.373	34.61	36.619	36.394		36.388	36.907	37.901	38.531	35.981	36.101
	34.356	34.613	36.59	36.424		36.403	36.873	37.9	38.536	35.993	36.105
	34.338	34.611	36.563	36.41		36.386	36.86	37.892	38.542	36.002	36.109
	34.322	34.614	36.515	36.463		36.377	36.855	37.875	38.556	36.01	36.117
	34.34	34.616	36.535	36.498		36.319	36.859	37.865	38.621	36.02	36.126
	34.312	34.619	36.53	36.513		36.309	36.855	37.867	38.686	36.03	36.135
	34.342	34.629	36.519	36.555		36.296	36.863	37.867	38.724	36.092	36.147
	34.425	34.644	36.499	36.541		36.214	36.882	37.866	38.712	36.169	36.155
	34.492	34.67	36.471	36.517		36.193	36.89	37.867	38.752	36.118	36.149
	34.552	34.689	36.46	36.584		36.212	36.888	37.877	38.732	36.048	36.141
	34.605	34.702	36.446	36.589		36.232	36.892	37.869	38.818	35.982	36.157
	34.649	34.711	36.437	36.589		36.261	36.896	37.868	38.813	35.97	36.162
	34.669	34.724	36.414	36.664		36.299	36.899	37.867	38.777	35.977	36.142
	34.708	34.741	36.389	36.595		36.31	36.909	37.862	38.739	36	36.123
	34.691	34.758	36.352	36.621		36.325	36.93	37.865	38.708	36.026	36.109
	34.667	34.768	36.326	36.502		36.322	36.934	37.912	38.693	36.047	36.087
	34.691	34.773	36.294	36.606		36.3	36.95	37.965	38.685	36.054	36.056
	34.687	34.779	36.224	36.615		36.301	36.953	37.98	38.667	36.067	36.03
	34.738	34.794	36.174	36.627		36.247	36.953	37.95	38.737	36.076	36.011
	34.713	34.789	36.142	36.619		36.189	36.944	37.931	38.736	36.085	36
	34.614	34.772	36.136	36.584		36.139	36.945	37.937	38.715	36.086	35.989
	34.477	34.764	36.133	36.63		36.091	36.922	37.939	38.679	36.094	35.987
	34.39	34.767	36.251	36.596		36.079	36.896	37.939	38.632	36.097	35.956
	34.332	34.773	36.317	36.619		36.072	36.822	37.954	38.63	36.087	35.926
	34.247	34.787	36.313	36.677		36.068	36.749	37.934	38.656	36.073	35.91
	34.188	34.791	36.314	36.654		36.046	36.708	37.92	38.673	36.065	35.914
	34.175	34.798	36.333	36.615		36.021	36.672	37.914	38.691	36.055	35.886
	34.189	34.804	36.341	36.653		36.041	36.636	37.935	38.706	36.042	35.813
	34.151	34.787	36.386	36.619		36.088	36.59	37.993	38.717	36.034	35.743
	34.131	34.748	36.424	36.709		36.115	36.567	38.008	38.735	36.029	35.703
	34.088	34.728	36.46	36.786		36.105	36.548	37.984	38.764	36.023	35.691
	34.049	34.744	36.481	36.855		36.106	36.572	38.001	38.773	36.018	35.676
	34.017	34.745	36.491	36.909		36.122	36.569	38.015	38.791	36.009	35.668
	34.068	34.745	36.526	36.928		36.139	36.587	38.022	38.775	35.981	35.676
	34.046	34.742	36.563	36.92		36.132	36.602	38.057	38.758	35.944	35.698
	34.005	34.741	36.573	36.911		36.139	36.61	38.058	38.722	35.945	35.827
	33.977	34.764	36.566	36.85		36.15	36.622	38.058	38.619	35.947	35.866
	33.955	34.812	36.544	36.742		36.165	36.629	38.027	38.494	35.922	35.881
	33.948	34.891	36.519	36.663		36.184	36.631	38.004	38.388	35.901	35.909
	33.913	34.968	36.476	36.629		36.206	36.648	38.006	38.302	35.899	35.938
	33.982	35.034	36.486	36.597		36.22	36.662	38.02	38.234	35.902	35.957
	34.082	35.062	36.518	36.546		36.23	36.669	38.026	38.196	35.91	35.973
	34.169	35.094	36.629	36.507		36.213	36.672	37.977	38.17	35.92	35.978
	34.242	35.138	36.684	36.462		36.197	36.696	37.963	38.15	35.924	35.976
	34.389	35.151	36.657	36.417		36.182	36.715	37.949	38.131	35.927	35.988
	34.582	35.106	36.683	36.377		36.168	36.726	37.923	38.124	35.933	36.001
	34.435	35.073	36.669	36.35		36.158	36.734	37.896	38.148	35.938	36.024
	34.647	35.027	36.599	36.338		36.151	36.708	37.884	38.203	35.952	36.006
	34.712	34.978	36.469	36.302		36.144	36.679	37.863	38.233	35.96	35.993
	34.763	34.958	36.388	36.289		36.147	36.656	37.872	38.257	35.98	35.995
	34.803	34.93	36.384	36.257		36.133	36.642	37.86	38.284	35.999	36.003
	34.826	34.895	36.312	36.247		36.138	36.635	37.852	38.302	36.009	36.013
	34.93	34.875	36.236	36.221		36.169	36.619	37.868	38.323	36.023	36.025
	35.001	34.875	36.203	36.203		36.201	36.604	37.883	38.339	36.039	35.995
	35.027	34.937	36.241	36.166		36.229	36.604	37.893	38.349	36.051	35.983
	35.043	34.937	36.228	36.136		36.281	36.602	37.896	38.363	36.065	35.985
	35.044	34.936	36.262	36.127		36.366	36.589	37.917	38.37	36.073	35.995
	34.996	34.889	36.26	36.114		36.459	36.59	37.932	38.376	36.089	36.005
	34.865	34.827	36.24	36.106		36.496	36.592	37.94	38.386	36.112	35.993
	34.751	34.769	36.28	36.093		36.543	36.597	37.944	38.395	36.107	36.009
	34.69	34.724	36.238	36.078		36.565	36.598	37.951	38.401	36.073	36.022
	34.79	34.739	36.352	36.075		36.595	36.599	37.966	38.401	36.058	36.042
	34.84	34.793	36.494	36.067		36.604	36.6	37.97	38.416	36.048	36.162
	34.864	34.826	36.523	36.057		36.603	36.61	37.957	38.426	36.034	36.275
	34.929	34.85	36.547	36.045		36.584	36.614	37.941	38.431	36.032	36.354
	35.038	34.872	36.417	36.038		36.556	36.614	37.942	38.435	36.025	36.412
	34.917	34.886	36.383	36.038		36.537	36.609	37.931	38.447	36.017	36.464
	34.941	34.897	36.345	36.03		36.533	36.612	37.952	38.45	36.029	36.49
	35.149	34.991	36.468	36.025		36.514	36.61	37.984	38.457	36.045	36.521
	35.281	35.022	36.435	36.027		36.511	36.607	37.999	38.457	36.023	36.558
	35.218	34.987	36.369	36.111		36.523	36.602	38.024	38.46	35.982	36.612
	35.047	34.945	36.331	36.156		36.526	36.603	38.028	38.463	35.947	36.665
	34.986	34.925	36.354	36.148		36.518	36.607	38.031	38.463	35.948	36.718
	34.93	34.926	36.486	36.129		36.531	36.613	38.04	38.464	35.967	36.746
	34.837	34.921	36.556	36.11		36.549	36.603	38.054	38.467	35.987	36.777
	34.764	34.908	36.522	36.103		36.558	36.608	38.073	38.469	36.002	36.8
	34.661	34.892	36.519	36.092		36.571	36.604	38.1	38.461	36.036	36.821
	34.563	34.881	36.602	36.079		36.547	36.602	38.102	38.462	36.194	36.83
	34.465	34.868	36.635	36.075		36.505	36.594	38.105	38.461	36.306	36.813
	34.408	34.865	36.749	36.065		36.48	36.587	38.108	38.467	36.338	36.657
	34.35	34.892	36.885	36.059		36.485	36.592	38.118	38.466	36.398	36.462
	34.31	34.929	37.033	36.039		36.481	36.591	38.116	38.468	36.392	36.291
	34.269	34.938	37.067	36.079		36.485	36.596	38.114	38.466	36.414	36.163
	34.253	34.953	37.024	36.123		36.483	36.604	38.125	38.471	36.443	36.072
	34.249	34.955	36.95	36.135		36.486	36.619	38.142	38.48	36.481	36.01
	34.248	34.91	36.889	36.147		36.465	36.64	38.15	38.475	36.504	35.974
	34.229	34.897	36.871	36.128		36.45	36.645	38.151	38.47	36.535	35.946
	34.203	34.903	36.879	36.145		36.467	36.67	38.157	38.472	36.57	35.926
	34.192	34.912	36.847	36.125		36.484	36.688	38.142	38.474	36.616	35.928
	34.186	34.914	36.842	36.098		36.451	36.7	38.122	38.473	36.669	35.936
	34.173	34.941	36.803	36.08		36.465	36.731	38.14	38.475	36.703	35.946
	34.165	34.97	36.722	36.057		36.497	36.743	38.145	38.476	36.721	35.962
	34.177	34.99	36.595	36.042		36.489	36.756	38.149	38.461	36.747	35.98
	34.244	34.996	36.525	36.032		36.533	36.768	38.147	38.457	36.771	35.982
	34.369	34.998	36.48	36.021		36.586	36.772	38.147	38.44	36.792	35.981
	34.473	35	36.443	36.015		36.581	36.768	38.178	38.413	36.819	35.966
	34.537	35.004	36.406	36.01		36.553	36.767	38.173	38.377	36.804	35.946
	34.567	34.998	36.381	35.992		36.523	36.775	38.169	38.354	36.79	35.929
	34.578	34.983	36.364	35.979		36.503	36.78	38.165	38.33	36.781	35.97
	34.572	34.958	36.307	35.981		36.502	36.778	38.174	38.312	36.794	35.973
	34.582	34.931	36.278	35.958		36.522	36.765	38.168	38.294	36.808	35.897
	34.61	34.904	36.266	35.959		36.531	36.771	38.174	38.279	36.824	35.836
	34.62	34.875	36.252	35.956		36.548	36.768	38.162	38.276	36.829	35.798
	34.613	34.845	36.226	35.945		36.561	36.77	38.188	38.273	36.836	35.77
	34.606	34.817	36.201	35.935		36.578	36.768	38.206	38.263	36.841	35.761
	34.592	34.784	36.176	35.934		36.589	36.756	38.208	38.268	36.847	35.76
	34.589	34.842	36.163	35.934		36.604	36.762	38.214	38.251	36.861	35.737
	34.584	34.904	36.164	35.93		36.638	36.762	38.179	38.249	36.858	35.761
	34.602	34.933	36.158	35.922		36.645	36.775	38.182	38.257	36.851	35.745
	34.598	34.941	36.168	35.907		36.662	36.78	38.166	38.265	36.849	35.674
	34.594	34.95	36.173	35.915		36.677	36.78	38.153	38.269	36.847	35.606
	34.587	34.964	36.174	35.919		36.683	36.786	38.147	38.269	36.848	35.571
	34.563	34.993	36.183	35.917		36.683	36.8	38.161	38.26	36.848	35.544
	34.535	34.992	36.194	35.929		36.666	36.82	38.181	38.24	36.863	35.552
	34.565	34.986	36.199	35.923		36.668	36.844	38.167	38.228	36.879	35.529
	34.681	34.982	36.193	35.91		36.659	36.859	38.138	38.223	36.867	35.488
	34.746	34.977	36.187	35.95		36.672	36.89	38.106	38.212	36.837	35.501
	34.828	34.972	36.176	35.986		36.689	36.893	38.079	38.211	36.823	35.535
	34.864	34.972	36.164	36.003		36.693	36.905	38.078	38.205	36.829	35.517
	34.905	34.976	36.157	36.008		36.655	36.916	38.076	38.188	36.87	35.538
	34.918	35.015	36.146	35.996		36.635	36.935	38.062	38.2	36.902	35.6
	34.935	35.047	36.141	36.02		36.613	36.978	38.058	38.2	36.916	35.565
	34.946	35.155	36.131	36.031		36.569	36.969	38.042	38.21	36.93	35.48
	34.95	35.192	36.126	36.045		36.546	36.944	38.033	38.216	36.944	35.642
	34.942	34.892	36.119	36.057		36.533	36.92	38.021	38.216	36.945	35.708
	34.935	35.001	36.104	36.033		36.499	36.925	38.027	38.205	36.946	35.665
	34.918	34.626	36.081	36.016		36.484	36.903	38.033	38.206	36.94	35.576
	34.918	34.477	36.075	36		36.455	36.894	38.039	38.215	36.945	35.452
	34.904	34.933	36.079	35.981		36.471	36.868	38.056	38.222	36.951	35.341
	34.849	34.96	36.078	35.954		36.537	36.857	38.057	38.223	36.959	35.236
	34.82	34.875	36.074	35.922		36.578	36.851	38.06	38.222	36.973	35.186
	34.801	34.809	36.07	35.902		36.581	36.847	38.072	38.229	36.977	35.132
	34.791	34.667	36.06	35.883		36.569	36.864	38.073	38.223	36.983	35.085
	34.774	34.575	36.05	35.865		36.565	36.866	38.064	38.213	37.009	35.09
	34.767	34.487	36.03	35.833		36.54	36.861	38.057	38.208	36.993	35.116
	34.765	34.421	35.992	35.8		36.513	36.856	38.045	38.203	36.985	35.14
	34.748	34.517	35.969	35.775		36.497	36.855	38.037	38.2	36.941	35.222
	34.732	34.613	35.954	35.746		36.486	36.86	38.026	38.192	36.972	35.275
	34.733	34.698	35.944	35.783		36.473	36.872	38.006	38.186	36.993	35.254
	34.731	34.713	35.938	35.811		36.471	36.885	38.001	38.178	36.985	35.209
	34.724	34.707	35.927	35.826		36.475	36.892	37.991	38.159	36.906	35.219
	34.732	34.654	35.911	35.855		36.483	36.901	37.997	38.139	36.844	35.223
	34.718	34.592	35.909	35.854		36.499	36.92	37.992	38.125	36.769	35.256
	34.75	34.597	35.903	35.871		36.518	36.94	37.99	38.106	36.756	35.228
	34.72	34.618	35.894	35.875		36.614	36.949	38.017	38.092	36.781	35.225
	34.686	34.591	35.877	35.876		36.74	36.966	38.036	38.106	36.799	35.267
	34.676	34.577	35.863	35.876		36.847	36.982	38.042	38.104	36.763	35.28
	34.66	34.595	35.842	35.866		36.929	36.996	38.05	38.067	36.731	35.283
	34.648	34.586	35.83	35.858		36.999	37.029	38.051	38.091	36.72	35.244
	34.638	34.59	35.817	35.836		37.047	37.024	38.05	38.045	36.719	35.208
	34.63	34.615	35.807	35.853		37.083	37.042	38.081	37.969	36.731	35.202
	34.62	34.594	35.792	35.853		37.093	37.055	38.08	37.843	36.707	35.173
	34.634	34.731	35.78	35.851		37.055	37.074	38.072	37.762	36.695	35.184
	34.573	34.777	35.775	35.85		37.047	37.073	38.063	37.755	36.675	35.216
	34.476	34.776	35.779	35.848		37.072	37.068	38.071	37.702	36.653	35.21
	34.382	34.759	35.769	35.842		37.065	37.055	38.05	37.683	36.632	35.192
	34.304	34.732	35.768	35.853		37.043	37.062	38.056	37.658	36.618	35.081
	34.218	34.698	35.779	35.852		36.911	37.081	38.036	37.59	36.6	34.957
	34.144	34.7	35.869	35.829		36.782	37.071	38.023	37.552	36.578	34.862
	34.089	34.705	35.915	35.829		36.793	37.08	38.019	37.547	36.585	34.842
	34.018	34.717	35.965	35.82		36.731	37.081	38.014	37.546	36.583	34.902
	33.969	34.71	35.993	35.813		36.705	37.077	37.995	37.543	36.567	35.018
	33.935	34.729	35.986	35.826		36.685	37.082	37.946	37.544	36.581	35.081
	33.913	34.72	35.98	35.814		36.644	37.078	37.894	37.529	36.595	35.106
	33.895	34.733	35.965	35.804		36.611	37.092	37.88	37.506	36.587	35.115
	33.901	34.761	35.94	35.8		36.58	37.107	37.865	37.483	36.578	35.165
	33.923	34.779	35.9	35.79		36.569	37.114	37.847	37.466	36.567	35.164
	33.985	34.782	35.861	35.774		36.552	37.138	37.846	37.454	36.56	35.191
	34.035	34.79	35.843	35.764		36.539	37.142	37.817	37.442	36.565	35.17
	34.124	34.716	35.82	35.76		36.518	37.145	37.789	37.437	36.598	35.196
	34.221	34.636	35.79	35.745		36.546	37.145	37.784	37.434	36.628	35.222
	34.294	34.672	35.763	35.734		36.578	37.143	37.751	37.433	36.656	35.235
	34.348	34.681	35.747	35.703		36.567	37.156	37.731	37.388	36.68	35.316
	34.38	34.642	35.71	35.694		36.537	37.152	37.717	37.372	36.703	35.312
	34.395	34.599	35.686	35.688		36.509	37.147	37.7	37.361	36.719	35.344
	34.399	34.514	35.681	35.739		36.505	37.165	37.698	37.35	36.731	35.396
	34.459	34.529	35.677	35.819		36.51	37.164	37.705	37.344	36.741	35.427
	34.503	34.611	35.662	35.837		36.48	37.175	37.68	37.395	36.75	35.453
	34.443	34.652	35.658	35.806		36.426	37.177	37.684	37.447	36.761	35.45
	34.396	34.693	35.647	35.806		36.359	37.174	37.681	37.491	36.765	35.46
	34.353	34.731	35.644	35.945		36.337	37.161	37.677	37.52	36.769	35.631
	34.321	34.86	35.592	35.906		36.359	37.167	37.673	37.533	36.735	35.63
	34.393	34.904	35.588	35.856		36.405	37.157	37.668	37.547	36.676	35.574
	34.411	34.878	35.587	35.822		36.443	37.155	37.665	37.549	36.626	35.505
	34.432	34.892	35.582	35.807		36.485	37.156	37.688	37.548	36.576	35.473
	34.404	34.92	35.573	35.794		36.518	37.161	37.696	37.548	36.554	35.485
	34.411	34.986	35.571	35.798		36.544	37.167	37.732	37.544	36.552	35.511
	34.404	35.083	35.557	35.792		36.573	37.172	37.761	37.549	36.555	35.557
	34.417	35.15	35.552	35.776		36.537	37.189	37.722	37.557	36.566	35.624
	34.424	35.255	35.55	35.765		36.533	37.195	37.671	37.568	36.573	35.752
	34.445	35.382	35.554	35.767		36.557	37.205	37.657	37.577	36.56	35.871
	34.468	35.482	35.567	35.763		36.585	37.218	37.636	37.582	36.554	35.996
	34.529	35.461	35.578	35.759		36.612	37.216	37.619	37.59	36.556	36.039
	34.494	35.397	35.589	35.753		36.634	37.226	37.591	37.59	36.569	35.916
	34.487	35.317	35.587	35.743		36.566	37.244	37.57	37.584	36.567	35.79
	34.543	35.278	35.584	35.734		36.574	37.237	37.553	37.574	36.537	35.679
	34.65	35.221	35.587	35.729		36.59	37.242	37.537	37.565	36.52	35.626
	34.698	35.112	35.571	35.723		36.625	37.271	37.497	37.549	36.502	35.562
	34.936	35.054	35.544	35.736		36.657	37.272	37.48	37.531	36.479	35.506
	35.23	34.981	35.52	35.738		36.669	37.275	37.452	37.514	36.447	35.539
	35.212	34.832	35.495	35.739		36.681	37.261	37.408	37.496	36.409	35.581
	35.16	34.742	35.411	35.699		36.621	37.233	37.367	37.46	36.302	35.521
	35.123	34.68	35.365	35.693		36.607	37.207	37.336	37.404	36.169	35.364
	35.145	34.63	35.339	35.683		36.605	37.177	37.33	37.381	36.036	35.251
	35.025	34.601	35.306	35.685		36.606	37.146	37.302	37.374	35.893	35.176
	35.025	34.576	35.312	35.684		36.595	37.149	37.28	37.379	35.802	35.112
	34.986	34.577	35.422	35.691		36.584	37.142	37.281	37.373	35.776	35.171
	34.908	34.576	35.447	35.689		36.588	37.145	37.266	37.375	35.757	35.243
	34.814	34.582	35.566	35.708		36.558	37.156	37.271	37.369	35.736	35.278
	34.706	34.591	35.654	35.715		36.577	37.14	37.281	37.366	35.749	35.294
	34.635	34.581	35.646	35.705		36.613	37.157	37.27	37.371	35.765	35.284
	34.528	34.578	35.635	35.709		36.628	37.145	37.269	37.375	35.775	35.209
	34.458	34.658	35.499	35.723		36.625	37.138	37.276	37.371	35.799	35.146
	34.411	34.619	35.414	35.71		36.556	37.126	37.29	37.366	35.837	35.128
	34.355	34.554	35.386	35.712		36.425	37.125	37.299	37.362	35.848	35.139
	34.302	34.502	35.377	35.71		36.302	37.122	37.307	37.356	35.859	35.144
	34.257	34.453	35.352	35.782		36.206	37.134	37.312	37.353	35.893	35.161
	34.274	34.425	35.334	35.839		36.135	37.131	37.307	37.354	35.924	35.189
	34.275	34.398	35.309	35.845		36.069	37.143	37.345	37.35	35.971	35.205
	34.278	34.383	35.289	35.882		36.003	37.145	37.428	37.352	36.004	35.198
	34.411	34.388	35.274	35.925		35.955	37.147	37.458	37.349	36.027	35.196
	34.405	34.383	35.258	35.946		35.93	37.177	37.464	37.351	36.056	35.203
	34.386	34.385	35.241	35.988		35.919	37.199	37.472	37.355	36.077	35.212
	34.456	34.383	35.236	35.996		35.911	37.202	37.406	37.359	36.089	35.213
	34.533	34.393	35.223	36.072		35.916	37.231	37.332	37.358	36.104	35.209
	34.535	34.403	35.203	36.129		35.918	37.262	37.316	37.362	36.118	35.199
	34.573	34.412	35.198	36.187		35.889	37.293	37.249	37.382	36.082	35.22
	34.562	34.417	35.213	36.205		35.946	37.308	37.233	37.402	36.036	35.267
	34.578	34.425	35.221	36.196		36.065	37.331	37.206	37.419	36.052	35.266
	34.539	34.437	35.206	36.212		36.162	37.318	37.203	37.456	36.064	35.263
	34.492	34.447	35.199	36.215		36.229	37.303	37.191	37.467	36.025	35.27
	34.563	34.466	35.195	36.264		36.293	37.282	37.178	37.474	35.999	35.267
	34.552	34.546	35.185	36.263		36.325	37.275	37.174	37.473	35.993	35.259
	34.572	34.606	35.174	36.242		36.351	37.261	37.178	37.475	36.007	35.253
	34.607	34.654	35.15	36.231		36.367	37.258	37.178	37.485	36.033	35.244
	34.716	34.703	35.145	36.215		36.373	37.253	37.178	37.477	36.019	35.235
	34.753	34.716	35.142	36.217		36.391	37.252	37.182	37.494	35.994	35.233
	34.806	34.723	35.136	36.269		36.399	37.266	37.187	37.517	36.009	35.228
	34.831	34.73	35.138	36.336		36.412	37.24	37.204	37.531	36.03	35.221
	34.839	34.736	35.144	36.342		36.438	37.255	37.216	37.542	36.058	35.213
	34.829	34.728	35.145	36.321		36.442	37.275	37.234	37.548	36.031	35.21
	34.794	34.725	35.132	36.296		36.484	37.269	37.253	37.562	35.984	35.196
	34.88	34.708	35.14	36.328		36.527	37.273	37.251	37.575	35.953	35.188
	34.887	34.694	35.136	36.347		36.537	37.248	37.267	37.579	35.94	35.183
	34.874	34.669	35.101	36.339		36.522	37.241	37.281	37.603	35.981	35.198
	34.791	34.639	35.206	36.319		36.5	37.253	37.293	37.636	36.04	35.194
	34.734	34.615	35.294	36.317		36.471	37.268	37.296	37.625	36.076	35.158
	34.681	34.595	35.353	36.263		36.409	37.283	37.305	37.612	36.084	35.126
	34.697	34.603	35.418	36.156		36.359	37.287	37.321	37.598	36.094	35.104
	34.661	34.601	35.531	36.173		36.315	37.293	37.327	37.58	36.12	35.094
	34.668	34.602	35.573	36.187		36.27	37.284	37.344	37.581	36.18	35.099
	34.658	34.599	35.577	36.225		36.235	37.286	37.371	37.555	36.228	35.088
	34.687	34.577	35.688	36.303		36.185	37.301	37.366	37.531	36.253	35.078
	34.819	34.565	35.75	36.296		36.181	37.301	37.355	37.55	36.263	35.075
	34.794	34.557	35.688	36.294		36.197	37.286	37.341	37.547	36.268	35.082
	34.945	34.565	35.68	36.308		36.22	37.293	37.349	37.507	36.277	35.238
	34.984	34.556	35.729	36.402		36.163	37.281	37.35	37.479	36.275	35.397
	34.995	34.552	35.713	36.432		36.187	37.288	37.349	37.448	36.28	35.496
	34.989	34.543	35.792	36.308		36.178	37.285	37.354	37.435	36.295	35.568
	34.986	34.54	35.908	36.469		36.175	37.295	37.362	37.386	36.307	35.611
	34.924	34.463	36.008	36.462		36.205	37.291	37.357	37.471	36.309	35.64
	34.929	34.356	36.051	36.416		36.214	37.282	37.388	37.488	36.304	35.635
	34.953	34.304	35.97	36.432		36.237	37.282	37.395	37.501	36.316	35.557
	34.94	34.299	36.114	36.417		36.268	37.269	37.352	37.518	36.342	35.478
	34.808	34.316	36.235	36.424		36.292	37.254	37.261	37.432	36.375	35.419
	34.694	34.339	36.235	36.418		36.322	37.236	37.207	37.391	36.411	35.372
	34.816	34.363	36.223	36.378		36.352	37.22	37.195	37.38	36.435	35.413
	34.86	34.392	36.178	36.395		36.377	37.207	37.18	37.345	36.455	35.456
	34.874	34.41	36.14	36.428		36.4	37.202	37.159	37.278	36.471	35.488
	34.945	34.425	36.119	36.436		36.376	37.183	37.166	37.301	36.488	35.501
	34.882	34.446	36.136	36.455		36.329	37.176	37.163	37.285	36.498	35.513
	34.885	34.49	36.149	36.477		36.268	37.145	37.163	37.225	36.498	35.528
	34.941	34.613	36.099	36.488		36.213	37.138	37.17	37.12	36.496	35.546
	34.967	34.689	36.101	36.54		36.166	37.14	37.171	37.167	36.501	35.591
	35.022	34.752	36.073	36.58		36.119	37.129	37.166	37.215	36.51	35.627
	35.068	34.808	36.085	36.576		36.088	37.111	37.158	37.135	36.52	35.665
	35.077	34.996	36.052	36.567		36.036	37.109	37.158	37.181	36.492	35.698
	35.069	35.142	35.973	36.582		35.995	37.103	37.159	37.116	36.476	35.727
	35.116	35.282	35.833	36.549		35.969	37.101	37.168	37.167	36.446	35.721
	35.066	35.383	35.777	36.565		35.939	37.021	37.175	37.051	36.393	35.636
	35.069	35.374	35.813	36.587		35.889	36.907	37.182	36.942	36.323	35.553
	35.002	35.308	35.815	36.624		35.826	37.111	37.177	36.961	36.261	35.487
	34.985	35.316	35.819	36.652		35.781	37.084	37.185	37.121	36.248	35.44
	35.01	35.307	35.84	36.75		35.747	37.014	37.179	37.213	36.275	35.39
	35.015	35.339	35.832	36.804		35.757	36.938	37.185	37.241	36.298	35.342
	35.073	35.433	35.859	36.83		35.776	36.898	37.19	37.234	36.256	35.304
	35.139	35.387	35.91	36.809		35.802	36.861	37.188	37.283	36.365	35.277
	35.2	35.276	35.958	36.785		35.938	36.826	37.176	37.285	36.419	35.256
	35.208	35.253	36.012	36.771		35.996	36.799	37.183	37.314	36.405	35.238
	35.144	35.274	36.02	36.782		36.022	36.776	37.185	37.331	36.348	35.227
	35.063	35.19	36.037	36.866		36.046	36.758	37.162	37.225	36.255	35.211
	34.986	35.156	36.185	36.86		36.099	36.737	37.172	37.228	36.162	35.204
	34.931	35.12	36.239	36.877		36.114	36.72	37.183	37.296	36.125	35.195
	34.864	35.145	36.149	36.883		36.095	36.702	37.179	37.307	36.18	35.164
	34.813	35.135	36.062	36.871		36.056	36.678	37.17	37.299	36.228	35.135
	34.764	35.146	36.037	36.891		36.02	36.663	37.18	37.274	36.268	35.113
	34.722	35.127	36.069	36.88		35.988	36.661	37.198	37.25	36.314	35.099
	34.695	35.127	36.028	36.856		35.945	36.67	37.206	37.214	36.337	35.093
	34.714	35.221	35.982	36.868		35.839	36.666	37.206	37.175	36.354	35.09
	34.659	35.303	36.109	36.836		35.772	36.658	37.215	37.131	36.367	35.097
	34.586	35.395	36.241	36.843		35.74	36.63	37.237	37.099	36.381	35.101
	34.521	35.441	36.333	36.85		35.684	36.635	37.245	37.113	36.397	35.104
	34.469	35.372	36.354	36.841		35.643	36.611	37.252	37.261	36.414	35.109
	34.406	35.279	36.331	36.823		35.69	36.597	37.262	37.295	36.434	35.096
	34.428	35.295	36.334	36.807		35.666	36.607	37.269	37.384	36.438	35.092
	34.531	35.284	36.384	36.823		35.579	36.616	37.27	37.366	36.442	35.099
	34.653	35.301	36.453	36.828		35.595	36.626	37.262	37.321	36.436	35.11
	34.689	35.342	36.48	36.842		35.538	36.648	37.249	37.275	36.425	35.127
	34.73	35.351	36.508	36.863		35.49	36.659	37.232	37.211	36.418	35.12
	34.871	35.376	36.482	36.854		35.483	36.658	37.202	37.162	36.416	35.111
	34.86	35.506	36.469	36.875		35.448	36.668	37.169	37.124	36.418	35.101
	34.87	35.474	36.459	36.863		35.401	36.676	37.143	37.072	36.418	34.982
	34.944	35.492	36.414	36.792		35.418	36.678	37.156	37.014	36.432	34.844
	34.961	35.451	36.432	36.726		35.43	36.679	37.179	36.974	36.459	34.747
	34.918	35.409	36.473	36.697		35.524	36.698	37.183	36.943	36.484	34.738
	34.863	35.494	36.452	36.685		35.674	36.719	37.177	36.918	36.495	34.761
	34.831	35.631	36.454	36.684		35.696	36.716	37.18	36.898	36.501	34.777
	34.803	35.777	36.401	36.693		35.603	36.728	37.185	36.867	36.514	34.795
	34.758	35.903	36.345	36.656		35.598	36.726	37.204	36.841	36.523	34.811
	34.685	35.906	36.334	36.607		35.572	36.73	37.223	36.811	36.522	34.826
	34.641	35.782	36.449	36.6		35.472	36.729	37.246	36.808	36.504	34.817
	34.622	35.632	36.479	36.564		35.135	36.724	37.288	36.783	36.483	34.771
	34.586	35.49	36.484	36.556		35.314	36.714	37.31	36.754	36.458	34.722
	34.584	35.388	36.401	36.611		35.392	36.703	37.325	36.728	36.448	34.686
	34.638	35.327	36.328	36.685		35.322	36.683	37.29	36.717	36.445	34.674
	34.698	35.306	36.302	36.642		35.334	36.677	37.264	36.698	36.445	34.683
	34.654	35.271	37.465	36.552		35.101	36.659	37.161	36.689	36.446	34.702
	34.631	35.241	36.355	36.646		35.24	36.655	37.016	36.688	36.442	34.724
	34.645	35.233	36.291	36.596		35.195	36.652	36.915	36.673	36.439	34.754
	34.596	35.227	36.307	36.625		35.142	36.645	36.844	36.583	36.441	34.785
	34.771	35.227	36.292	36.676		35.099	36.618	36.812	36.531	36.449	34.778
	35.097	35.233	36.298	36.67		35.057	36.619	36.783	36.506	36.459	34.747
	35.255	35.236	36.278	36.72		35.018	36.606	36.831	36.504	36.477	34.738
	35.32	35.235	36.235	36.735		34.993	36.581	36.903	36.522	36.482	34.748
	35.406	35.25	36.213	36.798		34.966	36.581	36.902	36.538	36.476	34.759
	35.252	35.253	36.194	36.824		34.954	36.591	36.887	36.58	36.468	34.772
	35.022	35.244	36.15	36.816		34.944	36.592	36.832	36.603	36.442	34.774
	34.857	35.227	36.17	36.768		34.938	36.591	36.936	36.614	36.42	34.786
	34.749	35.198	36.243	36.796		34.917	36.581	37.001	36.614	36.402	34.801
	34.726	35.231	36.26	36.728		34.908	36.591	37.021	36.618	36.378	34.81
	34.766	35.294	36.267	36.741		34.905	36.579	36.978	36.62	36.361	34.822
	34.827	35.357	36.2	36.802		34.878	36.586	36.954	36.615	36.365	34.836
	34.843	35.392	36.114	36.814		34.472	36.578	36.878	36.616	36.374	34.864
	34.828	35.397	36.069	36.815		35.182	36.558	36.911	36.61	36.381	34.875
	34.667	35.379	36.037	36.85		34.873	36.511	37.019	36.602	36.387	34.843
	34.51	35.355	36.002	36.935		34.877	36.47	36.967	36.6	36.382	34.865
	34.402	35.312	35.975	37.039		34.905	36.45	36.929	36.585	36.379	34.872
	34.293	35.269	35.957	37.068		34.852	36.409	36.934	36.581	36.372	34.863
	34.22	35.209	35.944	37.067		34.946	36.385	36.919	36.572	36.364	34.857
	34.198	35.15	35.917	37.031		35.211	36.367	36.915	36.57	36.362	34.861
	34.142	35.101	35.902	37.009		35.259	36.355	36.872	36.558	36.357	34.87
	34.131	35.077	35.891	36.909		35.889	36.338	36.873	36.551	36.356	34.872
	34.12	35.062	35.867	36.855		35.628	36.338	36.867	36.538	36.352	34.876
	34.06	35.05	35.845	36.76		35.735	36.319	36.85	36.517	36.353	34.903
	33.98	35.036	35.83	36.677		36.406	36.327	36.848	36.478	36.353	34.922
	34.016	35.025	35.802	36.619		36.001	36.341	36.866	36.479	36.362	34.893
	34.201	35.004	35.79	36.621		34.7	36.371	36.849	36.493	36.375	34.872
	34.336	34.988	35.77	36.677		34.605	36.409	36.8	36.509	36.353	34.854
	34.392	34.97	35.744	36.62		35.444	36.388	36.831	36.546	36.337	34.822
	34.356	34.941	35.736	36.574		35.77	36.38	36.853	36.529	36.335	34.808
	34.441	34.88	35.715	36.535		35.595	36.354	36.899	36.5	36.332	34.804
	34.456	34.811	35.711	36.512		35.632	36.351	36.907	36.47	36.342	34.799
	34.467	34.749	35.682	36.493		35.474	36.372	36.916	36.486	36.357	34.787
	34.508	34.709	35.667	36.475		35.36	36.361	36.945	36.518	36.366	34.789
	34.475	34.673	35.695	36.47		35.147	36.325	36.933	36.542	36.366	34.774
	34.541	34.65	35.727	36.459		34.8	36.309	36.917	36.549	36.368	34.722
	34.637	34.635	35.812	36.438		34.586	36.292	36.91	36.551	36.366	34.692
	34.683	34.618	36.025	36.421		34.639	36.26	36.905	36.556	36.35	34.674
	34.635	34.607	36.098	36.406		34.73	36.208	36.875	36.557	36.322	34.665
	34.578	34.592	36.025	36.389		34.806	36.158	36.858	36.564	36.302	34.688
	34.653	34.586	35.917	36.384		35.426	36.121	36.806	36.579	36.292	34.752
	34.723	34.606	35.827	36.362		35.746	36.095	36.791	36.588	36.234	34.821
	34.757	34.623	35.813	36.348		35.963	36.089	36.804	36.594	36.136	34.862
	34.752	34.63	35.831	36.351		35.919	36.079	36.813	36.589	36.095	34.813
	34.734	34.633	35.82	36.382		36.028	36.057	36.832	36.598	36.089	34.761
	34.716	34.643	35.956	36.426		35.9	36.079	36.85	36.606	36.035	34.724
	34.704	34.645	36.062	36.448		35.401	36.072	36.871	36.591	35.918	34.754
	34.662	34.646	36.118	36.447		35.405	36.068	36.876	36.592	35.785	34.773
	34.589	34.654	36.064	36.435		35.427	36.079	36.88	36.612	35.642	34.761
	34.487	34.664	35.959	36.408		35.43	36.084	36.842	36.626	35.526	34.649
	34.426	34.671	35.891	36.407		35.413	36.089	36.818	36.623	35.476	34.562
	34.332	34.679	35.832	36.404		35.396	36.106	36.769	36.634	35.416	34.479
	34.284	34.684	35.768	36.393		35.369	36.1	36.728	36.648	35.38	34.395
	34.235	34.674	35.721	36.382		35.324	36.109	36.691	36.64	35.392	34.339
	34.228	34.638	35.711	36.389		35.473	36.116	36.643	36.646	35.421	34.373
	34.193	34.61	35.692	36.382		35.377	36.115	36.604	36.644	35.414	34.405
	34.162	34.584	35.662	36.357		35.42	36.1	36.526	36.647	35.533	34.393
	34.122	34.564	35.638	36.323		35.482	36.097	36.516	36.647	35.615	34.391
	34.105	34.548	35.612	36.271		35.424	36.081	36.649	36.644	35.648	34.473
	34.103	34.554	35.584	36.238		35.399	36.076	36.683	36.638	35.644	34.592
	34.102	34.577	35.559	36.184		35.458	36.06	36.715	36.641	35.682	34.61
	34.17	34.602	35.524	36.136		35.483	36.042	36.797	36.634	35.593	34.662
	34.258	34.628	35.502	36.103		35.471	36.027	36.806	36.629	35.548	34.754
	34.278	34.651	35.455	36.058		35.46	36.023	36.747	36.627	35.529	34.702
	34.295	34.674	35.476	36.006		35.398	36.016	36.671	36.626	35.474	34.699
	34.319	34.709	35.475	35.954		35.451	36.021	36.683	36.623	35.416	34.697
	34.324	34.71	35.47	35.907		35.507	36.009	36.735	36.627	35.368	34.636
	34.331	34.709	35.456	35.857		35.558	36.005	36.715	36.629	35.387	34.593
	34.336	34.712	35.446	35.802		35.578	36.002	36.691	36.639	35.465	34.585
	34.338	34.715	35.426	35.763		35.565	35.985	36.641	36.645	35.54	34.566
	34.317	34.729	35.407	35.738		35.552	35.985	36.592	36.653	35.594	34.541
	34.296	34.742	35.39	35.786		35.57	35.983	36.554	36.666	35.647	34.508
	34.287	34.75	35.352	35.817		35.528	35.974	36.532	36.672	35.616	34.531
	34.312	34.754	35.318	35.857		35.522	35.976	36.518	36.674	35.56	34.527
	34.342	34.773	35.285	35.865		35.7	35.957	36.5	36.674	35.502	34.577
	34.359	34.915	35.238	35.884		35.687	35.963	36.488	36.67	35.421	34.571
	34.349	34.968	35.235	35.887		35.652	35.964	36.478	36.666	35.394	34.73
	34.32	34.974	35.254	35.9		35.596	35.971	36.439	36.653	35.333	34.85
	34.301	34.94	35.243	35.905		35.516	35.97	36.423	36.645	35.166	34.861
	34.288	34.894	35.258	35.913		35.45	35.954	36.385	36.654	35.108	34.783
	34.262	34.9	35.293	35.903		35.41	35.944	36.344	36.664	35.065	34.707
	34.21	34.774	35.289	35.92		35.352	35.915	36.324	36.657	35.12	34.771
	34.243	34.603	35.307	35.918		35.279	35.914	36.302	36.655	35.118	34.809
	34.326	34.48	35.372	35.992		35.219	35.946	36.28	36.65	35.043	34.806
	34.402	34.403	35.403	36.03		35.215	35.9	36.27	36.638	34.989	34.877
	34.446	34.401	35.427	36.035		35.222	35.836	36.26	36.634	34.965	34.808
	34.468	34.411	35.431	36.037		35.207	35.799	36.247	36.63	34.963	34.725
	34.468	34.423	35.438	36.036		35.15	35.761	36.237	36.636	34.946	34.717
	34.479	34.435	35.437	36.019		35.133	35.732	36.226	36.637	34.894	34.701
	34.449	34.446	35.431	36.011		35.052	35.715	36.219	36.634	34.933	34.726
	34.452	34.473	35.393	36.007		35.073	35.71	36.216	36.615	34.962	34.74
	34.482	34.494	35.381	36.004		35.134	35.699	36.207	36.619	34.936	34.738
	34.492	34.488	35.368	36.001		35.049	35.691	36.197	36.626	34.924	34.692
	34.477	34.465	35.366	35.985		34.984	35.679	36.184	36.625	34.894	34.664
	34.488	34.607	35.337	35.989		34.983	35.674	36.177	36.628	34.832	34.71
	34.429	34.689	35.309	35.995		35.036	35.683	36.153	36.628	34.826	34.768
	34.479	34.726	35.286	35.994		35.019	35.67	36.145	36.632	34.91	34.767
	34.54	34.756	35.273	35.992		34.984	35.667	36.128	36.642	34.881	34.747
	34.548	34.794	35.284	35.985		35.093	35.666	36.104	36.631	34.847	34.719
	34.64	34.812	35.282	35.981		35.198	35.668	36.081	36.628	34.824	34.71
	34.727	34.831	35.282	35.993		35.246	35.662	36.066	36.616	34.797	34.7
	34.76	34.854	35.276	35.999		35.422	35.659	36.054	36.635	34.814	34.671
	34.777	34.869	35.273	36.012		35.543	35.663	36.047	36.662	34.823	34.671
	34.783	34.888	35.295	36.004		35.533	35.659	36.06	36.68	34.846	34.706
	34.782	34.895	35.343	36.014		35.465	35.681	36.103	36.694	34.858	34.71
	34.773	34.922	35.36	36.021		35.341	35.681	36.052	36.703	34.849	34.768
	34.774	34.925	35.396	36.012		35.232	35.673	36.019	36.71	34.84	34.852
	34.758	34.878	35.443	36.032		35.16	35.666	36.022	36.714	34.876	34.911
	34.741	34.809	35.469	36.034		35.089	35.659	36.041	36.709	34.889	34.979
	34.727	34.753	35.486	36.056		34.999	35.663	36.051	36.704	34.884	35.038
	34.707	34.719	35.498	36.057		34.933	35.665	36.064	36.701	34.847	35.027
	34.699	34.7	35.501	36.08		34.982	35.65	36.088	36.695	34.863	35.025
	34.694	34.677	35.485	36.086		34.906	35.642	36.112	36.687	34.904	35.061
	34.66	34.648	35.461	36.073		34.841	35.637	36.084	36.687	34.954	35.097
	34.64	34.611	35.411	36.093		34.798	35.617	36.071	36.699	34.96	35.182
	34.6	34.585	35.409	36.099		34.77	35.636	36.066	36.697	35.102	35.213
	34.582	34.571	35.402	36.096		34.725	35.675	36.066	36.703	35.096	35.232
	34.537	34.543	35.396	36.088		34.702	35.702	36.067	36.704	35.086	35.196
	34.515	34.508	35.353	36.083		34.826	35.71	36.068	36.704	35.091	35.194
	34.498	34.476	35.332	36.078		34.904	35.745	36.028	36.702	35.078	35.204
	34.505	34.445	35.331	36.096		34.94	35.739	36.064	36.708	35.095	35.244
	34.494	34.423	35.329	36.101		34.945	35.735	36.081	36.713	35.111	35.27
	34.501	34.404	35.324	36.098		34.949	35.742	36.089	36.718	35.206	35.279
	34.514	34.394	35.317	36.109		34.965	35.753	36.114	36.712	35.32	35.256
	34.518	34.383	35.307	36.116		34.984	35.697	36.136	36.684	35.298	35.247
	34.517	34.374	35.301	36.11		34.962	35.663	36.146	36.664	35.265	35.232
	34.532	34.369	35.32	36.109		34.918	35.635	36.148	36.669	35.24	35.169
	34.523	34.376	35.387	36.11		34.887	35.613	36.151	36.699	35.191	35.129
	34.59	34.379	35.477	36.109		34.859	35.587	36.163	36.762	35.084	35.166
	34.519	34.382	35.799	36.088		34.832	35.585	36.172	36.767	35.009	35.197
	34.477	34.375	35.844	36.069		34.814	35.556	36.174	36.873	34.985	35.255
	34.493	34.401	35.896	36.078		34.815	35.53	36.171	36.983	34.977	35.258
	34.498	34.445	35.916	36.069		34.822	35.507	36.157	37.007	35.197	35.303
	34.512	34.479	35.834	36.057		34.834	35.467	36.165	36.976	35.324	35.404
	34.534	34.505	35.806	36.041		34.829	35.438	36.182	36.934	35.215	35.451
	34.519	34.529	35.815	36.029		34.843	35.417	36.174	36.849	35.128	35.332
	34.51	34.568	35.941	36.014		34.865	35.398	36.177	36.784	35.127	35.207
	34.476	34.575	35.986	36.005		34.903	35.383	36.173	36.808	35.066	35.125
	34.439	34.546	35.971	36.003		34.942	35.378	36.15	36.88	34.98	35.078
	34.433	34.518	35.94	35.99		34.981	35.378	36.152	36.894	34.963	35.045
	34.431	34.5	35.969	35.984		35.01	35.379	36.153	36.818	34.9	35.053
	34.444	34.491	35.839	35.982		35.042	35.399	36.158	36.717	34.821	35.031
	34.494	34.491	35.718	35.983		35.056	35.406	36.159	36.676	34.784	34.989
	34.499	34.494	35.809	36		35.042	35.413	36.15	36.647	34.731	34.947
	34.445	34.535	35.866	36.001		35.043	35.452	36.131	36.627	34.677	34.923
	34.385	34.532	35.93	36.001		35.067	35.486	36.121	36.657	34.706	34.868
	34.328	34.524	35.951	35.997		35.033	35.459	36.116	36.677	34.727	34.858
	34.288	34.532	35.938	35.984		34.981	35.448	36.115	36.715	34.857	34.843
	34.231	34.705	35.945	35.997		34.966	35.505	36.105	36.733	34.938	34.873
	34.201	34.761	35.926	36.004		34.962	35.552	36.103	36.747	34.994	34.843
	34.176	34.777	35.796	35.982		34.969	35.552	36.113	36.764	35.049	34.811
	34.159	34.789	35.742	36.036		34.961	35.547	36.138	36.793	35.156	34.765
	34.138	34.838	35.709	36.093		34.946	35.533	36.151	36.737	35.236	34.888
	34.116	34.861	35.716	36.108		34.951	35.511	36.177	36.66	35.331	35.015
	34.205	34.814	35.75	36.107		34.958	35.495	36.183	36.543	35.325	35.155
	34.243	34.762	35.847	36.13		34.956	35.482	36.186	36.488	35.266	35.175
	34.277	34.753	35.812	36.152		34.945	35.494	36.176	36.474	35.246	35.16
	34.312	34.931	35.834	36.18		34.904	35.514	36.171	36.478	35.285	35.247
	34.293	34.875	35.831	36.221		34.858	35.524	36.167	36.462	35.303	35.24
	34.273	34.823	35.812	36.194		34.838	35.541	36.17	36.439	35.385	35.278
	34.232	34.798	35.728	36.183		34.834	35.564	36.171	36.432	35.464	35.35
	34.168	34.74	35.649	36.176		34.838	35.536	36.18	36.424	35.524	35.446
	34.191	34.73	35.682	36.193		34.833	35.51	36.185	36.414	35.569	35.396
	34.279	34.766	35.676	36.174		34.865	35.495	36.208	36.379	35.584	35.425
	34.345	34.784	35.634	36.151		34.904	35.49	36.219	36.359	35.593	35.437
	34.364	34.826	35.626	36.137		34.983	35.485	36.224	36.352	35.6	35.346
	34.404	34.808	35.569	36.156		35.111	35.491	36.232	36.316	35.614	35.278
	34.431	34.844	35.554	36.16		35.194	35.503	36.232	36.294	35.625	35.258
	34.502	34.846	35.579	36.154		35.263	35.51	36.23	36.28	35.636	35.247
	34.533	34.863	35.565	36.138		35.31	35.541	36.204	36.275	35.636	35.203
	34.552	34.822	35.561	36.133		35.318	35.563	36.2	36.283	35.636	35.163
	34.698	34.863	35.544	36.109		35.289	35.602	36.191	36.302	35.64	35.213
	34.701	34.84	35.509	36.087		35.312	35.604	36.187	36.301	35.571	35.321
	34.693	34.785	35.515	36.06		35.392	35.589	36.19	36.381	35.505	35.375
	34.68	34.753	35.496	36.053		35.422	35.58	36.187	36.581	35.458	35.4
	34.653	34.738	35.498	36.062		35.447	35.56	36.19	36.565	35.426	35.383
	34.62	34.723	35.523	36.06		35.473	35.545	36.199	36.513	35.363	35.326
	34.688	34.693	35.562	36.064		35.478	35.541	36.205	36.449	35.299	35.303
	34.696	34.758	35.576	36.064		35.461	35.541	36.215	36.456	35.256	35.279
	34.658	34.769	35.57	36.059		35.42	35.54	36.222	36.469	35.227	35.296
	34.661	34.77	35.552	36.062		35.389	35.532	36.227	36.479	35.212	35.359
	34.73	34.798	35.523	36.057		35.377	35.522	36.23	36.448	35.205	35.325
	34.952	34.848	35.587	36.083		35.358	35.525	36.236	36.434	35.198	35.27
	35.058	34.993	35.583	36.086		35.315	35.531	36.228	36.575	35.187	35.228
	35.022	35.017	35.609	36.107		35.259	35.552	36.227	36.621	35.182	35.17
	34.993	35.014	35.716	36.109		35.215	35.564	36.234	36.623	35.179	35.162
	35.035	35.035	35.892	36.103		35.193	35.587	36.311	36.616	35.196	35.209
	35.093	35.027	36.093	36.095		35.201	35.611	36.292	36.602	35.213	35.206
	35.074	35.068	36.164	36.09		35.213	35.64	36.262	36.602	35.22	35.139
	35.028	35.033	36.203	36.077		35.236	35.636	36.297	36.591	35.217	35.107
	35.018	35.004	36.229	36.103		35.263	35.642	36.295	36.584	35.213	35.034
	35.118	35.006	36.273	36.118		35.311	35.634	36.308	36.582	35.195	34.911
	35.413	35.038	36.308	36.101		35.347	35.634	36.357	36.551	35.166	34.832
	35.468	35.047	36.359	36.1		35.358	35.649	36.361	36.532	35.138	34.806
	35.429	35.034	36.415	36.097		35.337	35.659	36.33	36.512	35.111	34.847
	35.384	34.992	36.456	36.088		35.312	35.647	36.321	36.509	35.079	34.847
	35.228	34.913	36.418	36.082		35.326	35.626	36.319	36.479	35.063	34.785
	35.089	34.836	36.412	36.08		35.385	35.6	36.301	36.458	35.075	34.77
	34.981	34.775	36.446	36.079		35.436	35.587	36.288	36.447	35.073	34.943
	34.941	34.713	36.364	36.084		35.493	35.581	36.311	36.436	35.075	35.143
	34.992	34.646	36.489	36.045		35.427	35.576	36.334	36.428	35.085	35.408
	35.216	34.702	36.516	35.988		35.449	35.564	36.355	36.422	35.091	35.651
	35.453	34.811	36.527	36.14		35.462	35.549	36.363	36.41	35.086	35.748
	35.412	34.832	36.54	36.258		35.447	35.561	36.361	36.407	35.067	35.698
	35.258	34.935	36.546	36.202		35.391	35.576	36.436	36.416	35.054	35.559
	35.111	34.944	36.457	36.18		35.354	35.579	36.52	36.413	35.034	35.442
	34.999	34.976	36.49	36.198		35.309	35.584	36.533	36.431	35.02	35.329
	34.918	34.947	36.511	36.158		35.215	35.584	36.508	36.45	35.007	35.228
	34.89	34.943	36.566	36.212		35.18	35.594	36.561	36.462	34.993	35.01
	34.82	34.966	36.545	36.198		35.2	35.609	36.616	36.47	34.984	34.997
	34.748	34.946	36.555	36.201		35.152	35.609	36.674	36.478	34.972	34.926
	34.722	34.941	36.622	36.247		35.125	35.624	36.662	36.465	34.959	34.888
	34.51	34.987	36.642	36.29		35.089	35.633	36.691	36.468	34.951	34.884
	34.481	35.023	36.622	36.267		35.03	35.646	36.76	36.458	34.944	34.832
	34.449	35.034	36.562	36.27		34.987	35.65	36.726	36.451	34.937	34.78
	34.411	35.071	36.513	36.293		34.955	35.709	36.644	36.429	34.93	34.725
	34.367	35.118	36.602	36.294		34.967	35.64	36.555	36.43	34.933	34.679
	34.31	35.077	36.568	36.323		34.902	35.55	36.505	36.43	34.951	34.647
	34.256	35.029	36.608	36.351		34.893	35.477	36.437	36.432	34.954	34.623
	34.203	35.091	36.589	36.318		34.887	35.426	36.411	36.439	34.957	34.617
	34.146	35.269	36.477	36.264		34.882	35.394	36.354	36.417	34.961	34.601
	34.113	35.387	36.442	36.217		34.864	35.359	36.351	36.417	34.958	34.584
	34.104	35.462	36.394	36.198		34.863	35.355	36.34	36.419	34.95	34.562
	34.087	35.431	36.356	36.244		34.899	35.363	36.305	36.415	34.943	34.545
	34.09	35.367	36.362	36.181		34.875	35.351	36.266	36.412	34.943	34.523
	34.063	35.29	36.375	36.207		34.8	35.342	36.235	36.414	34.939	34.502
	34.042	35.197	36.364	36.175		34.752	35.343	36.24	36.413	34.918	34.502
	34.045	35.147	36.297	36.146		34.731	35.346	36.392	36.417	34.9	34.5
	34.066	35.127	36.313	36.089		34.695	35.348	36.567	36.413	34.878	34.495
	34.095	35.117	36.242	36.047		34.639	35.346	36.612	36.414	34.863	34.522
	34.107	35.063	36.111	36.004		34.667	35.361	36.634	36.418	34.869	34.54
	34.103	34.981	36.027	35.974		34.702	35.38	36.633	36.421	34.941	34.555
	34.104	34.858	35.988	35.956		34.687	35.391	36.57	36.42	34.957	34.555
	34.115	34.739	35.96	35.932		34.722	35.389	36.514	36.415	34.933	34.555
	34.099	34.756	36.014	35.899		34.822	35.372	36.462	36.403	34.917	34.559
	34.095	34.826	35.955	35.873		34.878	35.351	36.418	36.386	34.99	34.555
	34.033	34.83	35.912	35.848		34.843	35.341	36.399	36.37	34.91	34.546
	33.967	34.845	35.893	35.824		34.805	35.336	36.401	36.323	34.814	34.537
	33.927	34.866	35.888	35.803		34.664	35.356	36.556	36.309	34.717	34.532
	33.899	34.917	35.994	35.789		34.597	35.358	36.541	36.295	34.721	34.534
	34.181	34.932	36.116	35.807		34.644	35.347	36.579	36.292	34.744	34.533
	34.358	34.952	36.156	35.81		34.728	35.347	36.542	36.294	34.732	34.524
	34.512	34.918	36.045	35.798		34.688	35.346	36.451	36.264	34.839	34.519
	34.624	34.847	35.964	35.784		34.742	35.349	36.397	36.245	34.969	34.522
	34.691	34.794	35.93	35.789		34.843	35.362	36.347	36.238	34.955	34.528
	34.724	34.811	35.909	35.8		34.962	35.404	36.371	36.24	34.984	34.462
	34.757	34.832	35.893	35.753		34.909	35.403	36.406	36.242	34.975	34.386
	34.804	34.798	35.803	35.762		35.063	35.437	36.406	36.245	34.97	34.329
	34.848	34.82	35.747	35.757		34.985	35.478	36.401	36.241	34.871	34.225
	34.84	34.823	35.714	35.75		34.91	35.52	36.413	36.243	34.774	34.151
	34.82	34.733	35.698	35.755		34.884	35.558	36.427	36.266	34.649	34.105
	34.807	34.642	35.654	35.767		34.793	35.606	36.439	36.28	34.586	34.084
	34.799	34.583	35.668	35.798		34.715	35.569	36.438	36.287	34.553	34.071
	34.789	34.527	35.671	35.801		34.705	35.56	36.424	36.287	34.489	34.056
	34.948	34.493	35.646	35.79		34.638	35.596	36.423	36.286	34.42	34.062
	35.024	34.471	35.629	35.799		34.584	35.622	36.409	36.271	34.413	34.071
	34.96	34.455	35.605	35.797		34.677	35.628	36.399	36.295	34.308	34.129
	34.919	34.438	35.575	35.803		34.64	35.622	36.386	36.316	34.235	34.129
	34.858	34.421	35.54	35.798		34.638	35.607	36.363	36.332	34.331	34.115
	34.815	34.388	35.516	35.789		34.627	35.592	36.345	36.369	34.344	34.11
	34.789	34.375	35.493	35.79		34.612	35.588	36.314	36.393	34.332	34.111
	34.76	34.352	35.481	35.769		34.596	35.578	36.327	36.493	34.338	34.111
	34.74	34.336	35.423	35.752		34.538	35.563	36.28	36.504	34.335	34.116
	34.719	34.331	35.379	35.749		34.661	35.564	36.278	36.484	34.467	34.124
	34.702	34.351	35.379	35.745		34.755	35.554	36.287	36.448	34.515	34.149
	34.677	34.471	35.371	35.721		34.848	35.555	36.274	36.425	34.507	34.161
	34.615	34.46	35.361	35.739		34.811	35.557	36.282	36.409	34.497	34.134
	34.547	34.416	35.35	35.767		34.778	35.558	36.266	36.391	34.515	34.108
	34.574	34.378	35.339	35.78		34.759	35.569	36.253	36.385	34.523	34.1
	34.648	34.353	35.321	35.788		34.732	35.58	36.253	36.399	34.573	34.09
	34.61	34.337	35.332	35.787		34.73	35.595	36.247	36.395	34.582	34.078
	34.619	34.323	35.337	35.788		34.716	35.599	36.24	36.388	34.58	34.058
	34.459	34.319	35.332	35.795		34.706	35.601	36.241	36.383	34.589	34.043
	34.295	34.324	35.325	35.789		34.694	35.602	36.234	36.38	34.597	34.035
	34.179	34.326	35.316	35.805		34.703	35.611	36.21	36.377	34.613	34.043
	34.087	34.31	35.294	35.817		34.703	35.613	36.197	36.379	34.601	34.063
	33.998	34.295	35.312	35.815		34.707	35.609	36.187	36.373	34.715	34.022
	33.942	34.29	35.31	35.81		34.727	35.61	36.187	36.375	34.866	33.969
	33.904	34.271	35.306	35.814		34.756	35.607	36.18	36.345	34.961	33.94
	33.815	34.254	35.303	35.808		34.774	35.607	36.168	36.32	34.997	33.933
	33.769	34.247	35.312	35.808		34.78	35.593	36.16	36.284	34.985	33.943
	33.715	34.234	35.282	35.8		34.775	35.606	36.165	36.367	34.971	33.957
	33.663	34.29	35.275	35.791		34.778	35.611	36.173	36.41	34.992	33.972
	33.63	34.31	35.264	35.854		34.79	35.615	36.193	36.393	34.985	33.981
	33.642	34.301	35.214	35.948		34.786	35.611	36.179	36.465	35.014	33.99
	33.805	34.29	35.176	35.973		34.785	35.608	36.171	36.52	34.97	33.998
	33.746	34.294	35.155	35.976		34.761	35.608	36.179	36.553	34.894	34.031
	33.7	34.302	35.149	36.064		34.731	35.607	36.182	36.58	34.789	34.173
	33.728	34.309	35.149	36.07		34.765	35.613	36.181	36.594	34.706	34.187
	33.764	34.311	35.122	36.04		34.745	35.606	36.17	36.746	34.681	34.158
	33.892	34.307	35.105	36.057		34.769	35.613	36.144	36.704	34.686	34.147
	33.988	34.472	35.072	36.039		34.79	35.648	36.137	36.644	34.65	34.14
	34.06	34.454	35.033	36.097		34.8	35.667	36.137	36.671	34.642	34.14
	34.139	34.394	35.019	36.112		34.802	35.692	36.136	36.678	34.722	34.15
	34.308	34.35	35.057	36.118		34.803	35.729	36.142	36.65	34.784	34.182
	34.347	34.328	35.073	36.196		34.877	35.735	36.15	36.654	34.826	34.2
	34.236	34.324	35.083	36.179		34.701	35.742	36.144	36.626	34.867	34.202
	34.114	34.332	35.074	36.148		34.675	35.732	36.149	36.611	35.007	34.194
	33.985	34.364	35.072	36.139		34.756	35.718	36.156	36.663	35.1	34.188
	33.945	34.369	35.059	36.208		33.733	35.705	36.155	36.762	34.98	34.182
	33.871	34.355	35.066	36.3		34.175	35.704	36.153	36.732	34.88	34.145
	33.963	34.349	35.035	36.334		34.117	35.71	36.139	36.665	34.791	34.078
	33.927	34.358	35.041	36.355		34.21	35.706	36.13	36.681	34.708	34.237
	33.957	34.374	35.05	36.382			35.7	36.131	36.748	34.617	34.421
	33.955	34.418	35.086	36.394			35.692	36.114	36.769	34.547	34.565
	34.106	34.438	35.039	36.372			35.689	36.09	36.727	34.484	34.67
	34.215	34.424	34.979	36.365			35.698	36.027	36.702	34.435	34.638
	34.231	34.412	34.935	36.411			35.716	35.989	36.632	34.398	34.529
	34.265	34.408	34.892	36.37			35.727	35.986	36.622	34.355	34.41
	34.28	34.402	34.873	36.29		35.681	35.734	35.991	36.738	34.355	34.304
	34.193	34.461	34.845	36.312			35.751	36.002	36.724	34.337	34.215
	34.201	34.474	34.843	36.358			35.774	35.991	36.788	34.34	34.17
	34.275	34.476	34.816	36.415			35.797	35.984	36.737	34.375	34.386
	34.351	34.481	34.805	36.43			35.806	35.982	36.711	34.403	34.498
	34.369	34.492	34.798	36.433			35.827	35.979	36.648	34.426	34.408
	34.328	34.504	34.792	36.407		34.87	35.845	35.972	36.638	34.446	34.331
	34.38	34.516	34.788	36.395		34.893	35.823	35.96	36.697	34.457	34.274
	34.309	34.523	34.771	36.42		34.888	35.805	35.95	36.759	34.477	34.218
	34.306	34.538	34.756	36.384		34.885	35.799	35.948	36.756	34.511	34.179
	34.36	34.548	34.746	36.377		34.865	35.796	35.937	36.786	34.517	34.161
	34.475	34.562	34.725	36.422		34.847	35.786	35.923	36.759	34.505	34.16
	34.41	34.569	34.715	36.441		34.785	35.733	35.909	36.676	34.496	34.137
	34.339	34.581	34.704	36.457		34.761	35.707	35.908	36.69	34.488	34.119
	34.248	34.559	34.688	36.438		34.686	35.691	35.889	36.772	34.481	34.089
	34.317	34.518	34.672	36.439		34.749	35.684	35.88	36.813	34.474	34.076
	34.506	34.467	34.661	36.44		34.746	35.673	35.858	36.799	34.475	34.061
	34.707	34.426	34.636	36.409		34.737	35.676	35.829	36.687	34.495	34.043
	34.801	34.401	34.618	36.41		34.72	35.678	35.812	36.751	34.509	34.026
	34.878	34.389	34.598	36.397		34.714	35.683	35.802	36.73	34.485	34.018
	34.86	34.371	34.589	36.381		34.731	35.696	35.796	36.702	34.498	34.015
	34.885	34.364	34.598	36.365		34.744	35.706	35.793	36.684	34.471	34.008
	34.952	34.365	34.582	36.342		34.769	35.694	35.806	36.676	34.431	34.007
	35.021	34.37	34.558	36.362		34.79	35.707	35.805	36.644	34.477	34.011
	35.074	34.404	34.565	36.345		34.726	35.735	35.8	36.626	34.524	34.023
	35.107	34.41	34.579	36.347		34.8	35.773	35.806	36.617	34.578	34.034
	35.146	34.437	34.593	36.324		34.862	35.788	35.805	36.621	34.672	34.032
	35.238	34.475	34.593	36.395		34.891	35.805	35.808	36.635	34.639	34.028
	35.138	34.5	34.595	36.396		34.916	35.82	35.809	36.661	34.731	34.033
	35.015	34.526	34.594	36.399		34.922	35.847	35.8	36.877	34.856	34.041
	35.072	34.561	34.597	36.351		34.916	35.867	35.8	36.917	34.839	34.191
	35.18	34.568	34.611	36.274		34.906	35.873	35.789	36.981	34.779	34.165
	35.238	34.571	34.64	36.22		34.915	35.846	35.776	36.932	34.779	34.12
	35.204	34.571	34.67	36.233		34.897	35.806	35.766	36.864	34.803	34.07
	35.242	34.573	34.697	36.246		34.884	35.786	35.757	36.823	34.704	34.056
	35.394	34.572	34.691	36.227		34.897	35.763	35.756	36.783	34.636	34.016
	35.504	34.574	34.711	36.191		34.9	35.749	35.746	36.765	34.623	33.983
	35.54	34.582	34.719	36.251		34.892	35.737	35.746	36.879	34.663	33.931
	35.441	34.589	34.735	36.29		34.852	35.744	35.744	36.873	34.684	33.915
	35.294	34.578	34.746	36.317		34.827	35.746	35.749	36.854	34.667	33.908
	35.169	34.566	34.752	36.355		34.828	35.741	35.755	36.905	34.664	33.929
	35.062	34.559	34.751	36.357		34.815	35.737	35.758	36.927	34.759	33.914
	35.015	34.567	34.744	36.323		34.811	35.721	35.758	36.892	34.754	33.927
	34.981	34.568	34.765	36.265		34.821	35.708	35.762	36.828	34.766	33.921
	34.907	34.549	34.747	36.264		34.804	35.715	35.755	36.869	34.749	33.963
	34.823	34.517	34.753	36.247		34.789	35.735	35.745	36.927	34.639	33.994
	34.783	34.492	34.755	36.269		34.795	35.748	35.755	36.956	34.532	33.957
	34.768	34.474	34.765	36.276		34.797	35.74	35.762	36.931	34.475	33.906
	34.711	34.472	34.819	36.269		34.801	35.746	35.756	36.881	34.49	33.861
	34.643	34.467	34.831	36.3		34.819	35.739	35.751	36.797	34.616	33.863
	34.604	34.463	34.834	36.331		34.823	35.73	35.744	36.742	34.641	33.874
	34.561	34.459	34.828	36.362		34.829	35.716	35.738	36.698	34.644	33.904
	34.524	34.477	34.82	36.422		34.825	35.723	35.737	36.673	34.631	33.936
	34.498	34.488	34.826	36.46		34.82	35.73	35.739	36.64	34.688	33.906
	34.434	34.49	34.816	36.442		34.83	35.739	35.741	36.621	34.658	34.021
	34.411	34.488	34.817	36.465		34.816	35.74	35.731	36.58	34.628	34.086
	34.412	34.488	34.816	36.462		34.815	35.735	35.727	36.555	34.646	34.118
	34.411	34.462	34.806	36.452		34.831	35.738	35.72	36.571	34.679	34.121
	34.428	34.442	34.816	36.515		34.873	35.749	35.69	36.576	34.69	34.081
	34.476	34.439	34.83	36.553		34.895	35.765	35.649	36.714	34.751	34.165
	34.503	34.498	34.869	36.572		34.915	35.787	35.647	36.802	34.689	34.245
	34.502	34.559	34.87	36.538		34.94	35.804	35.669	36.83	34.611	34.234
	34.499	34.586	34.863	36.522		34.954	35.808	35.681	36.864	34.533	34.281
	34.489	34.6	34.866	36.513		34.968	35.811	35.704	36.951	34.505	34.32
	34.484	34.604	34.848	36.504		34.981	35.816	35.716	36.939	34.555	34.339
	34.476	34.591	34.88	36.529		34.964	35.815	35.714	37.009	34.692	34.359
	34.399	34.586	34.987	36.526		34.967	35.838	35.72	37.022	34.731	34.405
	34.415	34.589	35.126	36.526		34.955	35.853	35.729	37.02	34.721	34.484
	34.486	34.595	35.184	36.527		34.969	35.821	35.74	37.032	34.711	34.479
	34.507	34.589	35.174	36.523		35.017	35.793	35.729	37.052	34.8	34.479
	34.491	34.581	35.116	36.631		35.054	35.798	35.717	37.114	34.833	34.47
	34.522	34.576	35.192	36.717		35.048	35.825	35.708	37.124	34.859	34.474
	34.522	34.568	35.272	36.694		35.099	35.839	35.699	37.107	34.902	34.513
	34.532	34.58	35.301	36.641		35.3	35.863	35.713	37.119	34.963	34.52
	34.508	34.6	35.293	36.67		35.355	35.875	35.763	37.093	34.946	34.548
	34.474	34.572	35.226	36.718		35.42	35.879	35.798	37.041	34.981	34.558
	34.473	34.559	35.251	36.759		35.372	35.89	35.825	37.017	35.032	34.62
	34.485	34.546	35.223	36.78		35.33	35.894	35.841	37.007	35.235	34.62
	34.436	34.539	35.215	36.748		35.319	35.897	35.793	37.023	35.475	34.59
	34.446	34.529	35.255	36.725		35.317	35.9	35.756	37.006	35.684	34.508
	34.458	34.519	35.225	36.698		35.451	35.899	35.726	36.962	35.846	34.484
	34.444	34.526	35.194	36.665		35.615	35.888	35.7	37.01	35.978	34.421
	34.443	34.597	35.169	36.614		35.544	35.873	35.686	37.043	36.097	34.363
	34.444	34.664	35.139	36.582		35.618	35.883	35.67	37.023	36.077	34.383
	34.444	34.638	35.105	36.584		36.116	35.896	35.665	37.086	35.849	34.492
	34.434	34.697	35.062	36.55		36.089	35.916	35.665	37.082	35.646	34.533
	34.442	34.617	35.022	36.545		35.087	35.94	35.628	37.094	35.448	34.569
	34.455	34.576	34.995	36.571		35.041	35.964	35.604	37.111	35.339	34.568
	34.474	34.583	34.973	36.658		34.467	35.974	35.607	37.127	35.37	34.579
	34.497	34.62	34.937	36.643		34.545	36	35.666	37.109	35.313	34.609
	34.512	34.665	34.918	36.677		34.675	35.923	35.821	37.047	35.109	34.669
	34.51	34.666	34.899	36.676		34.811	35.988	35.989	36.94	34.938	34.673
	34.528	34.609	34.87	36.677		35.467	35.993	36.097	36.911	34.8	34.692
	34.548	34.632	34.83	36.709		35.459	35.973	36.134	36.955	34.718	34.7
	34.545	34.606	34.852	36.722		35.445	35.968	36.2	37.016	34.648	34.692
	34.564	34.61	34.869	36.688		35.427	35.975	36.274	37.066	34.556	34.7
	34.528	34.554	34.868	36.726		35.39	35.961	36.251	37.081	34.471	34.699
	34.485	34.48	34.868	36.685		35.344	35.963	36.254	37.084	34.412	34.713
	34.444	34.428	34.862	36.667		35.301	35.981	36.226	37.1	34.362	34.688
	34.432	34.393	34.854	36.677		35.264	36.024	36.199	37.095	34.319	34.728
	34.444	34.376	34.844	36.617		35.257	36.084	36.166	37.127	34.29	34.826
	34.472	34.325	34.803	36.534		35.235	36.122	36.114	37.145	34.27	34.844
	34.487	34.261	34.776	36.468		35.226	36.124	36.14	37.17	34.256	34.89
	34.486	34.28	34.748	36.417		35.211	36.083	36.128	37.092	34.24	34.901
	34.467	34.406	34.743	36.37		35.116	36.036	36.009	37.011	34.231	34.897
	34.467	34.513	34.745	36.318		35.187	35.995	35.969	36.937	34.221	34.915
	34.46	34.64	34.741	36.285		35.166	35.964	35.888	36.888	34.167	34.957
	34.449	34.721	34.746	36.26		35.145	35.935	35.865	37.004	34.104	34.944
	34.433	34.745	34.748	36.282		35.152	35.939	35.856	36.994	34.074	34.96
	34.436	34.785	34.746	36.31		35.175	35.957	35.814	36.941	34.066	34.979
	34.443	34.797	34.751	36.313		35.187	35.951	35.777	36.907	34.066	34.9
	34.44	34.759	34.753	36.309		35.192	35.93	35.743	36.855	34.069	34.838
	34.437	34.75	34.743	36.297		35.181	35.913	35.744	36.804	34.076	34.806
	34.446	34.745	34.748	36.266		35.195	35.9	35.874	36.774	34.087	34.787
	34.442	34.686	34.756	36.252		35.22	35.875	36.021	36.763	34.102	34.767
	34.436	34.762	34.755	36.252		35.236	35.887	36.096	36.744	34.118	34.733
	34.462	34.798	34.721	36.241		35.257	35.955	36.121	36.73	34.145	34.705
	34.484	34.823	34.711	36.241		35.278	36.018	36.124	36.73	34.157	34.682
	34.497	34.836	34.701	36.22		35.311	36.071	36.1	36.735	34.176	34.665
	34.513	34.915	34.695	36.197		35.32	36.109	36.032	36.739	34.163	34.627
	34.512	34.837	34.697	36.187		35.323	36.154	36.028	36.745	34.1	34.625
	34.511	34.768	34.711	36.206		35.331	36.205	36.103	36.739	34.028	34.597
	34.496	34.739	34.711	36.195		35.313	36.242	36.175	36.724	34.024	34.568
	34.494	34.727	34.714	36.193		35.351	36.229	36.226	36.718	34.072	34.512
	34.484	34.736	34.71	36.195		35.318	36.187	36.229	36.723	34.134	34.469
	34.471	34.714	34.705	36.168		35.231	36.156	36.186	36.713	34.285	34.492
	34.475	34.734	34.677	36.157		35.174	36.135	36.168	36.693	34.409	34.592
	34.458	34.681	34.637	36.142		35.147	36.129	36.2	36.681	34.578	34.572
	34.468	34.611	34.639	36.132		35.127	36.123	36.309	36.665	34.588	34.53
	34.443	34.626	34.643	36.113		35.087	36.11	36.241	36.668	34.573	34.608
	34.355	34.636	34.646	36.136		35.051	36.077	36.154	36.643	34.59	34.756
	34.295	34.631	34.645	36.189		35.031	36.053	36.037	36.625	34.628	34.924
	34.236	34.656	34.651	36.202		34.988	36.052	36.02	36.619	34.676	35.249
	34.186	34.666	34.656	36.203		34.954	36.038	36.012	36.619	34.728	35.471
	34.172	34.636	34.661	36.179		34.909	36.027	36.115	36.614	34.771	35.562
	34.118	34.582	34.678	36.145		34.938	36.01	36.08	36.611	34.795	35.456
	34.088	34.582	34.705	36.139		34.946	36	36.066	36.614	34.807	35.407
	34.069	34.613	34.725	36.144		34.966	35.988	36.106	36.607	34.834	35.387
	34.058	34.693	34.749	36.156		34.988	35.978	36.239	36.607	34.853	35.224
	34.025	34.796	34.759	36.192		35.021	35.965	36.351	36.596	34.868	35.036
	34.016	34.825	34.773	36.191		35.056	35.959	36.495	36.662	34.87	34.834
	34.028	34.976	34.776	36.18		35.094	35.949	36.602	36.823	34.805	34.716
	34.103	35.027	34.79	36.217		35.127	35.909	36.663	36.918	34.736	34.622
	34.053	35.029	34.759	36.201		35.169	35.896	36.67	36.904	34.66	34.479
	34.04	35.002	34.938	36.166		35.192	35.879	36.645	36.872	34.581	34.253
	34.042	35.026	35.14	36.199		35.201	35.871	36.596	36.855	34.515	34.049
	34.059	35.025	35.216	36.258		35.187	35.86	36.559	36.842	34.476	33.95
	34.075	35.035	35.213	36.248		35.165	35.847	36.465	36.837	34.424	34.024
	34.084	35.032	35.092	36.255		35.137	35.848	36.418	36.831	34.384	34.117
	34.09	35.049	35.094	36.256		35.106	35.848	36.344	36.833	34.351	34.389
	34.088	34.997	35.006	36.26		35.069	35.848	36.284	36.829	34.33	34.756
	34.1	35.04	35.096	36.28		35.002	35.828	36.247	36.827	34.327	35.076
	34.089	35.083	35.152	36.323		34.957	35.826	36.204	36.815	34.295	35.318
	34.097	35.181	35.215	36.318		34.926	35.84	36.194	36.803	34.247	35.504
	34.095	35.183	35.168	36.295		34.889	35.845	36.21	36.788	34.218	35.635
	34.083	35.154	35.12	36.272		34.822	35.85	36.229	36.777	34.199	35.746
	34.07	35.063	35.087	36.31		34.769	35.851	36.218	36.775	34.197	35.815
	34.053	35.03	35.104	36.303		34.727	35.85	36.204	36.772	34.196	35.855
	34.006	34.957	35.115	36.318		34.711	35.841	36.169	36.782	34.212	35.87
	33.938	34.913	35.148	36.352		34.718	35.842	36.132	36.75	34.227	35.874
	33.873	34.917	35.129	36.379		34.72	35.844	36.069	36.672	34.227	35.886
	33.807	34.92	35.115	36.373		34.708	35.851	36.022	36.614	34.225	35.87
	33.749	34.95	35.109	36.403		34.666	35.861	35.982	36.586	34.186	35.822
	33.709	35.085	35.105	36.426		34.634	35.875	35.946	36.555	34.147	35.761
	33.703	35.172	35.097	36.454		34.62	35.878	35.929	36.528	34.124	35.693
	33.668	35.181	35.225	36.417		34.627	35.888	35.905	36.505	34.131	35.615
	33.649	35.143	35.331	36.422		34.634	35.882	35.873	36.486	34.218	35.549
	33.602	35.099	35.388	36.408		34.606	35.888	35.841	36.472	34.251	35.493
	33.573	35.019	35.443	36.459		34.61	35.9	35.822	36.458	34.251	35.374
	33.54	34.879	35.524	36.515		34.62	35.901	35.805	36.458	34.246	35.214
	33.529	34.851	35.639	36.568		34.607	35.896	35.797	36.455	34.237	35.024
	33.529	34.804	35.696	36.573		34.614	35.911	35.773	36.456	34.229	34.952
	33.529	34.831	35.687	36.59		34.662	35.905	35.749	36.467	34.208	34.881
	33.532	34.793	35.811	36.628		34.707	35.879	35.727	36.45	34.185	34.828
	33.538	34.79	35.908	36.61		34.737	35.87	35.727	36.425	34.165	34.776
	33.538	34.812	35.911	36.647		34.749	35.842	35.694	36.432	34.146	34.731
	33.542	34.877	35.929	36.673		34.767	35.826	35.687	36.456	34.12	34.706
	33.545	34.933	35.92	36.725		34.779	35.822	35.707	36.45	34.107	34.689
	33.552	34.952	35.901	36.734		34.778	35.801	35.709	36.445	34.133	34.667
	33.566	34.87	35.859	36.761		34.766	35.802	35.716	36.447	34.123	34.655
	33.576	34.787	35.836	36.777		34.75	35.772	35.721	36.447	34.099	34.651
	33.584	34.743	35.81	36.765		34.711	35.761	35.716	36.446	34.071	34.661
	33.577	34.765	35.834	36.736		34.656	35.723	35.718	36.456	34.053	34.658
	33.58	34.843	35.795	36.758		34.648	35.685	35.693	36.472	34.034	34.661
	33.633	34.898	36	36.63		34.646	35.645	35.652	36.496	34.018	34.669
	33.745	34.883	36.052	36.57		34.66	35.651	35.618	36.529	34.001	34.705
	33.777	34.885	36.076	36.595		34.655	35.671	35.586	36.555	33.988	34.72
	33.798	34.855	36.071	36.597		34.703	35.673	35.564	36.574	33.983	34.728
	33.808	34.9	36.083	36.617		34.745	35.69	35.543	36.562	33.972	34.73
	33.835	34.905	36.093	36.589		34.779	35.712	35.517	36.561	33.957	34.717
	33.911	34.86	36.125	36.564		34.827	35.75	35.499	36.556	33.972	34.705
	33.974	34.8	36.141	36.564		34.863	35.774	35.485	36.545	34.057	34.697
	34.028	34.703	36.268	36.566		34.913	35.762	35.465	36.539	34.072	34.69
	34.067	34.608	36.149	36.669		34.965	35.76	35.462	36.531	34.056	34.68
	34.089	34.594	36.167	36.657		34.931	35.76	35.442	36.522	34.041	34.66
	34.103	34.634	36.218	36.675		34.925	35.775	35.41	36.517	34.038	34.628
	34.112	34.659	36.24	36.636		35.059	35.781	35.391	36.497	34.084	34.585
	34.124	34.57	36.25	36.63		35.156	35.799	35.385	36.478	34.125	34.558
	34.121	34.478	36.245	36.602		35.199	35.798	35.385	36.447	34.15	34.536
	34.15	34.56	36.223	36.591		35.25	35.809	35.389	36.415	34.172	34.508
	34.14	34.681	36.233	36.577		35.15	35.822	35.39	36.376	34.181	34.49
	34.137	34.785	36.127	36.536		35.091	35.813	35.393	36.346	34.217	34.468
	34.138	34.84	35.992	36.523		35.153	35.795	35.396	36.324	34.226	34.462
	34.141	34.814	35.897	36.52		35.125	35.778	35.393	36.299	34.226	34.457
	34.181	34.783	35.848	36.482		35.146	35.759	35.387	36.281	34.216	34.448
	34.179	34.778	35.792	36.447		35.174	35.726	35.367	36.269	34.196	34.437
	34.165	34.772	35.759	36.348		35.197	35.697	35.376	36.306	34.234	34.427
	34.17	34.745	35.741	36.298		35.282	35.661	35.403	36.439	34.236	34.421
	34.166	34.487	35.728	36.313		35.284	35.649	35.433	36.5	34.218	34.41
	34.158	34.298	35.729	36.326		35.192	35.653	35.469	36.496	34.201	34.402
	34.141	34.199	35.695	36.299		35.164	35.639	35.497	36.488	34.187	34.387
	34.114	34.151	35.759	36.275		35.151	35.651	35.507	36.488	34.18	34.384
	34.093	34.13	35.755	36.313		35.21	35.67	35.499	36.497	34.18	34.372
	34.071	34.12	35.776	36.32		35.209	35.68	35.496	36.504	34.169	34.365
	34.056	34.117	35.814	36.323		35.154	35.677	35.486	36.504	34.148	34.318
	34.038	34.108	35.83	36.34		35.13	35.669	35.466	36.5	34.122	34.263
	34.022	34.105	35.793	36.375		35.157	35.677	35.448	36.503	34.092	34.22
	34.003	34.105	35.78	36.414		35.149	35.71	35.455	36.505	34.04	34.185
	34.022	34.107	35.775	36.476		35.114	35.734	35.468	36.505	34.038	34.163
	34.037	34.116	35.813	36.532		35.138	35.754	35.474	36.506	34.033	34.152
	34.073	34.119	35.883	36.547		35.097	35.765	35.491	36.502	34.036	34.139
	34.106	34.137	36.061	36.525		35.006	35.775	35.5	36.507	34.097	34.141
	34.14	34.253	36.168	36.54		34.932	35.778	35.508	36.497	34.136	34.146
	34.165	34.345	36.28	36.527		34.869	35.783	35.507	36.492	34.147	34.15
	34.188	34.451	36.336	36.532		34.888	35.778	35.515	36.484	34.165	34.149
	34.188	34.529	36.211	36.511		34.951	35.773	35.515	36.477	34.197	34.148
	34.182	34.568	36.213	36.518		34.959	35.781	35.515	36.474	34.194	34.147
	34.198	34.59	36.241	36.561		34.917	35.775	35.499	36.476	34.193	34.143
	34.209	34.609	36.281	36.59		34.933	35.776	35.483	36.479	34.196	34.147
	34.224	34.624	36.281	36.598		34.851	35.772	35.451	36.474	34.186	34.153
	34.207	34.612	36.311	36.565		34.774	35.77	35.459	36.475	34.171	34.156
	34.182	34.602	36.313	36.548		34.832	35.761	35.482	36.468	34.194	34.158
	34.204	34.596	36.32	36.519		34.95	35.748	35.53	36.458	34.224	34.164
	34.214	34.588	36.357	36.515		34.968	35.724	35.572	36.428	34.232	34.161
	34.218	34.577	36.53	36.506		34.986	35.735	35.607	36.398	34.236	34.158
	34.23	34.577	36.465	36.477		35.001	35.779	35.622	36.392	34.232	34.162
	34.226	34.599	36.503	36.471		35.034	35.765	35.625	36.377	34.226	34.164
	34.203	34.613	36.499	36.496		35.092	35.739	35.612	36.379	34.225	34.167
	34.209	34.63	36.499	36.507		35.061	35.756	35.607	36.368	34.246	34.161
	34.244	34.685	36.497	36.485		35.006	35.793	35.571	36.368	34.259	34.156
	34.258	34.75	36.462	36.475		34.992	35.824	35.541	36.365	34.273	34.164
	34.257	34.722	36.487	36.472		35.053	35.839	35.531	36.36	34.297	34.204
	34.262	34.671	36.471	36.477		35.051	35.85	35.524	36.356	34.369	34.231
	34.264	34.617	36.414	36.5		35.059	35.847	35.524	36.365	34.511	34.251
	34.264	34.622	36.336	36.502		35.014	35.845	35.518	36.351	34.398	34.263
	34.274	34.67	36.306	36.519		35.014	35.834	35.527	36.344	34.462	34.248
	34.281	34.591	36.397	36.564		35.001	35.83	35.537	36.344	34.639	34.23
	34.376	34.51	36.387	36.567		35.01	35.825	35.535	36.345	34.735	34.233
	34.388	34.447	36.423	36.597		34.975	35.82	35.521	36.35	34.78	34.242
	34.373	34.401	36.459	36.602		35.023	35.826	35.5	36.344	34.707	34.249
	34.34	34.378	36.506	36.598		34.946	35.828	35.546	36.33	34.661	34.25
	34.328	34.366	36.457	36.622		35.009	35.838	35.473	36.305	34.693	34.248
	34.371	34.378	36.51	36.639		35.067	35.835	35.451	36.269	34.611	34.249
	34.397	34.39	36.574	36.68		34.698	35.826	35.44	36.248	34.562	34.256
	34.416	34.419	36.546	36.619		35.217	35.828	35.442	36.223	34.436	34.267
	34.462	34.502	36.492	36.596		35.249	35.825	35.453	36.207	34.33	34.264
	34.372	34.651	36.43	36.625		35.249	35.82	35.452	36.184	34.322	34.261
	34.344	34.773	36.374	36.626		35.256	35.832	35.464	36.168	34.349	34.258
	34.383	34.866	36.346	36.672		35.184	35.842	35.484	36.15	34.356	34.258
	34.416	34.931	36.243	36.719		35.237	35.844	35.533	36.129	34.31	34.27
	34.441	34.979	36.226	36.7		35.327	35.849	35.555	36.113	34.232	34.279
	34.371	35.033	36.271	36.709		35.315	35.839	35.562	36.09	34.154	34.283
	34.347	35.024	36.295	36.709		35.321	35.835	35.563	36.071	34.095	34.285
	34.356	35.019	36.331	36.724		35.296	35.847	35.567	36.055	34.191	34.287
	34.414	34.96	36.304	36.734		35.276	35.858	35.562	36.04	34.276	34.273
	34.503	34.898	36.258	36.752		35.214	35.854	35.558	36.049	34.317	34.144
	34.528	34.86	36.37	36.797		35.2	35.86	35.572	36.06	34.338	34.008
	34.503	34.837	36.384	36.85		35.171	35.878	35.553	36.085	34.34	33.913
	34.485	34.83	36.435	36.857		35.13	35.877	35.538	36.108	34.339	33.854
	34.476	34.855	36.473	36.854		35.231	35.871	35.519	36.17	34.4	33.81
	34.616	34.846	36.543	36.882		35.318	35.885	35.494	36.202	34.408	33.78
	34.654	34.766	36.598	36.912		35.514	35.875	35.493	36.209	34.376	33.776
	34.749	34.693	36.564	36.928		35.716	35.859	35.479	36.346	34.323	33.777
	34.827	34.657	36.485	36.976		35.837	35.858	35.47	36.389	34.345	33.775
	34.868	34.64	36.527	36.966		35.803	35.851	35.452	36.39	34.465	33.766
	34.869	34.629	36.582	36.988		35.831	35.841	35.444	36.38	34.46	33.756
	34.845	34.61	36.606	36.998		35.76	35.842	35.431	36.354	34.534	33.739
	34.804	34.607	36.479	36.963		35.82	35.847	35.43	36.339	34.554	33.702
	34.797	34.609	36.386	36.901		35.735	35.856	35.417	36.343	34.519	33.666
	34.777	34.614	36.25	36.857		35.612	35.862	35.388	36.339	34.514	33.646
	34.791	34.626	36.13	36.894		35.561	35.857	35.333	36.342	34.556	33.655
	34.792	34.637	36.021	36.859		35.47	35.863	35.398	36.338	34.51	33.664
	34.649	34.703	35.932	36.882		35.416	35.873	35.518	36.335	34.462	33.568
	34.437	34.763	35.844	36.993		35.466	35.879	35.493	36.337	34.43	33.457
	34.314	34.803	35.774	36.981		35.379	35.881	35.356	36.33	34.401	33.385
	34.176	34.84	35.723	36.938		35.301	35.881	35.317	36.327	34.366	33.341
	34.058	34.862	35.678	36.896		35.439	35.89	35.321	36.319	34.35	33.316
	33.959	34.853	35.618	36.997		35.598	35.894	35.308	36.323	34.626	33.3
	33.854	34.849	35.571	37.058		35.621	35.901	35.264	36.316	34.476	33.289
	33.761	34.794	35.526	37.025		35.566	35.906	35.233	36.316	34.554	33.29
	33.682	34.74	35.484	36.934		35.54	35.909	35.225	36.308	34.662	33.29
	33.598	34.75	35.45	36.867		35.593	35.923	35.24	36.304	34.618	33.298
	33.576	34.821	35.405	36.824		35.572	35.931	35.23	36.312	34.593	33.3
	33.519	34.821	35.376	36.761		35.537	35.935	35.266	36.317	34.594	33.298
	33.524	34.872	35.354	36.722		35.53	35.943	35.289	36.312	34.601	33.306
	33.504	34.909	35.415	36.671		35.475	35.946	35.25	36.319	34.609	33.318
	33.52	34.908	35.604	36.626		35.434	35.964	35.265	36.317	34.609	33.344
	33.544	34.926	35.639	36.577		35.454	35.967	35.32	36.315	34.683	33.602
	33.691	34.941	35.615	36.545		35.476	35.97	35.34	36.318	34.763	33.846
	33.698	34.901	35.574	36.515		35.448	35.96	35.296	36.316	34.807	33.936
	33.649	34.846	35.564	36.488		35.412	35.949	35.309	36.311	34.851	33.953
	33.587	34.812	35.558	36.447		35.412	35.946	35.306	36.304	34.887	33.8
	33.542	34.774	35.614	36.415		35.437	35.943	35.285	36.288	34.825	33.659
	33.518	34.712	35.666	36.368		35.267	35.946	35.363	36.301	34.808	33.572
	33.511	34.779	35.695	36.307		35.449	35.928	35.361	36.305	34.868	33.531
	33.51	34.77	35.716	36.271		35.456	35.91	35.337	36.311	34.896	33.503
	33.491	34.683	35.725	36.278		35.433	35.921	35.484	36.313	34.96	33.494
	33.733	34.652	35.731	36.283		35.46	35.92	35.666	36.307	34.962	33.486
	33.81	34.679	35.731	36.271		35.586	35.915	35.749	36.309	34.979	33.486
	33.816	34.654	35.724	36.268		35.665	35.918	35.716	36.316	34.962	33.495
	33.881	34.641	35.723	36.273		35.765	35.912	35.724	36.323	34.868	33.507
	34.132	34.627	35.715	36.255		35.66	35.906	35.739	36.333	34.779	33.493
	34.216	34.619	35.713	36.25		35.591	35.915	35.762	36.339	34.754	33.48
	34.275	34.631	35.704	36.25		35.655	35.939	35.769	36.334	34.73	33.49
	34.325	34.61	35.694	36.249		35.563	35.955	35.782	36.334	34.757	33.526
	34.349	34.602	35.685	36.233		35.584	35.966	35.821	36.335	34.75	33.545
	34.367	34.611	35.719	36.222		35.595	35.972	35.862	36.364	34.858	33.551
	34.24	34.6	35.747	36.219		35.537	35.981	35.851	36.375	34.865	33.558
	34.507	34.68	35.756	36.222		35.302	36	35.849	36.333	34.947	33.554
	34.553	34.748	35.747	36.198		35.098	36.003	35.887	36.303	34.948	33.567
	34.521	34.796	35.747	36.193		34.969	36.003	35.924	36.286	34.971	33.578
	34.373	34.74	35.731	36.181		34.839	36.008	35.962	36.262	34.985	33.58
	34.349	34.747	35.709	36.164		34.723	36.011	35.949	36.254	34.965	33.584
	34.442	34.724	35.679	36.149		34.627	36.006	35.962	36.24	34.899	33.596
	34.525	34.729	35.661	36.168		34.53	36.017	35.979	36.235	34.832	33.599
	34.62	34.667	35.651	36.208		34.469	36.026	36.023	36.22	34.724	33.66
	34.577	34.643	35.63	36.213		34.417	36.033	36.035	36.211	34.658	33.682
	34.626	34.72	35.63	36.203		34.356	36.037	36.058	36.214	34.702	33.695
	34.665	34.711	35.589	36.202		34.321	36.032	36.078	36.254	34.765	33.854
	34.714	34.738	35.564	36.197		34.251	36.04	36.126	36.291	34.878	33.929
	34.852	34.849	35.538	36.217		34.233	36.048	36.114	36.32	34.922	33.872
	34.776	34.876	35.549	36.214		34.236	36.045	36.21	36.286	34.878	33.834
	34.806	34.855	35.496	36.192		34.238	36.051	36.109	36.291	34.839	33.828
	34.798	34.79	35.471	36.168		34.227	36.045	36.102	36.293	34.848	33.875
	34.752	34.796	35.446	36.145		34.24	36.039	36.128	36.293	34.863	33.883
	34.743	34.804	35.425	36.116		34.209	36.021	36.141	36.294	34.89	33.894
	34.75	34.824	35.414	36.094		34.194	36.015	36.126	36.294	34.915	33.939
	34.829	34.891	35.394	36.088		34.174	36.019	36.121	36.297	34.809	34.009
	34.769	34.954	35.374	36.056		34.175	36.017	36.17	36.285	34.907	33.892
	34.656	35.008	35.355	36.028		34.163	36.026	36.176	36.286	34.907	33.779
	34.608	35.16	35.343	36.007		34.139	36.035	36.2	36.285	34.901	33.72
	34.548	35.334	35.344	35.973		34.14	36.014	36.22	36.249	34.966	33.685
	34.495	35.34	35.398	35.965		34.122	35.999	36.264	36.252	34.954	33.635
	34.542	35.231	35.459	35.965		34.253	36.003	36.312	36.255	34.911	33.617
	34.691	35.153	35.537	35.979		34.268	35.991	36.263	36.255	34.839	33.639
	34.954	35.101	35.531	35.99		34.259	35.987	36.281	36.254	34.791	33.746
	35.156	35.07	35.498	35.995		34.24	35.954	36.231	36.252	34.764	33.8
	35.289	35.115	35.47	36.005		34.24	35.956	36.216	36.226	34.737	33.81
	35.449	35.159	35.46	36.001		34.244	35.972	36.128	36.2	34.688	33.794
	35.535	35.166	35.452	36.005		34.245	36.052	36.049	36.176	34.689	33.764
	35.662	35.263	35.451	36.017		34.224	36.108	35.992	36.17	34.708	33.72
	35.761	35.257	35.435	36.024		34.223	36.037	35.94	36.162	34.741	33.681
	35.635	35.154	35.425	36.022		34.228	35.981	35.891	36.152	34.798	33.667
	35.674	35.223	35.418	36.02		34.233	36.022	35.86	36.142	34.832	33.661
	35.637	35.258	35.414	36.026		34.237	35.985	35.935	36.123	34.794	33.688
	35.603	35.291	35.423	36.025		34.245	35.979	36.026	36.093	34.762	33.899
	35.56	35.241	35.416	36.006		34.36	35.98	36.119	36.071	34.902	34.034
	35.573	35.189	35.315	35.98		34.501	35.981	36.139	36.005	34.982	34.092
	35.563	35.139	35.27	35.984		34.65	35.965	36.132	35.995	34.998	34.087
	35.527	35.124	35.213	35.964		34.82	35.957	36.311	35.984	35.003	34.074
	35.377	35.105	35.162	35.948		34.915	35.95	36.471	35.962	34.897	33.975
	35.247	35.113	35.135	35.93		35.02	35.952	36.577	36.027	34.807	33.876
	35.262	35.168	35.113	35.91		35.165	35.966	36.595	36.155	34.81	33.817
	35.073	35.137	35.092	35.899		35.26	35.964	36.579	36.228	34.846	33.785
	34.938	35.181	35.079	35.874		35.374	35.878	36.527	36.242	34.831	33.741
	34.841	35.26	35.048	35.819		35.305	35.823	36.498	36.24	34.913	33.733
	34.707	35.235	35.117	35.765		35.506	35.758	36.49	36.267	35.02	33.777
	34.721	35.256	35.211	35.725		35.526	35.706	36.466	36.241	35.357	33.751
	34.701	35.213	35.238	35.677		35.682	35.67	36.447	36.279	35.52	33.689
	34.631	35.174	35.227	35.625		35.877	35.633	36.441	36.308	35.399	33.63
	34.74	35.186	35.076	35.581		35.992	35.636	36.432	36.332	35.291	33.574
	34.871	35.208	35.078	35.567		35.946	35.605	36.424	36.314	35.311	33.532
	34.887	35.255	35.075	35.572		35.962	35.567	36.422	36.238	35.257	33.499
	34.714	35.204	35.062	35.551		35.94	35.568	36.427	36.23	35.148	33.482
	34.699	35.101	35.066	35.537		35.916	35.53	36.362	36.218	35.029	33.48
	34.77	35.075	35.061	35.536		35.82	35.498	36.301	36.285	34.99	33.517
	34.88	35.037	35.054	35.535		35.759	35.53	36.234	36.224	35.085	33.685
	34.904	34.96	35.04	35.546		35.719	35.61	36.183	36.158	35.071	33.757
	34.832	34.897	35.034	35.548		35.672	35.631	36.182	36.12	35.035	33.753
	34.717	34.833	35.029	35.555		35.655	35.645	36.179	36.205	35.113	33.808
	34.639	34.77	35.021	35.579		35.673	35.735	36.243	36.283	35.114	33.967
	34.585	34.8	35.009	35.677		35.583	35.727	36.292	36.334	35.059	34.063
	34.539	34.86	35.011	35.754		35.552	35.716	36.32	36.363	35.136	33.961
	34.5	34.907	35.005	35.82		35.454	35.683	36.354	36.394	35.255	33.889
	34.466	34.927	35.012	35.901		35.37	35.633	36.396	36.4	35.291	33.809
	34.481	34.94	35.009	35.89		35.411	35.587	36.36	36.396	35.395	33.744
	34.671	34.95	35.009	35.885		35.389	35.528	36.362	36.397	35.599	33.685
	34.786	34.955	35.007	35.912		35.334	35.488	36.268	36.475	35.798	33.668
	34.886	35.072	35.004	35.922		35.258	35.457	36.189	36.52	35.852	33.646
	34.94	35.118	35.016	35.938		35.192	35.428	36.132	36.503	35.866	33.644
	35.004	35.136	35.056	35.971		35.143	35.412	36.058	36.492	35.577	33.6
	34.998	35.175	35.098	36		35.089	35.41	35.992	36.449	35.311	33.568
	34.897	35.091	35.124	35.996		35.051	35.364	35.946	36.356	35.036	33.531
	34.803	35.016	35.124	35.984		35.029	35.314	35.914	36.292	34.948	33.553
	34.673	34.951	35.13	35.977		35.096	35.286	35.866	36.269	34.891	33.576
	34.694	34.882	35.129	35.973		35.22	35.276	35.842	36.263	34.718	33.592
	34.62	34.819	35.128	35.971		35.254	35.264	35.808	36.286	34.531	33.597
	34.535	34.761	35.126	35.995		35.252	35.205	35.79	36.279	34.444	33.596
	34.445	34.717	35.109	35.993		35.262	35.136	35.934	36.256	34.403	33.628
	34.394	34.688	35.083	36.021		35.232	35.062	35.945	36.267	34.41	33.617
	34.349	34.669	35.063	36.006		35.221	35.008	35.958	36.285	34.411	33.696
	34.329	34.648	35.044	35.959		35.169	34.971	35.973	36.358	34.415	33.675
	34.304	34.623	35.023	35.973		35.131	34.931	35.911	36.402	34.436	33.681
	34.282	34.603	35.002	35.997		35.103	34.909	35.843	36.43	34.456	33.677
	34.261	34.589	34.954	36.01		35.087	34.901	35.818	36.586	34.472	33.679
	34.237	34.574	34.913	36.037		35.065	34.896	35.801	36.545	34.497	33.699
	34.242	34.533	34.898	36.02		35.082	34.93	35.794	36.582	34.536	33.699
	34.296	34.515	34.854	35.991		35.057	34.961	35.795	36.597	34.55	33.842
	34.241	34.516	34.819	35.977		35.134	34.994	35.792	36.685	34.556	33.836
	34.204	34.519	34.797	36.027		35.232	35.036	35.781	36.695	34.567	33.824
	34.184	34.525	34.789	36.081		35.266	35.074	35.762	36.767	34.569	33.804
	34.168	34.593	34.797	36.119		35.296	35.114	35.738	36.774	34.557	33.83
	34.165	34.635	34.794	36.144		35.333	35.156	35.715	36.811	34.546	33.852
	34.181	34.65	34.799	36.123		35.347	35.248	35.696	36.713	34.542	33.862
	34.188	34.714	34.8	36.181		35.328	35.335	35.667	36.871	34.541	33.862
	34.181	34.799	34.802	36.224		35.314	35.361	35.654	36.829	34.54	33.914
	34.173	34.816	34.797	36.3		35.286	35.375	35.645	36.952	34.559	33.924
	34.17	34.837	34.814	36.353		35.255	35.392	35.634	36.99	34.569	33.93
	34.163	34.834	34.804	36.302		35.24	35.405	35.609	36.975	34.579	33.924
	34.178	34.825	34.811	36.302		35.218	35.415	35.589	36.994	34.585	33.97
	34.2	34.781	34.807	36.369		35.215	35.44	35.59	36.989	34.588	34.008
	34.228	34.754	34.795	36.423		35.259	35.458	35.574	37.008	34.588	33.978
	34.258	34.742	34.799	36.451		35.288	35.483	35.558	37.028	34.583	33.987
	34.229	34.742	34.792	36.43		35.355	35.488	35.544	37.004	34.585	34.058
	34.182	34.74	34.787	36.357		35.401	35.499	35.533	37.01	34.587	34.137
	34.14	34.751	34.781	36.386		35.426	35.51	35.528	37.043	34.594	34.155
	34.119	34.767	34.775	36.441		35.466	35.502	35.516	37.051	34.598	34.184
	34.118	34.782	34.78	36.417		35.469	35.474	35.498	37.07	34.579	34.145
	34.107	34.74	34.766	36.518		35.487	35.452	35.496	37.087	34.556	34.127
	34.1	34.701	34.76	36.579		35.505	35.39	35.484	37.066	34.538	34.369
	34.11	34.685	34.776	36.6		35.467	35.342	35.479	37.104	34.531	34.488
	34.095	34.678	34.781	36.598		35.371	35.312	35.482	37.133	34.521	34.5
	34.085	34.641	34.801	36.656		35.267	35.299	35.477	37.138	34.513	34.46
	34.075	34.614	34.822	36.69		35.173	35.3	35.436	37.122	34.509	34.534
	34.162	34.634	34.835	36.684		35.112	35.302	35.405	37.092	34.51	34.578
	34.264	34.662	34.847	36.675		35.066	35.331	35.503	36.95	34.503	34.596
	34.31	34.684	34.853	36.635		35.032	35.367	35.598	36.844	34.496	34.612
	34.343	34.682	34.841	36.552		34.995	35.404	35.577	36.769	34.494	34.594
	34.365	34.685	34.856	36.563		34.976	35.438	35.577	36.729	34.511	34.611
	34.398	34.688	34.855	36.547		34.948	35.482	35.581	36.668	34.527	34.64
	34.422	34.69	34.849	36.36		34.928	35.493	35.569	36.661	34.547	34.655
	34.437	34.676	34.838	36.498		34.895	35.512	35.574	36.685	34.537	34.596
	34.461	34.69	34.838	36.477		34.885	35.517	35.585	36.775	34.508	34.635
	34.472	34.816	34.836	36.465		34.872	35.519	35.594	36.823	34.49	34.646
	34.474	34.901	34.865	36.429		34.898	35.525	35.594	36.888	34.471	34.635
	34.487	35.035	34.858	36.406		34.927	35.524	35.592	36.915	34.455	34.632
	34.491	35	34.859	36.367		34.946	35.525	35.603	36.939	34.441	34.634
	34.493	34.878	34.846	36.364		34.961	35.518	35.6	36.941	34.426	34.6
	34.487	34.765	34.837	36.327		34.982	35.499	35.596	36.933	34.396	34.655
	34.478	34.674	34.82	36.285		34.975	35.48	35.599	36.907	34.362	34.71
	34.38	34.569	34.817	36.241		34.994	35.48	35.6	36.89	34.357	34.75
	34.301	34.47	34.806	36.206		35.006	35.481	35.587	36.92	34.379	34.863
	34.245	34.395	34.788	36.153		35.019	35.508	35.579	36.949	34.39	34.799
	34.198	34.355	34.778	36.124		35.038	35.584	35.557	36.982	34.399	34.825
	34.182	34.333	34.768	36.089		35.03	35.658	35.533	36.99	34.407	34.816
	34.199	34.308	34.771	36.052		35.003	35.705	35.519	36.953	34.42	34.797
	34.217	34.282	34.761	36.024		34.97	35.756	35.515	36.964	34.428	34.778
	34.239	34.256	34.758	35.989		34.989	35.79	35.509	36.956	34.438	34.72
	34.248	34.229	34.748	35.961		34.993	35.83	35.53	36.941	34.442	34.757
	34.244	34.208	34.739	35.922		35	35.842	35.533	36.926	34.452	34.827
	34.242	34.243	34.723	35.906		35.009	35.852	35.525	36.963	34.462	34.848
	34.249	34.324	34.701	35.894		35.027	35.854	35.531	36.988	34.466	34.963
	34.25	34.393	34.691	35.925		35.047	35.87	35.533	36.957	34.494	35.154
	34.292	34.532	34.67	35.943		35.062	35.887	35.539	36.927	34.521	35.169
	34.331	34.685	34.741	35.984		35.062	35.889	35.528	36.925	34.55	35.059
	34.319	34.746	34.914	36.033		35.065	35.92	35.515	36.959	34.58	34.992
	34.288	34.801	34.972	36.036		35.094	35.931	35.544	36.915	34.542	34.873
	34.246	34.863	34.987	36.037		35.102	35.94	35.541	36.858	34.479	34.761
	34.265	34.889	35.042	36.011		35.098	35.984	35.525	36.801	34.436	34.699
	34.271	34.903	35.097	36.05		35.101	36.052	35.524	36.717	34.411	34.621
	34.264	34.918	35.155	36.081		35.115	36.084	35.503	36.645	34.4	34.561
	34.253	34.934	35.15	36.087		35.098	36.105	35.488	36.63	34.4	34.573
	34.233	34.949	35.142	36.09		35.064	36.101	35.472	36.606	34.402	34.58
	34.24	34.958	35.126	36.082		35.052	36.083	35.462	36.587	34.406	34.608
	34.248	34.968	35.113	36.072		35.074	36.066	35.449	36.53	34.393	34.603
	34.3	34.967	35.098	36.059		35.08	36.141	35.443	36.535	34.369	34.585
	34.296	34.95	35.108	36.038		35.091	36.125	35.417	36.538	34.384	34.435
	34.268	34.901	35.113	36.027		35.076	36.107	35.43	36.511	34.408	34.289
	34.271	34.782	35.111	36.004		35.042	36.087	35.421	36.459	34.422	34.324
	34.325	34.689	35.089	35.976		35.014	36.073	35.425	36.428	34.422	34.379
		34.598	35.08	35.948		35.037	36.066	35.405	36.428	34.404	34.376
		34.604	35.04	35.916		34.993	36.056	35.406	36.491	34.389	34.376
		34.587	34.98	35.897		34.971	36.035	35.415	36.641	34.386	34.385
		34.523	34.966	35.877		34.919	36.035	35.414	36.614	34.394	34.409
		34.488	34.954	35.847		34.889	36.052	35.414	36.576	34.401	34.428
		34.502	34.957	35.819		34.838	36.062	35.403	36.591	34.406	34.441
		34.559	34.912	35.791		34.803	36.059	35.404	36.617	34.395	34.445
		34.707	34.919	35.754		34.767	36.062	35.408	36.69	34.398	34.466
		34.872	34.895	35.696		34.75	36.038	35.406	36.753	34.394	34.421
		34.841	34.927	35.663		34.711	36.036	35.396	36.739	34.392	34.377
		34.83	34.956	35.647		34.68	36.085	35.398	36.766	34.394	34.321
		34.868	34.987	35.634		34.684	36.114	35.401	36.804	34.392	34.28
		35.056	35.003	35.639		34.673	36.132	35.392	36.787	34.385	34.314
		35.257	35.022	35.648		34.687	36.123	35.396	36.794	34.376	34.326
		35.33	35.029	35.654		34.694	36.102	35.399	36.818	34.371	34.355
		35.288	35.042	35.653		34.712	36.091	35.384	36.911	34.375	34.335
		35.286	35.031	35.653		34.707	36.076	35.382	36.877	34.393	34.464
		35.242	35.039	35.651		34.701	36.059	35.382	36.826	34.373	34.463
		35.126	35.022	35.632		34.689	36.057	35.385	36.763	34.296	34.392
		35.01	34.995	35.62		34.665	36.053	35.387	36.783	34.237	34.365
		34.908	34.969	35.61		34.675	36.025	35.401	36.848	34.183	34.524
		34.818	34.951	35.596		34.655	36.046	35.393	36.912	34.134	34.653
		34.631	34.911	35.572		34.64	36.051	35.385	36.995	34.093	34.832
		34.447	34.888	35.565		34.624	36.057	35.367	37.063	34.077	34.953
		34.304	34.879	35.563		34.591	36.059	35.352	37.003	34.059	35.031
		34.208	34.889	35.56		34.585	36.086	35.347	36.851	34.041	35.075
		34.136	34.879	35.625		34.558	36.154	35.327	36.714	34.028	35.096
		34.084	34.894	35.648		34.422	36.194	35.331	36.646	34.02	35.125
		34.058	34.912	35.643		34.781	36.226	35.355	36.601	34.014	35.14
		34.056	34.934	35.638		35.287	36.229	35.368	36.611	34.005	35.153
		34.062	34.939	35.632		35.551	36.239	35.372	36.639	33.991	35.16
		34.09	34.941	35.634		35.616	36.254	35.367	36.686	33.984	35.206
		34.123	34.947	35.626		35.636	36.269	35.356	36.756	33.979	35.236
		34.149	34.955	35.607		35.614	36.256	35.358	36.79	33.953	35.245
		34.182	34.957	35.601		35.585	36.242	35.358	36.766	33.925	35.241
		34.204	34.955	35.592		35.56	36.255	35.368	36.738	33.99	35.236
		34.221	34.949	35.574		35.533	36.272	35.374	36.659	34.057	35.221
		34.264	34.943	35.598		35.507	36.294	35.37	36.734	34.045	35.204
		34.324	34.903	35.634		35.481	36.294	35.357	36.855	34.043	35.184
		34.323	34.893	35.631		35.468	36.274	35.361	36.785	34.071	35.163
		34.337	34.888	35.644		35.409	36.301	35.358	36.634	34.077	35.145
		34.323	34.889	35.638		35.356	36.268	35.348	36.567	34.287	35.125
		34.312	34.813	35.637		35.302	36.242	35.333	36.447	34.286	35.071
		34.322	34.778	35.627		35.267	36.208	35.339	36.363	34.378	34.997
		34.343	34.759	35.645		35.176	36.189	35.329	36.361	34.455	34.926
		34.362	34.746	35.68		35.12	36.216	35.317	36.385	34.443	34.871
		34.366	34.737	35.692		35.064	36.236	35.308	36.45	34.488	34.784
		34.364	34.754	35.678		35.07	36.253	35.314	36.526	34.46	34.573
		34.369	34.75	35.656		35.044	36.263	35.314	36.54	34.237	34.331
		34.378	34.759	35.651		35.048	36.275	35.312	36.557	34.047	34.103
		34.396	34.833	35.625		35.065	36.281	35.329	36.537	33.918	34.027
		34.409	34.954	35.577		35.073	36.305	35.337	36.564	33.842	34.062
		34.434	35.025	35.536		35.062	36.334	35.353	36.568	33.81	34.037
		34.449	35.056	35.493		35.044		35.358	36.526	33.798	34.014
		34.456	34.982	35.479		35.024		35.333	36.501	33.806	34.012
		34.469	34.982	35.465		35.018		35.334	36.469	33.834	34.024
		34.477	34.905	35.461		35.012		35.329	36.426	33.854	34.044
		34.49	34.918	35.493		35.014		35.342	36.383	33.952	34.067
		34.504	34.941	35.501		35.005		35.335	36.336	33.991	34.097
		34.51	34.972	35.513		34.994		35.328	36.305	33.965	34.125
		34.523	34.982	35.513		35.007		35.324	36.283	33.931	34.139
		34.536	35.07	35.512		35.008		35.328	36.261	33.911	34.151
		34.582	35.196	35.508		35.022		35.333	36.242	33.901	34.173
		34.586	35.218	35.511		35.016		35.333	36.247	33.916	34.192
		34.589	35.215	35.51		34.997		35.333	36.261	33.907	34.21
		34.582	35.232	35.495		34.995		35.331	36.24	33.896	34.17
		34.594	35.291	35.486		34.992		35.318	36.216	33.883	34.12
		34.631	35.279	35.479		34.992		35.307	36.213	33.868	34.074
		34.634	35.241	35.463		34.982		35.294	36.201	33.857	34.037
		34.646	35.239	35.471		34.976		35.318	36.193	33.862	34
		34.671	35.281	35.489		34.968		35.389	36.177	33.848	33.97
		34.696	35.281	35.497		34.971		35.495	36.154	33.788	33.949
		34.709	35.181	35.502		34.949		35.472	36.123	33.691	34.001
		34.695	35.214	35.522		34.961		35.468	36.093	33.741	34.137
		34.696	35.295	35.556		34.941		35.429	36.071	33.802	34.222
		34.708	35.322	35.582		34.922		35.329	36.025	33.696	34.264
		34.717	35.305	35.633		34.913		35.304	35.992	33.638	34.28
		34.737	35.303	35.625		34.906		35.289	35.969	33.579	34.288
		34.735	35.317	35.628		34.956		35.259	35.957	33.492	34.298
		34.702	35.255	35.624		35.022		35.238	35.954	33.516	34.334
		34.633	35.213	35.622		35.085		35.304	35.948	33.564	34.308
		34.579	35.427	35.613		35.113		35.3	35.922	33.492	34.234
		34.552	35.489	35.608		35.12		35.277	35.915	33.417	34.185
		34.542	35.445	35.628		35.14		35.315	35.91	33.415	34.134
		34.534	35.437	35.62		35.164		35.412	35.916	33.39	34.061
		34.54	35.534	35.602		35.157		35.554	35.913	33.452	34.004
		34.517	35.616	35.613		35.152		35.66	35.915	33.385	33.962
		34.502	35.733	35.584		35.154		35.634	35.911	33.365	33.903
		34.495	35.703	35.558		35.149		35.711	35.908	33.364	33.851
		34.495	35.605	35.544		35.145		35.736	35.909	33.415	33.845
		34.496	35.544	35.541		35.159		35.858	35.895	33.452
		34.489	35.47	35.537		35.18		35.909	35.891	33.461
		34.481	35.372	35.532		35.19		35.829	35.881	33.545
		34.479	35.327	35.526		35.198		35.897	35.873	33.619
		34.471	35.28	35.528		35.199		35.934	35.878	33.621
		34.47	35.205	35.533		35.249		35.969	35.878	33.623
		34.467	35.169	35.538		35.202		35.87	35.877	33.669
		34.464	35.094	35.541		35.176		35.894	35.873	33.744
		34.459	35.057	35.532		35.157		35.902	35.873	33.756
		34.45	35.013	35.535		35.16		35.924	35.883	33.718
		34.446	34.986	35.524		35.117		35.902	35.877	33.702
		34.44	34.979	35.525		35.138		35.923	35.874	33.72
		34.428	34.992	35.514		35.135		35.917	35.868	33.746
		34.418	35.033	35.488		35.12		35.921	35.858	33.767
		34.406	35.053	35.489		35.101		35.902	35.853	33.895
		34.399	35.05	35.477		35.091		35.848	35.857	33.886
		34.384	35.059	35.468		35.092		35.868	35.846	33.938
		34.369	35.061	35.449		35.042		35.761	35.839	33.984
		34.37	35.069	35.435		34.958		35.804	35.834	33.996
		34.37	35.066	35.432		34.909		35.905	35.855	34.024
		34.436	35.059	35.425		34.872		35.9	36.004	34.043
		34.463	35.062	35.418		34.843		35.852	36.145	34.031
		34.432	35.056	35.416		34.86		35.957	36.165	33.825
		34.382	35.054	35.411		34.88		36.002	36.131	33.802
		34.343	35.049	35.506		34.894		36.015	36.081	33.801
		34.312	35.05	35.508		34.918		35.952	36.049	33.852
		34.289	35.061	35.491		34.929		35.905	36.019	33.938
		34.273	35.054	35.496		34.937		35.914	35.999	34.022
		34.26	35.019	35.491		34.94		35.906	35.97	34.111
		34.259	35.015	35.506		34.973		35.883	35.955	34.197
		34.249	35.012	35.525		34.943		35.851	35.946	34.238
		34.244	35.018	35.524		34.947		35.842	35.925	34.312
		34.237	35.038	35.569		34.941		35.843	35.911	34.368
		34.228	35.04	35.623		34.951		35.844	35.889	34.331
		34.217	35.052	35.681		34.965		35.857	35.884	34.316
		34.199	35.053	35.636		34.96		35.857	35.884	34.319
		34.187	35.062	35.604		34.934		35.875	35.888	34.328
		34.245	35.052	35.562		34.936		35.884	35.884	34.336
		34.257	35.046	35.542		34.893		35.89	35.871	34.34
		34.242	35.031	35.579		34.848		35.896	35.871	34.345
		34.36	35.019	35.601		34.785		35.852	35.872	34.356
		34.641	35.009	35.613		34.8		35.82	35.868	34.371
		34.709	35.01	35.619		34.784		35.771	35.863	34.366
		34.731	34.995	35.625		34.746		35.759	35.859	34.352
		34.665	34.979	35.649		34.698		35.738	35.856	34.347
		34.61	34.946	35.649		34.693		35.727	35.852	34.345
		34.574	34.903	35.629		34.695		35.729	35.837	34.333
		34.553	34.86	35.619		34.702		35.723	35.822	34.333
		34.558	34.846	35.607		34.7		35.716	35.812	34.314
		34.581	34.838	35.59		34.71		35.722	35.803	34.296
		34.586	34.85	35.589		34.726		35.707	35.787	34.289
		34.58	34.852	35.575		34.741		35.735	35.774	34.292
		34.57	34.865	35.565		34.752		35.736	35.768	34.293
		34.535	34.882	35.555		34.764		35.742	35.765	34.298
		34.483	34.86	35.551		34.772		35.739	35.759	34.307
		34.446	34.858	35.592		34.799		35.738	35.734	34.313
		34.413	34.869	35.593		34.796		35.735	35.7	34.318
		34.384	34.885	35.588		34.746		35.722	35.707	34.32
		34.36	34.902	35.582		34.705		35.722	35.713	34.316
		34.346	34.914	35.574		34.673		35.706	35.728	34.311
		34.329	34.911	35.567		34.653		35.704	35.743	34.319
		34.318	34.903	35.56		34.636		35.687	35.719	34.345
		34.318	34.906	35.546		34.619		35.681	35.726	34.361
		34.312	34.908	35.521		34.61		35.658	35.726	34.377
		34.305	34.885	35.474		34.597		35.647	35.73	34.376
		34.305	34.91	35.443		34.634		35.627	35.738	34.405
		34.302	34.924	35.4		34.919		35.621	35.731	34.591
		34.307	34.923	35.336		35.096		35.607	35.716	34.73
		34.315	34.917	35.317		35.16		35.589	35.706	34.83
		34.329	34.91	35.308		35.197		35.613	35.688	34.894
		34.355	34.897	35.331		35.204		35.616	35.689	34.933
		34.308	34.891	35.321		35.208		35.605	35.685	34.952
		34.271	34.874	35.308		35.207		35.603	35.668	34.964
		34.257	34.883	35.32		35.22		35.555	35.685	34.973
		34.273	34.881	35.404		35.306		35.527	35.67	34.975
		34.288	34.886	35.451		35.325		35.505	35.679	35
		34.279	34.876	35.457		35.33		35.483	35.691	35.027
		34.298	34.879	35.495		35.325		35.461	35.697	35.054
		34.384	34.891	35.537		35.305		35.454	35.701	35.063
		34.419	34.887	35.536		35.299		35.449	35.696	35.071
		34.404	34.895	35.531		35.291		35.455	35.701	35.073
		34.427	34.842	35.501		35.217		35.46	35.689	35.085
		34.396	34.846	35.506		35.14		35.448	35.691	35.096
		34.37	34.825	35.573		35.05		35.442	35.689	35.093
		34.441	34.817	35.604		34.982		35.438	35.68	35.092
		34.489	34.826	35.586		34.932		35.434	35.662	35.083
		34.4	34.834	35.635		34.898		35.439	35.645	35.068
		34.379	34.815	35.674		34.845		35.42	35.633	34.916
		34.348	34.822	35.731		34.805		35.419	35.616	34.763
		34.336	34.813	35.723		34.778		35.411	35.606	34.648
		34.313	34.81	35.694		34.769		35.416	35.608	34.574
		34.418	34.817	35.706		34.709		35.423	35.593	34.519
		34.501	34.804	35.74		34.682		35.432	35.599	34.479
		34.458	34.81	35.726		34.741		35.446	35.592	34.461
		34.39	35.074	35.715		34.779		35.441	35.571	34.456
		34.405	35.042	35.747		34.782		35.453	35.598	34.444
		34.421	35.002	35.757		34.794		35.458	35.586	34.436
		34.399	34.958	35.782		34.803		35.455	35.579	34.433
		34.375	34.933	35.776		34.798		35.46	35.573	34.437
		34.334	34.94	35.838		34.803		35.456	35.594	34.432
		34.333	34.928	35.944		34.801		35.451	35.653	34.426
		34.385	34.889	35.977		34.825		35.443	35.802	34.425
		34.401	34.971	36.038		34.841		35.415	35.848	34.431
		34.333	35.036	35.99		34.877		35.404	35.945	34.435
		34.315	35.049	35.954		34.914		35.374	35.962	34.447
		34.34	35.063	35.936		34.943		35.352	35.939	34.438
		34.369	35.063	35.921		35.002		35.334	35.837	34.389
		34.326	35.057	35.977		34.966		35.319	35.769	34.352
		34.253	35.051	36.058		34.994		35.304	35.744	34.339
		34.212	35.026	36.04		35.011		35.309	35.748	34.34
		34.279	35.011	36.014		35.007		35.312	35.759	34.328
		34.441	35.062	35.983		35		35.31	35.762	34.317
		34.498	35.062	36.013		34.975		35.336	35.761	34.3
		34.526	35.106	36.031		34.991		35.407	35.783	34.281
		34.564	35.112	36.062		34.993		35.443	35.77	34.266
		34.616	35.141	36.079		34.967		35.46	35.773	34.273
		34.662	35.18	36.146		34.949		35.483	35.76	34.286
		34.729	35.219	36.194		34.918		35.489	35.833	34.262
		34.678	35.224	36.232		34.908		35.492	35.948	34.239
		34.578	35.215	36.188		34.889		35.497	35.915	34.224
		34.691	35.187	36.188		34.871		35.506	35.911	34.195
		34.738	35.242	36.162		34.855		35.501	35.952	34.17
		34.69	35.345	36.138		34.852		35.494	35.927	34.167
		34.708	35.29	36.133		34.844		35.489	35.94	34.166
		34.708	35.377	36.117		34.839		35.478	35.862	34.158
		34.605	35.555	36.126		34.838		35.472	36.001	34.146
		34.565	35.645	36.142		34.824		35.479	36.027	34.134
		34.495	35.667	36.13		34.783		35.483	36.029	34.128
		34.505	35.608	36.168		34.768		35.435	35.995	34.136
		34.489	35.598	36.165		34.749		35.405	35.962	34.193
		34.46	35.599	36.148		34.745		35.438	35.91	34.201
		34.516	35.584	36.188		34.709		35.476	35.894	34.201
		34.647	35.652	36.189		34.693		35.587	35.881	34.2
