# Supplementary material for: Dysfunctions of the paraventricular hypothalamic nucleus induce hypersomnia in mice
Source: eLife. 2021 Nov 17;10:e69909. doi: 10.7554/eLife.69909 (PMC8631797; doi:10.7554/eLife.69909)
Supplement: Figure 4—source data 1. [file elife-69909-fig4-data1.xlsx]

## Sheet: Figure 4D
Figure 4D
	mCherry		1	2	3	4	5
		1 Hz	60	45	52	72	68
		5 Hz	71	52	63	82	65
		10 Hz	83	52	74	66	71
		20 Hz	60	55	63	82	65
	ChR2		1	2	3	4	5
		1 Hz	47	42	51	60	55
		5 Hz	15	8	17	12	15
		10 Hz	1.5	1.5	1	1.5	1
		20 Hz	1	0.5	1	0.5	1

## Sheet: Figure 4F
Figure 4F
		n=5
		mCherry	Wake	1	2	3	4	5			mCherry	NREM
			08:00:00	0.33	9.93	0	9.53	4.93				08:00:00	0	9.13	10	0.47	5.07
			08:10:00	6.33	9.93	0.27	10	4				08:10:00	0.07	2.2	8.73	0	6
			08:20:00	9.27	9.53	0.73	10	2.07				08:20:00	0.33	0.73	7.13	0	7.93
			08:30:00	8.67	2.2	4.47	7.47	2.53				08:30:00	7.53	1.33	4.47	2.53	7.47
			08:40:00	1.2	3.2	0.6	2.73	2.93				08:40:00	8	7.87	8.93	7.27	7.07
			08:50:00	3.93	1.93	3.6	5.93	1.8				08:50:00	8.07	5.6	5.93	4.07	8.2
			09:00:00	10	0.93	4.07	0.27	1.67				09:00:00	6.8	0	5.93	7.8	8.33
			09:10:00	6.07	1.4	6.2	0.2	2.53				09:10:00	7.8	3.93	3.8	8.6	7.47
			09:20:00	1.07	2.53	1.33	0.2	3.07				09:20:00	4.67	8.93	7.87	7.33	6.93
			09:30:00	1.4	1	0.2	0.4	0.87				09:30:00	8.93	7.07	7.07	9.6	8.4
			09:40:00	1.13	1.13	0.47	2.13	1				09:40:00	8.4	6.27	7.67	5.47	9
			09:50:00	0.13	1.8	0.67	1	1.27				09:50:00	7.47	8.67	7.8	9	8.73
			10:00:00	0.53	6.87	5.4	1.53	1.93				10:00:00	1.6	6.2	4.6	8.4	8.07
			10:10:00	7.67	9.53	0.4	1.07	1.87				10:10:00	0.4	2.33	8.53	8.27	8.13
			10:20:00	3.53	4.93	0.27	1.07	3.13				10:20:00	0	0.47	8.13	7.67	6.87
			10:30:00	7.32	6.47	3.4	1.33	0.47				10:30:00	3.53	0	5	6.73	9.53
			10:40:00	6.47	1.67	5.93	1.53	1.47				10:40:00	8.33	3.53	4.07	6.8	7.87
			10:50:00	0	1.93	0.2	0.93	1.47				10:50:00	7.6	10	8.93	8.27	8.53
		ChR2		1	2	3	4	5			ChR2
			08:00:00	5.6	9.13	4.13	4.73	1.93				08:00:00	1.87	0.87	5.87	5.27	7.87
			08:10:00	10	9.13	0.73	5.87	0.33				08:10:00	0	0.87	6.73	4.13	9.6
			08:20:00	9.33	3.27	0.53	0.47	6.47				08:20:00	0.67	6.73	9.13	9.53	3.53
			08:30:00	5.33	0.27	0.87	2.2	6.33				08:30:00	4.67	9.73	8.2	5.87	3.67
			08:40:00	1	2.33	0.47	8.53	8.4				08:40:00	9	6.47	7	1.47	1.6
			08:50:00	2.53	7.6	2.47	8.4	8.13				08:50:00	6.73	2.4	7.27	1.6	1.87
			09:00:00	10	9.87	9.87	6.07	9.93				09:00:00	0	0.13	0.13	3.93	0
			09:10:00	9.93	8.13	10	10	10				09:10:00	0.07	1.87	0	0	0
			09:20:00	8.6	8.13	9.93	10	10				09:20:00	1.4	1.87	0	0	0
			09:30:00	6.27	8.33	9.8	10	10				09:30:00	3.73	1.67	0	0	0
			09:40:00	7	7.07	10	10	10				09:40:00	3	2.93	0	0	0
			09:50:00	5.6	7.53	9.93	10	10				09:50:00	4.4	2.47	0	0	0
			10:00:00	4	9.67	9.87	10	10				10:00:00	6	0.33	0.13	0	0
			10:10:00	1.2	9.87	2.2	10	9				10:10:00	7	0.13	7.8	0	1
			10:20:00	0.93	9.93	0.8	10	5.33				10:20:00	7	0.07	7.13	0	4.67
			10:30:00	0.87	3.6	0.33	10	6				10:30:00	7.87	6.4	9.4	0	4
			10:40:00	4.93	0.33	5.47	6.53	8				10:40:00	2	9.67	4.13	3.47	2
			10:50:00	4.47	0.33	3.47	8.27	4.93				10:50:00	5.53	7.33	6.13	1.73	5.07
