# Supplementary material for: Dysfunctions of the paraventricular hypothalamic nucleus induce hypersomnia in mice
Source: eLife. 2021 Nov 17;10:e69909. doi: 10.7554/eLife.69909 (PMC8631797; doi:10.7554/eLife.69909)
Supplement: Figure 5—source data 2. [file elife-69909-fig5-data2.xlsx]

## Sheet: Figure supplement 7B
Figure supplement 7B
n=6	PVH-PB
	latency	amplitude
	1.7	121
	3.7	87
	2.8	111.1
	2.5	95
	1.5	62
	2.4	103

## Sheet: Figure supplement 7F
Figure supplement 7F
n=8	PVH-LSv
	latency	amplitude
	1.9	39
	1.8	48
	2.3	196.5
	2.4	39.1
	2	202.8
	2.5	43.9
	3.7	45
	2.3	105.6
