# Supplementary material for: Dysfunctions of the paraventricular hypothalamic nucleus induce hypersomnia in mice
Source: eLife. 2021 Nov 17;10:e69909. doi: 10.7554/eLife.69909 (PMC8631797; doi:10.7554/eLife.69909)
Supplement: Figure 6—source data 1. [file elife-69909-fig6-data1.xlsx]

## Sheet: Figure 6C
Figure 6C
vehicle	Wake								vehicle	NREM															\
	1	2	3	4	5	6	7			1	2	3	4	5	6	7
07:00:00	22.14	49.62	36.18	21.66	29.58	24.06	24.78		07:00:00	33.12	10.38	23.82	35.52	26.46	30.84	30.12
08:00:00	39.66	58.8	21.6	21.66	11.04	14.46	16.14		08:00:00	18.12	1.2	33.84	35.82	38.76	37.2	40.32
09:00:00	24.84	31.14	44.52	40.38	29.94	24.06	27.48		09:00:00	33.42	27.54	15.48	19.62	29.34	33.12	31.14
10:00:00	14.58	46.62	10.32	16.08	6.84	5.28	7.56		10:00:00	37.98	13.38	46.86	43.92	43.8	46.38	44.34
11:00:00	14.4	42.42	40.38	18.12	6.78	2.28	7.08		11:00:00	37.02	16.02	18.54	39.84	42.6	48.06	45
12:00:00	5.82	29.88	15.48	39.72	12.78	17.94	24.66		12:00:00	43.74	28.26	40.56	17.46	38.04	36.12	30.24
13:00:00	33.96	28.56	43.44	22.98	24.18	11.82	8.16		13:00:00	23.52	28.92	16.32	33.42	31.08	41.82	44.16
14:00:00	7.68	37.08	28.62	23.4	21.66	27.78	17.4		14:00:00	42.18	20.64	29.28	30.24	30	28.14	34.98
15:00:00	25.38	26.04	41.04	25.14	10.14	31.2	31.26		15:00:00	26.64	29.4	16.98	31.62	40.44	21.66	25.14
16:00:00	27.06	35.28	45.18	22.62	41.34	18.66	12.96		16:00:00	28.38	23.46	13.98	33	14.28	32.82	41.46
17:00:00	16.98	19.32	39.84	27.36	16.98	22.98	34.86		17:00:00	34.44	36.72	19.08	27.42	36	32.22	21.78
18:00:00	40.62	29.16	35.28	34.74	41.52	30.48	28.02		18:00:00	15.48	30.6	22.38	22.14	15.66	26.16	28.26
19:00:00	41.82	32.4	56.22	59.76	60	52.74	60		19:00:00	17.22	27.18	3.72	0.24	0	7.26	0
20:00:00	46.26	29.34	48.06	48.78	58.56	41.58	60		20:00:00	12.06	30.66	11.76	11.22	1.44	16.68	0
21:00:00	56.58	32.4	40.62	19.26	56.52	45.42	56.16		21:00:00	2.4	27.48	16.2	35.46	3.48	12.66	3.84
22:00:00	52.44	27.84	34.74	45.48	59.82	51.66	52.62		22:00:00	7.56	30.42	25.26	12.42	0.18	6.6	5.58
23:00:00	60	38.4	55.92	10.8	58.8	59.58	60		23:00:00	0	21.6	4.08	43.32	1.2	0.42	0
1900-01-01	59.88	38.16	42.78	50.16	32.52	57.36	60		1900-01-01	0.12	20.94	14.46	9.48	24.18	2.64	0
1900-01-01 01:00:00	42.66	33.54	13.62	14.64	18.66	5.46	54.54		1900-01-01 01:00:00	17.34	25.56	43.44	40.38	32.46	46.08	5.46
1900-01-01 02:00:00	45.24	39.48	47.46	25.8	13.44	17.82	18.42		1900-01-01 02:00:00	13.62	16.74	10.98	28.86	37.02	35.04	35.64
1900-01-01 03:00:00	34.26	32.04	17.34	13.74	30.84	55.62	39.18		1900-01-01 03:00:00	25.74	26.4	41.04	38.82	23.46	4.38	18.42
1900-01-01 04:00:00	56.28	34.62	46.74	41.94	51.06	19.68	29.04		1900-01-01 04:00:00	3.72	22.74	11.58	16.86	6	31.26	27.96
1900-01-01 05:00:00	43.38	33.78	55.86	29.28	59.94	46.26	40.86		1900-01-01 05:00:00	14.28	23.4	4.14	27.96	0.06	11.46	15.36
1900-01-01 06:00:00	32.94	58.98	42.24	34.26	59.82	37.68	60		1900-01-01 06:00:00	24.72	1.02	16.92	24.18	0.18	21.36	0
CNO	W								CNO	S																\
	1	2	3	4	5	6	7			1	2	3	4	5	6	7
07:00:00	15.54	39.36	28.38	39.72	26.16	33.6	31.26		07:00:00	36.96	19.62	31.62	19.56	30.12	23.16	26.64
08:00:00	21.42	51.48	34.2	31.8	12.84	14.28	13.2		08:00:00	33.54	8.52	22.98	26.04	37.62	37.44	41.64
09:00:00	50.76	49.68	50.58	48.42	41.52	33.36	57.78		09:00:00	9.24	10.32	9.42	11.58	17.94	26.64	2.22
10:00:00	7.86	18.06	13.8	40.98	6.48	5.58	15		10:00:00	44.22	41.28	43.08	18.12	42.6	43.74	43.44
11:00:00	25.38	19.26	11.04	17.04	7.62	3.54	11.58		11:00:00	30.66	39.24	48.06	35.46	42.18	45.66	41.46
12:00:00	19.32	19.68	21.24	25.38	39.6	21.42	17.88		12:00:00	34.62	39.6	35.52	31.2	15.54	33.18	38.58
13:00:00	19.32	24.48	35.16	36	25.62	22.8	30		13:00:00	33.06	34.26	23.16	20.22	29.34	30.84	23.04
14:00:00	7.86	45	22.32	31.74	49.32	16.14	11.58		14:00:00	41.88	14.46	35.28	25.68	8.64	34.08	39.48
15:00:00	20.34	29.82	44.58	24.84	6.54	10.56	34.62		15:00:00	34.44	25.68	15.36	30.36	43.8	41.28	23.76
16:00:00	36.78	39.12	16.32	44.34	16.02	22.26	21.84		16:00:00	18.12	16.56	41.52	15.66	33.96	30.84	33.12
17:00:00	18.54	40.2	30.96	21.78	40.14	19.98	19.92		17:00:00	33.12	16.26	24.12	35.58	16.68	34.14	37.38
18:00:00	28.02	30.06	29.94	41.64	30.84	46.26	41.34		18:00:00	29.4	26.16	27.66	15.66	23.34	10.68	17.94
19:00:00	40.38	49.68	58.98	56.64	59.94	54.42	60		19:00:00	16.86	8.76	1.02	3.24	0.06	5.58	0
20:00:00	60	52.26	47.34	45.54	49.92	39.36	59.94		20:00:00	0	4.92	10.68	14.46	9.18	19.14	0.06
21:00:00	47.16	38.64	47.58	37.44	59.34	30.12	44.64		21:00:00	12.84	17.04	12.42	18.78	0.66	24.06	13.8
22:00:00	52.98	46.32	37.02	17.76	59.64	43.26	55.08		22:00:00	4.68	11.58	20.34	36.24	0.36	14.94	4.26
23:00:00	59.94	47.64	44.94	47.28	43.14	59.34	60		23:00:00	0.06	11.46	12.48	11.58	14.22	0.66	0
1900-01-01	31.92	31.8	47.34	15.24	15.54	58.44	60		1900-01-01	26.04	22.86	12.66	39.54	36.78	1.56	0
1900-01-01 01:00:00	14.82	44.88	40.14	24.6	27.12	16.56	60		1900-01-01 01:00:00	41.76	14.52	18.36	29.04	26.04	38.16	0
1900-01-01 02:00:00	57.6	37.62	31.32	32.04	14.16	19.86	33.6		1900-01-01 02:00:00	2.4	19.2	28.08	23.76	38.22	34.08	24.72
1900-01-01 03:00:00	18.24	42.36	36.42	29.28	55.62	51.84	12.36		1900-01-01 03:00:00	38.52	14.76	21.78	26.34	4.14	8.16	38.82
1900-01-01 04:00:00	53.46	47.34	29.88	32.58	57.54	11.58	20.76		1900-01-01 04:00:00	6.54	10.68	28.44	24.48	2.46	39.54	32.28
1900-01-01 05:00:00	48.54	44.58	60	51.54	36.84	40.38	40.8		1900-01-01 05:00:00	11.46	13.8	0	6.6	20.46	16.14	16.44
1900-01-01 06:00:00	27.72	49.26	59.82	28.02	49.56	56.16	56.16		1900-01-01 06:00:00	29.4	8.64	0.18	26.64	9.96	3.84	3.84

## Sheet: Figure 6F
Figure 6F
vehicle	Wake							vehicle	NREM
	1	2	3	4	5	6			1	2	3	4	5	6
07:00:00	21.06	30.18	28.02	32.16	14.58	44.04		07:00:00	34.8	28.32	31.98	27.84	37.98	14.4
08:00:00	31.02	15.78	40.92	7.44	22.08	18.72		08:00:00	26.22	38.94	19.08	48.6	33	40.62
09:00:00	20.58	16.68	31.86	27.84	43.02	34.14		09:00:00	37.92	42.84	28.14	29.52	15.72	24.48
10:00:00	14.22	28.98	16.86	30.42	17.52	18.36		10:00:00	37.68	30.6	41.28	25.44	33.96	36
11:00:00	17.04	5.58	11.28	11.58	11.4	8.4		11:00:00	41.04	44.58	45.48	42.24	36.48	45.24
12:00:00	14.58	19.32	20.4	23.58	17.16	13.62		12:00:00	39.84	31.98	35.76	32.28	40.02	40.98
13:00:00	26.88	2.46	41.28	16.26	38.52	39.42		13:00:00	28.08	52.08	18.72	37.38	17.94	18.6
14:00:00	18.66	17.82	22.26	20.76	17.28	15.48		14:00:00	32.88	34.38	36.06	34.62	41.88	43.74
15:00:00	29.4	20.58	28.08	16.8	34.14	48.54		15:00:00	27.54	34.32	31.92	37.38	24.96	9.6
16:00:00	34.62	10.68	27.84	9.48	29.64	28.8		16:00:00	17.88	43.32	32.16	44.34	27.78	28.92
17:00:00	25.02	19.56	39.78	27.36	32.52	39.96		17:00:00	29.04	34.44	20.22	29.82	24	19.44
18:00:00	43.92	18.78	42.96	27.12	43.38	57.12		18:00:00	13.2	38.34	17.04	28.86	14.76	2.88
19:00:00	60	49.08	56.34	42.6	52.38	59.88		19:00:00	0	10.92	3.66	16.86	7.26	0.12
20:00:00	59.4	60	44.58	35.34	46.08	60		20:00:00	0.6	0	15.42	23.76	13.92	0
21:00:00	59.94	57.12	60	30.12	38.88	60		21:00:00	0.06	2.88	0	27.18	19.56	0
22:00:00	59.82	44.88	35.76	30.48	47.58	20.76		22:00:00	0.18	14.4	24.24	27.84	12.06	36.12
23:00:00	60	48.48	59.88	26.58	33	60		23:00:00	0	11.52	0.12	31.14	24.78	0
1900-01-01	25.2	26.04	60	35.4	60	50.88		1900-01-01	34.38	32.22	0	23.22	0	9.12
1900-01-01 01:00:00	60	28.86	46.44	37.56	36.78	36.48		1900-01-01 01:00:00	0	28.8	13.56	20.64	21.66	22.08
1900-01-01 02:00:00	27.96	42.66	47.16	21.96	32.04	60		1900-01-01 02:00:00	26.76	16.56	12.84	34.8	22.86	0
1900-01-01 03:00:00	30.66	41.52	41.04	34.44	56.82	33		1900-01-01 03:00:00	25.38	18.48	18.96	23.52	3.18	23.04
1900-01-01 04:00:00	52.74	18.12	53.58	33.6	29.94	37.38		1900-01-01 04:00:00	7.26	37.38	6.42	25.86	27.48	17.16
1900-01-01 05:00:00	48.54	26.52	50.04	27.66	46.86	25.8		1900-01-01 05:00:00	10.2	31.14	9.96	31.02	10.02	30.48
1900-01-01 06:00:00	52.08	25.32	44.82	21.12	57.42	60		1900-01-01 06:00:00	7.92	30.96	15.18	36.42	2.58	0
CNO	Wake							CNO	NREM
	1	2	3	4	5	6			1	2	3	4	5	6
07:00:00	21.84	27.6	53.52	41.64	14.04	24		07:00:00	34.8	29.82	6.48	16.68	42.96	28.86
08:00:00	28.8	6.84	47.22	23.76	35.64	41.28		08:00:00	28.8	46.32	12.78	34.44	20.16	16.98
09:00:00	59.88	59.82	59.64	59.88	57.06	51.18		09:00:00	0.12	0.12	0.36	0.06	2.94	8.82
10:00:00	40.8	13.32	47.04	53.04	19.2	18.42		10:00:00	19.2	46.68	12.96	6.96	40.8	37.32
11:00:00	9.78	8.28	39.54	20.64	20.4	10.56		11:00:00	48.84	46.02	20.46	36.12	36.78	41.94
12:00:00	11.52	21.18	46.56	19.74	28.74	56.46		12:00:00	46.8	33.06	13.44	37.62	28.92	3.54
13:00:00	19.02	8.04	50.34	28.08	12	23.58		13:00:00	37.44	34.2	9.66	29.04	42.96	33.54
14:00:00	9.54	17.16	52.68	21.78	44.64	33.96		14:00:00	45.72	36.72	7.26	33.42	15.36	23.94
15:00:00	20.58	22.74	52.2	4.98	15.42	28.56		15:00:00	33.36	34.26	7.8	45.06	41.22	30.24
16:00:00	18.48	4.98	54.78	25.92	30.42	42.12		16:00:00	33.36	45.18	5.22	29.64	24.66	17.88
17:00:00	24.84	27.24	52.92	17.88	34.56	46.32		17:00:00	30.54	29.22	7.08	32.82	23.22	12.96
18:00:00	31.98	10.62	54.66	27.72	39.54	51.72		18:00:00	27	43.86	5.34	29.16	19.08	8.28
19:00:00	54.66	59.58	56.94	43.56	47.94	59.82		19:00:00	4.02	0.42	3.06	15.48	12.06	0.18
20:00:00	23.58	56.52	56.52	28.2	46.8	60		20:00:00	33.18	3.48	3.48	27.48	12.12	0
21:00:00	35.64	38.34	60	40.02	37.86	58.44		21:00:00	19.86	20.58	0	19.26	19.44	1.56
22:00:00	23.88	59.34	55.02	41.34	49.86	58.74		22:00:00	31.68	0.6	4.98	16.44	8.52	1.26
23:00:00	11.34	39.24	42.12	36.42	60	37.14		23:00:00	41.34	18.84	15.78	23.22	0	22.08
1900-01-01	27.84	20.16	60	33.78	29.58	56.28		1900-01-01	28.62	37.86	0	21	30.42	3.72
1900-01-01 01:00:00	16.92	46.98	60	28.8	48.06	27.54		1900-01-01 01:00:00	38.04	12.96	0	27.42	11.94	30.72
1900-01-01 02:00:00	14.88	42.54	33.66	31.32	26.76	36.48		1900-01-01 02:00:00	42.6	16.32	26.34	26.4	31.68	23.52
1900-01-01 03:00:00	22.44	20.82	30.12	20.16	48.84	31.02		1900-01-01 03:00:00	37.14	35.88	29.88	36.6	11.16	25.74
1900-01-01 04:00:00	33.54	29.76	42.78	41.94	44.16	58.2		1900-01-01 04:00:00	26.46	29.34	17.22	16.8	14.58	1.8
1900-01-01 05:00:00	52.08	32.4	41.46	26.94	39.84	34.8		1900-01-01 05:00:00	7.92	23.58	18.54	29.88	18.54	23.46
1900-01-01 06:00:00	38.16	21.66	35.04	30.54	41.94	60		1900-01-01 06:00:00	21.84	37.2	24.96	26.82	15.72	0

## Sheet: Figure 6I
Figure 6I
vehicle	Wake								vehicle	NREM
	1	2	3	4	5	6	7			1	2	3	4	5	6	7
07:00:00	16.62	25.08	12	12	38.34	32.04	14.82		07:00:00	37.92	33.78	46.8	46.8	21.54	22.2	38.22
08:00:00	38.94	26.76	21.24	7.74	36.12	34.38	46.92		08:00:00	19.08	28.38	33.78	45.84	23.82	24.24	11.04
09:00:00	42.24	35.46	24.42	30.66	20.82	26.22	34.56		09:00:00	17.76	24.54	32.16	28.8	35.46	30.84	23.34
10:00:00	20.04	15.36	19.44	12.12	11.46	27	15.72		10:00:00	36.54	42.48	37.32	43.98	45.6	28.68	41.52
11:00:00	21	12.72	18.18	12.42	17.82	11.4	40.56		11:00:00	31.56	43.86	38.22	43.38	37.2	40.62	17.46
12:00:00	34.14	21.54	29.04	19.68	22.92	31.8	22.74		12:00:00	23.64	37.38	26.94	36.06	31.86	23.16	33
13:00:00	12.72	16.98	24.66	13.14	38.52	17.82	9.96		13:00:00	40.14	38.88	30.06	39.18	19.2	39.36	44.22
14:00:00	34.26	24.06	12.96	25.92	13.32	18.66	32.16		14:00:00	20.94	32.88	37.56	25.98	40.62	32.82	25.02
15:00:00	27.48	31.26	23.16	17.64	22.68	18.36	28.38		15:00:00	30.96	28.02	32.52	39.54	30.78	36.78	28.38
16:00:00	15.12	26.46	37.86	14.52	23.64	36.24	20.04		16:00:00	36.18	33.24	18.78	37.8	35.28	21.96	38.34
17:00:00	38.64	26.64	19.92	23.52	28.98	26.82	23.82		17:00:00	18.72	32.52	34.56	31.44	29.94	27.24	34.08
18:00:00	27.78	36.54	37.86	20.64	28.02	31.08	30.72		18:00:00	27.96	20.64	18.24	31.98	26.4	23.46	28.74
19:00:00	60	60	40.74	29.76	45.6	55.14	38.52		19:00:00	0	0	16.92	29.46	13.14	4.86	20.52
20:00:00	42.36	60	60	42.72	60	60	36.96		20:00:00	17.22	0	0	16.8	0	0	22.08
21:00:00	26.88	60	47.94	22.26	50.52	41.58	59.94		21:00:00	30.36	0	12.06	34.86	9.48	16.56	0.06
22:00:00	33.66	52.08	34.44	21.36	40.98	58.86	36.96		22:00:00	21.54	7.92	23.58	36.06	19.02	1.14	23.04
23:00:00	36.12	13.68	48.36	15.84	52.02	55.92	46.02		23:00:00	18.54	42.06	10.32	33.24	7.56	4.08	13.98
1900-01-01	31.44	52.02	42.66	24.12	60	29.52	57.18		1900-01-01	25.86	7.38	16.92	34.38	0	27.54	2.82
1900-01-01 01:00:00	22.86	22.74	41.4	24.78	56.58	60	60		1900-01-01 01:00:00	31.8	35.76	15.48	32.46	3.42	0	0
1900-01-01 02:00:00	27.84	37.56	41.88	17.64	26.16	23.76	49.2		1900-01-01 02:00:00	27.84	21.12	16.86	36.84	32.22	34.08	10.8
1900-01-01 03:00:00	50.64	60	22.92	25.32	41.76	51.54	40.98		1900-01-01 03:00:00	8.58	0	31.74	33.66	17.58	6.54	19.02
1900-01-01 04:00:00	15.96	34.98	48.24	23.76	49.38	24.06	45.18		1900-01-01 04:00:00	40.32	24.48	9.18	35.52	9.12	33.24	14.82
1900-01-01 05:00:00	45.42	45.54	41.46	8.64	60	36.48	59.94		1900-01-01 05:00:00	12.66	14.46	16.98	49.08	0	21	0.06
1900-01-01 06:00:00	34.56	30.54	48.48	23.64	35.46	41.28	59.88		1900-01-01 06:00:00	23.46	27.06	10.56	34.02	22.38	14.22	0.12
CNO	Wake								CNO	NREM
	1	2	3	4	5	6	7			1	2	3	4	5	6	7
07:00:00	12.48	13.98	12	25.68	37.68	16.68	38.22		07:00:00	40.86	41.4	46.8	32.52	22.32	39.6	14.82
08:00:00	27.06	34.2	21	34.2	44.46	29.52	45.54		08:00:00	30.66	23.04	35.28	23.64	15.54	25.08	14.46
09:00:00	46.92	46.26	60	59.82	51.48	57.54	53.22		09:00:00	13.08	13.74	0	0.18	7.26	2.04	6.78
10:00:00	13.32	58.74	35.52	60	46.08	35.76	45.24		10:00:00	46.68	1.26	24.48	0	13.92	24.24	14.76
11:00:00	16.62	44.88	34.26	59.28	30.18	34.56	29.52		11:00:00	41.04	14.88	23.46	0.72	27.78	24.78	29.52
12:00:00	20.82	34.56	23.52	39.18	32.52	33.72	41.64		12:00:00	34.86	24.78	34.26	14.52	24.48	23.76	16.74
13:00:00	17.16	29.16	34.08	11.04	17.46	18.72	28.32		13:00:00	37.8	26.64	23.82	28.08	37.86	34.2	31.68
14:00:00	33.12	29.04	32.64	18.66	36.66	21.12	17.16		14:00:00	24.12	29.82	24	36.18	22.98	32.88	42.84
15:00:00	29.16	22.02	12.72	14.82	16.26	17.88	24.54		15:00:00	26.4	33.24	42.54	43.14	37.26	33.54	35.46
16:00:00	18.06	22.68	27.36	14.16	27.66	29.22	14.64		16:00:00	39.66	35.64	29.28	41.52	32.34	27.12	45.36
17:00:00	21.12	30.42	9.18	30.12	36.84	14.76	9.24		17:00:00	33.18	28.2	41.28	25.14	20.76	33.84	50.76
18:00:00	37.56	39.06	29.16	19.56	34.14	35.94	5.16		18:00:00	21.18	19.08	27.78	36.66	25.86	21.6	54.84
19:00:00	60	59.76	40.14	28.74	54.48	59.82	19.08		19:00:00	0	0.24	18.48	29.82	5.52	0.18	40.92
20:00:00	42.24	59.94	60	42.48	53.22	44.22	19.26		20:00:00	17.22	0.06	0	17.52	6.78	14.22	40.74
21:00:00	42.06	60	37.56	34.38	59.34	31.32	15.54		21:00:00	15.72	0	19.62	23.46	0.66	21.96	44.46
22:00:00	34.08	53.64	45	11.82	59.46	60	28.26		22:00:00	22.86	6.36	14.34	46.08	0.54	0	31.74
23:00:00	10.26	20.34	43.32	31.32	54.66	33.12	19.92		23:00:00	43.38	39.48	13.68	27.36	5.34	23.28	40.08
1900-01-01	13.44	59.88	29.52	15.54	49.74	57.36	36.72		1900-01-01	42.36	0.12	28.38	38.4	8.76	2.64	23.28
1900-01-01 01:00:00	26.52	43.86	60	20.16	50.94	32.64	42.54		1900-01-01 01:00:00	32.58	14.94	0	37.74	9.06	24.06	17.46
1900-01-01 02:00:00	19.92	49.56	36.36	15.12	57	33.06	17.52		1900-01-01 02:00:00	36.72	9.12	18	43.02	3	24.72	42.48
1900-01-01 03:00:00	29.94	31.68	24	22.74	40.8	34.02	12		1900-01-01 03:00:00	29.58	26.88	31.14	32.04	19.2	22.74	48
1900-01-01 04:00:00	22.26	30.24	35.88	26.28	59.94	46.08	5.46		1900-01-01 04:00:00	34.26	25.56	20.28	30.48	0.06	13.92	54.54
1900-01-01 05:00:00	22.44	45	48.42	23.82	36.06	51.78	7.02		1900-01-01 05:00:00	35.52	14.88	9.72	33.78	21.84	6.12	52.98
1900-01-01 06:00:00	29.46	48.72	34.32	23.46	48.72	48.72	48.72		1900-01-01 06:00:00	28.92	9.36	22.44	33.96	9.36	9.36	9.36
