# Supplementary material for: Dysfunctions of the paraventricular hypothalamic nucleus induce hypersomnia in mice
Source: eLife. 2021 Nov 17;10:e69909. doi: 10.7554/eLife.69909 (PMC8631797; doi:10.7554/eLife.69909)
Supplement: Figure 7—source data 1. [file elife-69909-fig7-data1.xlsx]

## Sheet: Figure 7C
Figure 7C
	n=7	CNO	1	2	3	4	5	6	7		n=7	CNO	1	2	3	4	5	6	7
	NREM sleep	19:00:00	19.8	19.86	11.76	8.04	31.14	30.42	15.6		Wake	19:00:00	37.26	39.72	46.62	51.42	26.16	27.66	41.58
		20:00:00	15.84	9.06	19.62	12.18	25.08	25.86	6.18			20:00:00	44.04	50.64	39.96	47.04	32.04	33.66	53.82
		21:00:00	7.56	30.6	17.4	7.56	13.38	25.44	11.76			21:00:00	52.44	28.74	42.54	51.12	46.44	34.2	45.66
		22:00:00	30.66	41.94	25.74	42.48	42.36	41.94	31.32			22:00:00	28.62	16.62	32.04	12.48	15.24	15.66	23.88
		23:00:00	32.22	33.72	30.42	28.6	27.72	42.18	28.54			23:00:00	25.92	21.36	27	28.28	29.94	14.46	28.4
		1900-01-01	29.06	33.48	38.94	34.02	31.8	32.94	31.76			1900-01-01	30.94	24.72	17.64	25.68	26.46	23.64	28
		1900-01-01 01:00:00	16.74	25.02	26.28	30.84	21	39	7.8			1900-01-01 01:00:00	43.26	34.26	32.88	24.78	37.26	18.84	49.44
		1900-01-01 02:00:00	25.62	7.86	16.68	18	34.08	33.72	8.16			1900-01-01 02:00:00	33.42	51.66	42.6	38.52	24.48	24.84	51.84
		1900-01-01 03:00:00	31.32	7.86	17.16	18.66	20.88	28.62	6.96			1900-01-01 03:00:00	26.46	52.14	42.48	38.52	38.22	30.48	52.92
		1900-01-01 04:00:00	41.16	7.32	18.18	21.6	26.76	33.12	23.64			1900-01-01 04:00:00	13.2	52.68	41.52	31.38	32.82	23.22	35.28
		1900-01-01 05:00:00	12.54	45.84	26.58	20.64	26.58	35.82	13.44			1900-01-01 05:00:00	45.78	11.64	31.14	38.34	32.04	23.94	46.44
		1900-01-01 06:00:00	33.6	10.98	24.6	29.64	3.12	25.92	23.88			1900-01-01 06:00:00	23.94	46.62	32.88	29.34	56.88	33.72	31.26
		1900-01-01 07:00:00	36.72	45.48	30.42	36.66	18.66	25.86	10.92			1900-01-01 07:00:00	14.94	7.98	22.68	14.34	41.34	33.84	48.12
		1900-01-01 08:00:00	20.16	29.64	13.8	27.42	21.84	31.74	40.86			1900-01-01 08:00:00	38.64	28.44	43.08	30.24	38.16	27.6	10.38
		1900-01-01 09:00:00	32.58	38.76	41.28	41.22	42.36	37.08	23.52			1900-01-01 09:00:00	18.84	15.06	9.54	9.06	15.54	21.72	32.82
		1900-01-01 10:00:00	35.28	28.86	25.44	20.46	47.16	32.28	33.48			1900-01-01 10:00:00	15.24	27.36	29.34	32.76	10.14	26.88	20.28
		1900-01-01 11:00:00	36.66	30.54	35.82	40.98	51.96	35.94	36.72			1900-01-01 11:00:00	14.04	22.92	20.04	12.72	4.92	22.62	16.68
		1900-01-01 12:00:00	30.48	45	19.98	28.56	21.06	29.82	23.82			1900-01-01 12:00:00	27.84	6.36	34.86	26.22	38.88	29.28	29.28
		1900-01-01 13:00:00	39.06	14.64	32.52	23.58	44.04	30.66	31.62			1900-01-01 13:00:00	6.78	43.62	20.52	32.16	14.22	28.44	21.78
		1900-01-01 14:00:00	24.24	26.88	27.18	28.2	50.82	40.86	36.24			1900-01-01 14:00:00	30.72	29.64	28.98	22.8	6.18	16.38	13.08
		1900-01-01 15:00:00	42.36	40.92	23.58	36.6	44.52	24.6	29.46			1900-01-01 15:00:00	12.24	9.54	31.74	16.68	13.26	33.96	21.42
		1900-01-01 16:00:00	31.02	27.06	35.76	24.06	47.58	33.78	35.52			1900-01-01 16:00:00	21.6	28.68	18.24	33.42	10.08	23.64	19.56
		1900-01-01 17:00:00	29.22	42.36	29.94	28.92	53.4	32.34	26.76			1900-01-01 17:00:00	29.52	7.68	24.54	25.02	4.2	25.26	26.4
		1900-01-01 18:00:00	20.58	17.4	29.46	20.52	30.42	34.2	26.94			1900-01-01 18:00:00	35.58	39.66	23.28	37.08	28.14	24.48	26.76
		Vehicle	1	2	3	4	5	6	7			Vehicle
		19:00:00	23.46	27.48	17.16	9.06	17.16	34.8	14.52			19:00:00	32.88	31.14	42.6	49.56	40.74	20.82	44.22
		20:00:00	2.58	11.82	2.16	18.6	9	21.24	4.38			20:00:00	57.42	48.12	57.84	38.16	50.46	35.76	55.62
		21:00:00	8.88	12	21.18	15.6	9.84	10.62	11.22			21:00:00	51.12	46.74	38.82	43.74	49.86	48.72	47.16
		22:00:00	3.42	34.2	25.86	13.32	15.6	17.88	3.84			22:00:00	56.58	22.26	30.78	44.4	41.82	40.26	56.16
		23:00:00	27.6	18.84	20.64	20.46	6.42	16.44	7.98			23:00:00	31.26	40.56	38.64	38.34	53.4	42.48	51.18
		1900-01-01	22.02	16.38	12.48	24.66	18.66	25.86	7.74			1900-01-01	37.98	43.08	46.08	32.34	38.22	28.32	52.26
		1900-01-01 01:00:00	24.66	13.62	14.46	22.98	6	21.42	15.84			1900-01-01 01:00:00	30.96	46.32	45.54	34.56	52.86	36.18	40.62
		1900-01-01 02:00:00	25.38	3.12	11.22	19.8	13.26	19.08	34.38			1900-01-01 02:00:00	29.28	56.76	48.72	35.94	45.96	37.8	19.14
		1900-01-01 03:00:00	12.42	36.42	30.54	25.32	5.34	29.82	2.4			1900-01-01 03:00:00	47.58	22.68	26.64	29.52	52.56	26.28	54.18
		1900-01-01 04:00:00	32.34	10.8	28.38	24.18	6	10.14	20.52			1900-01-01 04:00:00	24.96	49.2	28.14	32.16	52.56	49.86	36.6
		1900-01-01 05:00:00	33.78	36.84	21.36	22.44	10.02	8.88	11.04			1900-01-01 05:00:00	18.72	19.86	36.72	34.56	49.62	51.12	47.64
		1900-01-01 06:00:00	24.36	33.12	41.76	21.72	38.4	11.4	0.06			1900-01-01 06:00:00	32.76	21.66	9.06	36.48	25.26	48.6	59.94
		1900-01-01 07:00:00	38.34	32.76	38.22	42.54	33.96	31.02	26.4			1900-01-01 07:00:00	16.44	23.34	17.64	9	23.52	24.24	30.84
		1900-01-01 08:00:00	36.18	40.74	39.06	24.96	39.18	35.46	32.22			1900-01-01 08:00:00	17.88	14.94	14.58	31.38	18.12	20.46	22.08
		1900-01-01 09:00:00	18.42	43.62	18.48	31.68	29.64	43.86	43.32			1900-01-01 09:00:00	40.26	8.28	38.94	23.22	28.26	7.86	9.48
		1900-01-01 10:00:00	33.12	44.64	39.84	28.02	20.76	34.62	12.66			1900-01-01 10:00:00	22.56	5.82	8.88	24.6	36.6	22.14	45.42
		1900-01-01 11:00:00	30.66	24.6	28.08	36.12	30.96	34.74	37.2			1900-01-01 11:00:00	25.68	32.64	26.58	17.16	28.68	20.52	13.08
		1900-01-01 12:00:00	31.74	43.62	40.02	30.06	29.04	35.88	20.52			1900-01-01 12:00:00	24.66	7.8	11.76	24.06	29.82	22.14	36.06
		1900-01-01 13:00:00	38.64	43.68	34.62	13.86	20.22	37.08	34.68			1900-01-01 13:00:00	10.56	10.86	19.26	43.44	37.68	18.6	19.14
		1900-01-01 14:00:00	23.34	38.88	43.8	41.04	27.06	28.38	32.64			1900-01-01 14:00:00	31.98	14.4	10.92	8.52	31.32	29.16	17.94
		1900-01-01 15:00:00	37.74	23.82	22.38	29.82	31.68	36.06	26.94			1900-01-01 15:00:00	17.94	34.56	32.82	26.34	26.28	20.82	28.14
		1900-01-01 16:00:00	29.22	48.48	28.08	22.44	28.2	34.86	38.46			1900-01-01 16:00:00	28.86	6.06	27.06	34.32	30.42	22.32	12.6
		1900-01-01 17:00:00	26.4	23.04	30.66	29.88	30.24	32.28	31.14			1900-01-01 17:00:00	30.72	34.92	26.22	22.98	26.94	25.92	22.08
		1900-01-01 18:00:00	22.98	41.88	29.34	18.42	15.42	32.94	15.06			1900-01-01 18:00:00	35.34	12.36	24.66	38.58	42.66	23.82	41.58

## Sheet: Figure 7F
Figure 7F
		caspase3	NREM									caspase3	Wake
	n=7		1	2	3	4	5	6	7				1	2	3	4	5	6	7
		19:00:00	8.88	6	7.2	19.32	12.06	23.76	32.94			19:00:00	52.86	49.2	40.02	53.28	52.8	34.92	47.04
		20:00:00	0.36	0	7.86	22.02	0.06	45.96	12.66			20:00:00	42.74	49.58	50.4	40	42.14	45.88	34.04
		21:00:00	22.56	10.14	44.22	18.72	32.82	16.98	31.56			21:00:00	42.6	36.18	41.76	39.86	18.58	40.62	25.26
		22:00:00	39.42	30.48	37.62	19.86	14.64	43.26	9.84			22:00:00	23.28	19.02	43.98	26.88	16.62	37.98	42.24
		23:00:00	26.16	38.52	43.44	27.36	21	46.86	21.6			23:00:00	31.62	28.8	36.92	25.72	21.04	31.02	38.28
		1900-01-01	32.22	0.06	11.28	34.8	35.34	10.68	35.76			1900-01-01	36.72	20.58	31.74	49.94	47.76	29.98	20.46
		1900-01-01 01:00:00	25.62	45.42	41.94	3.84	8.22	48.72	19.14			1900-01-01 01:00:00	45.24	27.24	29.58	10.32	20.14	44.72	51.78
		1900-01-01 02:00:00	22.14	15.78	41.28	17.64	40.44	42.06	28.26			1900-01-01 02:00:00	18.66	35.58	39.24	41.58	12.42	42.12	13.62
		1900-01-01 03:00:00	13.74	28.08	33.72	49.26	31.32	44.52	2.58			1900-01-01 03:00:00	37.86	42.78	33.54	28.38	21.72	7.62	22.32
		1900-01-01 04:00:00	16.44	27.48	41.22	11.82	15.66	19.32	24.78			1900-01-01 04:00:00	34.02	40.86	42	27.66	12.24	47.58	43.74
		1900-01-01 05:00:00	6.06	0	6.12	0	8.46	33.18	0			1900-01-01 05:00:00	49.26	53.94	43.56	60	53.88	60	51.54
		1900-01-01 06:00:00	2.76	0	5.64	4.74	0.54	38.04	24.54			1900-01-01 06:00:00	44.76	57.24	44.44	50	54.36	55.26	59.46
		1900-01-01 07:00:00	37.68	13.8	4.44	27.24	17.94	21.06	32.52			1900-01-01 07:00:00	20.94	17.22	18.6	46.2	55.56	31.02	42.06
		1900-01-01 08:00:00	35.04	45.6	24.48	44.64	44.16	50.04	27.54			1900-01-01 08:00:00	41.28	19.02	29.22	8.64	34.56	6.6	9.54
		1900-01-01 09:00:00	20.94	37.08	16.08	18.12	32.22	21.6	44.16			1900-01-01 09:00:00	15	35.76	18.66	16.44	42.24	39.6	25.62
		1900-01-01 10:00:00	24.6	47.28	48.84	40.62	35.52	49.44	11.82			1900-01-01 10:00:00	23.94	33.72	24.6	6.96	4.68	16.32	17.76
		1900-01-01 11:00:00	28.02	14.22	49.56	35.16	47.88	41.46	41.88			1900-01-01 11:00:00	31.08	27.54	9.24	40.56	4.2	19.44	6.66
		1900-01-01 12:00:00	29.28	39.78	37.8	33.24	36.12	49.44	3.6			1900-01-01 12:00:00	37.8	27.48	34.44	16.98	18.54	15.78	17.94
		1900-01-01 13:00:00	24.78	32.16	46.2	25.32	29.58	28.98	47.58			1900-01-01 13:00:00	30.06	30.42	12.24	22.38	9.06	29.94	25.98
		1900-01-01 14:00:00	38.4	45.42	44.28	40.86	35.04	49.26	33.42			1900-01-01 14:00:00	43.08	17.94	28.38	16.42	14.38	16.8	21.78
		1900-01-01 15:00:00	25.38	43.44	38.04	46.26	36.6	16.38	19.32			1900-01-01 15:00:00	18	29.64	39.84	9.42	19.14	4.92	17.34
		1900-01-01 16:00:00	40.26	1.74	36.84	26.28	38.16	50.34	39.24			1900-01-01 16:00:00	12.54	22.24	15.6	48.26	15.96	31.14	13.56
		1900-01-01 17:00:00	25.44	48.84	37.74	38.46	27.42	23.34	28.98			1900-01-01 17:00:00	37.14	28.56	34.88	14.2	18.48	15.24	27.72
		1900-01-01 18:00:00	25.68	34.2	25.08	30.6	39.96	35.46	30.36			1900-01-01 18:00:00	35.52	25.38	28.08	22.68	31.38	25.44	14.34
		vehicle										vehicle
			1	2	3	4	5	6					1	2	3	4	5	6
		19:00:00	23.46	7.92	0	0	9	13.56				19:00:00	42.88	50.82	60	50	50.58	46.2
		20:00:00	2.58	6.18	6	0.06	0.12	1.38				20:00:00	57.42	52.86	52	49.94	59.64	58.38
		21:00:00	8.88	21.36	13.38	11.58	6.42	3.12				21:00:00	51.12	41.34	45.18	48.36	58.86	56.88
		22:00:00	9.42	4.62	21.72	16.44	0.54	0.36				22:00:00	56.58	51.6	41.02	43.36	59.16	59.64
		23:00:00	18	15.12	7.38	6.84	12.24	10.26				23:00:00	44.86	42.24	52.62	53.04	47.76	45.68
		1900-01-01	22.02	17.4	13.14	6	16.8	7.44				1900-01-01	37.98	34.86	46.32	50	37.06	57.42
		1900-01-01 01:00:00	6.66	16.26	23.46	28.02	19.38	6.12				1900-01-01 01:00:00	48.96	41.22	35.98	28.2	39.12	49.28
		1900-01-01 02:00:00	19.38	15.48	18.78	25.14	13.44	20.94				1900-01-01 02:00:00	35.28	42.66	26.52	34.08	44.28	37.2
		1900-01-01 03:00:00	12.42	9.42	0	18.72	9.84	28.2				1900-01-01 03:00:00	47.58	49.98	50	28.72	40.16	31.42
		1900-01-01 04:00:00	26.34	2.76	0	6.54	10.74	3.48				1900-01-01 04:00:00	38.96	56.28	52	53.4	49.2	55.2
		1900-01-01 05:00:00	33.78	10.08	0	28.8	11.94	15.06				1900-01-01 05:00:00	40.72	48.66	60	41.66	47.82	42.66
		1900-01-01 06:00:00	24.36	24.96	0	28.62	30.54	19.62				1900-01-01 06:00:00	32.76	34.62	60	30.54	27	40.38
		1900-01-01 07:00:00	38.34	23.34	0.18	25.68	28.26	21.18				1900-01-01 07:00:00	16.44	34.98	59.82	33.72	30.72	36.54
		1900-01-01 08:00:00	36.18	19.98	25.02	36.12	31.68	49.62				1900-01-01 08:00:00	17.88	37.74	32.64	18.18	24.18	3.24
		1900-01-01 09:00:00	18.42	25.62	27.06	26.34	22.68	30.06				1900-01-01 09:00:00	46.26	32.46	31.08	31.08	42.48	27.78
		1900-01-01 10:00:00	33.12	26.58	40.74	40.32	37.2	43.26				1900-01-01 10:00:00	22.56	34.56	11.82	14.76	19.26	15.12
		1900-01-01 11:00:00	36.66	27.96	24.66	36.78	34.74	25.92				1900-01-01 11:00:00	31.68	35.22	32.94	34.74	21.78	31.74
		1900-01-01 12:00:00	31.74	23.52	27.78	44.58	10.56	43.62				1900-01-01 12:00:00	24.66	33.72	27.78	16.6	38.12	8.28
		1900-01-01 13:00:00	38.64	31.44	35.34	28.8	35.04	22.8				1900-01-01 13:00:00	10.56	22.86	18.72	25.68	21.78	35.46
		1900-01-01 14:00:00	41.34	27.06	25.08	32.46	37.92	29.52				1900-01-01 14:00:00	31.98	50.76	28.56	26.52	31.08	24
		1900-01-01 15:00:00	37.74	21.96	28.92	42.42	31.68	45.84				1900-01-01 15:00:00	17.94	36.78	24.06	10.26	25.2	7.02
		1900-01-01 16:00:00	29.22	31.74	22.8	28.56	13.38	33.48				1900-01-01 16:00:00	28.86	23.76	34.8	28.74	45.96	23.58
		1900-01-01 17:00:00	26.4	13.56	26.28	26.64	25.44	34.74				1900-01-01 17:00:00	30.72	45.84	31.26	31.56	32.94	18.6
		1900-01-01 18:00:00	22.98	16.32	31.98	17.82	27.42	36.6				1900-01-01 18:00:00	35.34	41.94	20.4	40.62	29.64	18.48
